# Supplementary material
Source: PubMed Central journal article supplement (PMC4547529)
Supplement: NIHMS716466-supplement-Supplemental.pdf [file NIHMS716466-supplement-Supplemental.pdf]

*Supporting Information for:*  
**Enantioselective Conjugate Additions of  $\alpha$ -Amino Radicals via Cooperative Photoredox and Lewis Acid Catalysis.**

Laura Ruiz Espelt, Iain S. McPherson, Eric M. Wiensch, and Tehshik P. Yoon\*  
*Department of Chemistry, University of Wisconsin-Madison, 1101 University Avenue, Madison, WI, 53706*

**Table of Contents.**

|              |                                                    |       |
|--------------|----------------------------------------------------|-------|
| <b>I.</b>    | <b>General Information</b>                         | S-1   |
| <b>II.</b>   | <b>Ligand Synthesis</b>                            | S-2   |
| <b>III.</b>  | <b>Synthesis of Substrates</b>                     | S-2   |
| <b>IV.</b>   | <b>Photochemical Reactions</b>                     | S-7   |
| <b>V.</b>    | <b>Removal of the Auxiliary</b>                    | S-16  |
| <b>VI.</b>   | <b>Synthesis of Compounds for X-Ray Structures</b> | S-18  |
| <b>VII.</b>  | <b>Spectra</b>                                     | S-20  |
| <b>VIII.</b> | <b>SFC Traces</b>                                  | S-74  |
| <b>IX.</b>   | <b>X-Ray Structures</b>                            | S-98  |
| <b>X.</b>    | <b>Chloride Effect Control Studies</b>             | S-111 |
| <b>XI.</b>   | <b>CFL Emission</b>                                | S-111 |
| <b>XII.</b>  | <b>Proposed mechanism</b>                          | S-112 |
| <b>XIII.</b> | <b>References</b>                                  | S-113 |

### **I. General Information**

Acetonitrile, toluene and THF were purified by elution through alumina as described by Grubbs.<sup>1</sup> Ru(bpy)<sub>3</sub>Cl<sub>2</sub> · 6H<sub>2</sub>O and Sc(OTf)<sub>3</sub> were purchased from Strem and used without further purification. Substrates **1**,<sup>2</sup> **2b**,<sup>3</sup> from Table 1 and 1-((trimethylsilyl)methyl)piperidine<sup>4</sup> from Table 2 were prepared as previously described. All other substrates were synthesized as described below. All other chemicals were purchased from commercial suppliers and used without further purification. Flash column chromatography<sup>5</sup> was performed using Purasil 60Å silica gel (230–400 mesh). All glassware was oven-dried at 130 °C for at least 1 h or flame-dried immediately prior to use.

All NMR spectra were obtained at ambient temperature on Varian Unity-500 and Varian Inova-500 spectrometers. Chemical shifts are reported in parts per million ( $\delta$ ) relative to TMS (0.0 ppm) for <sup>1</sup>H NMR data and CDCl<sub>3</sub> (77.23 ppm) for <sup>13</sup>C NMR data. IR spectral data were obtained using a Bruker Vector 22 spectrometer. Melting points were obtained using a Mel-Temp II (Laboratory Devices, Inc., USA) melting point apparatus. Mass spectrometry was performed with a Micromass LCT (electrospray ionization, time-of-flight analyzer or electron impact). These facilities are funded by the NSF (CHE-9974839, CHE-9304546), NIH (RR08389-01) and the University of Wisconsin. Enantiomeric excesses were determined by chiral SFC of isolated material using a Waters Investigator system with Daicel CHIRALPAK® columns and Chromasolv®-grade *i*-PrOH and MeOH. The enantiomeric excess of compound 5-55 was determined by chiral GC of isolated material using a  $\beta$ -DEX 225 column (30 m x 0.25 mm i.d.). Optical rotations were measured using a Rudolph Research Autopol III polarimeter at room temperature

## II. Ligand Synthesis

**2,6-Bis((S)-4-isobutyl-4,5-dihydrooxazol-2-yl)pyridine ((S,S)-4c).** Prepared using a modification of the procedure described by García, Pires, and coworkers.<sup>6</sup> A 100 mL round bottom flask fitted with a reflux condenser was charged with pyridine-2,6-dicarbonitrile (555 mg, 4.3 mmol, 1 equiv) and flame-dried zinc triflate (153 mg, 0.42 mmol, 0.1 equiv). The system was purged with argon, and anhydrous toluene (28 mL) was added. The solution was stirred for 5 min and a solution of (S)-leucinol (1 g, 8.6 mmol, 2 equiv) in anhydrous toluene (12 mL) was added.

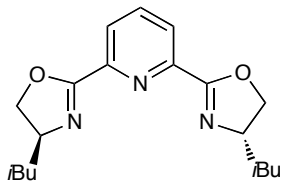

The solution was heated under reflux for 48 h. The system was allowed to cool, and the reaction was diluted with 40 mL of EtOAc. The solution was then washed with brine (3 x 60 mL) and NaHCO<sub>3</sub> (3 x 50 mL), dried with MgSO<sub>4</sub>, and the solvent evaporated to give crude product (1.25 g, 3.8 mmol, 89% yield). The crude product was further purified by recrystallization from hot hexanes before use.  $[\alpha]_D^{22}$  -121.1 (c1.020, CH<sub>2</sub>Cl<sub>2</sub>). IR (thin film): 2951, 2900, 1633, 1568, 1461 cm<sup>-1</sup>; <sup>1</sup>H NMR (500 MHz, CDCl<sub>3</sub>)  $\delta$  8.18 (d, *J* = 7.8 Hz, 2H), 7.85 (t, *J* = 7.8 Hz, 1H), 4.61 (dd, *J* = 9.5, 8.2 Hz, 2H), 4.39 (dtd, *J* = 9.4, 7.9, 6.7 Hz, 2H), 4.09 (t, *J* = 8.2 Hz, 2H), 1.85 (dp, *J* = 13.4, 6.7 Hz, 2H), 1.73 (dt, *J* = 13.6, 6.8 Hz, 2H), 1.40 (dt, *J* = 13.4, 7.3 Hz, 2H), 0.98 (dd, *J* = 9.1, 6.6 Hz, 12H). <sup>13</sup>C NMR (125 MHz, CDCl<sub>3</sub>)  $\delta$  162.11, 146.94, 137.21, 125.61, 73.81, 65.38, 45.49, 25.45, 22.80, 22.71. HRMS (ESI<sup>+</sup>) calc'd for [C<sub>19</sub>H<sub>27</sub>N<sub>3</sub>O<sub>2</sub>+H]<sup>+</sup> requires *m/z* 330.2177, found *m/z* 330.2184. (mp = 120–123 °C).

**2,6-Bis((R)-4-isobutyl-4,5-dihydrooxazol-2-yl)pyridine ((R,R)-4c).** The enantiomeric ligand was produced using the same protocol beginning with (R)-leucinol. Obtained 1.09 g (3.3 mmol, 80% yield). The crude product was further purified by recrystallization from hot hexanes.  $[\alpha]_D^{22}$  +119.5 (c0.960, CH<sub>2</sub>Cl<sub>2</sub>). (mp = 121–125 °C).

## III. Synthesis of Substrates

### A) Synthesis of aniline derivatives

**General Procedure A:** This protocol is based upon a procedure described by Mariano and coworkers.<sup>2</sup> To a solution of aniline (9.3 mmol, 1 equiv) in THF (0.3 M) under N<sub>2</sub> at -78 °C was added dropwise a solution of *n*BuLi in hexanes (1.6 M, 8 mL, 10.2 mmol, 1.1 equiv). The solution was then allowed to warm to room temperature. After 24 h, (iodomethyl)trimethylsilane (10.2 mmol, 1.6 mL, 1.1 equiv) was added slowly, and the resulting solution was stirred for 12 h. The reaction was then quenched by slow addition of a saturated solution of NH<sub>4</sub>Cl (10 mL) and extracted with Et<sub>2</sub>O (3 x 20 mL). The combined organic layers were dried over MgSO<sub>4</sub> and concentrated in vacuo to afford a residue that was purified on silica gel.

**General Procedure B:** To a solution of aniline (3 mmol, 1 equiv) in THF (0.3 M) and freshly distilled HMPA (17% in volume, 1.7 mL) under N<sub>2</sub> at 78 °C was added dropwise a solution of *n*BuLi in hexanes (1.6 M, 2.6 mL, 1.1 equiv). The solution was then allowed to warm to room temperature. After 24 h (iodomethyl)trimethylsilane (0.6 mL, 1.1 equiv) was added slowly, and the resulting solution was stirred for 12 h at room temperature. The reaction was then quenched by the slow addition of a saturated solution of NH<sub>4</sub>Cl (6 mL) and extracted with Et<sub>2</sub>O (3 x 15 mL). The combined organic layers were dried over MgSO<sub>4</sub>, filtered, and concentrated in vacuo to afford a residue that was purified on silica gel.

**4-Fluoro-*N*-methyl-*N*-((trimethylsilyl)methyl)aniline.** (Table 2, entry 2). Followed procedure A. The crude oil obtained was purified by chromatography on silica gel using 95:5 hexanes:Et<sub>2</sub>O as the eluent to afford the product as a yellow oil (1.2 g, 63% yield). IR (thin film): 2955, 1515, 1227 cm<sup>-1</sup>; <sup>1</sup>H NMR (500 MHz, CDCl<sub>3</sub>)  $\delta$  6.90 (dd, *J* = 9.2, 8.4 Hz, 2H), 6.58 (dd, *J* = 9.2, 4.3 Hz, 2H), 2.88 (s, 3H), 2.79 (s, 2H), 0.07 (s, 9H); <sup>13</sup>C NMR (125 MHz, CDCl<sub>3</sub>)  $\delta$  156.9 (*J* = 232.5 Hz), 149.8 (*J* = 1.3 Hz), 117.4 (*J* = 21.3 Hz), 114.2 (*J* = 6.3 Hz), 45.1, 41.1, -0.9. HRMS (ESI<sup>+</sup>) calc'd for [C<sub>11</sub>H<sub>18</sub>FNSi+H]<sup>+</sup> requires *m/z* 212.1268, found *m/z* 212.1266.

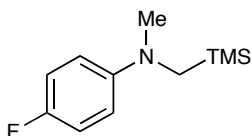

**4-Chloro-*N*-methyl-*N*-((trimethylsilyl)methyl)aniline.** (Table 2, entry 3). Followed procedure A. The crude oil obtained was purified by chromatography on silica gel using 95:5 hexanes:Et<sub>2</sub>O as the eluent to afford the product as a yellow oil (920 mg, 45% yield). IR (thin film): 2954, 1596, 1503, 1369 cm<sup>-1</sup>; <sup>1</sup>H NMR (500 MHz, CDCl<sub>3</sub>) δ 7.12 (d, *J* = 9.1 Hz, 2H), 6.54 (d, *J* = 9.1 Hz, 2H), 2.90 (s, 3H), 2.83 (s, 2H), 0.07 (s, 9H); <sup>13</sup>C NMR (125 MHz, CDCl<sub>3</sub>) δ 151.3, 146.6, 114.8, 114.3, 56.1, 45.6, 41.6, -0.9. HRMS (ESI<sup>+</sup>) calc'd for [C<sub>11</sub>H<sub>18</sub>ClNSi+H]<sup>+</sup> requires *m/z* 228.0970, found *m/z* 228.0970.

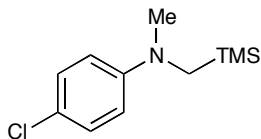

**4-Bromo-*N*-methyl-*N*-((trimethylsilyl)methyl)aniline.** (Table 2, entry 4). Followed procedure A. The crude oil obtained was purified by chromatography on silica gel using 20:1 hexanes:EtOAc as the eluent to afford the product as a yellow oil (1.4 g, 56% yield). IR (thin film): 2953, 2894, 1592, 1501 cm<sup>-1</sup>; <sup>1</sup>H NMR (500 MHz, CDCl<sub>3</sub>) δ 7.24 (d, *J* = 9.0 Hz, 2H), 6.49 (d, *J* = 8.9 Hz, 2H), 2.90 (s, 3H), 2.82 (s, 2H), 0.07 (s, 9H); <sup>13</sup>C NMR (125 MHz, CDCl<sub>3</sub>) δ 149.4, 131.7, 113.4, 106.9, 44.2, 40.5, -0.9. HRMS (ESI<sup>+</sup>) calc'd for [C<sub>11</sub>H<sub>18</sub>BrNSi+H]<sup>+</sup> requires *m/z* 272.0465, found *m/z* 272.0664.

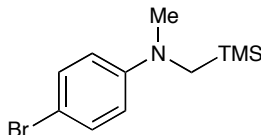

***N*,4-Dimethyl-*N*-((trimethylsilyl)methyl)aniline.** (Table 2, entry 5). Followed procedure A. The crude oil obtained was purified by chromatography on silica gel using 95:5 hexanes:Et<sub>2</sub>O as the eluent to afford the product as a yellow oil (1.4 g, 74% yield). IR (thin film): 2553, 2801, 1618, 1520 cm<sup>-1</sup>; <sup>1</sup>H NMR (500 MHz, CDCl<sub>3</sub>) δ 7.01 (d, *J* = 8.4 Hz, 2H), 6.59 (d, *J* = 8.6 Hz, 2H), 2.88 (s, 3H), 2.80 (s, 2H), 2.23 (s, 3H), 0.08 (s, 9H); <sup>13</sup>C NMR (125 MHz, CDCl<sub>3</sub>) δ 149.0, 129.6, 124.6, 112.4, 44.5, 40.7, 20.4, -0.9. HRMS (ESI<sup>+</sup>) calc'd for [C<sub>12</sub>H<sub>21</sub>NSi+H]<sup>+</sup> requires *m/z* 208.1519, found *m/z* 208.1517.

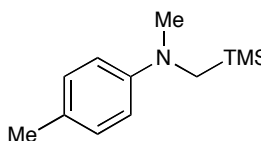

**4-Methoxy-*N*-methyl-*N*-((trimethylsilyl)methyl)aniline.** (Table 2, entry 6). Followed procedure A. The crude oil obtained was purified by chromatography on silica gel using 80:20 hexanes:EtOAc as the eluent to afford the product as a yellow oil (1.2 g, 60% yield). IR (thin film): 2952, 2831, 1512, 1465 cm<sup>-1</sup>; <sup>1</sup>H NMR (500 MHz, CDCl<sub>3</sub>) δ 6.81 (d, *J* = 9.1 Hz, 2H), 6.67 (d, *J* = 9.0 Hz, 2H), 3.75 (s, 3H), 2.85 (s, 3H), 2.75 (s, 2H), 0.07 (s, 9H); <sup>13</sup>C NMR (125 MHz, CDCl<sub>3</sub>) δ 151.3, 146.6, 114.8, 114.3, 56.0, 45.5, 41.6, -0.9. HRMS (ESI<sup>+</sup>) calc'd for [C<sub>11</sub>H<sub>21</sub>NOSi+H]<sup>+</sup> requires *m/z* 224.1456, found *m/z* 224.1466.

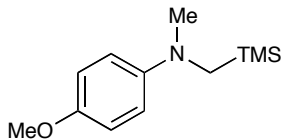

**3-Methoxy-*N*-methyl-*N*-((trimethylsilyl)methyl)aniline.** (Table 2, entry 7). Follow procedure A. The crude oil obtained was purified by chromatography on silica gel using 95:5 hexanes:Et<sub>2</sub>O as the eluent to afford the product as a yellow oil (1.4 g, 69% yield). IR (thin film): 2952, 2833, 1610, 1500 cm<sup>-1</sup>; <sup>1</sup>H NMR (500 MHz, CDCl<sub>3</sub>) δ 7.10 (t, *J* = 8.1 Hz, 1H), 6.28 (dd, *J* = 8.4, 2.4 Hz, 1H), 6.14 (m, 2H), 3.79 (s, 3H), 2.91 (s, 3H), 2.84 (s, 2H), 0.09 (s, 9H); <sup>13</sup>C NMR (125 MHz, CDCl<sub>3</sub>) δ 160.8, 152.1, 129.7, 105.3, 100.2, 98.4, 55.3, 44.3, 40.4, -0.9. HRMS (ESI<sup>+</sup>) calc'd for [C<sub>12</sub>H<sub>21</sub>NOSi+H]<sup>+</sup> requires *m/z* 224.1467, found *m/z* 224.1466.

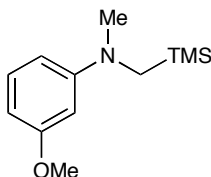

**2-Fluoro-*N*-methyl-*N*-((trimethylsilyl)methyl)aniline.** (Table 2, entry 8). Followed procedure B. The crude oil obtained was purified by chromatography on silica gel using 30:1 hexanes:EtOAc as the eluent to afford the product as a yellow oil (315 mg, 50% yield). IR (thin film): 2955, 2786, 1611, 1501 cm<sup>-1</sup>; <sup>1</sup>H NMR (500 MHz, CDCl<sub>3</sub>) δ 7.04–6.88 (m, 3H), 6.84–6.78 (m, 1H), 2.82 (s, 3H), 2.75 (s, 2H), 0.06 (s, 9H); <sup>13</sup>C NMR (125 MHz, CDCl<sub>3</sub>) δ 155.5 (*J* = 243.8 Hz), 142.4 (*J* = 8.8 Hz), 124.3 (*J* = 3.8 Hz), 120.8 (*J* = 7.5 Hz), 119.1 (*J* = 3.8 Hz), 116.3 (*J* = 21.3 Hz), 47.4 (*J* = 3.8 Hz), 43.6 (*J* = 2.5 Hz), -0.9. HRMS (ESI<sup>+</sup>) calc'd for [C<sub>11</sub>H<sub>18</sub>FNSi+H]<sup>+</sup> requires *m/z* 212.1266, found *m/z* 212.1262.

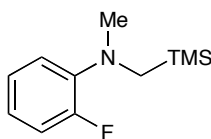

**1-((Trimethylsilyl)methyl)-1,2,3,4-tetrahydroquinoline** (Table 2, entry 9). Followed procedure B. The crude oil obtained was purified by chromatography on silica gel using 95:5 hexanes:Et<sub>2</sub>O as the eluent to afford the product as a yellow oil (420 mg, 64% yield). IR (thin film): 3028, 2950, 2840, 1601, 1504 cm<sup>-1</sup>; <sup>1</sup>H NMR (500 MHz, CDCl<sub>3</sub>) δ 7.10 (t, *J* = 8.1 Hz, 1H), 7.02 (d, *J* = 7.3 Hz, 1H), 6.90 (d, *J* = 7.1 Hz, 1H), 6.53 – 6.44 (m, 2H), 3.26 – 3.20 (m, 3H), 2.79 – 2.68 (m, 4H), 1.99 – 1.89 (m, 2H), 0.10 (s, 9H); <sup>13</sup>C NMR (125 MHz, CDCl<sub>3</sub>) δ 146.8, 128.9, 122.1, 122.1, 114.8, 110.7, 51.7, 42.7, 28.4, 22.6, -0.8. HRMS (ESI<sup>+</sup>) calc'd for [C<sub>13</sub>H<sub>21</sub>NSi+H]<sup>+</sup> requires *m/z* 220.1517, found *m/z* 220.1521.

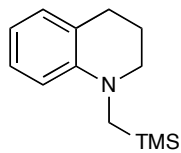

***N*-Phenyl-*N*-((trimethylsilyl)methyl)aniline** (Table 2, entry 11). Followed procedure B. The crude oil obtained was purified by chromatography on silica gel using 30:1 hexanes:EtOAc as the eluent to afford the product as a yellow oil (678 mg, 89% yield). IR (thin film): 2952, 2895, 1914, 1588, 1494 cm<sup>-1</sup>; <sup>1</sup>H NMR (500 MHz, CDCl<sub>3</sub>) δ 7.45 – 7.37 (m, 4H), 7.16 (dt, *J* = 7.9, 1.1 Hz, 4H), 7.11 – 7.05 (m, 2H), 3.47 (s, 2H), 0.12 (s, 9H); <sup>13</sup>C NMR (125 MHz, CDCl<sub>3</sub>) δ 149.7, 129.3, 121.3, 43.8, -1.1. HRMS (ESI<sup>+</sup>) calc'd for [C<sub>16</sub>H<sub>21</sub>NSi+H]<sup>+</sup> requires *m/z* 256.1517, found *m/z* 256.1520.

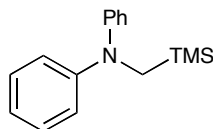

***N*-Benzyl-*N*-((trimethylsilyl)methyl)aniline** (Table 2, entry 12). Followed procedure B. The crude oil obtained was purified by chromatography on silica gel using 30:1 hexanes:EtOAc as the eluent to afford the product as a yellow oil (687 mg, 85% yield). IR (thin film): 2952, 2895, 1598, 1551, 1353 cm<sup>-1</sup>; <sup>1</sup>H NMR (500 MHz, CDCl<sub>3</sub>) δ 7.49 (d, *J* = 7.6 Hz, 2H), 7.44 – 7.32 (m, 5H), 6.88 – 6.76 (m, 3H), 4.73 (s, 2H), 3.17 (s, 2H), 0.27 (s, 9H); <sup>13</sup>C NMR (125 MHz, CDCl<sub>3</sub>) δ 149.8, 138.9, 129.2, 128.7, 126.9, 115.5, 112.2, 55.9, 42.5, -0.8. HRMS (ESI<sup>+</sup>) calc'd for [C<sub>17</sub>H<sub>23</sub>NSi+H]<sup>+</sup> requires *m/z* 270.1673, found *m/z* 270.1675.

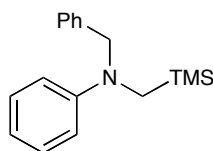

***N*-Isopropyl-*N*-((trimethylsilyl)methyl)aniline** (Table 2, entry 13). Followed procedure B. The crude oil obtained was purified by chromatography on silica gel using 30:1 hexanes:EtOAc as the eluent to afford the product as a yellow oil (571 mg, 86% yield). IR (thin film): 2966, 2806, 1549, 1502, 1196; <sup>1</sup>H NMR (500 MHz, CDCl<sub>3</sub>) δ 7.29 (dd, *J* = 8.8, 7.1 Hz, 1H), 6.85 (d, *J* = 8.0 Hz, 1H), 6.77 (t, *J* = 7.2 Hz, 1H), 4.12 (hept, *J* = 6.6 Hz, 1H), 2.68 (s, 1H), 1.22 (d, *J* = 6.6 Hz, 3H), 0.12 (s, 5H); <sup>13</sup>C NMR (125 MHz, CDCl<sub>3</sub>) δ 15.4, 128.7, 116.3, 115.2, 52.0, 33.6, 19.5, -1.1. HRMS (ESI<sup>+</sup>) calc'd for [C<sub>13</sub>H<sub>23</sub>NSi+H]<sup>+</sup> requires *m/z* 222.1672, found *m/z* 222.1673.

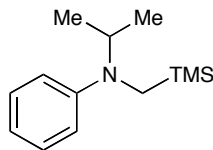

***tert*-Butyl phenyl((trimethylsilyl)methyl)carbamate** (Table 2, entry 14). Followed procedure B. The crude oil obtained was purified by chromatography on silica gel using 30:1 hexanes:EtOAc as the eluent to afford the product as a yellow oil (469 mg, 55% yield). IR (thin film): 2976, 2900, 1548, 1498, 1455 cm<sup>-1</sup>; <sup>1</sup>H NMR (500 MHz, CDCl<sub>3</sub>) δ 7.52 – 7.41 (m, 2H), 7.38 (m, 2H), 7.35 – 7.28 (m, 1H), 3.44 (s, 2H), 1.60 (s, 9H), 0.12 (s, 9H); <sup>13</sup>C NMR (125 MHz, CDCl<sub>3</sub>) δ 154.94, 144.25, 128.69, 126.91, 125.71, 80.05, 41.75, 28.57, -1.54. HRMS (ESI<sup>+</sup>) calc'd for [C<sub>15</sub>H<sub>25</sub>NO<sub>2</sub>Si+H]<sup>+</sup> requires *m/z* 280.1728, found *m/z* 280.1734.

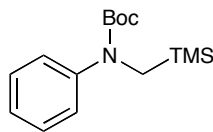

***N*-((Trimethylsilyl)methyl)aniline** (Scheme 2, 7)<sup>7</sup>. Aniline (23 mmol, 5 equiv) was added to a solution containing (iodomethyl)trimethylsilane (4.7 mmol, 1 equiv) in toluene (5 mL). The reaction mixture was stirred at 130 °C for 12 h and allowed to cool to room temperature. The reaction was then quenched with water and extracted with Et<sub>2</sub>O (3 x 5 mL). The combined organic layers were washed with brine and dried over MgSO<sub>4</sub>, filtered, and concentrated in vacuo. The crude oil obtained was purified by chromatography on silica gel using 20:1 hexanes:EtOAc as the eluent to afford the product as a yellow oil (228 mg, 27% yield). IR (thin film): 3052, 2895, 2800, 1641, 1443 cm<sup>-1</sup>; <sup>1</sup>H NMR (500 MHz, CDCl<sub>3</sub>) δ 7.18 (d, *J* = 8.4 Hz, 2H), 6.71 – 6.63 (m, 3H), 3.45 (s, 1H), 2.49 (s, 2H), 0.13 (s, 9H); <sup>13</sup>C NMR (125 MHz, CDCl<sub>3</sub>) δ 150.7, 129.3, 117.2, 112.6, 33.7, -2.4. HRMS (ESI<sup>+</sup>) calc'd for [C<sub>10</sub>H<sub>17</sub>NSi+H]<sup>+</sup> requires *m/z* 180.1204, found *m/z* 180.1207.

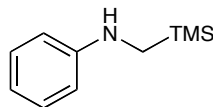

## B) Synthesis of acceptors

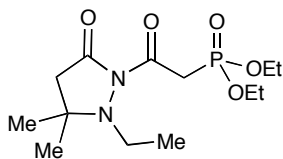

### Diethyl (2-(2-ethyl-3,3-dimethyl-5-oxopyrazolidin-1-yl)-2-oxoethyl) phosphonate (**11**).

A solution of 1-ethyl-5,5-dimethylpyrazolidin-3-one<sup>3</sup> (2 g, 14.1 mmol, 1 equiv) in THF (50 mL) was placed in a round bottomed flask and cooled to  $-78^{\circ}\text{C}$ . Butyllithium (1.6 M, 11.4 mL, 1.3 equiv) was added dropwise and the resulting dark orange solution was allowed to stir at  $-78^{\circ}\text{C}$  for 30 min. A solution of bromoacetyl bromide (1.8 mL, 21.1 mmol, 1.5 equiv) in THF (25 mL) was then added, and the mixture was allowed to warm to room temperature overnight. At that point, the reaction was quenched with saturated aqueous  $\text{NH}_4\text{Cl}$  (10 mL) and the organic layer was washed with saturated aqueous  $\text{NaHCO}_3$  (10 mL). The aqueous layer was then extracted with  $\text{Et}_2\text{O}$  (3 x 20 mL). The combined organic extracts were washed with water and brine, dried over  $\text{MgSO}_4$ , and concentrated. The crude residue was then dissolved in  $\text{P}(\text{OEt})_3$  (12 mL) and heated at  $50^{\circ}\text{C}$  overnight. The solution was allowed to cool, and excess triethylphosphite was distilled away under vacuum. The residue remaining in the pot was purified by flash chromatography on silica gel using 30:1 DCM:MeOH as the eluent to afford the product as an orange oil (3.1 g, 69% yield over two steps). IR (thin film): 2982, 2876, 1747, 1704, 1394  $\text{cm}^{-1}$ ;  $^1\text{H}$  NMR (500 MHz,  $\text{CDCl}_3$ )  $\delta$  4.27 – 4.04 (m, 4H), 3.80 (s, 1H), 3.76 (s, 1H), 3.02 (q,  $J = 7.1$  Hz, 2H), 2.63 (s, 2H), 1.38 – 1.24 (m, 12H), 1.12 (t,  $J = 7.1$  Hz, 3H);  $^{13}\text{C}$  NMR (125 MHz,  $\text{CDCl}_3$ )  $\delta$  175.42, 162.47, 62.72, 62.67, 60.30, 47.12, 43.93, 35.50, 34.47, 25.76, 16.37, 16.32, 12.60. HRMS (ESI<sup>+</sup>) calc'd for  $[\text{C}_{13}\text{H}_{25}\text{N}_2\text{O}_5\text{P}+\text{H}]^+$  requires  $m/z$  321.1574, found  $m/z$  321.1577.

**General Procedure A:** A suspension of NaH (149.8 mg, 3.7 mmol, 1.2 equiv) in THF (3 mL) was cooled to  $0^{\circ}\text{C}$ . A solution of phosphonate **11** (1 g, 3.1 mmol, 1 equiv) in THF (6 mL) was then added, and the resulting mixture was stirred for 30 min at  $0^{\circ}\text{C}$ . The aldehyde (9.4 mmol, 3 equiv) was then added in THF (3.5 mL), and the reaction was followed by TLC. After completion, the reaction was quenched with water, and the aqueous layer was extracted with  $\text{Et}_2\text{O}$  (x3). The combined organic extracts were washed with brine, dried over  $\text{MgSO}_4$  and concentrated. The crude residue was purified on silica gel by flash column chromatography.

**General Procedure B:** A solution of  $\text{KO}^t\text{Bu}$  (633 mg, 5.6 mmol, 1.2 equiv) in THF (15 mL) was cooled to  $-78^{\circ}\text{C}$ . A solution of phosphonate **11** (1.5 g, 4.7 mmol, 1 equiv) in THF (2 mL) was then added, and the resulting mixture was stirred for 30 min at  $-78^{\circ}\text{C}$ . The aldehyde (14 mmol, 3 equiv) was then added, and the reaction was followed by TLC. After completion, the reaction was quenched with saturated aqueous  $\text{NH}_4\text{Cl}$ , and the aqueous layer was extracted with  $\text{Et}_2\text{O}$  (x3). The combined organic extracts were washed with water and brine, dried over  $\text{MgSO}_4$ , and concentrated. The crude residue was purified on silica gel by flash column chromatography.

**(E)-1-Ethyl-2-(hex-2-enoyl)-5,5-dimethylpyrazolidin-3-one** (Table 3, entry 1) Followed procedure A. Reaction time was 2 h. The crude product was purified by chromatography on silica gel using 50:50 hexanes:  $\text{Et}_2\text{O}$  as the eluent to afford the product as a colorless oil (547 mg, 74% yield).

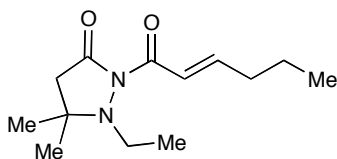

IR (thin film): 2964, 1739, 1686, 1635  $\text{cm}^{-1}$ ;  $^1\text{H}$  NMR (500 MHz,  $\text{CDCl}_3$ )  $\delta$  7.16 (dt,  $J = 15.3, 6.9$  Hz, 1H), 7.02 (d,  $J = 15.4$  Hz, 1H), 3.00 (q,  $J = 7.1$  Hz, 2H), 2.58 (s, 2H), 2.29 – 2.20 (m, 2H), 1.52 (h,  $J = 7.4$  Hz, 2H), 1.32 (s, 6H), 1.08 (t,  $J = 7.1$  Hz, 3H), 0.95 (t,  $J = 7.4$  Hz, 3H);  $^{13}\text{C}$  NMR (125 MHz,  $\text{CDCl}_3$ )  $\delta$  175.1, 164.1, 151.1, 121.5, 60.5, 47.3, 44.0, 34.7, 25.8, 21.4, 13.7, 12.8. HRMS (ESI<sup>+</sup>) calc'd for  $[\text{C}_{13}\text{H}_{22}\text{N}_2\text{O}_2+\text{H}]^+$  requires  $m/z$  239.1755, found  $m/z$  239.1756.

**(E)-1-Ethyl-5,5-dimethyl-2-(4-methylpent-2-enoyl)pyrazolidin-3-one** (Table 3, entry 2). Followed procedure A. Reaction time was 2 h. The crude product was purified by chromatography on silica gel using 50:50 hexanes:  $\text{Et}_2\text{O}$  as the eluent to afford the product as a colorless oil (473 mg, 64% yield).

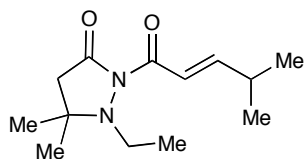

IR (thin film): 2968, 1740, 1684, 1633  $\text{cm}^{-1}$ ;  $^1\text{H}$  NMR (500 MHz,  $\text{CDCl}_3$ )  $\delta$  7.13 (dd,  $J = 15.5, 6.7$  Hz, 1H), 6.99 (dd,  $J = 15.5, 1.2$  Hz, 1H), 3.00 (q,  $J = 7.1$  Hz, 2H), 2.59 (s, 2H), 2.53 (dq,  $J = 13.5, 6.8, 1.3$  Hz, 2H), 1.32 (s, 6H), 1.09 (d,  $J = 6.8$  Hz, 6H), 1.08 (t,  $J = 7.1$  Hz, 3H);  $^{13}\text{C}$  NMR (125 MHz,  $\text{CDCl}_3$ )  $\delta$  175.1, 164.4, 157.2, 118.9, 60.5, 47.3, 44.1, 31.5,

25.8, 21.4, 12.8. HRMS (ESI<sup>+</sup>) calc'd for [C<sub>13</sub>H<sub>22</sub>N<sub>2</sub>O<sub>2</sub>+H]<sup>+</sup> requires *m/z* 239.1755, found *m/z* 239.1751.

**(E)-2-(4-(Benzyloxy)but-2-enoyl)-1-ethyl-5,5-dimethylpyrazolidin-3-one** (Table 3, entry 3). Followed procedure A. Reaction time was 2 h. The crude product was purified by chromatography on silica gel using 30:70 hexanes: Et<sub>2</sub>O as the eluent to afford the product as a colorless oil (588 mg, 60% yield). IR (thin film): 2973, 1739, 1686, 1641 cm<sup>-1</sup>; <sup>1</sup>H NMR (500 MHz, CDCl<sub>3</sub>) δ 7.40 – 7.27 (m, 6H), 7.16 (dt, *J* = 15.5, 4.3 Hz, 1H), 4.60 (s, 2H), 4.24 (dd, *J* = 4.3, 1.9 Hz, 2H), 3.01 (q, *J* = 7.1 Hz, 2H), 2.59 (s, 2H), 1.32 (s, 6H), 1.08 (t, *J* = 7.1 Hz, 3H); <sup>13</sup>C NMR (125 MHz, CDCl<sub>3</sub>) δ 175.1, 163.7, 145.7, 137.8, 128.5, 127.8, 127.7, 121.5, 72.8, 69.1, 60.6, 47.3, 43.9, 25.8, 12.8. HRMS (ESI<sup>+</sup>) calc'd for [C<sub>14</sub>H<sub>24</sub>N<sub>2</sub>O<sub>2</sub>+H]<sup>+</sup> requires *m/z* 317.1860, found *m/z* 317.1862.

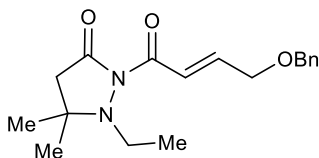

**(E)-2-(4,4-Dimethylpent-2-enoyl)-1-ethyl-5,5-dimethylpyrazolidin-3-one** (Table 3, entry 4). Followed procedure A. Reaction time was 2 h. The crude product was purified by chromatography on silica gel using 50:50 hexanes: Et<sub>2</sub>O as the eluent to afford the product as a colorless oil (464 mg, 59% yield). IR (thin film): 2963, 1740, 1688, 1631 cm<sup>-1</sup>; <sup>1</sup>H NMR (500 MHz, CDCl<sub>3</sub>) δ 7.16 (d, *J* = 15.6 Hz, 1H), 6.97 (d, *J* = 15.6 Hz, 1H), 3.01 (q, *J* = 7.1 Hz, 2H), 2.59 (s, 2H), 1.32 (s, 6H), 1.11 (s, 9H), 1.08 (t, *J* = 7.1 Hz, 3H); <sup>13</sup>C NMR (125 MHz, CDCl<sub>3</sub>) δ 175.2, 164.6, 160.7, 117.0, 60.5, 47.3, 44.1, 34.3, 28.8, 25.8, 12.8. HRMS (ESI<sup>+</sup>) calc'd for [C<sub>14</sub>H<sub>24</sub>N<sub>2</sub>O<sub>2</sub>+H]<sup>+</sup> requires *m/z* 253.1911, found *m/z* 239.1915.

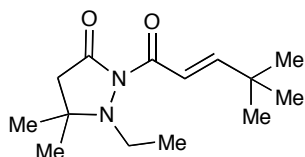

**(E)-2-Cinnamoyl-1-ethyl-5,5-dimethylpyrazolidin-3-one**. (Table 3, entry 5). Followed procedure B. Reaction time was 1 h. The crude was purified by chromatography on silica gel using 70:30 hexanes: EtOAc as the eluent to afford the product as a yellow solid (834 mg, 66% yield). IR (thin film): 3006, 1740, 1698, 1654 cm<sup>-1</sup>; <sup>1</sup>H NMR (500 MHz, CDCl<sub>3</sub>) δ 7.88 (d, *J* = 15.7 Hz, 1H), 7.70 (d, *J* = 15.8 Hz, 1H), 7.64 – 7.58 (m, 2H), 7.39 (dd, *J* = 4.9, 1.9 Hz, 3H), 3.05 (q, *J* = 7.1 Hz, 2H), 2.63 (s, 2H), 1.35 (s, 6H), 1.12 (t, *J* = 7.1 Hz, 3H); <sup>13</sup>C NMR (125 MHz, CDCl<sub>3</sub>) δ 175.2, 164.2, 145.9, 134.9, 130.4, 128.9, 128.5, 118.3, 60.6, 47.4, 44.1, 25.8, 12.8. HRMS (ESI<sup>+</sup>) calc'd for [C<sub>16</sub>H<sub>20</sub>N<sub>2</sub>O<sub>2</sub>+H]<sup>+</sup> requires *m/z* 273.1598, found *m/z* 273.1593. (mp = 55–56 °C).

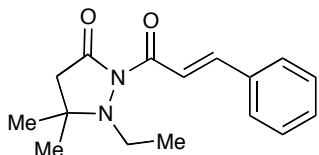

**(E)-2-(3-(4-Chlorophenyl)acryloyl)-1-ethyl-5,5-dimethylpyrazolidin-3-one**. (Table 3, entry 6). Followed procedure B. Reaction time was 1 h. The crude was purified by chromatography on silica gel using 60:40 hexanes: EtOAc as the eluent to afford the product as a yellow solid (820 mg, 59% yield). IR (thin film): 2978, 1724, 1685, 1592, 1326 cm<sup>-1</sup>; <sup>1</sup>H NMR (500 MHz, CDCl<sub>3</sub>) δ 7.82 (d, *J* = 15.7 Hz, 1H), 7.68 (d, *J* = 15.7 Hz, 1H), 7.54 (d, *J* = 8.5 Hz, 2H), 7.36 (d, *J* = 8.5 Hz, 2H), 3.05 (q, *J* = 7.1 Hz, 2H), 2.63 (s, 2H), 1.35 (s, 6H), 1.11 (t, *J* = 7.1 Hz, 3H). <sup>13</sup>C NMR (125 MHz, CDCl<sub>3</sub>) δ 175.3, 163.9, 144.4, 136.3, 133.4, 129.6, 129.1, 118.9, 60.6, 47.4, 44.0, 25.8, 12.8. HRMS (ESI<sup>+</sup>) calc'd for [C<sub>16</sub>H<sub>19</sub>ClN<sub>2</sub>O<sub>2</sub>+H]<sup>+</sup> requires *m/z* 307.1208, found *m/z* 307.1200. (mp = 82–85 °C).

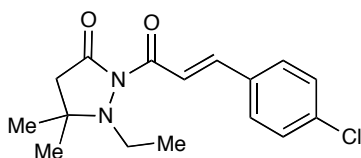

**(E)-1-Ethyl-2-(3-(4-methoxyphenyl)acryloyl)-5,5-dimethylpyrazolidin-3-one**. (Table 3, entry 7). Followed procedure B. Reaction time was 12 h. The crude was purified by chromatography on silica gel using 70:30 hexanes: EtOAc as the eluent to afford the product as a yellow oil (795 mg, 57% yield). IR (thin film): 2976, 1741, 1682, 1601, 1573, 1173 cm<sup>-1</sup>; <sup>1</sup>H NMR (500 MHz, CDCl<sub>3</sub>) δ 7.85 (d, *J* = 15.7 Hz, 1H), 7.63 – 7.52 (m, 3H), 6.96 – 6.87 (m, 2H), 3.84 (s, 3H), 3.04 (q, *J* = 7.1 Hz, 2H), 2.62 (s, 2H), 1.35 (s, 6H), 1.11 (t, *J* = 7.1 Hz, 3H); <sup>13</sup>C NMR (125 MHz, CDCl<sub>3</sub>) δ 175.2, 164.5, 161.5, 145.8, 130.2, 127.7, 115.8, 114.3, 60.6, 55.4, 47.4, 44.1, 25.8, 12.8. HRMS (ESI<sup>+</sup>) calc'd for [C<sub>17</sub>H<sub>22</sub>N<sub>2</sub>O<sub>3</sub>+H]<sup>+</sup> requires *m/z* 303.1704, found *m/z* 303.1713. (mp = 79–81 °C).

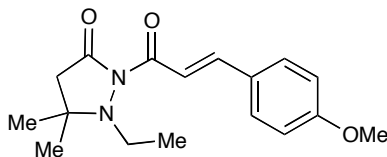

**(E)-1-Ethyl-5,5-dimethyl-2-(3-(*o*-tolyl)acryloyl)pyrazolidin-3-one.** (Table 3, entry 8). Followed procedure B. Reaction time was 3 h. The crude was purified by chromatography on silica gel using 70:30 hexanes: EtOAc as the eluent to afford the product as a yellow oil (833 mg, 62% yield). IR (thin film): 2977, 1743, 1617, 1327, 1230  $\text{cm}^{-1}$ ;  $^1\text{H}$  NMR (500 MHz,  $\text{CDCl}_3$ )  $\delta$  8.15 (d,  $J = 15.7$  Hz, 1H), 7.66 (d,  $J = 7.4$  Hz, 1H), 7.61 (d,  $J = 15.6$  Hz, 1H), 7.32 – 7.25 (m, 1H), 7.25 – 7.17 (m, 2H), 3.05 (q,  $J = 7.1$  Hz, 2H), 2.62 (s, 2H), 2.47 (s, 3H), 1.35 (s, 6H), 1.12 (t,  $J = 7.1$  Hz, 3H);  $^{13}\text{C}$  NMR (125 MHz,  $\text{CDCl}_3$ )  $\delta$  175.2, 164.2, 143.5, 138.1, 133.8, 130.8, 130.1, 126.9, 126.3, 119.3, 60.6, 47.4, 44.0, 25.8, 19.9, 12.9. HRMS ( $\text{ESI}^+$ ) calc'd for  $[\text{C}_{17}\text{H}_{22}\text{N}_2\text{O}_2+\text{H}]^+$  requires  $m/z$  287.1755, found  $m/z$  287.1756.

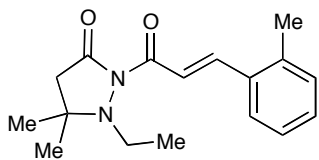

**(E)-1-Ethyl-2-(3-(furan-3-yl)acryloyl)-5,5-dimethylpyrazolidin-3-one.** (Table 3, entry 9). Followed procedure B. Reaction time was 30 min. The crude was purified by chromatography on silica gel using 70:30 hexanes: EtOAc as the eluent to afford the product as a yellow oil (570 mg, 47% yield). IR (thin film): 2972, 1742, 1685, 1324, 1232  $\text{cm}^{-1}$ ;  $^1\text{H}$  NMR (500 MHz,  $\text{CDCl}_3$ )  $\delta$  7.71 (d,  $J = 15.6$  Hz, 1H), 7.66 – 7.57 (m, 1H), 7.40 – 7.29 (m, 2H), 6.62 (d,  $J = 1.9$  Hz, 1H), 2.97 (q,  $J = 7.2$  Hz, 2H), 2.55 (s, 2H), 1.27 (s, 7H), 1.03 (t,  $J = 7.1$  Hz, 3H);  $^{13}\text{C}$  NMR (125 MHz,  $\text{CDCl}_3$ )  $\delta$  174.2, 163.1, 144.1, 143.3, 135.0, 122.2, 116.9, 106.7, 59.5, 46.3, 43.1, 24.8, 11.8. HRMS ( $\text{ESI}^+$ ) calc'd for  $[\text{C}_{14}\text{H}_{18}\text{N}_2\text{O}_3+\text{H}]^+$  requires  $m/z$  263.1391, found  $m/z$  263.1389.

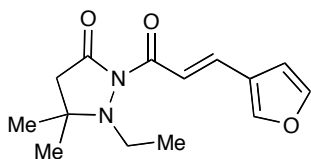

#### IV. Photochemical Reactions

**General procedure for asymmetric  $\alpha$ -amino radical addition:** A dry 25 mL Schlenk tube was charged with  $\text{Ru}(\text{bpy})_3\text{Cl}_2 \cdot 6\text{H}_2\text{O}$  (0.02 equiv.),  $\text{Sc}(\text{OTf})_3$  (0.15 equiv.), ligand (0.20 equiv.), and TBACl (0.30 equiv.). A solution containing the amine (1 equiv.) and the acceptor (1.5 equiv.) in acetonitrile (0.05 M) was then added. The reaction was degassed by 3 freeze/pump/thaw cycles under nitrogen in the dark. The reaction was then allowed to stir while being irradiated by a 23 W (1280 lumen) compact fluorescent lamp at a distance of 30 cm. Upon completion of the reaction, the solvent was removed by rotary evaporation, and the crude residue loaded directly onto silica for purification by flash column chromatography.

**(S)-1-Ethyl-5,5-dimethyl-2-(3-methyl-4-(methyl(phenyl)amino)butanoyl)pyrazolidin-3-one** (Table 2, entry 1, **3b**). Experiment 1: Prepared according to the general procedure using 98 mg (0.50 mmol) of *N*-methyl-*N*-((trimethylsilyl)methyl)aniline, 158 mg (0.75 mmol) of (*E*)-2-(but-2-enoyl)-1-ethyl-5,5-dimethylpyrazolidin-3-one, 7.5 mg (0.01 mmol)  $\text{Ru}(\text{bpy})_3\text{Cl}_2 \cdot 6\text{H}_2\text{O}$ , 37 mg  $\text{Sc}(\text{OTf})_3$  (0.075 mmol), 33 mg (0.10 mmol) (*S*)-*i*BuPyBox, 42 mg (0.15 mmol) TBACl, 10 mL acetonitrile and irradiated for 6 h. Purified by chromatography using 70:30 hexanes:EtOAc to yield 140 mg (0.42 mmol, 84% yield) of product

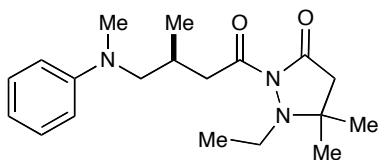

(93% ee) as a colorless oil. Experiment 2: 97 mg (0.50 mmol) of *N*-methyl-*N*-((trimethylsilyl)methyl)aniline, 158 mg (0.75 mmol) of (*E*)-2-(but-2-enoyl)-1-ethyl-5,5-dimethylpyrazolidin-3-one, 7.5 mg (0.01 mmol)  $\text{Ru}(\text{bpy})_3\text{Cl}_2 \cdot 6\text{H}_2\text{O}$ , 37 mg  $\text{Sc}(\text{OTf})_3$  (0.075 mmol), 33 mg (0.1 mmol) (*S*)-*i*BuPyBox, 42 mg (0.15 mmol) TBACl, 10 mL acetonitrile. Isolated 148 mg (0.45 mmol, 89% yield), 92% ee. [Daicel Chiracel OD-H, 8% MeOH, 3 mL/min, 249 nm;  $t_1 = 5.75$  min,  $t_2 = 6.49$  min],  $[\alpha]_D^{22} -4.7$  (c0.885,  $\text{CH}_2\text{Cl}_2$ ). IR (thin film): 2972, 2874, 1744, 1507  $\text{cm}^{-1}$ ;  $^1\text{H}$  NMR (500 MHz,  $\text{CDCl}_3$ )  $\delta$  7.22 (td,  $J = 8.8, 7.2$  Hz, 2H), 6.77 (d,  $J = 8.8$  Hz, 2H), 6.67 (t,  $J = 7.2$  Hz, 1H), 3.40 (dd,  $J = 14.5, 6.6$  Hz, 1H), 3.04 (t,  $J = 3.8, 3.0$  Hz, 1H), 3.01 – 2.93 (m, 6H), 2.73 (dd,  $J = 16.6, 7.2$  Hz, 1H), 2.57 (s, 3H), 1.29 (d,  $J = 9.0$  Hz, 6H), 1.06 (t,  $J = 7.2$  Hz, 3H), 1.01 (d,  $J = 6.7$  Hz, 3H);  $^{13}\text{C}$  NMR (125 MHz,  $\text{CDCl}_3$ )  $\delta$  175.2, 170.2, 149.6, 129.1, 115.9, 112.1, 60.4, 59.1, 47.0, 44.0, 40.9, 39.4, 29.0, 18.0, 12.8. HRMS ( $\text{ESI}^+$ ) calc'd for  $[\text{C}_{19}\text{H}_{29}\text{N}_3\text{O}_2+\text{H}]^+$  requires  $m/z$  332.2333, found  $m/z$  332.2328.

**(S)-1-Ethyl-2-(4-((4-fluorophenyl)(methyl)amino)-3-methylbutanoyl)-5,5-dimethylpyrazolidin-3-one**

(Table 2, entry 2). Experiment 1: Prepared according to the general procedure using 106 mg (0.50 mmol) of 4-fluoro-*N*-methyl-*N*-((trimethylsilyl)methyl)aniline, 158 mg (0.75 mmol) of (*E*)-2-(but-2-enoyl)-1-ethyl-5,5-dimethylpyrazolidin-3-one, 7.5 mg (0.01 mmol) Ru(bpy)<sub>3</sub>Cl<sub>2</sub>·6H<sub>2</sub>O, 37 mg Sc(OTf)<sub>3</sub> (0.075 mmol), 33 mg (0.10 mmol) (*S*)-*i*BuPyBox, 42 mg (0.15 mmol) TBACl, 10 mL acetonitrile and irradiated for 6 h. Purified by chromatography using 70:30 hexanes:EtOAc to yield 164 mg (0.47 mmol, 94% yield) of product (93% ee) as a colorless oil. Experiment

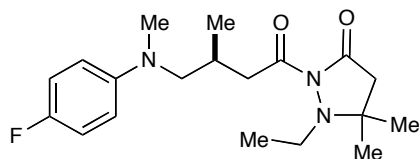

2: 106 mg (0.50 mmol) of 4-fluoro-*N*-methyl-*N*-((trimethylsilyl)methyl)aniline, 158 mg (0.75 mmol) of (*E*)-2-(but-2-enoyl)-1-ethyl-5,5-dimethylpyrazolidin-3-one, 7.5 mg (0.01 mmol) Ru(bpy)<sub>3</sub>Cl<sub>2</sub>·6H<sub>2</sub>O, 37 mg Sc(OTf)<sub>3</sub> (0.075 mmol), 33 mg (0.1 mmol) (*S*)-*i*BuPyBox, 42 mg (0.15 mmol) TBACl, 10 mL acetonitrile. Isolated 162 mg (0.46 mmol, 93% yield), 94% ee. [Daicel Chiracel AD-H, 5 to 50% MeOH, 3 mL/min, 249 nm; *t*<sub>1</sub> = 4.84 min, *t*<sub>2</sub> = 5.15 min]. [α]<sub>D</sub><sup>22</sup> -2.7 (c0.962, CH<sub>2</sub>Cl<sub>2</sub>). IR (thin film): 2972, 2874, 1744, 1707, 1514 cm<sup>-1</sup>; <sup>1</sup>H NMR (500 MHz, CDCl<sub>3</sub>) δ 6.96 – 6.87 (m, 2H), 6.73 – 6.65 (m, 2H), 3.35 (dd, *J* = 14.4, 6.6 Hz, 1H), 2.97 (m, 4H), 2.91 (s, 3H), 2.72 (dd, *J* = 16.7, 6.9 Hz, 1H), 2.62 – 2.50 (m, 3H), 1.29 (d, *J* = 10.7 Hz, 6H), 1.06 (t, *J* = 7.1 Hz, 3H), 1.01 (d, *J* = 6.7 Hz, 3H); <sup>13</sup>C NMR (125 MHz, CDCl<sub>3</sub>) δ 175.3, 170.3, 155.2 (*J* = 233.7 Hz), 146.5 (*J* = 1.3 Hz), 115.4 (*J* = 21.3 Hz), 113.2 (*J* = 6.3 Hz), 60.4, 60.0, 47.0, 44.1, 40.9, 39.8, 28.9, 25.8, 25.7, 18.1, 12.8. HRMS (ESI<sup>+</sup>) calc'd for [C<sub>19</sub>H<sub>28</sub>FN<sub>3</sub>O<sub>2</sub>+H]<sup>+</sup> requires *m/z* 350.2239, found *m/z* 350.2236.

**(S)-2-(4-((4-chlorophenyl)(methyl)amino)-3-methylbutanoyl)-1-ethyl-5,5-dimethylpyrazolidin-3-one**

(Table 2, entry 3). Experiment 1: Prepared according to the general procedure using 115 mg (0.50 mmol) of 4-chloro-*N*-methyl-*N*-((trimethylsilyl)methyl)aniline, 158 mg (0.75 mmol) of (*E*)-2-(but-2-enoyl)-1-ethyl-5,5-dimethylpyrazolidin-3-one, 7.5 mg (0.01 mmol) Ru(bpy)<sub>3</sub>Cl<sub>2</sub>·6H<sub>2</sub>O, 37 mg Sc(OTf)<sub>3</sub> (0.075 mmol), 33 mg (0.10 mmol) (*S*)-*i*BuPyBox, 42 mg (0.15 mmol) TBACl, 10 mL acetonitrile and irradiated for 6 h. Purified by chromatography using 70:30 hexanes:EtOAc to yield 181 mg (0.49 mmol, 98% yield) of product (93% ee) as a colorless oil.

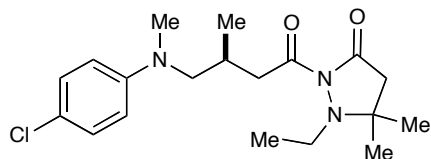

Experiment 2: 115 mg (0.50 mmol) of 4-chloro-*N*-methyl-*N*-((trimethylsilyl)methyl)aniline, 158 mg (0.75 mmol) of (*E*)-2-(but-2-enoyl)-1-ethyl-5,5-dimethylpyrazolidin-3-one, 7.5 mg (0.01 mmol) Ru(bpy)<sub>3</sub>Cl<sub>2</sub>·6H<sub>2</sub>O, 37 mg Sc(OTf)<sub>3</sub> (0.075 mmol), 33 mg (0.1 mmol) (*S*)-*i*BuPyBox, 42 mg (0.15 mmol) TBACl, 10 mL acetonitrile. Isolated 176 mg (0.48 mmol, 95% yield), 93% ee. [Daicel Chiracel AD-H, 5 to 50% MeOH, 3 mL/min, 249 nm; *t*<sub>1</sub> = 4.41 min, *t*<sub>2</sub> = 4.75 min]. [α]<sub>D</sub><sup>22</sup> -2.4 (c0.967, CH<sub>2</sub>Cl<sub>2</sub>). IR (thin film): 2972, 2935, 2874, 1745, 1706 cm<sup>-1</sup>; <sup>1</sup>H NMR (500 MHz, CDCl<sub>3</sub>) δ 7.14 (d, 2H), 6.68 (d, 2H), 3.41 (dd, *J* = 14.5, 6.4 Hz, 1H), 3.02 – 2.95 (m, 4H), 2.94 (s, 3H), 2.72 (dd, *J* = 16.7, 6.8 Hz, 1H), 2.57 (s, 3H), 1.29 (d, *J* = 9.2 Hz, 6H), 1.06 (t, *J* = 7.1 Hz, 3H), 1.00 (d, *J* = 6.7 Hz, 3H); <sup>13</sup>C NMR (125 MHz, CDCl<sub>3</sub>) δ 175.3, 170.2, 148.1, 128.8, 120.7, 113.2, 60.4, 59.1, 47.0, 44.1, 40.9, 39.6, 28.9, 25.7, 18.0, 12.8. HRMS (ESI<sup>+</sup>) calc'd for [C<sub>19</sub>H<sub>28</sub>ClN<sub>3</sub>O<sub>2</sub>+H]<sup>+</sup> requires *m/z* 366.1942, found *m/z* 366.1943.

**(S)-2-(4-((4-bromophenyl)(methyl)amino)-3-methylbutanoyl)-1-ethyl-5,5-dimethylpyrazolidin-3-one**

(Table 2, entry 4). Experiment 1: Prepared according to the general procedure using 138.3 mg (0.51 mmol) of 4-bromo-*N*-methyl-*N*-((trimethylsilyl)methyl)aniline, 158 mg (0.75 mmol) of (*E*)-2-(but-2-enoyl)-1-ethyl-5,5-dimethylpyrazolidin-3-one, 7.5 mg (0.01 mmol) Ru(bpy)<sub>3</sub>Cl<sub>2</sub>·6H<sub>2</sub>O, 37 mg Sc(OTf)<sub>3</sub> (0.075 mmol), 33 mg (0.10 mmol) (*S*)-*i*BuPyBox, 42 mg (0.15 mmol) TBACl, 10 mL acetonitrile and irradiated for 6 h. Purified by chromatography using 70:30 hexanes:EtOAc to yield 181.9 mg (0.44 mmol, 87% yield) of product (92% ee) as a colorless oil. Experiment 2: 136.1 mg (0.50

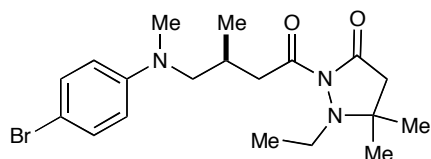

mmol) of 4-bromo-*N*-methyl-*N*-((trimethylsilyl)methyl)aniline, 158 mg (0.75 mmol) of (*E*)-2-(but-2-enoyl)-1-ethyl-5,5-dimethylpyrazolidin-3-one, 7.5 mg (0.01 mmol) Ru(bpy)<sub>3</sub>Cl<sub>2</sub>·6H<sub>2</sub>O, 37 mg Sc(OTf)<sub>3</sub> (0.075 mmol), 33 mg (0.1 mmol) (*S*)-*i*BuPyBox, 42 mg (0.15 mmol) TBACl, 10 mL acetonitrile. Isolated 190.7 mg (0.46 mmol, 93% yield), 92% ee. [Daicel Chiracel AD-H, 12% MeOH, 3 mL/min, 249 nm; *t*<sub>1</sub> = 4.45 min, *t*<sub>2</sub> = 5.16 min]. [α]<sub>D</sub><sup>22</sup> -2.9 (c1.155, CH<sub>2</sub>Cl<sub>2</sub>). IR (thin film): 2962, 1697, 1598, 1499 cm<sup>-1</sup>; <sup>1</sup>H NMR (500 MHz,



CDCl<sub>3</sub>)  $\delta$  7.27 (d,  $J$  = 9.0 Hz, 2H), 6.63 (d,  $J$  = 9.1 Hz, 2H), 3.41 (dd,  $J$  = 14.5, 6.4 Hz, 1H), 3.02 – 2.95 (m, 6H), 2.94 (s, 3H), 2.71 (dd,  $J$  = 16.6, 6.9 Hz, 1H), 2.60 – 2.50 (m, 3H), 1.29 (d,  $J$  = 8.9 Hz, 8H), 1.06 (t,  $J$  = 7.1 Hz, 4H), 1.00 (d,  $J$  = 6.7 Hz, 4H); <sup>13</sup>C NMR (125 MHz, CDCl<sub>3</sub>)  $\delta$  175.3, 170.1, 148.5, 131.7, 113.7, 107.8, 60.4, 59.0, 47.0, 44.0, 40.9, 39.6, 28.8, 25.8, 25.7, 18.0, 12.8. HRMS (ESI<sup>+</sup>) calc'd for [C<sub>19</sub>H<sub>28</sub>BrN<sub>3</sub>O<sub>2</sub>+H]<sup>+</sup> requires  $m/z$  410.1438, found  $m/z$  410.1443.

**(S)-1-Ethyl-5,5-dimethyl-2-(3-methyl-4-(methyl(p-tolyl)amino)butanoyl)pyrazolidin-3-one** (Table 2, entry 5). Experiment 1: Prepared according to the general procedure using 104 mg (0.50 mmol) of *N*-4-dimethyl-*N*-((trimethylsilyl)methyl)aniline, 158 mg (0.75 mmol) of (*E*)-2-(but-2-enoyl)-1-ethyl-5,5-dimethylpyrazolidin-3-one, 7.5 mg (0.01 mmol) Ru(bpy)<sub>3</sub>Cl<sub>2</sub>·6H<sub>2</sub>O, 37 mg Sc(OTf)<sub>3</sub> (0.075 mmol), 33 mg (0.10 mmol) (*S*)-*i*BuPyBox, 42 mg (0.15 mmol) TBACl, 10 mL acetonitrile and irradiated for 12 h. Purified by chromatography using 70:30 hexanes:EtOAc to yield 135 mg (0.39 mmol, 78% yield) of product (91% ee) as a colorless oil. Experiment 2: 104 mg (0.50 mmol) of *N*-4-dimethyl-*N*-((trimethylsilyl)methyl)aniline, 158 mg (0.75 mmol) of (*E*)-2-(but-2-enoyl)-1-ethyl-5,5-dimethylpyrazolidin-3-one, 7.5 mg (0.01 mmol) Ru(bpy)<sub>3</sub>Cl<sub>2</sub>·6H<sub>2</sub>O, 37 mg Sc(OTf)<sub>3</sub> (0.075 mmol), 33 mg (0.1 mmol) (*S*)-*i*BuPyBox, 42 mg (0.15 mmol) TBACl, 10 mL acetonitrile. Isolated 139 mg (0.40 mmol, 80% yield), 90% ee. [Daicel Chiracel AD-H, 5 to 50% *i*-PrOH, 3 mL/min, 249 nm;  $t_1$  = 4.65 min,  $t_2$  = 5.09 min]. [ $\alpha$ ]<sub>D</sub><sup>22</sup> -3.0 (c0.905, CH<sub>2</sub>Cl<sub>2</sub>). IR (thin film): 2972, 2872, 1744, 1708, 1568 cm<sup>-1</sup>; <sup>1</sup>H NMR (500 MHz, CDCl<sub>3</sub>)  $\delta$  7.03 (d,  $J$  = 8.2 Hz, 2H), 6.69 (d,  $J$  = 8.6 Hz, 2H), 3.33 (dd,  $J$  = 14.4, 6.7 Hz, 1H), 3.03 – 2.94 (m, 4H), 2.92 (s, 3H), 2.72 (dd,  $J$  = 16.5, 7.3 Hz, 1H), 2.61 – 2.52 (m, 3H), 2.24 (s, 3H), 1.29 (d,  $J$  = 9.4 Hz, 6H), 1.06 (t,  $J$  = 7.1 Hz, 3H), 1.00 (d,  $J$  = 6.7 Hz, 3H); <sup>13</sup>C NMR (125 MHz, CDCl<sub>3</sub>)  $\delta$  175.2, 170.3, 147.8, 129.6, 125.2, 112.5, 60.4, 59.5, 47.0, 44.1, 40.9, 39.4, 29.1, 20.2, 18.0, 12.8. HRMS (ESI<sup>+</sup>) calc'd for [C<sub>20</sub>H<sub>31</sub>N<sub>3</sub>O<sub>2</sub>+H]<sup>+</sup> requires  $m/z$  346.2490, found  $m/z$  346.2488.

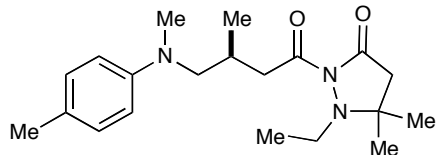

**(S)-1-Ethyl-2-(4-((3-methoxyphenyl)(methyl)amino)-3-methylbutanoyl)-5,5-dimethylpyrazolidin-3-one** (Table 2, entry 7). Experiment 1: Prepared according to the general procedure using 117.1 mg (0.50 mmol) of 3-methoxy-*N*-methyl-*N*-((trimethylsilyl)methyl)aniline, 158 mg (0.75 mmol) of (*E*)-2-(but-2-enoyl)-1-ethyl-5,5-dimethylpyrazolidin-3-one, 7.5 mg (0.01 mmol) Ru(bpy)<sub>3</sub>Cl<sub>2</sub>·6H<sub>2</sub>O, 37 mg Sc(OTf)<sub>3</sub> (0.075 mmol), 33 mg (0.10 mmol) (*S*)-*i*BuPyBox, 42 mg (0.15 mmol) TBACl, 10 mL acetonitrile and irradiated for 6 h. Purified by chromatography using 70:30 hexanes:EtOAc to yield 150.0 mg (0.41 mmol, 83% yield) of product (91% ee) as a colorless oil. Experiment 2: 117.8 mg (0.50 mmol) of 3-methoxy-*N*-methyl-*N*-((trimethylsilyl)methyl)aniline, 158 mg (0.75 mmol) of (*E*)-2-(but-2-enoyl)-1-ethyl-5,5-dimethylpyrazolidin-3-one, 7.5 mg (0.01 mmol) Ru(bpy)<sub>3</sub>Cl<sub>2</sub>·6H<sub>2</sub>O, 37 mg Sc(OTf)<sub>3</sub> (0.075 mmol), 33 mg (0.1 mmol) (*S*)-*i*BuPyBox, 42 mg (0.15 mmol) TBACl, 10 mL acetonitrile. Isolated 160.0 mg (0.44 mmol, 92% yield), 92% ee. [Daicel Chiracel OD-H, 5 to 50% MeOH, 3 mL/min, 249 nm;  $t_1$  = 5.33 min,  $t_2$  = 5.73 min]. [ $\alpha$ ]<sub>D</sub><sup>22</sup> -2.0 (c0.687, CH<sub>2</sub>Cl<sub>2</sub>). IR (thin film): 2970, 2874, 1744, 1707, 1610 cm<sup>-1</sup>; <sup>1</sup>H NMR (500 MHz, CDCl<sub>3</sub>)  $\delta$  7.12 (t,  $J$  = 8.2 Hz, 1H), 6.40 (dd,  $J$  = 8.4, 2.4 Hz, 1H), 6.32 – 6.22 (m, 2H), 3.80 (s, 3H), 3.39 (dd,  $J$  = 14.5, 6.6 Hz, 1H), 3.07 – 2.95 (m, 4H), 2.95 (s, 3H), 2.72 (dd,  $J$  = 16.4, 7.4 Hz, 1H), 2.57 (s, 3H), 1.29 (d,  $J$  = 7.5 Hz, 6H), 1.06 (t,  $J$  = 7.1 Hz, 3H), 1.00 (d,  $J$  = 6.7 Hz, 3H); <sup>13</sup>C NMR (125 MHz, CDCl<sub>3</sub>)  $\delta$  175.2, 170.2, 160.7, 151.0, 129.8, 105.3, 101.0, 98.4, 60.4, 59.0, 55.1, 47.0, 44.1, 40.9, 39.4, 29.1, 25.8, 25.7, 17.9, 12.8. HRMS (ESI<sup>+</sup>) calc'd for [C<sub>20</sub>H<sub>31</sub>N<sub>3</sub>O<sub>3</sub>+H]<sup>+</sup> requires  $m/z$  362.2439, found  $m/z$  362.2436.

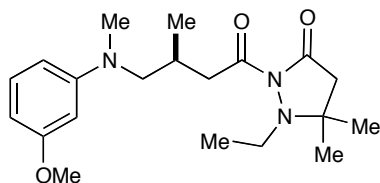

**(R)-1-Ethyl-2-(4-((2-fluorophenyl)(methyl)amino)-3-methylbutanoyl)-5,5-dimethylpyrazolidin-3-one** (Table 2, entry 8). Experiment 1: Prepared according to the general procedure using 107.1 mg (0.50 mmol) of 2-fluoro-*N*-methyl-*N*-((trimethylsilyl)methyl)aniline, 158 mg (0.75 mmol) of (*E*)-2-(but-2-enoyl)-1-ethyl-5,5-dimethylpyrazolidin-3-one, 7.5 mg (0.01 mmol) Ru(bpy)<sub>3</sub>Cl<sub>2</sub>·6H<sub>2</sub>O, 37 mg Sc(OTf)<sub>3</sub> (0.075 mmol), 33 mg (0.10 mmol) (*R*)-*i*BuPyBox, 42 mg (0.15 mmol) TBACl, 10 mL acetonitrile and irradiated for 6 h. Purified by chromatography using 70:30 hexanes:EtOAc to yield 144.2 mg (0.41 mmol, 81% yield)

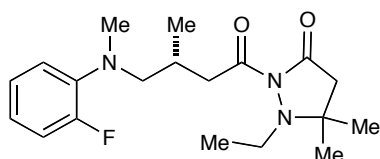

of product as a colorless oil. The enantiomeric excess of the product was determined to be -95% by conversion to the corresponding alcohol and analysis by SFC. Experiment 2: 107.0 mg (0.50 mmol) of 2-fluoro-*N*-methyl-*N*-((trimethylsilyl)methyl)aniline, 158 mg (0.75 mmol) of (*E*)-2-(but-2-enoyl)-1-ethyl-5,5-dimethylpyrazolidin-3-one, 7.5 mg (0.01 mmol) Ru(bpy)<sub>3</sub>Cl<sub>2</sub>·6H<sub>2</sub>O, 37 mg Sc(OTf)<sub>3</sub> (0.075 mmol), 33 mg (0.1 mmol) (*R*)-*i*BuPyBox, 42 mg (0.15 mmol) TBACl, 10 mL acetonitrile. Isolated 138.0 mg (0.39 mmol, 78% yield), -96% ee. [ $\alpha$ ]<sub>D</sub><sup>22</sup> -4.8 (c1.065, CH<sub>2</sub>Cl<sub>2</sub>). IR (thin film): 2972, 2933, 1745, 1706, 1503 cm<sup>-1</sup>; <sup>1</sup>H NMR (500 MHz, CDCl<sub>3</sub>)  $\delta$  7.05 – 6.91 (m, 3H), 6.87 – 6.76 (m, 1H), 3.13 – 3.03 (m, 2H), 2.99 (q, *J* = 7.1 Hz, 2H), 2.90 (dd, *J* = 13.2, 7.4 Hz, 1H), 2.82 (s, 3H), 2.72 (dd, *J* = 16.7, 7.9 Hz, 1H), 2.57 (s, 2H), 2.55 – 2.48 (m, 1H), 1.29 (d, *J* = 5.5 Hz, 6H), 1.07 (t, *J* = 7.1 Hz, 3H), 0.99 (d, *J* = 6.7 Hz, 3H); <sup>13</sup>C NMR (125 MHz, CDCl<sub>3</sub>)  $\delta$  175.1, 170.7, 155.1 (*J* = 244.7 Hz), 140.7 (*J* = 8.2 Hz), 124.2 (*J* = 3.5 Hz), 120.9 (*J* = 7.7 Hz), 119.2 (*J* = 3.4 Hz), 116.2 (*J* = 21.1 Hz), 61.2 (*J* = 4.1 Hz), 60.4, 47.1, 44.1, 40.9, 40.0 (*J* = 2.3 Hz), 28.2, 25.8 (*J* = 11.5 Hz), 12.8. HRMS (ESI<sup>+</sup>) calc'd for [C<sub>19</sub>H<sub>28</sub>FN<sub>3</sub>O<sub>2</sub>+H]<sup>+</sup> requires *m/z* 350.2239, found *m/z* 350.2236.

**(*S*)-2-(4-(3,4-Dihydroquinolin-1(2H)-yl)-3-methylbutanoyl)-1-ethyl-5,5-dimethylpyrazolidin-3-one**

(Table 2, entry 9) Experiment 1: Prepared according to the general procedure using 112.9 mg (0.51 mmol) of 1-((trimethylsilyl)methyl)-1,2,3,4-tetrahydroquinoline, 158 mg (0.75 mmol) of (*E*)-2-(but-2-enoyl)-1-ethyl-5,5-dimethylpyrazolidin-3-one, 7.5 mg (0.01 mmol) Ru(bpy)<sub>3</sub>Cl<sub>2</sub>·6H<sub>2</sub>O, 37 mg Sc(OTf)<sub>3</sub> (0.075 mmol), 33 mg (0.10 mmol) (*S*)-*i*BuPyBox, 42 mg (0.15 mmol) TBACl, 10 mL acetonitrile and irradiated for 12 h. Purified by chromatography using 70:30 hexanes:EtOAc to yield 147.5 mg (0.41 mmol, 80% yield)

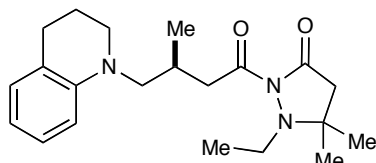

of product (90% ee) as a colorless oil. Experiment 2: 111.4 mg (0.50 mmol) of 1-((trimethylsilyl)methyl)-1,2,3,4-tetrahydroquinoline, 158 mg (0.75 mmol) of (*E*)-2-(but-2-enoyl)-1-ethyl-5,5-dimethylpyrazolidin-3-one, 7.5 mg (0.01 mmol) Ru(bpy)<sub>3</sub>Cl<sub>2</sub>·6H<sub>2</sub>O, 37 mg Sc(OTf)<sub>3</sub> (0.075 mmol), 33 mg (0.1 mmol) (*S*)-*i*BuPyBox, 42 mg (0.15 mmol) TBACl, 10 mL acetonitrile. Isolated 141.2 mg (0.39 mmol, 79% yield), 89% ee. [Daicel Chiracel AD-H, 5 to 50% *i*-PrOH, 3 mL/min, 249 nm; *t*<sub>1</sub> = 5.14 min, *t*<sub>2</sub> = 5.38 min]. [ $\alpha$ ]<sub>D</sub><sup>22</sup> -10.8 (c1.107, CH<sub>2</sub>Cl<sub>2</sub>). IR (thin film): 2968, 2873, 1744, 1706, 1601 cm<sup>-1</sup>; <sup>1</sup>H NMR (500 MHz, CDCl<sub>3</sub>)  $\delta$  7.04 (t, *J* = 7.7 Hz, 1H), 6.92 (d, *J* = 7.3 Hz, 1H), 6.71 (d, *J* = 8.3 Hz, 1H), 6.54 (t, *J* = 7.3 Hz, 1H), 3.38 – 3.24 (m, 3H), 3.05 – 2.89 (m, 4H), 2.79 – 2.68 (m, 3H), 2.64 – 2.52 (m, 3H), 1.98 – 1.87 (m, 2H), 1.29 (d, *J* = 6.5 Hz, 6H), 1.07 (t, *J* = 7.1 Hz, 3H), 1.03 (d, *J* = 6.7 Hz, 3H); <sup>13</sup>C NMR (125 MHz, CDCl<sub>3</sub>)  $\delta$  175.2, 170.3, 145.8, 129.1, 127.2, 122.0, 115.4, 111.1, 60.4, 58.1, 50.9, 47.0, 44.1, 41.0, 28.8, 28.2, 25.9, 25.7, 22.1, 18.0, 12.9. HRMS (ESI<sup>+</sup>) calc'd for [C<sub>27</sub>H<sub>31</sub>N<sub>3</sub>O<sub>2</sub>+H]<sup>+</sup> requires *m/z* 358.2490, found *m/z* 358.2484.

**(*R*)-2-(4-(Diphenylamino)-3-methylbutanoyl)-1-ethyl-5,5-dimethylpyrazolidin-3-one** (Table 2, entry 11).

Experiment 1: Prepared according to the general procedure using 128.0 mg (0.50 mmol) of *N*-phenyl-*N*-((trimethylsilyl)methyl)aniline, 158 mg (0.75 mmol) of (*E*)-2-(but-2-enoyl)-1-ethyl-5,5-dimethylpyrazolidin-3-one, 7.5 mg (0.01 mmol) Ru(bpy)<sub>3</sub>Cl<sub>2</sub>·6H<sub>2</sub>O, 37 mg Sc(OTf)<sub>3</sub> (0.075 mmol), 33 mg (0.10 mmol) (*R*)-*i*BuPyBox, 42 mg (0.15 mmol) TBACl, 10 mL acetonitrile and irradiated for 12 h. Purified by chromatography using 70:30 hexanes:EtOAc to yield 186.0 mg (0.47 mmol, 95% yield) of product as a colorless oil. The enantiomeric excess of the product was determined to be -91% by conversion to the

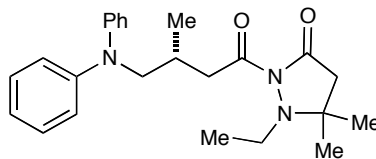

corresponding alcohol and analysis by SFC Experiment 2: 130.8 mg (0.51 mmol) of *N*-phenyl-*N*-((trimethylsilyl)methyl)aniline, 158 mg (0.75 mmol) of (*E*)-2-(but-2-enoyl)-1-ethyl-5,5-dimethylpyrazolidin-3-one, 7.5 mg (0.01 mmol) Ru(bpy)<sub>3</sub>Cl<sub>2</sub>·6H<sub>2</sub>O, 37 mg Sc(OTf)<sub>3</sub> (0.075 mmol), 33 mg (0.1 mmol) (*R*)-*i*BuPyBox, 42 mg (0.15 mmol) TBACl, 10 mL acetonitrile. Isolated 182.1 mg (0.46 mmol, 91% yield), -92% ee. [ $\alpha$ ]<sub>D</sub><sup>22</sup> 24.7 (c0.970, CH<sub>2</sub>Cl<sub>2</sub>). IR (thin film): 2971, 2873, 1743, 1589, 1495 cm<sup>-1</sup>; <sup>1</sup>H NMR (500 MHz, CDCl<sub>3</sub>)  $\delta$  7.28 – 7.21 (m, 4H), 7.08 – 7.02 (m, 4H), 6.96 – 6.89 (m, 2H), 3.83 (dd, *J* = 14.5, 6.1 Hz, 1H), 3.48 (dd, *J* = 14.5, 8.8 Hz, 1H), 3.06 – 2.94 (m, 3H), 2.78 (dd, *J* = 16.8, 7.1 Hz, 1H), 2.57 (d, *J* = 4.1 Hz, 3H), 1.29 (d, *J* = 2.4 Hz, 6H), 1.09 – 1.02 (m, 6H); <sup>13</sup>C NMR (125 MHz, CDCl<sub>3</sub>)  $\delta$  175.2, 170.2, 148.7, 129.2, 121.3, 121.3, 60.4, 58.2, 47.1, 44.0, 40.9, 28.7, 25.9, 25.7, 18.1, 12.9. HRMS (ESI<sup>+</sup>) calc'd for [C<sub>24</sub>H<sub>31</sub>N<sub>3</sub>O<sub>2</sub>+H]<sup>+</sup> requires *m/z* 394.2490, found *m/z* 394.2501.

**(S)-2-(4-(Benzyl(phenyl)amino)-3-methylbutanoyl)-1-ethyl-5,5-dimethylpyrazolidin-3-one** (Table 2, entry 12). Experiment 1: Prepared according to the general procedure using 135.7 mg (0.50 mmol) of *N*-benzyl-*N*-((trimethylsilyl)methyl)aniline, 158 mg (0.75 mmol) of (*E*)-2-(but-2-enoyl)-1-ethyl-5,5-dimethylpyrazolidin-3-one, 7.5 mg (0.01 mmol) Ru(bpy)<sub>3</sub>Cl<sub>2</sub>·6H<sub>2</sub>O, 37 mg Sc(OTf)<sub>3</sub> (0.075 mmol), 33 mg (0.10 mmol) (*S*)-*i*BuPyBox, 42 mg (0.15 mmol) TBACl, 10 mL acetonitrile and irradiated for 6 h. Purified by chromatography using 70:30 hexanes:EtOAc to yield 121.0 mg (0.30 mmol, 58% yield) of product as a colorless oil. The enantiomeric excess of the product was determined to be 93% by conversion to the corresponding alcohol and analysis by SFC Experiment 2: 135.0 mg (0.50 mmol) of *N*-benzyl-*N*-((trimethylsilyl)methyl)aniline, 158 mg (0.75 mmol) of (*E*)-2-(but-2-enoyl)-1-ethyl-5,5-dimethylpyrazolidin-3-one, 7.5 mg (0.01 mmol) Ru(bpy)<sub>3</sub>Cl<sub>2</sub>·6H<sub>2</sub>O, 37 mg Sc(OTf)<sub>3</sub> (0.075 mmol), 33 mg (0.1 mmol) (*S*)-*i*BuPyBox, 42 mg (0.15 mmol) TBACl, 10 mL acetonitrile. Isolated 123.8 mg (0.31 mmol, 61% yield), 95% ee. [ $\alpha$ ]<sub>D</sub><sup>22</sup> -5.5 (c1.050, CH<sub>2</sub>Cl<sub>2</sub>). IR (thin film): 3027, 2934, 2875, 1744, 1706 cm<sup>-1</sup>; <sup>1</sup>H NMR (500 MHz, CDCl<sub>3</sub>)  $\delta$  7.30 – 7.23 (m, 2H), 7.23 – 7.12 (m, 5H), 6.78 (d, *J* = 7.2 Hz, 2H), 6.65 (t, *J* = 7.2 Hz, 1H), 4.73 – 4.51 (m, 2H), 3.55 (dd, *J* = 14.6, 6.2 Hz, 1H), 3.18 (dd, *J* = 14.7, 8.4 Hz, 1H), 3.04 – 2.91 (m, 3H), 2.75 (dd, *J* = 16.5, 7.2 Hz, 1H), 2.72 – 2.62 (m, 1H), 2.56 (d, *J* = 1.4 Hz, 2H), 1.29 (d, *J* = 5.8 Hz, 6H), 1.09 – 1.01 (m, 6H); <sup>13</sup>C NMR (125 MHz, CDCl<sub>3</sub>)  $\delta$  175.2, 170.2, 148.6, 138.6, 129.1, 128.5, 126.6, 126.6, 116.2, 112.6, 60.4, 57.4, 55.0, 47.0, 44.0, 41.0, 28.9, 25.9, 25.7, 18.1, 12.8. HRMS (ESI<sup>+</sup>) calc'd for [C<sub>25</sub>H<sub>33</sub>N<sub>3</sub>O<sub>2</sub>+H]<sup>+</sup> requires *m/z* 408.2646, found *m/z* 408.2662.

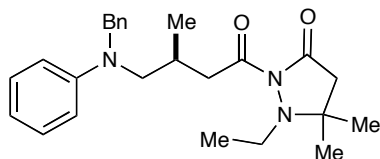

**(S)-1-Ethyl-2-(4-(isopropyl(phenyl)amino)-3-methylbutanoyl)-5,5-dimethylpyrazolidin-3-one** (Table 2, entry 13). Experiment 1: Prepared according to the general procedure using 110.8 mg (0.50 mmol) of *N*-isopropyl-*N*-((trimethylsilyl)methyl)aniline, 158 mg (0.75 mmol) of (*E*)-2-(but-2-enoyl)-1-ethyl-5,5-dimethylpyrazolidin-3-one, 7.5 mg (0.01 mmol) Ru(bpy)<sub>3</sub>Cl<sub>2</sub>·6H<sub>2</sub>O, 37 mg Sc(OTf)<sub>3</sub> (0.075 mmol), 33 mg (0.10 mmol) (*S*)-*i*BuPyBox, 42 mg (0.15 mmol) TBACl, 10 mL acetonitrile and irradiated for 12 h. Purified by chromatography using 70:30 hexanes:EtOAc to yield 62.8 mg (0.17 mmol, 35% yield) of product (95% ee) as a colorless oil. Experiment 2: 111.4 mg (0.50 mmol) of *N*-isopropyl-*N*-((trimethylsilyl)methyl)aniline, 158 mg (0.75 mmol) of (*E*)-2-(but-2-enoyl)-1-ethyl-5,5-dimethylpyrazolidin-3-one, 7.5 mg (0.01 mmol) Ru(bpy)<sub>3</sub>Cl<sub>2</sub>·6H<sub>2</sub>O, 37 mg Sc(OTf)<sub>3</sub> (0.075 mmol), 33 mg (0.1 mmol) (*S*)-*i*BuPyBox, 42 mg (0.15 mmol) TBACl, 10 mL acetonitrile. Isolated 56.1 mg (0.16 mmol, 31% yield), 95% ee. [Daicel Chiracel AD-H, 10% MeOH, 3 mL/min, 236 nm; *t*<sub>1</sub> = 5.10 min, *t*<sub>2</sub> = 5.58 min]. [ $\alpha$ ]<sub>D</sub><sup>22</sup> -31.5 (c1.200, CH<sub>2</sub>Cl<sub>2</sub>). IR (thin film): 2970, 2873, 1743, 1710, 1597 cm<sup>-1</sup>; <sup>1</sup>H NMR (500 MHz, CDCl<sub>3</sub>)  $\delta$  7.21 (d, *J* = 8.2 Hz, 2H), 6.92 (d, *J* = 8.2 Hz, 2H), 6.73 (t, *J* = 7.2 Hz, 1H), 3.99 (p, *J* = 6.7 Hz, 1H), 3.09 (dd, *J* = 14.2, 6.7 Hz, 1H), 3.04 – 2.94 (m, 3H), 2.85 (dd, *J* = 14.2, 8.2 Hz, 1H), 2.69 (dd, *J* = 16.7, 7.8 Hz, 1H), 2.57 (d, *J* = 2.8 Hz, 2H), 2.47 – 2.37 (m, 1H), 1.30 (s, 6H), 1.14 (dd, *J* = 10.8, 6.7 Hz, 6H), 1.07 (t, *J* = 7.1 Hz, 3H), 0.97 (d, *J* = 6.7 Hz, 3H); <sup>13</sup>C NMR (125 MHz, CDCl<sub>3</sub>)  $\delta$  175.2, 170.5, 149.6, 128.8, 117.7, 116.8, 60.4, 52.2, 49.0, 47.0, 44.1, 41.3, 27.8, 25.9, 25.6, 20.2, 19.8, 18.0, 12.9. HRMS (ESI<sup>+</sup>) calc'd for [C<sub>21</sub>H<sub>33</sub>N<sub>3</sub>O<sub>2</sub>+H]<sup>+</sup> requires *m/z* 360.2646, found *m/z* 360.2643.

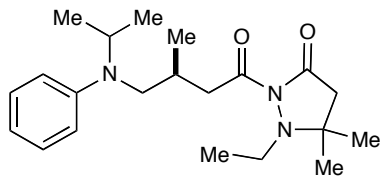

**(S)-1-Ethyl-5,5-dimethyl-2-(3-((methyl(phenyl)amino)methyl)hexanoyl)pyrazolidin-3-one** (Table 3, entry 1). Experiment 1: Prepared according to the general procedure using 97 mg (0.50 mmol) of *N*-methyl-*N*-((trimethylsilyl)methyl)aniline, 179 mg (0.75 mmol) of (*E*)-1-ethyl-2-(hex-2-enoyl)-5,5-dimethylpyrazolidin-3-one, 7.5 mg (0.01 mmol) Ru(bpy)<sub>3</sub>Cl<sub>2</sub>·6H<sub>2</sub>O, 37 mg Sc(OTf)<sub>3</sub> (0.075 mmol), 33 mg (0.10 mmol) (*S*)-*i*BuPyBox, 42 mg (0.15 mmol) TBACl, 10 mL acetonitrile and irradiated for 6 h. Purified by chromatography using 60:40 hexanes:Et<sub>2</sub>O to yield 137 mg (0.38 mmol, 76% yield) of product (93% ee) as a colorless oil. Experiment 2: 97 mg (0.50 mmol) of *N*-methyl-*N*-((trimethylsilyl)methyl)aniline, 179 mg (0.75 mmol) of (*E*)-1-ethyl-2-(hex-2-enoyl)-5,5-dimethylpyrazolidin-3-one, 7.5 mg (0.01 mmol) Ru(bpy)<sub>3</sub>Cl<sub>2</sub>·6H<sub>2</sub>O, 37 mg Sc(OTf)<sub>3</sub> (0.075 mmol), 33 mg (0.1 mmol) (*S*)-*i*BuPyBox, 42 mg (0.15 mmol) TBACl, 10 mL acetonitrile. Isolated 136 mg (0.38 mmol, 76% yield), 92% ee. [Daicel Chiracel AD-H, 5 to 50% MeOH, 3 mL/min, 249 nm; *t*<sub>1</sub> =

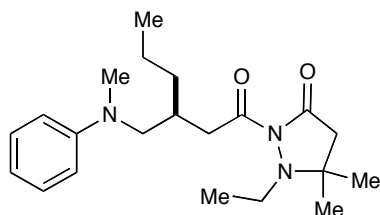

3.20 min,  $t_2 = 3.52$  min],  $[\alpha]_D^{22}$  0.8 (c0.968, CH<sub>2</sub>Cl<sub>2</sub>). IR (thin film): 2959, 2870, 1740, 1505 cm<sup>-1</sup>; <sup>1</sup>H NMR (500 MHz, CDCl<sub>3</sub>)  $\delta$  7.21 (dd,  $J = 8.8, 7.3$  Hz, 2H), 6.77 (d,  $J = 8.3$  Hz, 2H), 6.67 (t,  $J = 7.2$  Hz, 1H), 3.35 (dd,  $J = 14.4, 7.2$  Hz, 1H), 3.12 (dd,  $J = 14.4, 7.8$  Hz, 1H), 2.97 (q,  $J = 7.3$  Hz, 2H), 2.94 – 2.82 (m, 5H), 2.58 – 2.46 (m, 3H), 1.49 – 1.30 (m, 4H), 1.29 (s, 3H), 1.25 (s, 3H), 1.05 (t,  $J = 7.1$  Hz, 3H), 0.89 (t,  $J = 6.9$  Hz, 3H); <sup>13</sup>C NMR (125 MHz, CDCl<sub>3</sub>)  $\delta$  175.2, 170.6, 149.9, 129.1, 116.1, 112.3, 60.3, 57.5, 47.0, 44.1, 39.1, 38.4, 34.3, 33.3, 25.8, 20.0, 14.4, 12.8; HRMS (ESI<sup>+</sup>) calculated for [C<sub>21</sub>H<sub>33</sub>N<sub>3</sub>O<sub>2</sub>+H]<sup>+</sup> requires  $m/z$  360.2646, found  $m/z$  360.2651.

**(R)-1-Ethyl-5,5-dimethyl-2-(4-methyl-3-((methyl(phenyl)amino)methyl)pentanoyl)pyrazolidin-3-one** (Table 3, entry 2). Experiment 1: Prepared according to the general procedure using 97 mg (0.50 mmol)

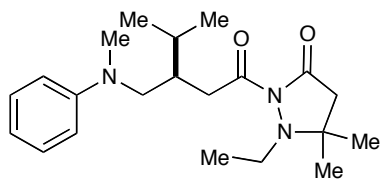

of *N*-methyl-*N*-((trimethylsilyl)methyl)aniline, 179 mg (0.75 mmol) of (*E*)-1-ethyl-5,5-dimethyl-2-(4-methylpent-2-enoyl)pyrazolidin-3-one, 7.5 mg (0.01 mmol) Ru(bpy)<sub>3</sub>Cl<sub>2</sub>·6H<sub>2</sub>O, 37 mg Sc(OTf)<sub>3</sub> (0.075 mmol), 33 mg (0.10 mmol) (*S*)-*i*BuPyBox, 42 mg (0.15 mmol) TBACl, 10 mL acetonitrile and irradiated for 6 h. Purified by chromatography using 60:40 hexanes:Et<sub>2</sub>O to yield 129 mg (0.36 mmol, 71% yield) of product (93% ee) as a colorless oil. Experiment 2: 97 mg (0.50 mmol) of *N*-methyl-*N*-((trimethylsilyl)methyl)aniline, 179 mg (0.75 mmol) of (*E*)-1-ethyl-5,5-dimethyl-2-(4-methylpent-2-enoyl)pyrazolidin-3-one, 7.5 mg (0.01 mmol) Ru(bpy)<sub>3</sub>Cl<sub>2</sub>·6H<sub>2</sub>O, 37 mg Sc(OTf)<sub>3</sub> (0.075 mmol), 33 mg (0.1 mmol) (*S*)-*i*BuPyBox, 42 mg (0.15 mmol) TBACl, 10 mL acetonitrile. Isolated 127 mg (0.35 mmol, 70% yield), 93% ee. [Daicel Chiracel AD-H, 5 to 50% MeOH, 3 mL/min, 249 nm;  $t_1 = 2.92$  min,  $t_2 = 3.32$  min],  $[\alpha]_D^{22}$  8.6 (c0.996, CH<sub>2</sub>Cl<sub>2</sub>). IR (thin film): 2960, 2872, 1741, 1506 cm<sup>-1</sup>; <sup>1</sup>H NMR (500 MHz, CDCl<sub>3</sub>)  $\delta$  7.21 (dd,  $J = 8.8, 7.2$  Hz, 2H), 6.79 (d,  $J = 8.0$  Hz, 2H), 6.67 (t,  $J = 7.2$  Hz, 1H), 3.34 (dd,  $J = 14.4, 7.4$  Hz, 1H), 3.14 (dd,  $J = 14.4, 7.9$  Hz, 1H), 2.96 (qd,  $J = 7.0, 3.5$  Hz, 2H), 2.90 (s, 3H), 2.84 (dd,  $J = 6.5, 2.1$  Hz, 2H), 2.60 – 2.48 (m, 3H), 1.90 (ddt,  $J = 10.3, 6.9, 3.4$  Hz, 1H), 1.29 (s, 3H), 1.23 (s, 3H), 1.03 (t,  $J = 7.1$  Hz, 3H), 0.95 (dd,  $J = 6.9, 5.4$  Hz, 6H); <sup>13</sup>C NMR (125 MHz, CDCl<sub>3</sub>)  $\delta$  174.2, 169.9, 149.2, 128.1, 115.1, 111.5, 59.3, 53.9, 46.0, 43.2, 37.8, 37.2, 33.7, 26.8, 24.7, 19.3, 17.1, 11.8. HRMS (ESI<sup>+</sup>) calculated for [C<sub>21</sub>H<sub>33</sub>N<sub>3</sub>O<sub>2</sub>+H]<sup>+</sup> requires  $m/z$  360.2646, found  $m/z$  360.2650.

**(S)-2-(4-(Benzyloxy)-3-((methyl(phenyl)amino)methyl)butanoyl)-1-ethyl-5,5-dimethylpyrazolidin-3-one** (Table 3, entry 3). Experiment 1: Prepared according to the general procedure using 97 mg (0.50

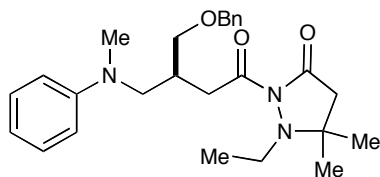

mmol) of *N*-methyl-*N*-((trimethylsilyl)methyl)aniline, 237 mg (0.75 mmol) of (*E*)-2-(4-(benzyloxy)but-2-enoyl)-1-ethyl-5,5-dimethylpyrazolidin-3-one, 7.5 mg (0.01 mmol) Ru(bpy)<sub>3</sub>Cl<sub>2</sub>·6H<sub>2</sub>O, 37 mg Sc(OTf)<sub>3</sub> (0.075 mmol), 33 mg (0.10 mmol) (*S*)-*i*BuPyBox, 42 mg (0.15 mmol) TBACl, 10 mL acetonitrile and irradiated for 6 h. Purified by chromatography using 50:50 hexanes:Et<sub>2</sub>O to yield 159 mg (0.36 mmol, 73% yield) of product (91% ee) as a colorless oil. Experiment 2: 97 mg (0.50 mmol) of *N*-methyl-*N*-((trimethylsilyl)methyl)aniline, 237 mg (0.75 mmol) of (*E*)-2-(4-(benzyloxy)but-2-enoyl)-1-ethyl-5,5-dimethylpyrazolidin-3-one, 7.5 mg (0.01 mmol) Ru(bpy)<sub>3</sub>Cl<sub>2</sub>·6H<sub>2</sub>O, 37 mg Sc(OTf)<sub>3</sub> (0.075 mmol), 33 mg (0.1 mmol) (*S*)-*i*BuPyBox, 42 mg (0.15 mmol) TBACl, 10 mL acetonitrile. Isolated 169 mg (0.39 mmol, 77% yield), 91% ee. [Daicel Chiracel AD-H, 5 to 50% *i*-PrOH, 3 mL/min, 249 nm;  $t_1 = 6.42$  min,  $t_2 = 8.4$  min],  $[\alpha]_D^{22}$  12.0 (c1.063, CH<sub>2</sub>Cl<sub>2</sub>). IR (thin film): 2973, 2860, 1741, 1506 cm<sup>-1</sup>; <sup>1</sup>H NMR (500 MHz, CDCl<sub>3</sub>)  $\delta$  7.36 – 7.24 (m, 5H), 7.23 – 7.18 (m, 2H), 6.80 (d,  $J = 8.2$  Hz, 2H), 6.66 (t,  $J = 7.2$  Hz, 1H), 4.46 (s, 2H), 3.57 – 3.47 (m, 2H), 3.44 – 3.33 (m, 2H), 3.07 (dd,  $J = 17.6, 6.3$  Hz, 1H), 3.01 – 2.90 (m, 6H), 2.76 – 2.68 (m, 1H), 2.56 (s, 2H), 1.28 (s, 3H), 1.27 (s, 3H), 1.04 (t,  $J = 7.1$  Hz, 3H); <sup>13</sup>C NMR (125 MHz, CDCl<sub>3</sub>)  $\delta$  175.1, 170.4, 149.6, 138.5, 129.1, 128.3, 127.6, 127.5, 116.0, 111.9, 73.1, 70.2, 60.5, 54.0, 47.1, 43.9, 38.9, 36.3, 34.3, 25.7, 12.8. HRMS (ESI<sup>+</sup>) calculated for [C<sub>26</sub>H<sub>35</sub>N<sub>3</sub>O<sub>3</sub>+H]<sup>+</sup> requires  $m/z$  438.2752, found  $m/z$  438.2748.

**(R)-2-(4,4-Dimethyl-3-((methyl(phenyl)amino)methyl)pentanoyl)-1-ethyl-5,5-dimethylpyrazolidin-3-one** (Table 3, entry 4). Experiment 1: Prepared according to the general procedure using 97 mg (0.50

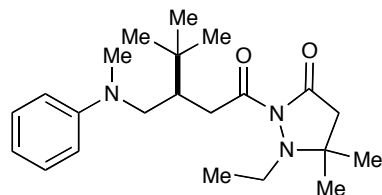

mmol) of *N*-methyl-*N*-((trimethylsilyl)methyl)aniline, 189 mg (0.75 mmol) of (*E*)-2-(4,4-dimethylpent-2-enoyl)-1-ethyl-5,5-dimethylpyrazolidin-3-one, 7.5 mg (0.01 mmol) Ru(bpy)<sub>3</sub>Cl<sub>2</sub>·6H<sub>2</sub>O, 37 mg Sc(OTf)<sub>3</sub> (0.075 mmol), 33 mg (0.10 mmol) (*S*)-*i*BuPyBox, 42 mg (0.15 mmol) TBACl, 10 mL acetonitrile and irradiated for 6 h. Purified by chromatography using 60:45 hexanes:Et<sub>2</sub>O to yield 59 mg (0.16 mmol, 32% yield) of product (96% ee) as a colorless oil. Experiment 2: 97 mg (0.50 mmol) of *N*-methyl-*N*-((trimethylsilyl)methyl)aniline, 189 mg (0.75 mmol) of (*E*)-2-(4,4-dimethylpent-2-enoyl)-1-ethyl-5,5-dimethylpyrazolidin-3-one, 7.5 mg (0.01 mmol) Ru(bpy)<sub>3</sub>Cl<sub>2</sub>·6H<sub>2</sub>O, 37 mg Sc(OTf)<sub>3</sub> (0.075 mmol), 33 mg (0.1 mmol) (*S*)-*i*BuPyBox, 42 mg (0.15 mmol) TBACl, 10 mL acetonitrile. Isolated 74 mg (0.20 mmol, 40% yield), 95% ee. [ $\alpha$ ]<sub>D</sub><sup>22</sup> 34.5 (c1.014, CH<sub>2</sub>Cl<sub>2</sub>). IR (thin film): 2963, 2870, 1739, 1505 cm<sup>-1</sup>; <sup>1</sup>H NMR (500 MHz, CDCl<sub>3</sub>)  $\delta$  7.18 (dd, *J* = 8.8, 7.3 Hz, 2H), 6.76 (d, *J* = 8.0 Hz, 2H), 6.67 (t, *J* = 7.2 Hz, 1H), 3.27 (dd, *J* = 13.9, 11.2 Hz, 1H), 3.18 (dd, *J* = 13.9, 4.8 Hz, 1H), 3.03 (dd, *J* = 18.0, 6.7 Hz, 1H), 2.95 – 2.79 (m, 3H), 2.77 (s, 3H), 2.64 (ddt, *J* = 9.4, 6.5, 4.7 Hz, 1H), 1.21 (s, 3H), 1.06 (s, 3H), 0.98 (s, 9H), 0.92 (t, *J* = 7.1 Hz, 3H); <sup>13</sup>C NMR (125 MHz, CDCl<sub>3</sub>)  $\delta$  175.3, 170.7, 151.4, 129.0, 116.9, 113.6, 59.9, 55.1, 46.9, 44.5, 41.3, 37.7, 35.2, 32.6, 27.8, 25.8, 25.5, 12.6. HRMS (ESI<sup>+</sup>) calculated for [C<sub>22</sub>H<sub>35</sub>N<sub>3</sub>O<sub>2</sub>+H]<sup>+</sup> requires *m/z* 374.2803, found *m/z* 374.2806.

**(R)-1-Ethyl-5,5-dimethyl-2-(4-(methyl(phenyl)amino)-3-phenylbutanoyl)pyrazolidin-3-one** (Table 3, entry 5) Experiment 1: Prepared according to the general procedure using 99.5 mg (0.51 mmol) of *N*-methyl-*N*-((trimethylsilyl)methyl)aniline, 204 mg (0.75 mmol) of (*E*)-2-cinnamoyl-1-ethyl-5,5-

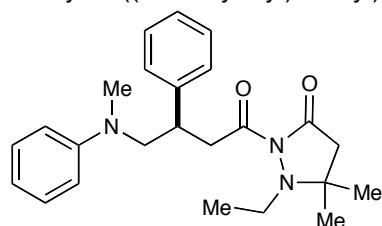

dimethylpyrazolidin-3-one, 7.5 mg (0.01 mmol) Ru(bpy)<sub>3</sub>Cl<sub>2</sub>·6H<sub>2</sub>O, 37 mg Sc(OTf)<sub>3</sub> (0.075 mmol), 33 mg (0.10 mmol) (*S*)-*i*BuPyBox, 42 mg (0.15 mmol) TBACl, 10 mL acetonitrile and irradiated for 12 h. Purified by chromatography using 70:30 hexanes: EtOAc to yield 149.2 mg (0.38 mmol, 74% yield) of product (93% ee) as a colorless oil. Experiment 2: 97.9 mg (0.51 mmol) of *N*-methyl-*N*-((trimethylsilyl)methyl)aniline, 204 mg (0.75 mmol) of (*E*)-2-cinnamoyl-1-ethyl-5,5-dimethylpyrazolidin-3-one, 7.5 mg (0.01 mmol) Ru(bpy)<sub>3</sub>Cl<sub>2</sub>·6H<sub>2</sub>O, 37 mg Sc(OTf)<sub>3</sub> (0.075 mmol), 33 mg (0.1 mmol) (*S*)-*i*BuPyBox, 42 mg (0.15 mmol) TBACl, 10 mL acetonitrile. Isolated 148.3 mg (0.38 mmol, 74% yield), 92% ee. [ $\alpha$ ]<sub>D</sub><sup>22</sup> +72.7 (c1.094, CH<sub>2</sub>Cl<sub>2</sub>). IR (thin film): 2979, 2935, 2878, 1744, 1507 cm<sup>-1</sup>; <sup>1</sup>H NMR (500 MHz, CDCl<sub>3</sub>)  $\delta$  7.33 – 7.12 (m, 7H), 6.78 – 6.72 (m, 2H), 6.69 (d, *J* = 7.2 Hz, 1H), 3.84 – 3.72 (m, 2H), 3.41 (dd, *J* = 16.8, 7.0 Hz, 1H), 3.34 – 3.21 (m, 2H), 2.88 (q, *J* = 7.0 Hz, 2H), 2.63 (s, 3H), 2.58 – 2.44 (m, 2H), 1.23 (s, 3H), 1.14 (s, 3H), 0.89 (t, *J* = 7.1 Hz, 3H); <sup>13</sup>C NMR (125 MHz, CDCl<sub>3</sub>)  $\delta$  175.3, 169.7, 149.1, 142.3, 129.2, 128.5, 128.1, 126.8, 116.1, 112.1, 60.3, 59.4, 47.0, 44.1, 40.0, 39.3, 39.3, 25.6, 12.6. HRMS (ESI<sup>+</sup>) calc'd for [C<sub>24</sub>H<sub>31</sub>N<sub>3</sub>O<sub>2</sub>+H]<sup>+</sup> requires *m/z* 394.2490, found *m/z* 394.2488.

**(R)-2-(3-(4-Chlorophenyl)-4-(methyl(phenyl)amino)butanoyl)-1-ethyl-5,5-dimethylpyrazolidin-3-one** (Table 3, entry 6) Experiment 1: Prepared according to the general procedure using 101.6 mg (0.53

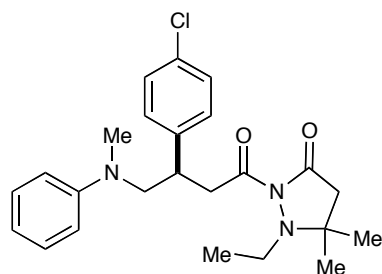

mmol) of *N*-methyl-*N*-((trimethylsilyl)methyl)aniline, 231 mg (0.75 mmol) of (*E*)-2-(3-(4-chlorophenyl)acryloyl)-1-ethyl-5,5-dimethylpyrazolidin-3-one, 7.5 mg (0.01 mmol) Ru(bpy)<sub>3</sub>Cl<sub>2</sub>·6H<sub>2</sub>O, 37 mg Sc(OTf)<sub>3</sub> (0.075 mmol), 33 mg (0.10 mmol) (*S*)-*i*BuPyBox, 42 mg (0.15 mmol) TBACl, 10 mL acetonitrile and irradiated for 12 h. Purified by chromatography using 70:30 hexanes: EtOAc to yield 134.9 mg (0.32 mmol, 60% yield) of product (90% ee) as a colorless oil. Experiment 2: 99.0 mg (0.51 mmol) of *N*-methyl-*N*-((trimethylsilyl)methyl)aniline, 231 mg (0.75 mmol) of (*E*)-2-(3-(4-chlorophenyl)acryloyl)-1-ethyl-5,5-dimethylpyrazolidin-3-one, 7.5 mg (0.01 mmol) Ru(bpy)<sub>3</sub>Cl<sub>2</sub>·6H<sub>2</sub>O, 37 mg Sc(OTf)<sub>3</sub> (0.075 mmol), 33 mg (0.1 mmol) (*S*)-*i*BuPyBox, 42 mg

(0.15 mmol) TBACl, 10 mL acetonitrile. Isolated 142.0 mg (0.33 mmol, 65% yield), 91% ee. [Daicel Chiracel AD-H, 5 to 50% *i*-PrOH, 3 mL/min, 249 nm;  $t_1$  = 6.52 min,  $t_2$  = 7.94 min].  $[\alpha]_D^{22} +80.0$  (c1.050, CH<sub>2</sub>Cl<sub>2</sub>). IR (thin film): 2978, 2878, 1744, 1599, 1233 cm<sup>-1</sup>; <sup>1</sup>H NMR (500 MHz, CDCl<sub>3</sub>)  $\delta$  7.28 – 7.19 (m, 4H), 7.19 – 7.12 (m, 2H), 6.74 (d,  $J$  = 8.1 Hz, 2H), 6.69 (t,  $J$  = 7.2 Hz, 1H), 3.82 – 3.70 (m, 2H), 3.37 (dd,  $J$  = 17.0, 6.9 Hz, 1H), 3.25 (tt,  $J$  = 11.8, 6.5 Hz, 2H), 2.90 (q,  $J$  = 7.1 Hz, 3H), 2.64 (s, 3H), 2.59 – 2.49 (m, 2H), 0.91 (t,  $J$  = 7.1 Hz, 3H); <sup>13</sup>C NMR (125 MHz, CDCl<sub>3</sub>)  $\delta$  175.4, 169.4, 148.9, 140.9, 132.5, 129.5, 129.2, 128.6, 116.3, 112.1, 60.4, 59.3, 47.0, 44.0, 39.4, 39.2, 25.6, 12.6. HRMS (ESI<sup>+</sup>) calc'd for [C<sub>24</sub>H<sub>30</sub>ClN<sub>3</sub>O<sub>2</sub>+H]<sup>+</sup> requires  $m/z$  428.2100, found  $m/z$  428.2108.

**(*R*)-1-Ethyl-2-(3-(4-methoxyphenyl)-4-(methyl(phenyl)amino)butanoyl)-5,5-dimethylpyrazolidin-3-one** (Table 3, entry 7) Experiment 1: Prepared according to the general procedure using 100.0 mg (0.52

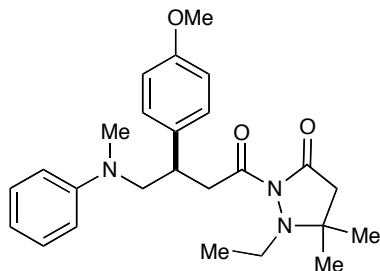

mmol) of *N*-methyl-*N*-((trimethylsilyl)methyl)aniline, 227 mg (0.75 mmol) of (*E*)-1-ethyl-2-(3-(4-methoxyphenyl)acryloyl)-5,5-dimethylpyrazolidin-3-one, 7.5 mg (0.01 mmol) Ru(bpy)<sub>3</sub>Cl<sub>2</sub>·6H<sub>2</sub>O, 37 mg Sc(OTf)<sub>3</sub> (0.075 mmol), 33 mg (0.10 mmol) (*S*)-*i*BuPyBox, 42 mg (0.15 mmol) TBACl, 10 mL acetonitrile and irradiated for 12 h. Purified by chromatography using 60:40 hexanes: EtOAc to yield 184.0 mg (0.43 mmol, 84% yield) of product (94% ee) as a white solid. Experiment 2: 100.7 mg (0.52 mmol) of *N*-methyl-*N*-((trimethylsilyl)methyl)aniline, 227 mg (0.75 mmol) of (*E*)-1-ethyl-2-(3-(4-methoxyphenyl)acryloyl)-5,5-dimethylpyrazolidin-3-one, 7.5 mg

(0.01 mmol) Ru(bpy)<sub>3</sub>Cl<sub>2</sub>·6H<sub>2</sub>O, 37 mg Sc(OTf)<sub>3</sub> (0.075 mmol), 33 mg (0.1 mmol) (*S*)-*i*BuPyBox, 42 mg (0.15 mmol) TBACl, 10 mL acetonitrile. Isolated 181.0 mg (0.43 mmol, 82% yield), 94% ee. [Daicel Chiracel AD-H, 5 to 50% MeOH, 3 mL/min, 249 nm;  $t_1$  = 5.30 min,  $t_2$  = 6.15 min].  $[\alpha]_D^{22} +81.2$  (c1.039, CH<sub>2</sub>Cl<sub>2</sub>). IR (thin film): 2972, 2835, 1741, 1599, 1509 cm<sup>-1</sup>; <sup>1</sup>H NMR (500 MHz, CDCl<sub>3</sub>)  $\delta$  7.25 – 7.20 (m, 2H), 7.14 (d,  $J$  = 8.6 Hz, 2H), 6.80 (d,  $J$  = 8.6 Hz, 2H), 6.75 (d,  $J$  = 8.1 Hz, 2H), 6.68 (t,  $J$  = 7.2 Hz, 1H), 3.81 – 3.67 (m, 2H), 3.76 (s, 3H), 3.37 (dd,  $J$  = 16.7, 7.2 Hz, 1H), 3.30 – 3.17 (m, 2H), 2.89 (q,  $J$  = 6.9 Hz, 2H), 2.63 (s, 3H), 2.58 – 2.47 (m, 2H), 1.23 (s, 3H), 1.15 (s, 3H), 0.91 (t,  $J$  = 7.1 Hz, 3H); <sup>13</sup>C NMR (125 MHz, CDCl<sub>3</sub>)  $\delta$  175.3, 169.8, 158.4, 149.1, 134.3, 129.1, 129.0, 116.0, 113.8, 112.0, 60.3, 59.4, 55.2, 47.0, 44.1, 39.5, 39.3, 39.2, 25.6, 12.5. HRMS (ESI<sup>+</sup>) calc'd for [C<sub>25</sub>H<sub>33</sub>N<sub>3</sub>O<sub>3</sub>+H]<sup>+</sup> requires  $m/z$  424.2595, found  $m/z$  424.2599. (mp = 153–158 °C).

**(*R*)-1-Ethyl-5,5-dimethyl-2-(4-(methyl(phenyl)amino)-3-(*o*-tolyl)butanoyl)pyrazolidin-3-one** (Table 3, entry 8) Experiment 1: Prepared according to the general procedure using 98.5 mg (0.51 mmol) of *N*-

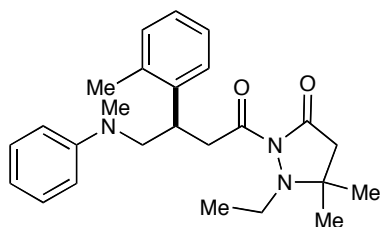

methyl-*N*-((trimethylsilyl)methyl)aniline, 214 mg (0.75 mmol) of (*E*)-1-ethyl-5,5-dimethyl-2-(3-(*o*-tolyl)acryloyl)pyrazolidin-3-one, 7.5 mg (0.01 mmol) Ru(bpy)<sub>3</sub>Cl<sub>2</sub>·6H<sub>2</sub>O, 37 mg Sc(OTf)<sub>3</sub> (0.075 mmol), 33 mg (0.10 mmol) (*S*)-*i*BuPyBox, 42 mg (0.15 mmol) TBACl, 10 mL acetonitrile and irradiated for 12 h. Purified by chromatography using 70:30 hexanes: EtOAc to yield 165.0 mg (0.41 mmol, 81% yield) of product (81% ee) as a colorless oil. Experiment 2: 100.4 mg (0.52 mmol) of *N*-methyl-*N*-((trimethylsilyl)methyl)aniline, 214 mg (0.75 mmol) of (*E*)-1-ethyl-5,5-dimethyl-2-(3-(*o*-tolyl)acryloyl)pyrazolidin-3-one, 7.5 mg (0.01

mmol) Ru(bpy)<sub>3</sub>Cl<sub>2</sub>·6H<sub>2</sub>O, 37 mg Sc(OTf)<sub>3</sub> (0.075 mmol), 33 mg (0.1 mmol) (*S*)-*i*BuPyBox, 42 mg (0.15 mmol) TBACl, 10 mL acetonitrile. Isolated 163.0 mg (0.40 mmol, 80% yield), 83% ee. [Daicel Chiracel OD-H, 5 to 50% MeOH, 3 mL/min, 249 nm;  $t_1$  = 5.36 min,  $t_2$  = 5.84 min].  $[\alpha]_D^{22} +60.1$  (c1.048, CH<sub>2</sub>Cl<sub>2</sub>). IR (thin film): 2976, 2877, 1744, 1705, 1599, 1507 cm<sup>-1</sup>; <sup>1</sup>H NMR (500 MHz, CDCl<sub>3</sub>)  $\delta$  7.29 (d,  $J$  = 7.7 Hz, 1H), 7.25 – 7.20 (m, 2H), 7.19 – 7.13 (m, 1H), 7.06 (d,  $J$  = 4.1 Hz, 2H), 6.74 (d,  $J$  = 8.1 Hz, 2H), 6.68 (d,  $J$  = 7.2 Hz, 1H), 4.15 – 4.04 (m, 1H), 3.76 (dd,  $J$  = 14.6, 6.9 Hz, 1H), 3.52 (dd,  $J$  = 16.8, 8.2 Hz, 1H), 3.29 (dd,  $J$  = 14.6, 8.1 Hz, 1H), 3.19 (dd,  $J$  = 16.9, 6.5 Hz, 1H), 2.85 (dd,  $J$  = 7.2, 3.9 Hz, 1H), 2.65 (s, 3H), 2.56 – 2.45 (m, 2H), 2.22 (s, 3H), 1.22 (s, 3H), 1.10 (s, 3H), 0.84 (t,  $J$  = 7.1 Hz, 3H); <sup>13</sup>C NMR (125 MHz, CDCl<sub>3</sub>)  $\delta$  175.4, 169.9, 149.2, 140.9, 137.3, 130.5, 129.2, 126.3, 126.2, 126.0, 116.1, 111.9, 60.3, 59.3, 47.0, 44.0, 39.4, 39.2, 34.9, 25.6, 25.5, 19.8, 12.4. HRMS (ESI<sup>+</sup>) calc'd for [C<sub>25</sub>H<sub>33</sub>N<sub>3</sub>O<sub>2</sub>+H]<sup>+</sup> requires  $m/z$  408.2646, found  $m/z$  408.2649.

**(R)-1-Ethyl-2-(3-(furan-3-yl)-4-(methyl(phenyl)amino)butanoyl)-5,5-dimethylpyrazolidin-3-one**

(Table 3, entry 9) Experiment 1: Prepared according to the general procedure using 97.1 mg (0.50 mmol) of *N*-methyl-*N*-((trimethylsilyl)methyl)aniline, 197 mg (0.75 mmol) of (*E*)-1-ethyl-2-(3-(furan-3-yl)acryloyl)-5,5-dimethylpyrazolidin-3-one, 7.5 mg (0.01 mmol) Ru(bpy)<sub>3</sub>Cl<sub>2</sub>·6H<sub>2</sub>O, 37 mg Sc(OTf)<sub>3</sub> (0.075 mmol), 33 mg (0.10 mmol) (*S*)-*i*BuPyBox, 42 mg (0.15 mmol) TBACl, 10 mL acetonitrile and irradiated for 12 h. Purified by chromatography using 60:40 hexanes: EtOAc to yield 164.0 mg (0.43 mmol, 86% yield) of product (93% ee) as a colorless oil. Experiment 2: 97.0 mg (0.50 mmol) of *N*-methyl-*N*-((trimethylsilyl)methyl)aniline, 214 mg (0.75

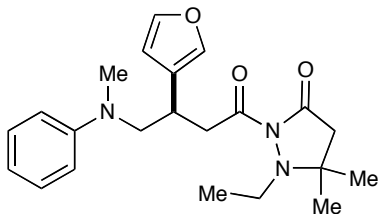

mmol) of (*E*)-1-ethyl-2-(3-(furan-3-yl)acryloyl)-5,5-dimethylpyrazolidin-3-one, 7.5 mg (0.01 mmol) Ru(bpy)<sub>3</sub>Cl<sub>2</sub>·6H<sub>2</sub>O, 37 mg Sc(OTf)<sub>3</sub> (0.075 mmol), 33 mg (0.1 mmol) (*S*)-*i*BuPyBox, 42 mg (0.15 mmol) TBACl, 10 mL acetonitrile. Isolated 153.0 mg (0.40 mmol, 80% yield), 90% ee. [D<sub>a</sub>c<sub>e</sub>l Chiracel AD-H, 5 to 50% MeOH, 3 mL/min, 249 nm; *t*<sub>1</sub> = 4.11 min, *t*<sub>2</sub> = 4.98 min]. [α]<sub>D</sub><sup>22</sup> +19.2 (c1.018, CH<sub>2</sub>Cl<sub>2</sub>). IR (thin film): 2978, 2878, 1744, 1600, 1507, 1231 cm<sup>-1</sup>; <sup>1</sup>H NMR (500 MHz, CDCl<sub>3</sub>) δ 7.34 (t, *J* = 1.7 Hz, 1H), 7.27 – 7.18 (m, 3H), 6.80 – 6.72 (m, 2H), 6.72 – 6.63 (m, 1H), 6.36 (dd, *J* = 1.8, 0.9 Hz, 1H), 3.77 – 3.62 (m, 2H), 3.27 (ddd, *J* = 17.2, 7.4, 4.1 Hz, 2H), 3.17 (dd, *J* = 16.6, 6.2 Hz, 1H), 2.92 (q, *J* = 6.9 Hz, 2H), 2.80 (s, 3H), 2.54 (d, *J* = 2.7 Hz, 2H), 1.25 (s, 3H), 1.21 (s, 3H), 0.95 (t, *J* = 7.1 Hz, 3H); <sup>13</sup>C NMR (125 MHz, CDCl<sub>3</sub>) δ 175.3, 169.6, 149.2, 142.9, 139.6, 129.2, 125.6, 116.2, 112.2, 109.8, 60.3, 58.5, 47.0, 44.0, 39.3, 39.2, 30.9, 25.6, 12.6. HRMS (ESI<sup>+</sup>) calc'd for [C<sub>22</sub>H<sub>29</sub>N<sub>3</sub>O<sub>3</sub>+H]<sup>+</sup> requires *m/z* 384.2282, found *m/z* 384.2279.

**(R)-2-(4-(4-bromophenyl)(methyl)amino)-3-(4-methoxyphenyl)butanoyl)-1-ethyl-5,5-dimethylpyrazolidin-3-one**. Experiment 1: Prepared according to the general procedure using 136.0 mg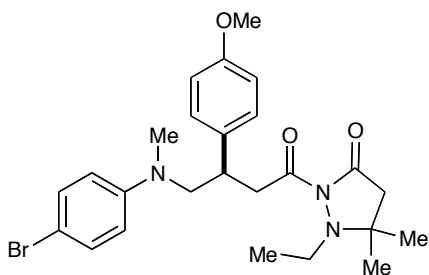

(0.50 mmol) of 4-bromo-*N*-methyl-*N*-((trimethylsilyl)methyl)aniline, 227.1 mg (0.75 mmol) of (*E*)-1-ethyl-2-(3-(4-methoxyphenyl)acryloyl)-5,5-dimethylpyrazolidin-3-one, 7.5 mg (0.01 mmol) Ru(bpy)<sub>3</sub>Cl<sub>2</sub>·6H<sub>2</sub>O, 37 mg Sc(OTf)<sub>3</sub> (0.075 mmol), 33 mg (0.10 mmol) (*S*)-*i*BuPyBox, 42 mg (0.15 mmol) TBACl, 10 mL acetonitrile and irradiated for 12 h. Purified by chromatography using 60:40 hexanes: EtOAc to yield 205.6 mg (0.41 mmol, 82% yield) of product (94% ee) as a colorless oil. Experiment 2: 135.9 mg (0.50 mmol) of 4-bromo-*N*-methyl-*N*-((trimethylsilyl)methyl)aniline, 227.0 mg (0.75 mmol) of (*E*)-1-ethyl-2-(3-(4-methoxyphenyl)acryloyl)-5,5-dimethylpyrazolidin-3-one, 7.5 mg (0.01 mmol) Ru(bpy)<sub>3</sub>Cl<sub>2</sub>·6H<sub>2</sub>O, 37 mg Sc(OTf)<sub>3</sub> (0.075 mmol), 33 mg (0.1 mmol) (*S*)-*i*BuPyBox, 42 mg (0.15 mmol) TBACl, 10 mL acetonitrile. Isolated 214.0 mg (0.43 mmol, 85% yield), 94% ee. [D<sub>a</sub>c<sub>e</sub>l Chiracel OJ-H, 5 to 50% MeOH, 3 mL/min, 249 nm; *t*<sub>1</sub> = 6.39 min, *t*<sub>2</sub> = 6.88 min]. [α]<sub>D</sub><sup>22</sup> +101.5 (c1.012, CH<sub>2</sub>Cl<sub>2</sub>). IR (thin film): 2972, 2934, 1740, 1701, 1609 cm<sup>-1</sup>; <sup>1</sup>H NMR (500 MHz, CDCl<sub>3</sub>) δ 7.27 (d, *J* = 9.0 Hz, 2H), 7.10 (d, *J* = 8.6 Hz, 2H), 6.80 (d, *J* = 8.6 Hz, 2H), 6.61 (d, *J* = 9.1 Hz, 2H), 3.80 – 3.75 (m, 4H), 3.72 – 3.62 (m, 1H), 3.31 (dd, *J* = 16.9, 6.7 Hz, 1H), 2.91 (q, *J* = 7.1 Hz, 2H), 2.56 (s, 3H), 2.55 (d, *J* = 3.4 Hz, 2H), 1.25 (s, 3H), 1.18 (s, 3H), 0.93 (t, *J* = 7.1 Hz, 3H); <sup>13</sup>C NMR (125 MHz, CDCl<sub>3</sub>) δ 175.3, 169.7, 158.5, 147.9, 134.1, 131.8, 129.0, 113.9, 113.6, 107.8, 60.3, 59.3, 55.2, 47.0, 44.0, 39.5, 39.5, 38.7, 25.7, 25.6, 12.6. HRMS (ESI<sup>+</sup>) calc'd for [C<sub>25</sub>H<sub>32</sub>BrN<sub>3</sub>O<sub>3</sub>+H]<sup>+</sup> requires *m/z* 502.1700, found *m/z* 502.1698.

**(S)-4-Methyl-1-phenylpyrrolidin-2-one** (Scheme 2, 8) Experiment 1: Prepared according to the general procedure using 91.7 mg (0.51 mmol) of *N*-((trimethylsilyl)methyl)aniline, 158 mg (0.75 mmol) of (*E*)-2-(but-2-enoyl)-1-ethyl-5,5-dimethylpyrazolidin-3-one, 7.5 mg (0.01 mmol)

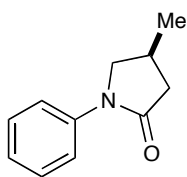

Ru(bpy)<sub>3</sub>Cl<sub>2</sub>·6H<sub>2</sub>O, 37 mg Sc(OTf)<sub>3</sub> (0.075 mmol), 33 mg (0.10 mmol) (*S*)-*i*BuPyBox, 42 mg (0.15 mmol) TBACl, 10 mL acetonitrile and irradiated for 18 h. Purified by chromatography using 70:30 hexanes:EtOAc to yield 77.2 mg (0.44 mmol, 86% yield) of product (93% ee) as a colorless oil. Experiment 2: 93.9 mg (0.52 mmol) of *N*-((trimethylsilyl)methyl)aniline, 158 mg (0.75 mmol) of (*E*)-2-(but-2-enoyl)-1-ethyl-5,5-dimethylpyrazolidin-3-one, 7.5 mg (0.01 mmol) Ru(bpy)<sub>3</sub>Cl<sub>2</sub>·6H<sub>2</sub>O, 37 mg Sc(OTf)<sub>3</sub> (0.075 mmol), 33 mg (0.1 mmol) (*S*)-*i*BuPyBox, 42 mg (0.15 mmol) TBACl, 10 mL acetonitrile. Isolated

78.0 mg (0.44 mmol, 85% yield), 93% ee. [Supelco's Beta Dex 225, 140 °C for 45 min, then 5 °C/min to 180 °C;  $t_1$ = 49.95 min,  $t_2$ = 50.39 min].  $[\alpha]_D^{22}$  -3.1 (c1.152, CH<sub>2</sub>Cl<sub>2</sub>). IR (thin film): 2972, 1745, 1704, 1591, 1500 cm<sup>-1</sup>; <sup>1</sup>H NMR (500 MHz, CDCl<sub>3</sub>)  $\delta$  7.60 (d,  $J$  = 7.9 Hz, 2H), 7.36 (t,  $J$  = 8.0 Hz, 2H), 7.14 (t,  $J$  = 7.4 Hz, 1H), 3.95 (dd,  $J$  = 9.5, 7.6 Hz, 1H), 3.45 (dd,  $J$  = 9.4, 6.4 Hz, 1H), 2.76 (dd,  $J$  = 16.8, 8.4 Hz, 1H), 2.64 – 2.48 (m, 1H), 2.26 (dd,  $J$  = 16.8, 7.5 Hz, 1H), 1.21 (d,  $J$  = 6.7 Hz, 3H); <sup>13</sup>C NMR (125 MHz, CDCl<sub>3</sub>)  $\delta$  173.8, 139.4, 128.8, 124.4, 119.9, 55.9, 41.0, 26.3, 19.5. HRMS (ESI<sup>+</sup>) calc'd for [C<sub>11</sub>H<sub>13</sub>FNO+H]<sup>+</sup> requires  $m/z$  176.1070, found  $m/z$  176.1065.

## V. Removal of pyrazolidinone moiety

**General procedure for the formation of alcohols:** A solution of EtSH (3.4 equiv) in THF (0.1 M) was cooled to -78 °C and treated with *n*-BuLi (1.6 M in hexane, 2.5 equiv). The reaction was stirred at 0 °C for 30 min. A solution of the substrate (1 equiv) in THF (0.06 M) was then added. The reaction was stirred at 0 °C until the consumption of the starting material was complete as judged by TLC (0.5 – 1 h). The reaction was quenched with saturated NH<sub>4</sub>Cl (aq) and the phases separated. The aqueous layer was extracted with Et<sub>2</sub>O (x 3), the combined organic layers were dried over MgSO<sub>4</sub>, and the solvent removed by rotary evaporation. The crude product was then dissolved in Et<sub>2</sub>O (0.1 M) and added to a suspension of LiAlH<sub>4</sub> (3 equiv) in Et<sub>2</sub>O at room temperature. The mixture was stirred until the consumption of the starting material was judged to be complete by TLC (0.5 – 2 h). The reaction was carefully quenched by the addition of water at 0 °C. The aqueous layer was then extracted with Et<sub>2</sub>O (x 3) and the combined organic layers were dried over MgSO<sub>4</sub> and the solvents removed to yield the crude product, which was purified by column chromatography.

**(*R*)-4-((2-Fluorophenyl)(methyl)amino)-3-methylbutan-1-ol.** Experiment 1: Prepared according to the general procedure using 104  $\mu$ L (1.4 mmol) of ethanethiol, 0.6 mL (1.0 mmol) of *n*-BuLi and 144.2 mg (0.41 mmol) of 1-ethyl-(*S*)-2-(4-((2-fluorophenyl)(methyl)amino)-3-methylbutanoyl)-5,5-dimethylpyrazolidin-3-one. Subsequent to aqueous workup, the crude thioester was used in the next step without further purification using 47 mg (1.2 mmol) of LiAlH<sub>4</sub>. Column chromatography using 70:30 hexanes:EtOAc yields 64.4 mg (0.30 mmol, 74% yield) of product

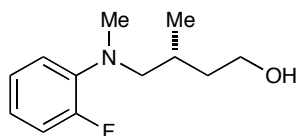

(-95% ee) as a colorless oil. Experiment 2: 104  $\mu$ L (1.4 mmol) of ethanethiol, 0.6 mL (1.0 mmol) of *n*-BuLi and 138.0 mg (0.40 mmol) of 1-ethyl-2-(4-((2-fluorophenyl)(methyl)amino)-3-methylbutanoyl)-5,5-dimethylpyrazolidin-3-one. Subsequent to aqueous workup, the crude thioester was used in the next step without further purification using 47 mg (1.2 mmol) of LiAlH<sub>4</sub>. Isolated 62.6 mg (0.30 mmol, 75% yield), -96% ee. [Daicel Chiracel OD-H, 3% *i*-PrOH, 5 mL/min, 249 nm;  $t_1$ = 6.28 min,  $t_2$ = 7.08 min].  $[\alpha]_D^{22}$  -8.5 (c1.175, CH<sub>2</sub>Cl<sub>2</sub>). IR (thin film): 3450, 2957, 2872, 16336, 1612 cm<sup>-1</sup>; <sup>1</sup>H NMR (500 MHz, CDCl<sub>3</sub>)  $\delta$  7.08 – 6.96 (m, 3H), 6.96 – 6.88 (m, 1H), 3.78 – 3.69 (m, 1H), 3.70 – 3.56 (m, 1H), 3.00 (s, 1H), 2.98 – 2.88 (m, 2H), 2.80 (s, 3H), 2.02 – 1.87 (m, 1H), 1.72 – 1.57 (m, 1H), 1.57 – 1.45 (m, 1H), 0.96 (d,  $J$  = 6.8 Hz, 3H); <sup>13</sup>C NMR (125 MHz, CDCl<sub>3</sub>)  $\delta$  156.0 ( $J$  = 245.7 Hz), 140.1 ( $J$  = 8.9 Hz), 124.3 ( $J$  = 3.6 Hz), 122.4 ( $J$  = 7.8 Hz), 120.3 ( $J$  = 3.2 Hz), 116.4 ( $J$  = 20.9 Hz), 62.1 ( $J$  = 3.2 Hz), 61.5, 41.6 ( $J$  = 2.6 Hz), 39.0, 29.8, 19.2. HRMS (ESI<sup>+</sup>) calc'd for [C<sub>12</sub>H<sub>18</sub>FNO+H]<sup>+</sup> requires  $m/z$  212.1446, found  $m/z$  212.1442.

**(*R*)-4-(Diphenylamino)-3-methylbutan-1-ol.** Experiment 1: Prepared according to the general procedure using 104  $\mu$ L (1.4 mmol) of ethanethiol, 0.6 mL (1.0 mmol) of *n*-BuLi and 162.7 mg (0.41 mmol) of (*S*)-2-(4-(diphenylamino)-3-methylbutanoyl)-1-ethyl-5,5-dimethylpyrazolidin-3-one. Subsequent to aqueous workup, the crude thioester was used in the next step without further purification using 47 mg (1.2 mmol) of LiAlH<sub>4</sub>. Column chromatography using 70:30 hexanes:EtOAc yields 71.6 mg (0.28 mmol, 76% yield) of product (-91% ee) as a colorless oil.

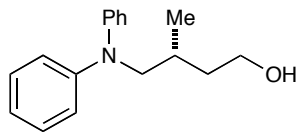

Experiment 2: 119  $\mu$ L (1.6 mmol) of ethanethiol, 0.7 mL (1.0 mmol) of *n*-BuLi and 186.0 mg (0.47 mmol) of 2-(4-(diphenylamino)-3-methylbutanoyl)-1-ethyl-5,5-dimethylpyrazolidin-3-one. Subsequent to aqueous workup, the crude thioester was used in the next step without further purification using 54 mg (1.4 mmol) of LiAlH<sub>4</sub>. Isolated 93.6 mg (0.37 mmol, 78% yield), -92% ee. [Daicel Chiracel OJ-H, 5% *i*-PrOH, 4 mL/min, 249 nm;  $t_1$ = 8.03 min,  $t_2$ = 8.83 min].  $[\alpha]_D^{22}$  12.7 (c0.780, CH<sub>2</sub>Cl<sub>2</sub>). IR (thin film): 3440, 3059, 2927,



2870, 1589, 1496  $\text{cm}^{-1}$ ;  $^1\text{H}$  NMR (500 MHz,  $\text{CDCl}_3$ )  $\delta$  7.29 – 7.21 (m, 4H), 7.00 (d,  $J$  = 8.6 Hz, 3H), 6.94 (t,  $J$  = 7.3 Hz, 3H), 3.76 – 3.68 (m, 1H), 3.68 – 3.60 (m, 2H), 3.53 (dd,  $J$  = 14.6, 7.7 Hz, 1H), 2.12 – 2.00 (m, 1H), 1.84 – 1.73 (m, 1H), 1.47 – 1.35 (m, 1H), 1.26 (s, 1H), 0.99 (d,  $J$  = 6.7 Hz, 3H);  $^{13}\text{C}$  NMR (125 MHz,  $\text{CDCl}_3$ )  $\delta$  148.8, 129.2, 121.3, 121.3, 61.1, 59.1, 37.7, 28.9, 17.9. HRMS ( $\text{ESI}^+$ ) calc'd for  $[\text{C}_{17}\text{H}_{21}\text{NO}+\text{H}]^+$  requires  $m/z$  256.1696, found  $m/z$  256.1698.

**(S)-4-(Benzyl(phenyl)amino)-3-methylbutan-1-ol.** Experiment 1: Prepared according to the general procedure using 76  $\mu\text{L}$  (1.0 mmol) of ethanethiol, 0.5 mL (0.75 mmol) of *n*-BuLi and 13.0 mg (0.30 mmol) of (S)-2-(4-(benzyl(phenyl)amino)-3-methylbutanoyl)-1-ethyl-5,5-dimethylpyrazolidin-3-one. Subsequent

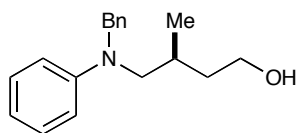

to aqueous workup, the crude thioester was used in the next step without further purification using 34 mg (0.9 mmol) of  $\text{LiAlH}_4$ . Column chromatography using 70:30 hexanes:EtOAc yields 51.6 mg (0.19 mmol, 64% yield) of product (93% ee) as a colorless oil. Experiment 2: 75  $\mu\text{L}$  (1.0 mmol) of ethanethiol, 0.5 mL (0.70 mmol) of *n*-BuLi and 121.0 mg (0.29 mmol) of 2-(4-(benzyl(phenyl)amino)-3-methylbutanoyl)-1-ethyl-5,5-dimethylpyrazolidin-3-one. Subsequent to aqueous workup, the crude thioester was used in the next step without further purification using 33 mg (0.87 mmol) of  $\text{LiAlH}_4$ . Isolated 49.2 mg (0.18 mmol, 63% yield), 95% ee. [Daicel Chiracel OD-H, 5 to 50% *i*-PrOH, 3 mL/min, 249 nm;  $t_1$  = 7.22 min,  $t_2$  = 8.17 min].  $[\alpha]_D^{22}$  2.9 (c0.805,  $\text{CH}_2\text{Cl}_2$ ). IR (thin film): 3404, 2927, 2871, 1598, 1505, 1358  $\text{cm}^{-1}$ ;  $^1\text{H}$  NMR (500 MHz,  $\text{CDCl}_3$ )  $\delta$  7.31 – 7.25 (m, 2H), 7.24 – 7.14 (m, 5H), 6.75 – 6.64 (m, 3H), 4.59 (s, 2H), 3.78 – 3.69 (m, 1H), 3.69 – 3.61 (m, 1H), 3.34 (dd,  $J$  = 14.7, 7.1 Hz, 1H), 3.21 (dd,  $J$  = 14.6, 7.5 Hz, 1H), 2.22 – 2.07 (m, 1H), 1.79 – 1.69 (m, 1H), 1.45 (s, 1H), 1.43 – 1.35 (m, 1H), 0.97 (d,  $J$  = 6.7 Hz, 3H);  $^{13}\text{C}$  NMR (125 MHz,  $\text{CDCl}_3$ )  $\delta$  148.7, 138.5, 129.1, 128.5, 126.8, 126.7, 116.5, 113.0, 61.1, 58.4, 55.6, 37.8, 29.2, 18.0. HRMS ( $\text{ESI}^+$ ) calc'd for  $[\text{C}_{18}\text{H}_{23}\text{NO}+\text{H}]^+$  requires  $m/z$  270.1853, found  $m/z$  270.1850.

**(S)-S-Ethyl 3-methyl-4-(methyl(phenyl)amino)butanethioate** (Scheme 2, 5). *n*-BuLi (1.6 M in hexane, 0.34 mL, 1.5 equiv) was added at  $-78$   $^\circ\text{C}$  to a solution of ethanethiol (53  $\mu\text{L}$ , 0.72 mmol, 2.0 equiv) in THF (5 mL). The solution was stirred at  $0$   $^\circ\text{C}$  for 30 minutes. A solution of (S)-1-

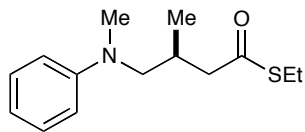

ethyl-5,5-dimethyl-2-(3-methyl-4-(methyl(phenyl)amino)butanoyl)pyrazolidin-3-one (120.7 mg, 0.36 mmol, 1 equiv) in THF (5 mL) was then added. The reaction was stirred at  $0$   $^\circ\text{C}$  for 10 minutes. The reaction was then quenched with saturated  $\text{NH}_4\text{Cl}$  (5 mL) and the phases separated. The aqueous layer was extracted with DCM (10 mL x 3) and the combined organic layers were dried over  $\text{MgSO}_4$  and the solvents removed. The aqueous layer was then rotovaped, triturated with DCM and the organic solvent removed. The combined crude product was purified by column chromatography using 100:1 to 10:1 DCM: MeOH. Isolated 50.3 mg 1-ethyl-5,5-dimethylpyrazolidin-3-one (0.35 mmol, 95% recovery) and 88.9 mg of thioester (0.35 mmol, 98% yield), 93% ee. [Daicel Chiracel OJ-H, 3% MeOH, 3 mL/min, 249 nm;  $t_1$  = 5.36 min,  $t_2$  = 6.14 min].  $[\alpha]_D^{22}$  -1.9 (c1.155,  $\text{CH}_2\text{Cl}_2$ ). IR (thin film): 2963, 2872, 1685, 1599, 1506  $\text{cm}^{-1}$ ;  $^1\text{H}$  NMR (500 MHz,  $\text{CDCl}_3$ )  $\delta$  7.22 (dd,  $J$  = 8.9, 7.1 Hz, 2H), 6.74 – 6.65 (m, 3H), 3.26 (dd,  $J$  = 14.5, 7.3 Hz, 1H), 3.08 (dd,  $J$  = 14.5, 7.6 Hz, 1H), 2.94 (s, 3H), 2.87 (q,  $J$  = 7.4 Hz, 2H), 2.62 (dd,  $J$  = 14.5, 5.5 Hz, 1H), 2.56 – 2.46 (m, 1H), 2.40 (dd,  $J$  = 14.5, 8.0 Hz, 1H), 1.24 (t,  $J$  = 7.4 Hz, 3H), 0.98 (d,  $J$  = 6.6 Hz, 3H);  $^{13}\text{C}$  NMR (125 MHz,  $\text{CDCl}_3$ )  $\delta$  198.8, 149.6, 129.1, 116.2, 112.1, 58.8, 48.8, 39.2, 30.5, 23.4, 17.6, 14.8. HRMS ( $\text{ESI}^+$ ) calc'd for  $[\text{C}_{14}\text{H}_{21}\text{NOS}+\text{H}]^+$  requires  $m/z$  252.1417, found  $m/z$  252.1417.

## VI. Synthesis of Compounds for X-Ray Structures

**(R)-S-Ethyl-4-((4-bromophenyl)(methyl)amino)-3-(4-methoxyphenyl)butanethioate.** A solution of ethanethiol (38  $\mu$ L, 0.52 mmol, 2.0 equiv) in THF (4 mL) was cooled to  $-78$   $^{\circ}$ C, and *n*-BuLi (1.6 M in hexane, 0.28 mL, 1.5 equiv) was added. The reaction was stirred at  $0$   $^{\circ}$ C for 30 min. A solution of (R)-2-(4-((4-bromophenyl)(methyl)amino)-3-(4-methoxyphenyl)butanoyl)-1-ethyl-5,5-dimethylpyrazolidin-3-one (131.0 mg, 0.26 mmol, 1 equiv) in THF (4 mL) was then added. The reaction was stirred at  $0$   $^{\circ}$ C for 10 min. The reaction was then quenched with saturated  $\text{NH}_4\text{Cl}$  (5 mL) and the phases separated. The aqueous layer was extracted with  $\text{Et}_2\text{O}$  (10 mL x 3) and the combined organic layers were dried over  $\text{MgSO}_4$  and the solvents removed by rotary evaporation. The crude product was purified by column chromatography using 70:30 hexanes: EtOAc. Isolated 102.0 mg of thioester (0.24 mmol, 93% yield), 94% ee. [Daicel Chiracel AD-H, 5 to 50% *i*-PrOH, 3 mL/min, 249 nm;  $t_1$  = 6.96 min,  $t_2$  = 7.72 min].  $[\alpha]_{\text{D}}^{22} + 86.5$  (c1.068,  $\text{CH}_2\text{Cl}_2$ ). IR (thin film): 2930, 2832, 1679, 1609, 1588  $\text{cm}^{-1}$ ;  $^1\text{H}$  NMR (500 MHz,  $\text{CDCl}_3$ )  $\delta$  7.28 (d,  $J$  = 9.0 Hz, 2H), 7.06 (d,  $J$  = 8.6 Hz, 2H), 6.82 (d,  $J$  = 8.6 Hz, 2H), 6.52 (d,  $J$  = 9.0 Hz, 2H), 3.78 (s, 4H), 3.66 (dd,  $J$  = 14.5, 6.6 Hz, 1H), 3.62 – 3.53 (m, 3H), 3.22 (dd,  $J$  = 14.5, 8.3 Hz, 1H), 2.96 – 2.85 (m, 2H), 2.82 (qd,  $J$  = 7.5, 3.1 Hz, 3H), 2.60 (s, 3H), 1.18 (t,  $J$  = 7.4 Hz, 4H);  $^{13}\text{C}$  NMR (125 MHz,  $\text{CDCl}_3$ )  $\delta$  197.8, 158.6, 147.8, 133.5, 131.8, 128.6, 114.0, 113.6, 108.1, 59.0, 55.2, 47.6, 39.8, 39.5, 23.4, 14.7. HRMS (ESI $^+$ ) calc'd for  $[\text{C}_{20}\text{H}_{24}\text{BrNO}_2\text{S}+\text{H}]^+$  requires  $m/z$  422.0784, found  $m/z$  422.0782.

**(S)-1-Phenylethanaminium (R)-4-((4-bromophenyl)(methyl)amino)-3-(4-methoxyphenyl)butanoate.** A solution of (R)-S-ethyl 4-((4-bromophenyl)(methyl)amino)-3-(4-methoxyphenyl)butanethioate (83.1 mg, 0.20 mmol, 1 equiv) in MeOH (3 mL) and 1 M NaOH (1.5 mL) was stirred at room temperature overnight. After that time, the solution was acidified to pH 4 with 10% citric acid. The resulting mixture was extracted with DCM (5 mL x 3) and the combined organic layers were dried over  $\text{MgSO}_4$ . The solvent was then removed by rotary evaporation. The crude product was dissolved in DCM (3 mL) and (S)-1-phenylethaneamine (21  $\mu$ L, 0.17 mmol, 1 equiv) was added. The resulting mixture was stirred overnight. After that time, the solvent was removed by rotary evaporation to obtain 77.6 mg (0.16 mmol, 78% yield over two steps) of the desired salt.  $[\alpha]_{\text{D}}^{22} + 121.7$  (c1.035,  $\text{CHCl}_3$ ). IR (thin film): 2924, 2890, 1606, 1590, 1555  $\text{cm}^{-1}$ ;  $^1\text{H}$  NMR (500 MHz,  $\text{CDCl}_3$ )  $\delta$  7.29 – 7.19 (m, 7H), 6.98 (d,  $J$  = 8.5 Hz, 2H), 6.76 (d,  $J$  = 8.5 Hz, 2H), 6.53 (d,  $J$  = 9.0 Hz, 2H), 5.79 (*br s*, 3H), 4.06 – 3.93 (m, 1H), 3.73 (s, 3H), 3.58 (dd,  $J$  = 14.6, 6.2 Hz, 1H), 3.45 – 3.33 (m, 1H), 3.06 (dd,  $J$  = 14.6, 8.8 Hz, 1H), 2.52 (s, 3H), 2.47 – 2.32 (m, 2H), 1.35 (d,  $J$  = 6.6 Hz, 3H);  $^{13}\text{C}$  NMR (125 MHz,  $\text{CDCl}_3$ )  $\delta$  176.23, 158.4, 147.9, 144.9, 134.2, 131.7, 128.7, 128.6, 127.4, 125.8, 113.9, 113.6, 107.9, 59.5, 6.2, 51.1, 39.6, 39.4, 38.7, 24.0. HRMS (ESI $^-$ ) calc'd for  $[\text{C}_{12}\text{H}_{15}\text{BrNO}_2]^-$  requires  $m/z$  284.0291, found  $m/z$  284.0292. (mp = 160–163  $^{\circ}$ C).

**(S)-S-Ethyl 4-((4-bromophenyl)(methyl)amino)-3-methylbutanethioate.** A solution of ethanethiol (53  $\mu$ L, 0.72 mmol, 2.0 equiv) in THF (5 mL) was cooled to  $-78$   $^{\circ}$ C, and *n*-BuLi (1.6 M in hexane, 0.39 mL, 1.5 equiv) was added. The reaction was stirred at  $0$   $^{\circ}$ C for 30 min. A solution of (S)-2-(4-((4-bromophenyl)(methyl)amino)-3-methylbutanoyl)-1-ethyl-5,5-dimethylpyrazolidin-3-one (149.4 mg, 0.36 mmol, 1 equiv) in THF (5 mL) was then added. The reaction was stirred at  $0$   $^{\circ}$ C for 10 min. The reaction was then quenched with saturated  $\text{NH}_4\text{Cl}$  (5 mL) and the phases separated. The aqueous layer was extracted with  $\text{Et}_2\text{O}$  (10 mL x 3) and the combined organic layers were dried over  $\text{MgSO}_4$  and the solvents removed by rotary evaporation. The crude product was purified by column chromatography using 70:30 hexanes: EtOAc. Isolated 84.5 mg of thioester (0.26 mmol, 85% yield),  $[\alpha]_{\text{D}}^{22} - 5.9$  (c1.003,  $\text{CH}_2\text{Cl}_2$ ). IR (thin film): 2962, 2871, 1680, 1589, 1496  $\text{cm}^{-1}$ ;  $^1\text{H}$  NMR (500 MHz,  $\text{CDCl}_3$ )  $\delta$  7.28 (d,  $J$  = 9.1 Hz, 2H), 6.56 (d,  $J$  = 9.0 Hz, 2H), 3.25 (dd,  $J$  = 14.6, 7.1 Hz, 1H), 3.05 (dd,  $J$  = 14.6, 7.6 Hz, 1H), 2.91 (s, 3H), 2.87 (q,  $J$  = 7.4 Hz, 2H), 2.57 (dd,  $J$  =

14.3, 5.7 Hz, 1H), 2.49 (dq,  $J = 13.5, 6.9$  Hz, 1H), 2.40 (dd,  $J = 14.3, 7.4$  Hz, 1H), 1.24 (t,  $J = 7.4$  Hz, 3H), 0.96 (d,  $J = 6.5$  Hz, 3H);  $^{13}\text{C}$  NMR (125 MHz,  $\text{CDCl}_3$ )  $\delta$  198.6, 148.5, 131.7, 113.7, 108.1, 58.6, 48.7, 39.4, 30.3, 23.4, 17.7, 14.8. HRMS (ESI $^+$ ) calc'd for  $[\text{C}_{14}\text{H}_{20}\text{BrNOS}+\text{H}]^+$  requires  $m/z$  330.0522, found  $m/z$  330.0525.

**(S)-1-Phenylethanaminium (S)-4-((4-bromophenyl)(methyl)amino)-3-methylbutanoate.**

A solution of (S)-S-ethyl 4-((4-bromophenyl)(methyl)amino)-3-methylbutanethioate (84.5 mg, 0.26 mmol, 1 equiv) in MeOH (4 mL) and 1 M NaOH (2.0 mL) was stirred at room temperature overnight. After that time, the solution was acidified to pH 4 with 10% citric acid. The resulting mixture was extracted with DCM (5 mL x 3) and the combined organic layers were dried over  $\text{MgSO}_4$ . The solvent was then removed by rotary evaporation. The crude product was dissolved in DCM (3 mL) and (S)-1-phenylethylamine (33

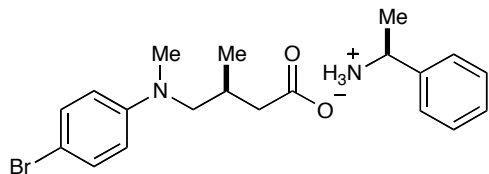

$\mu\text{L}$ , 0.26 mmol, 1 equiv) was added. The resulting mixture was stirred overnight. After that time, the solvent was removed by rotary evaporation to obtain 98.7 mg (0.24 mmol, 93% yield over two steps) of the desired salt.  $[\alpha]_{\text{D}}^{22} - 2.6$  (c0.995,  $\text{CH}_2\text{Cl}_2$ ). IR (thin film): 2927, 2870, 1588, 1556, 1497  $\text{cm}^{-1}$ ;  $^1\text{H}$  NMR (500 MHz,  $\text{CDCl}_3$ )  $\delta$  7.30 – 7.23 (m, 3H), 7.19 (t,  $J = 4.4$  Hz, 4H), 6.55 – 6.45 (m, 2H), 4.73 (s, 3H), 4.08 (q,  $J = 6.7$  Hz, 1H), 3.16 (dd,  $J = 14.6, 7.2$  Hz, 1H), 2.96 (dd,  $J = 14.6, 7.7$  Hz, 1H), 2.84 (s, 3H), 2.31 (h,  $J = 7.0$  Hz, 1H), 2.20 (dd,  $J = 15.3, 6.2$  Hz, 1H), 2.03 (dd,  $J = 15.4, 7.5$  Hz, 1H), 1.37 (d,  $J = 6.6$  Hz, 3H), 0.88 (d,  $J = 6.6$  Hz, 3H);  $^{13}\text{C}$  NMR (125 MHz,  $\text{CDCl}_3$ )  $\delta$  176.1, 147.5, 144.0, 130.7, 127.7, 126.4, 124.8, 112.7, 106.9, 57.9, 50.1, 39.0, 38.5, 28.5, 23.1, 16.9. HRMS (ESI $^-$ ) calc'd for  $[\text{C}_{18}\text{H}_{19}\text{BrNO}_3]^-$  requires  $m/z$  376.0553, found  $m/z$  376.0555. (mp = 166–168  $^\circ\text{C}$ ).

## VII. Spectra

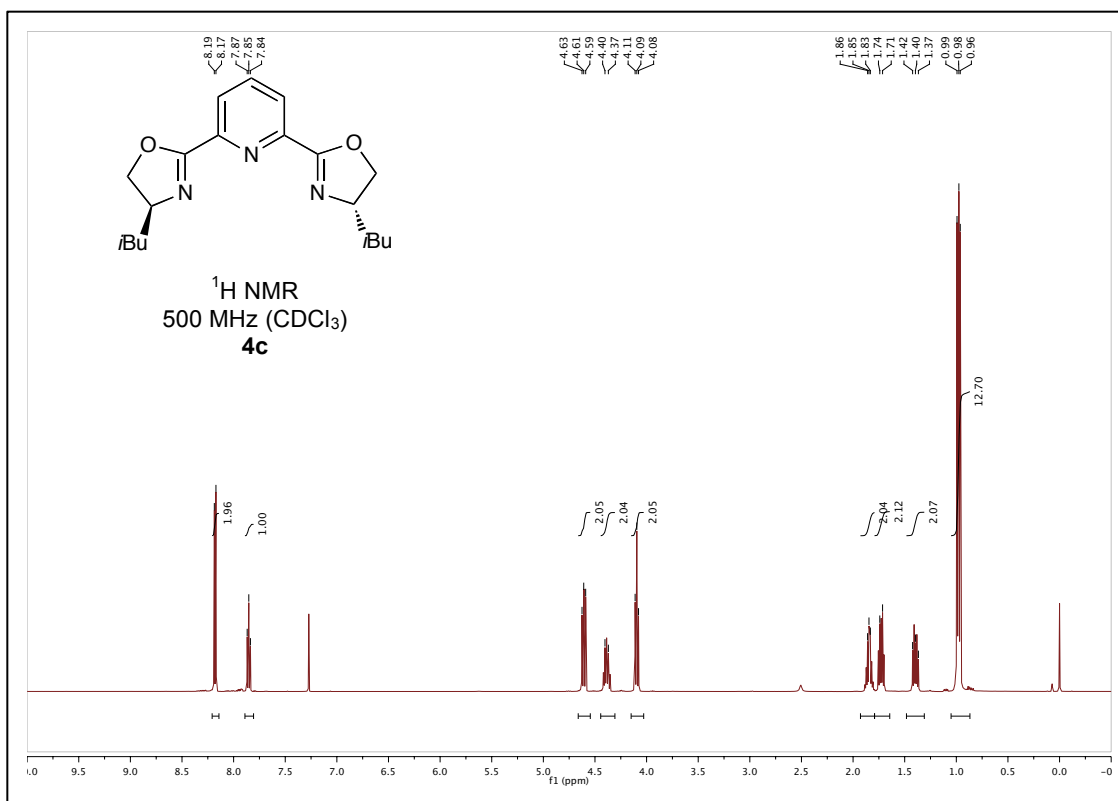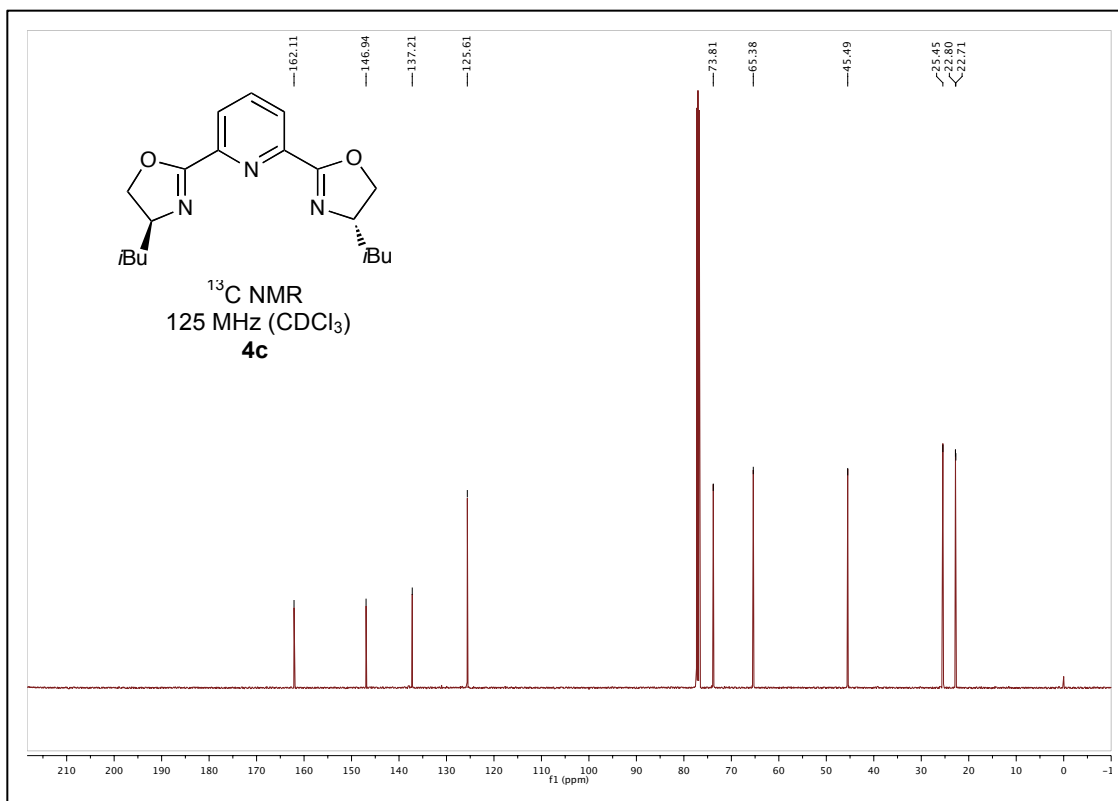

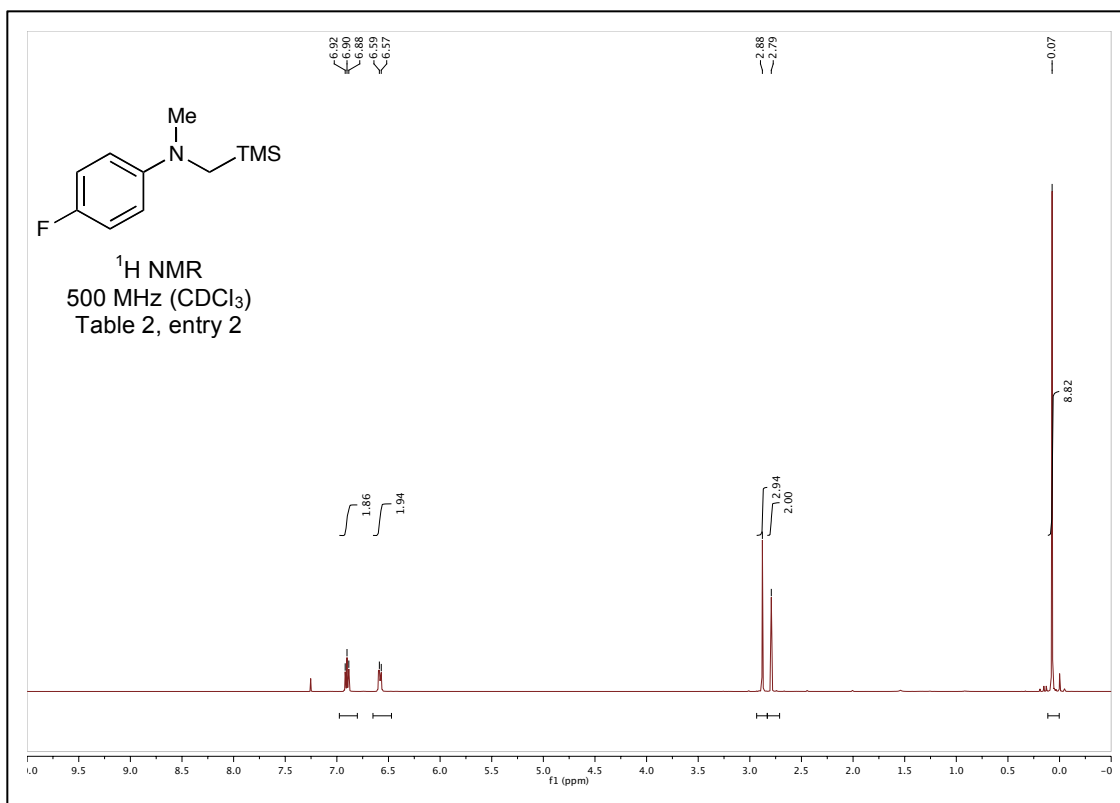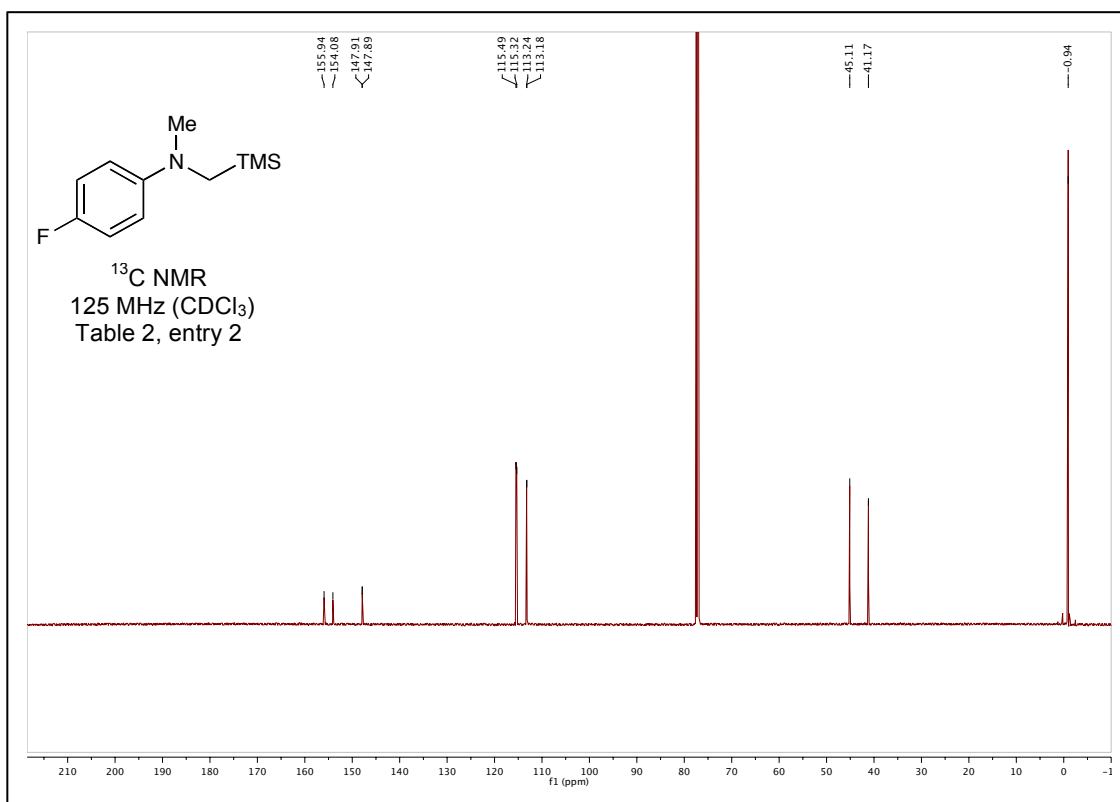

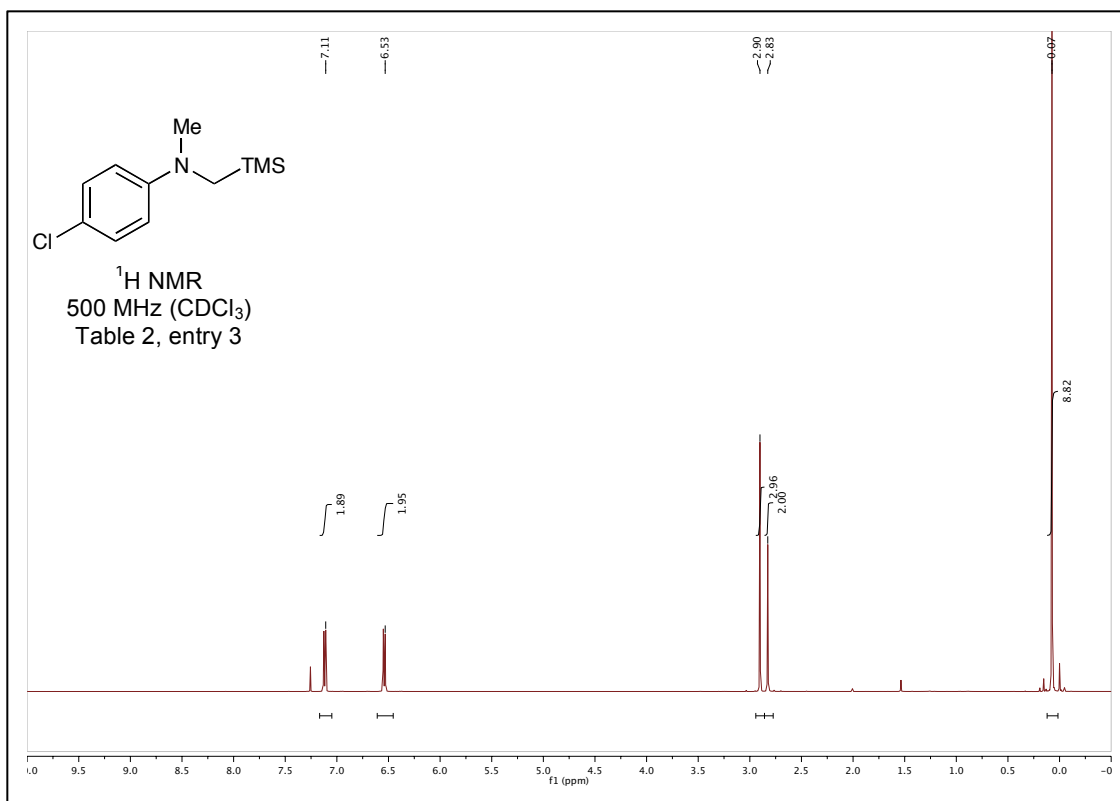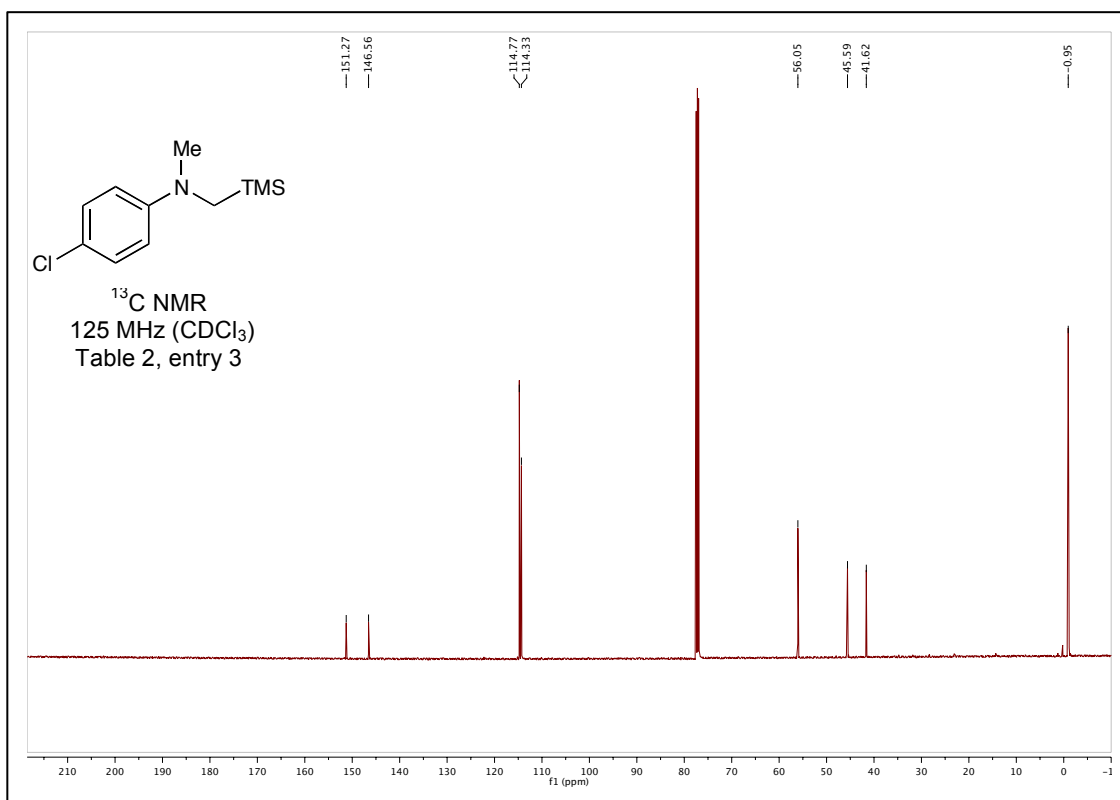

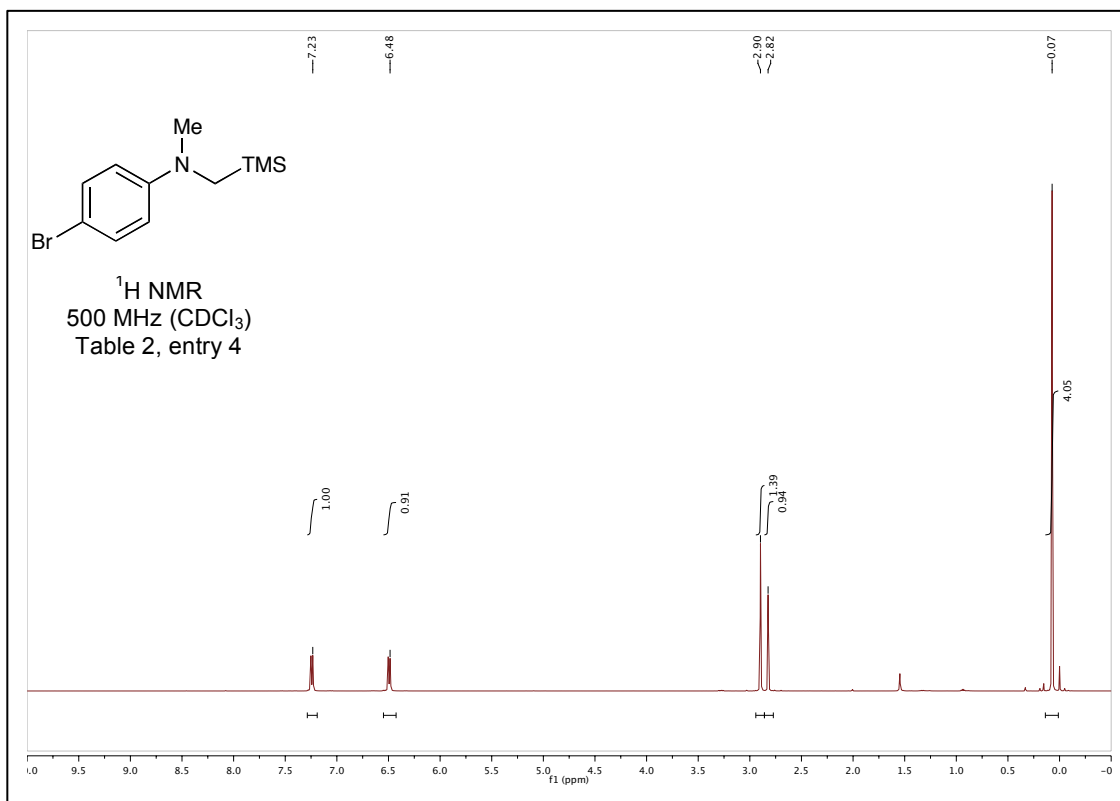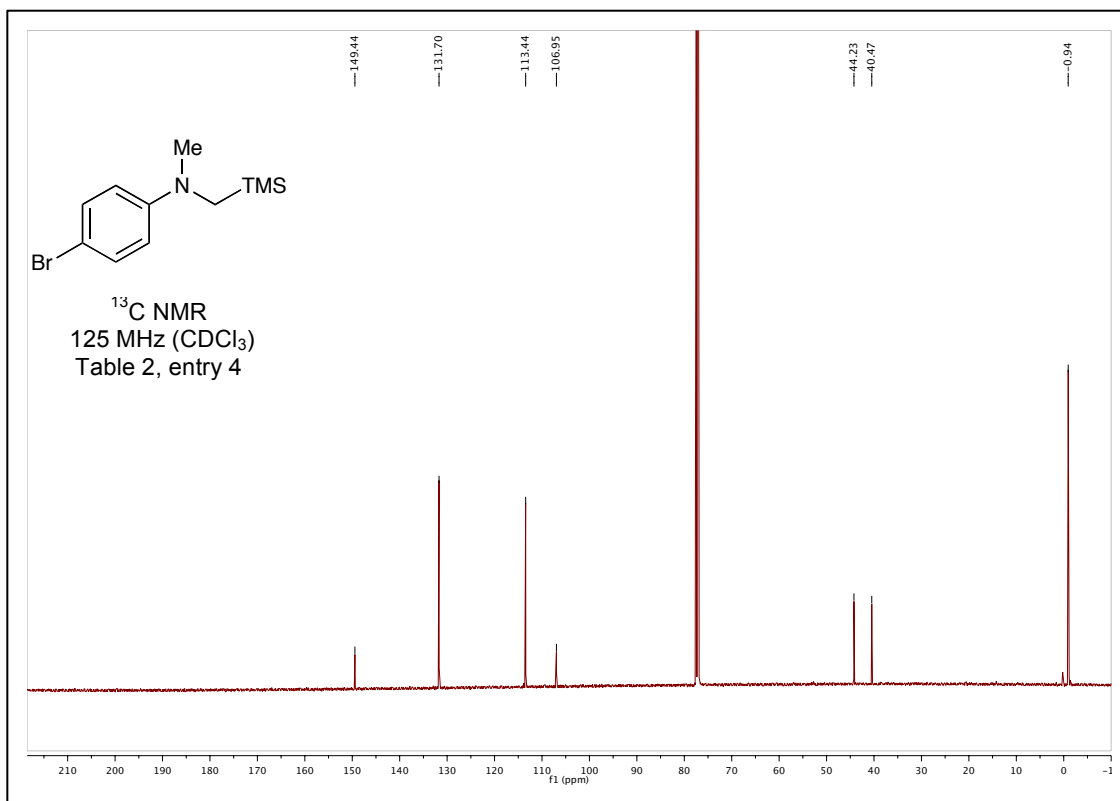

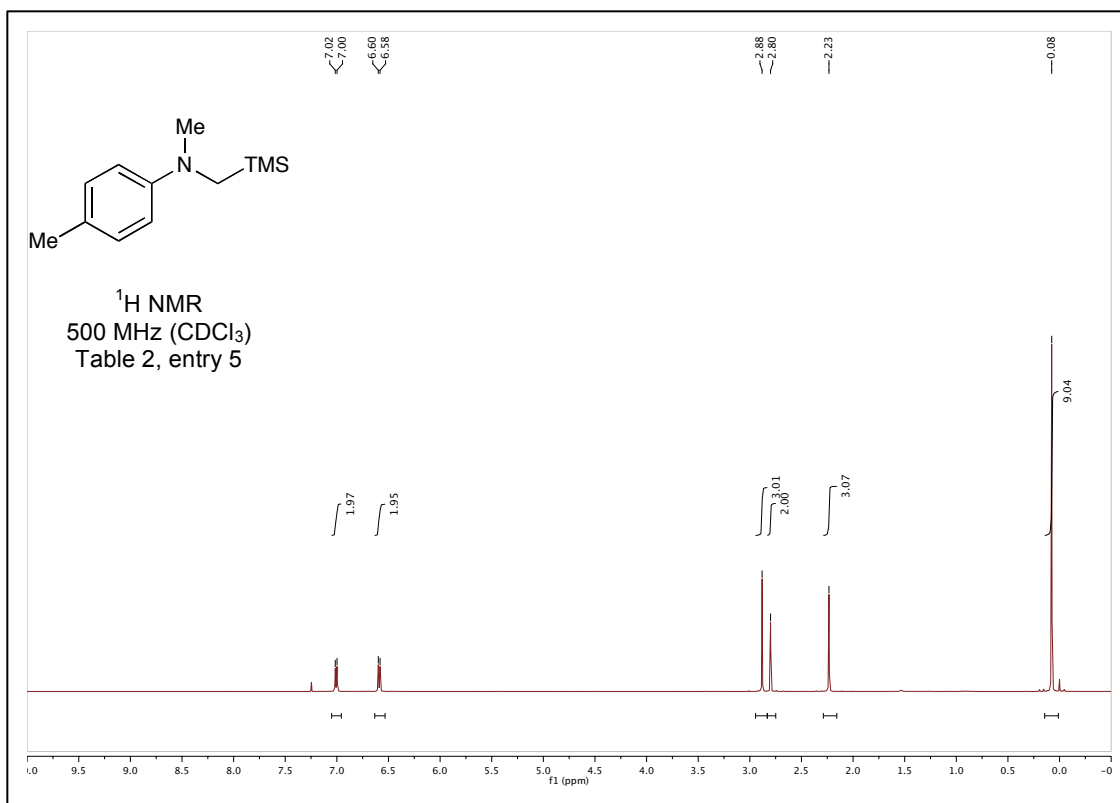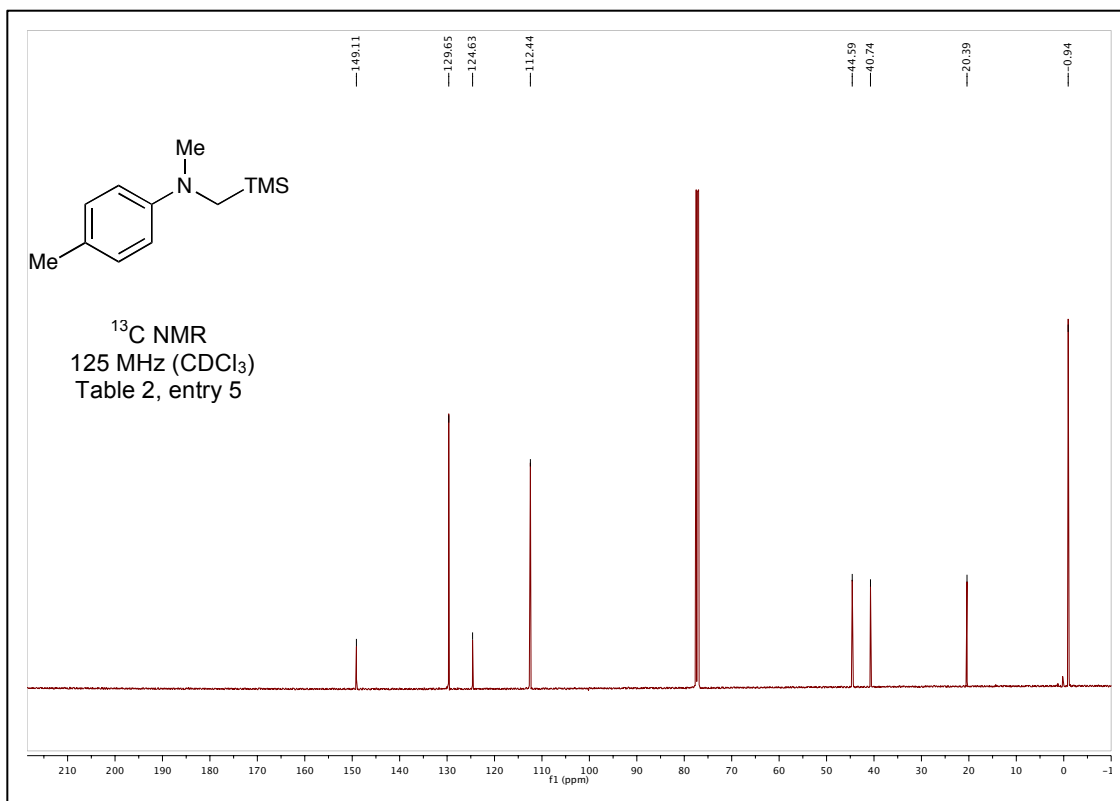



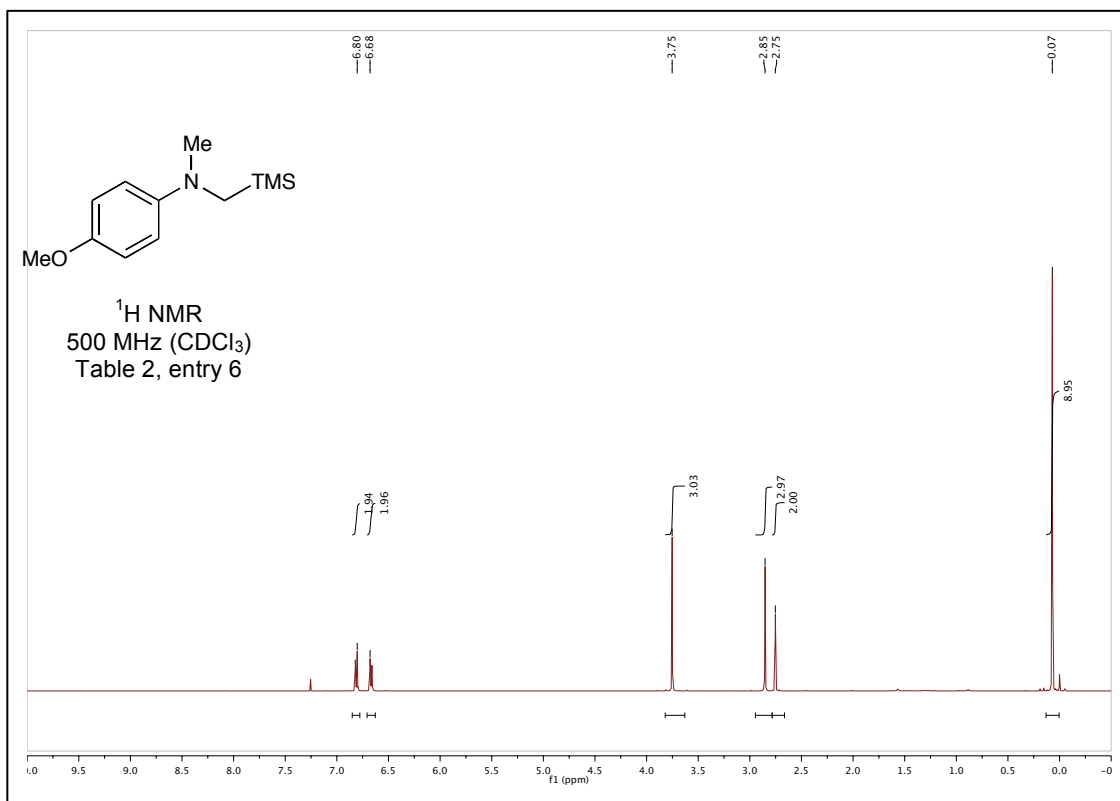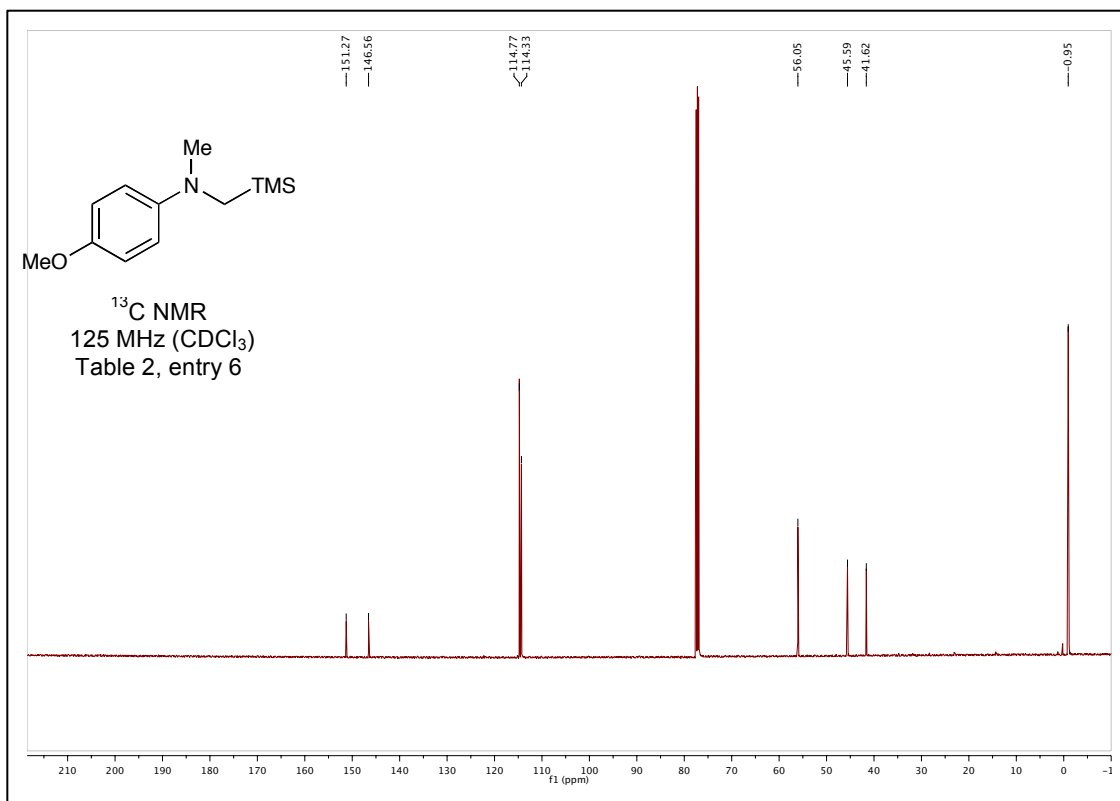

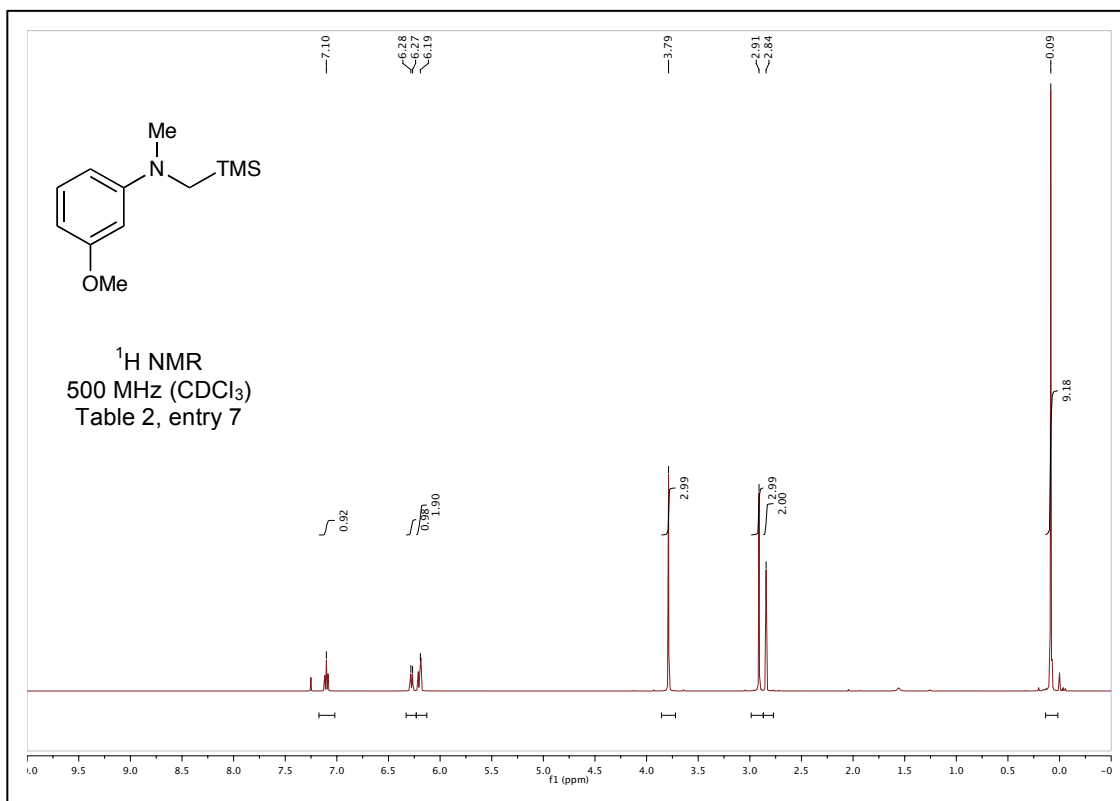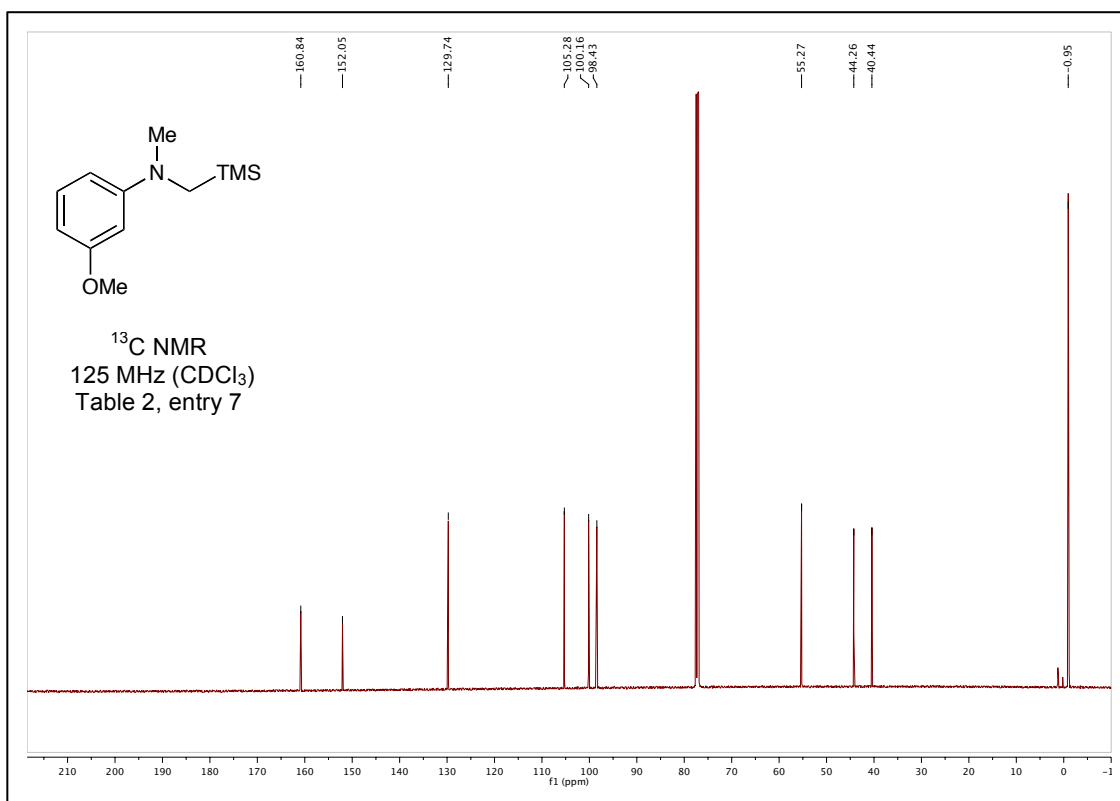

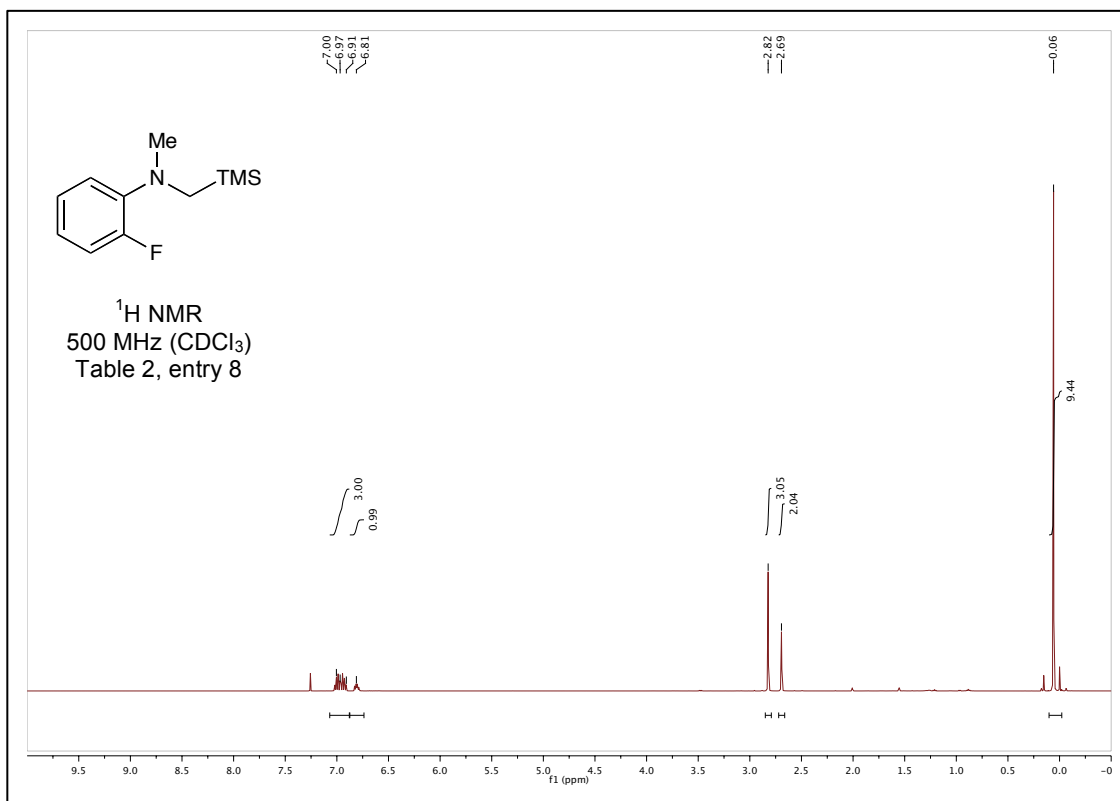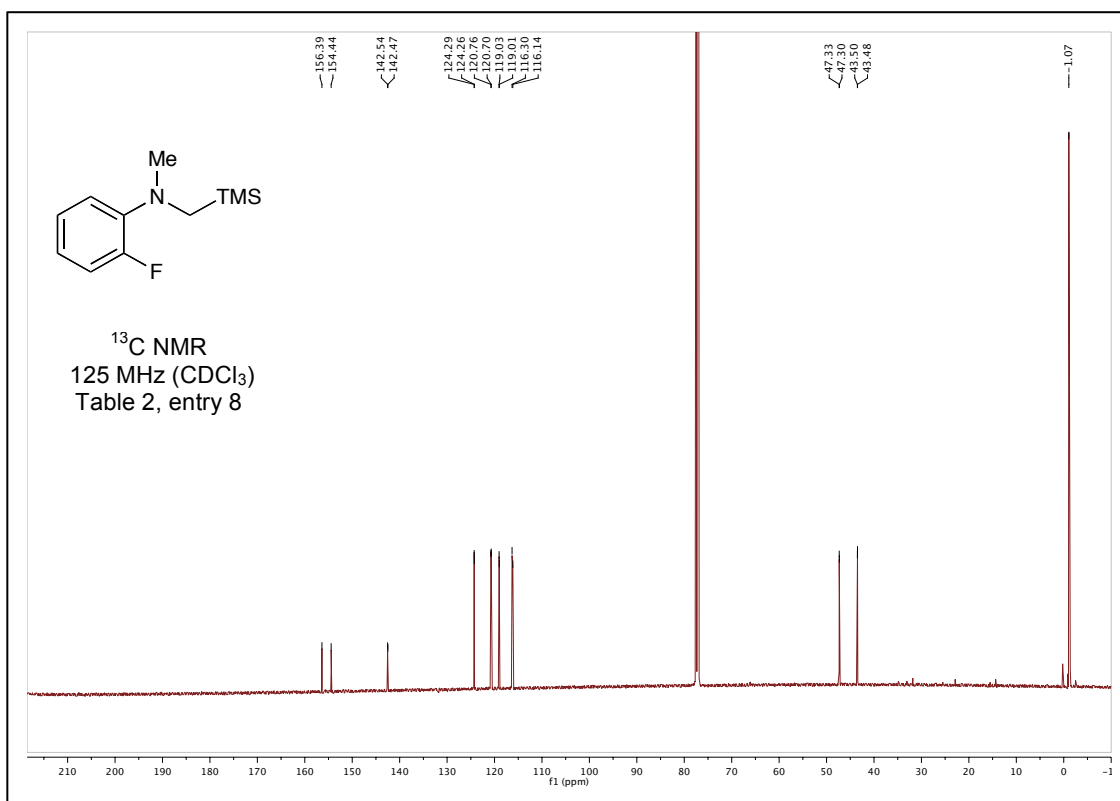

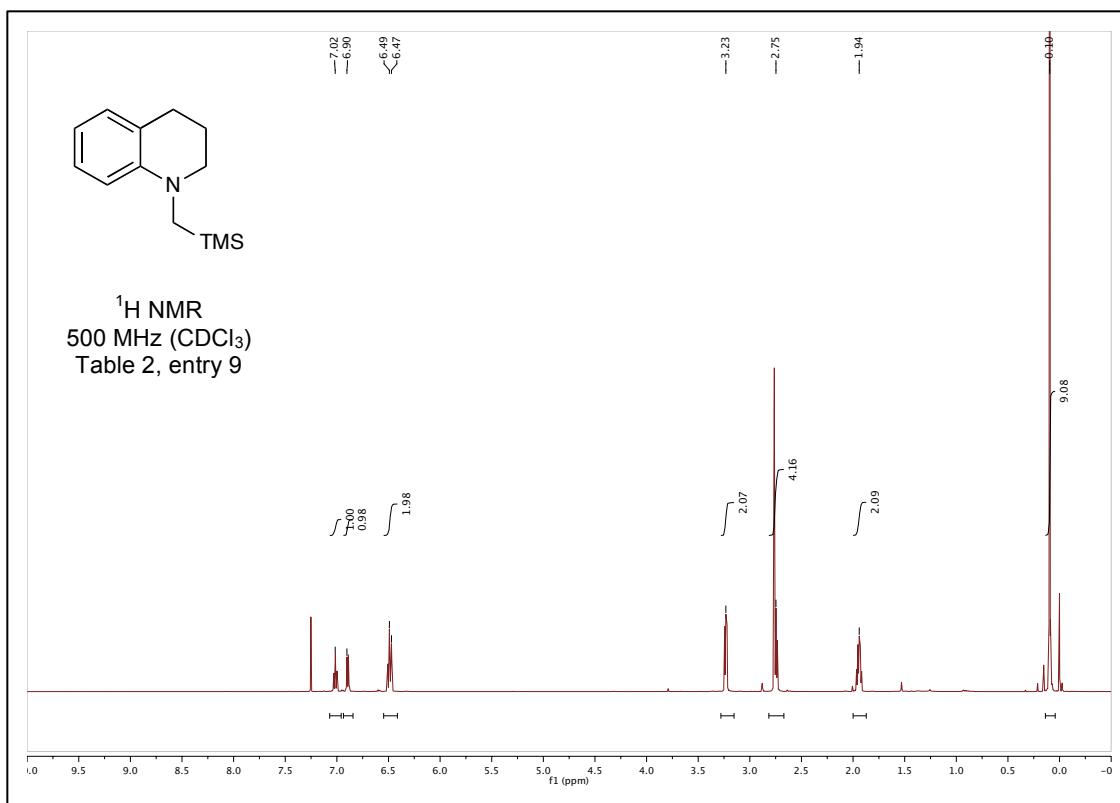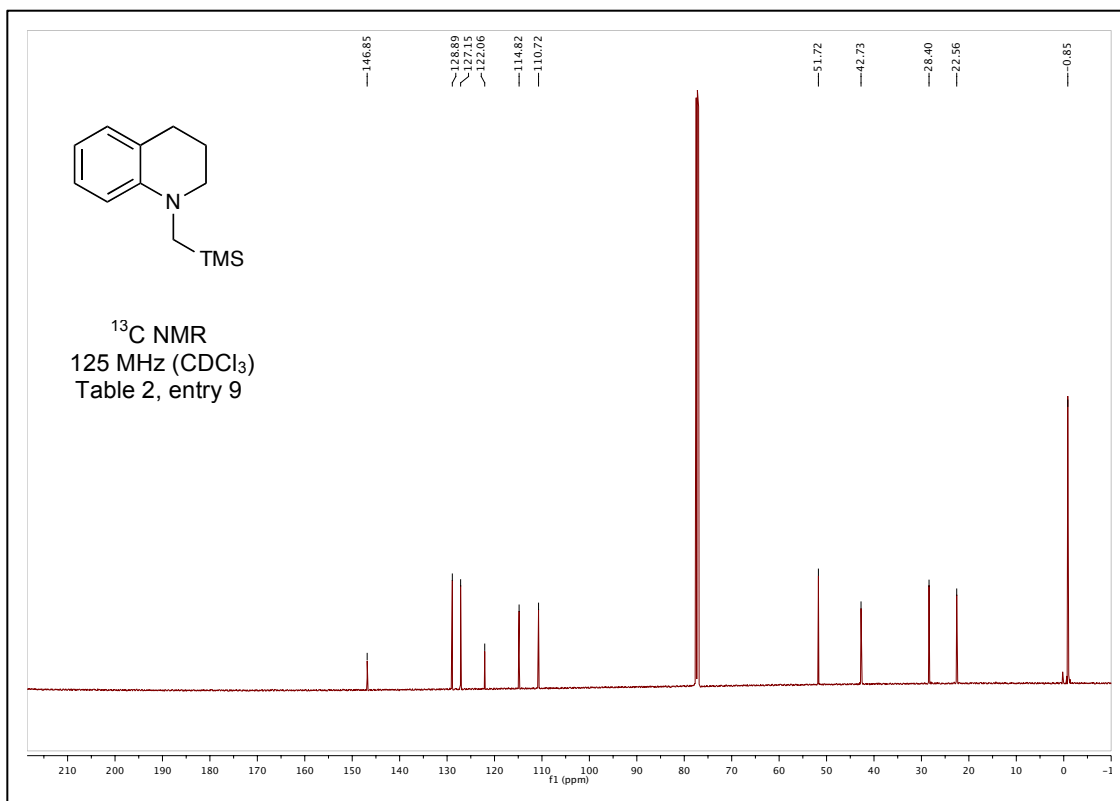

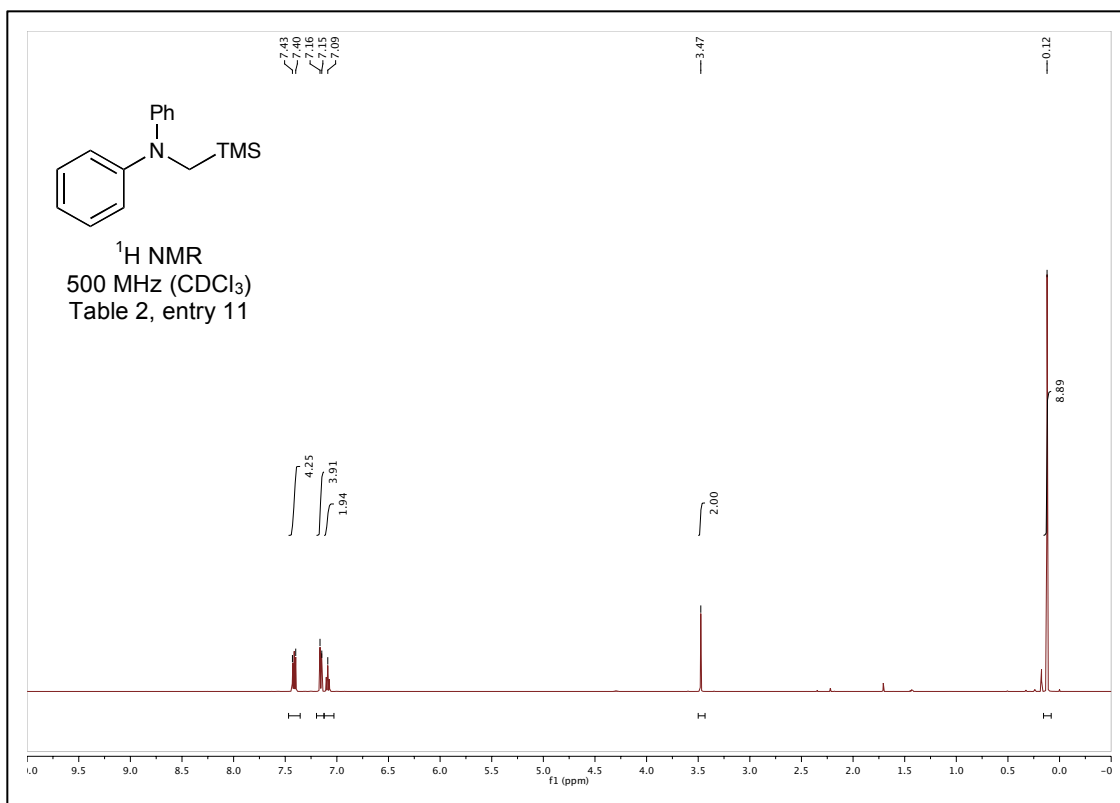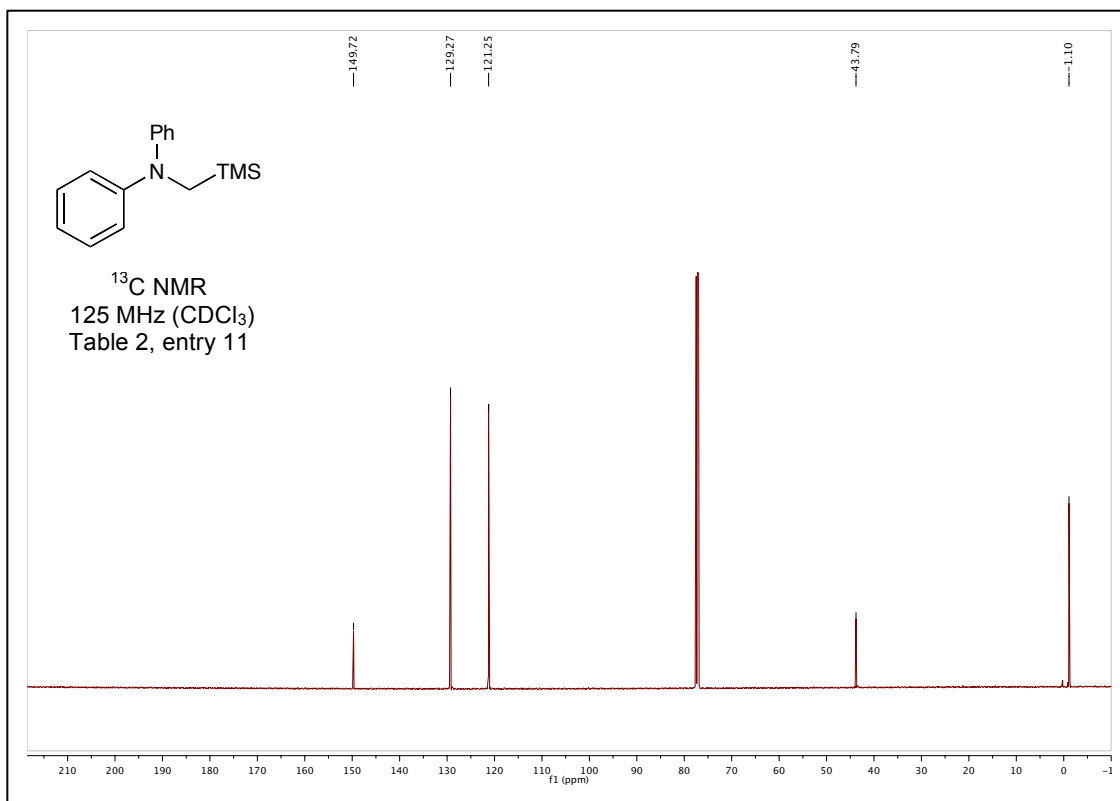

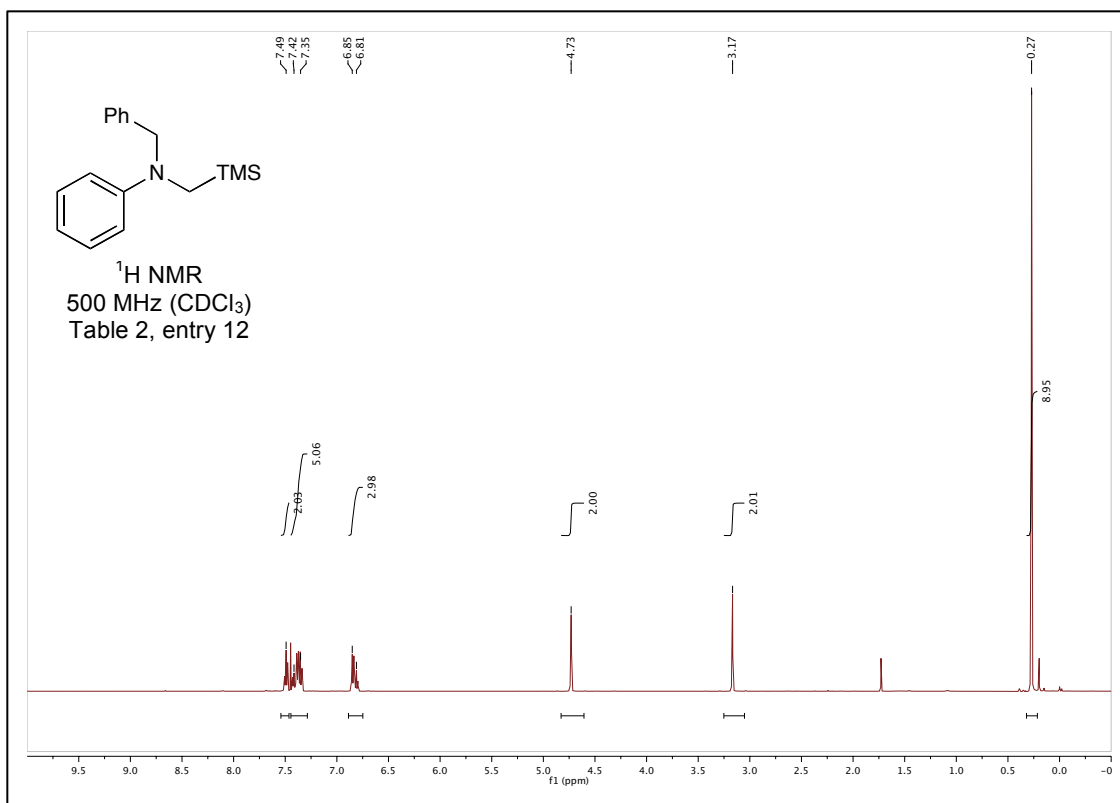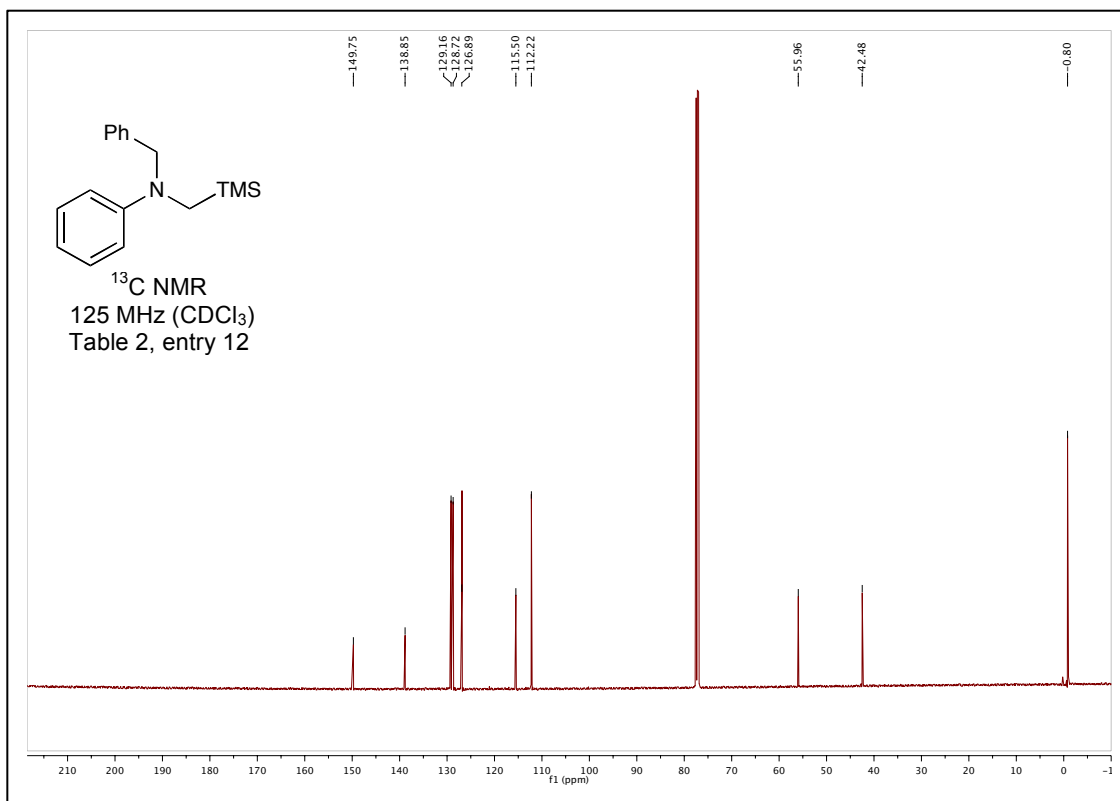

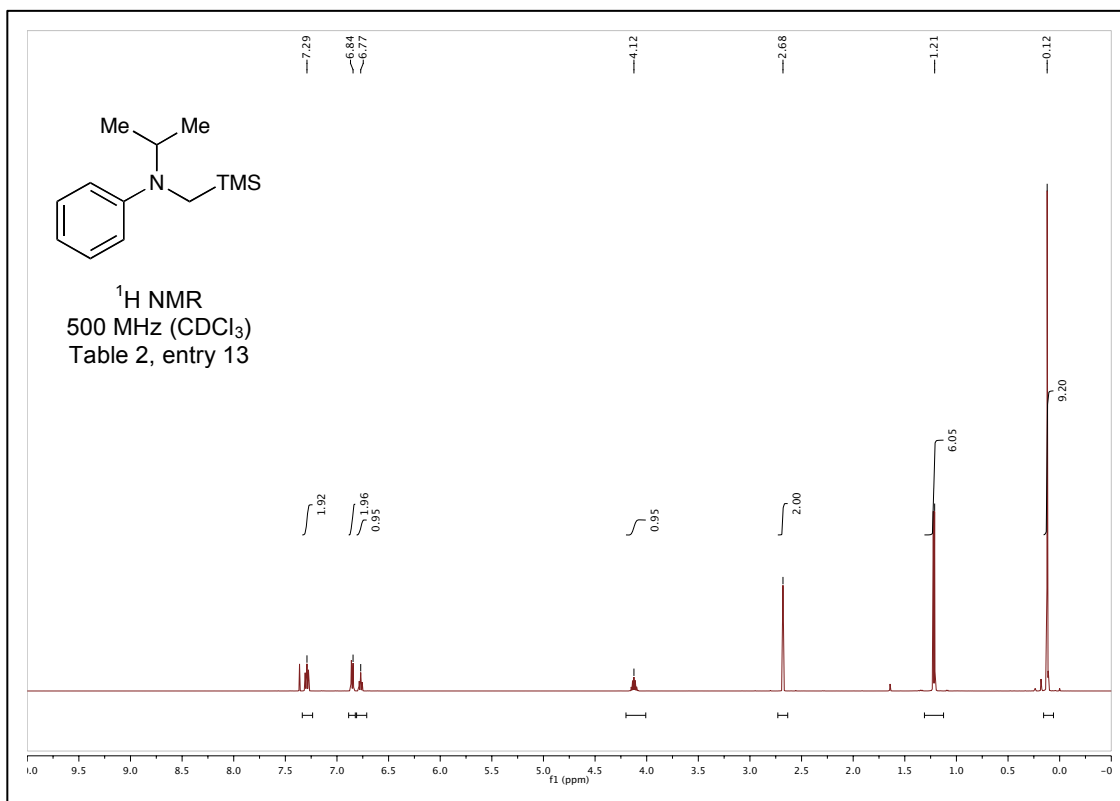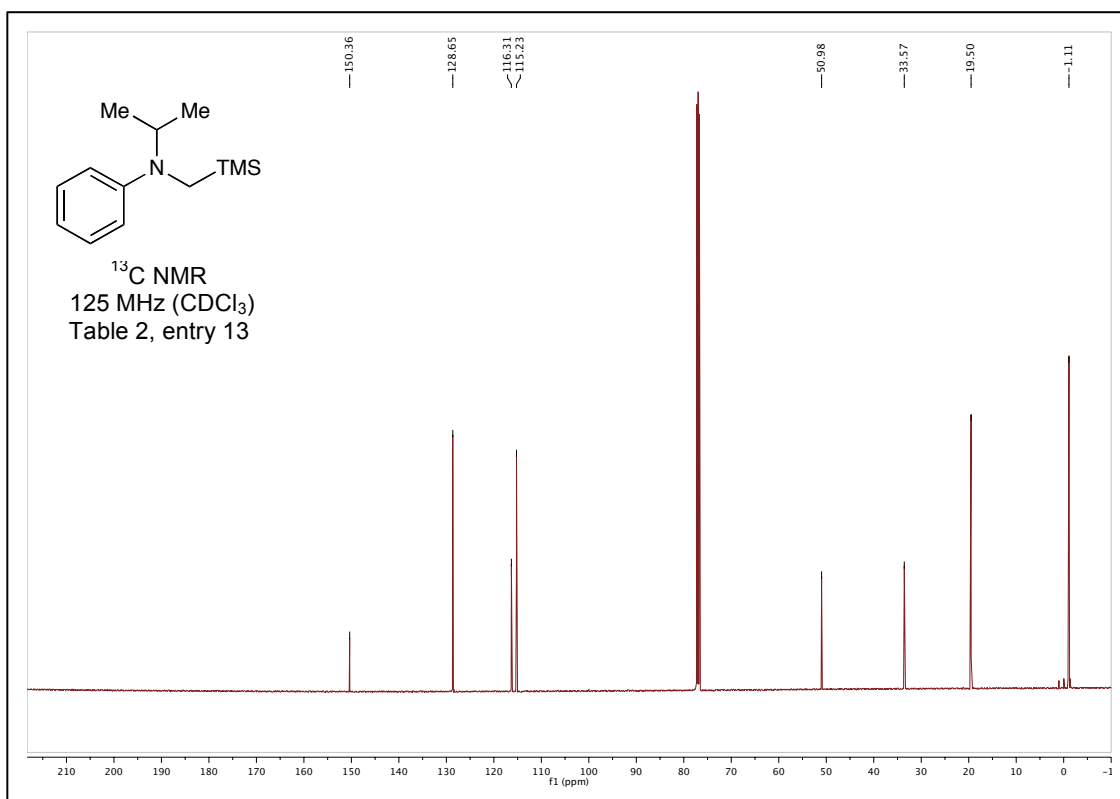

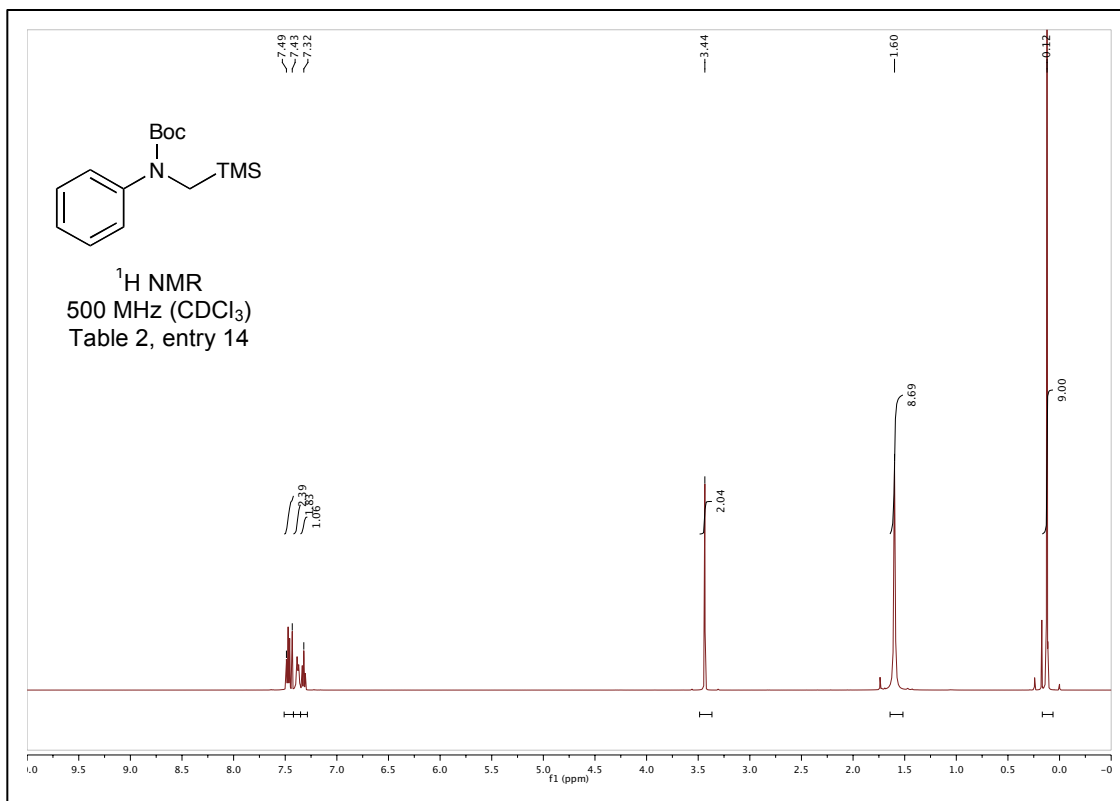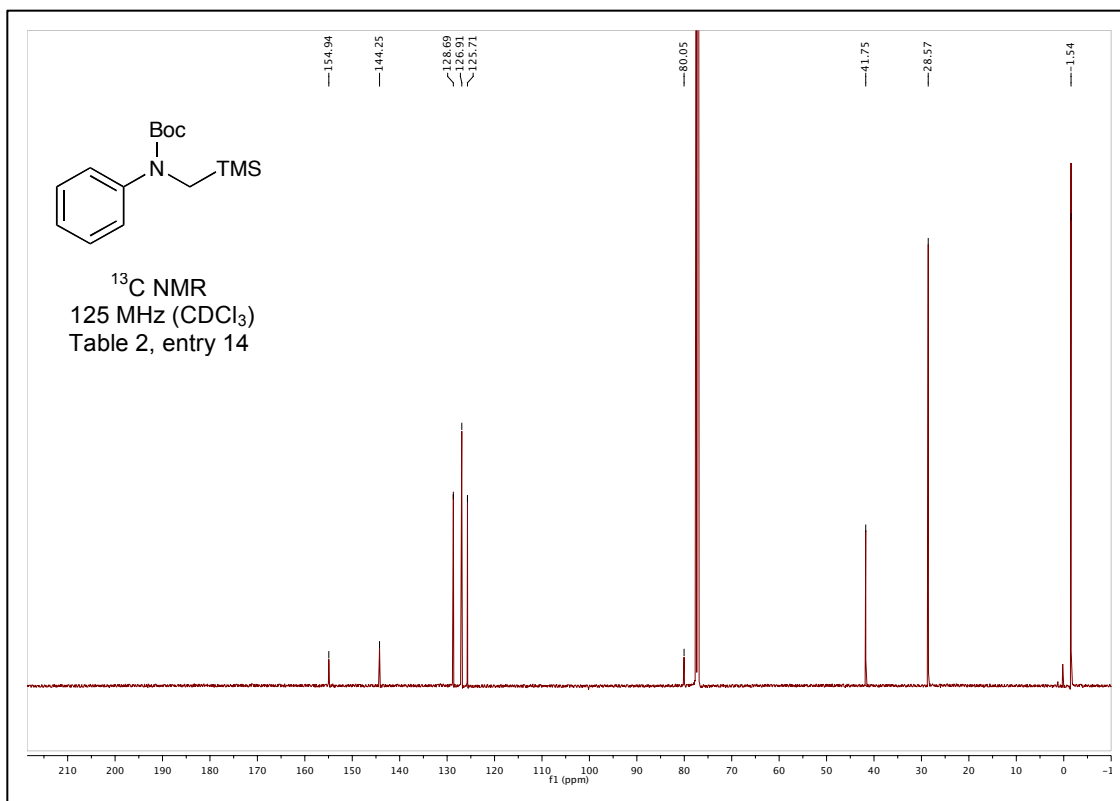



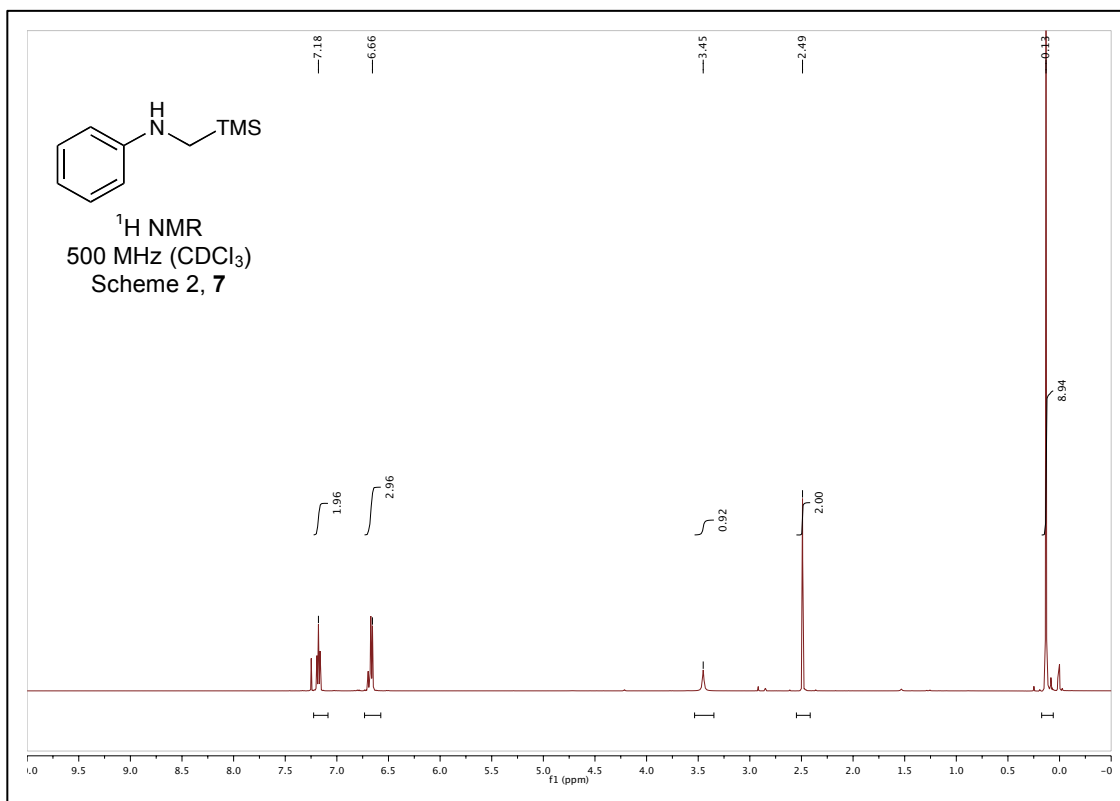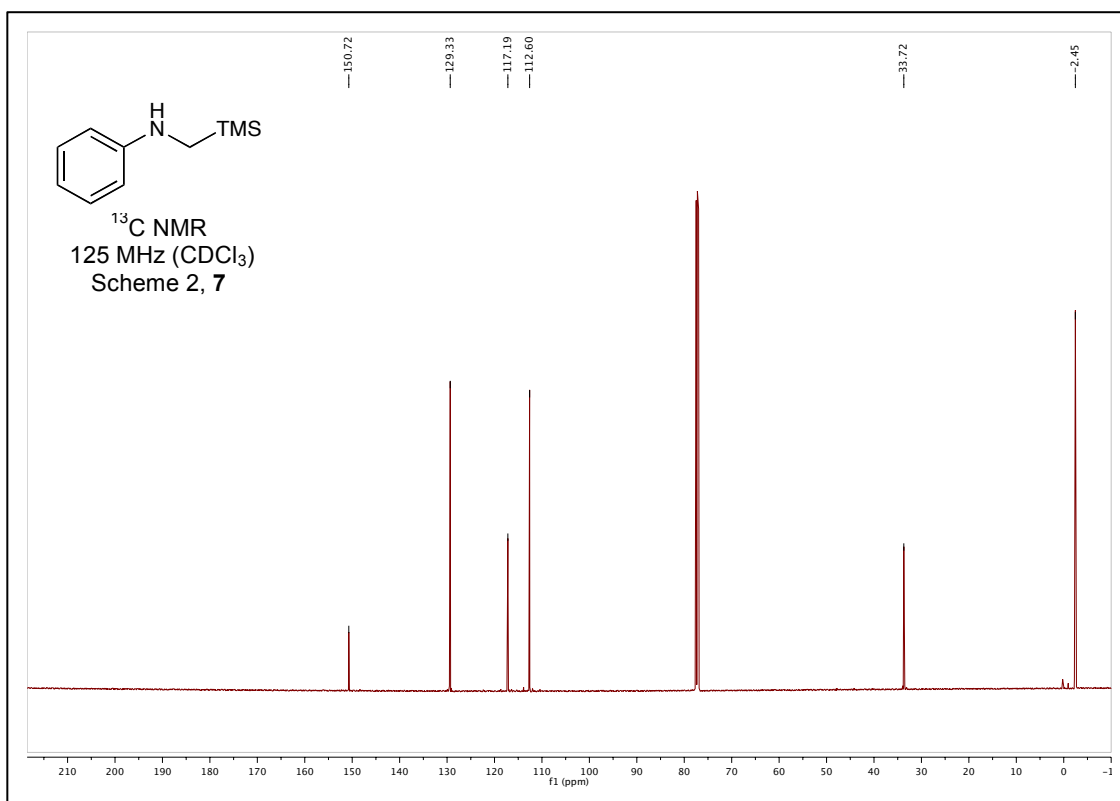

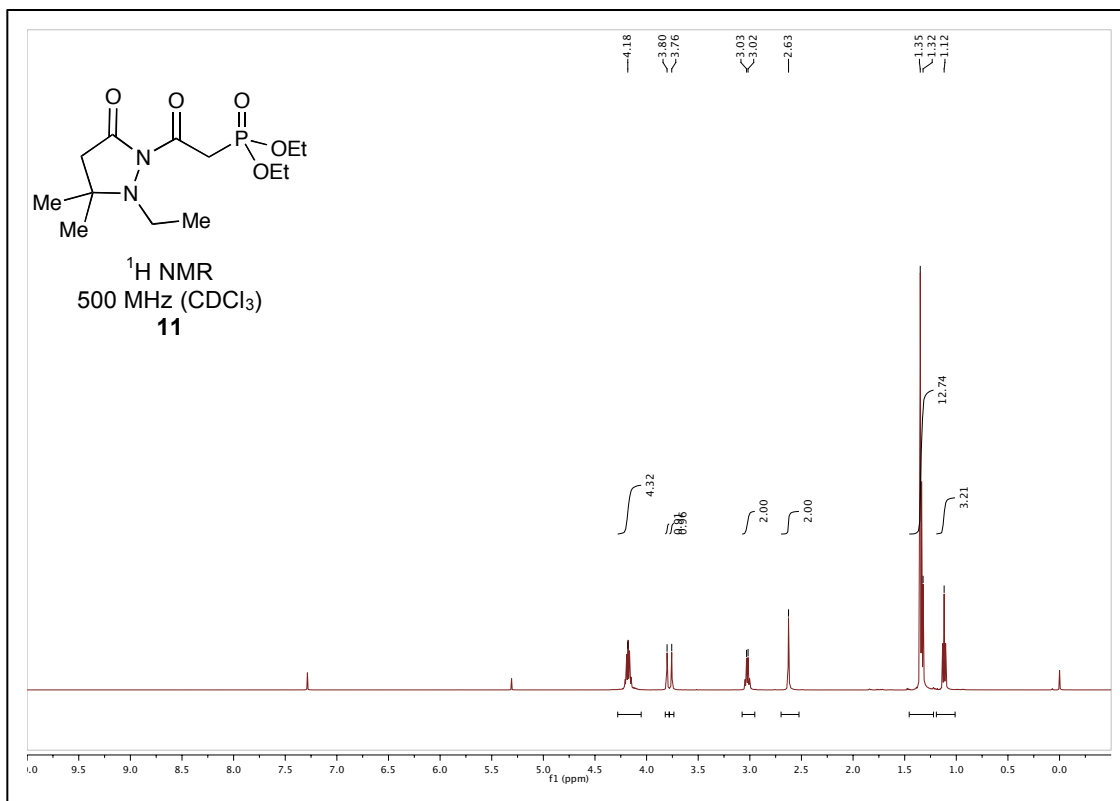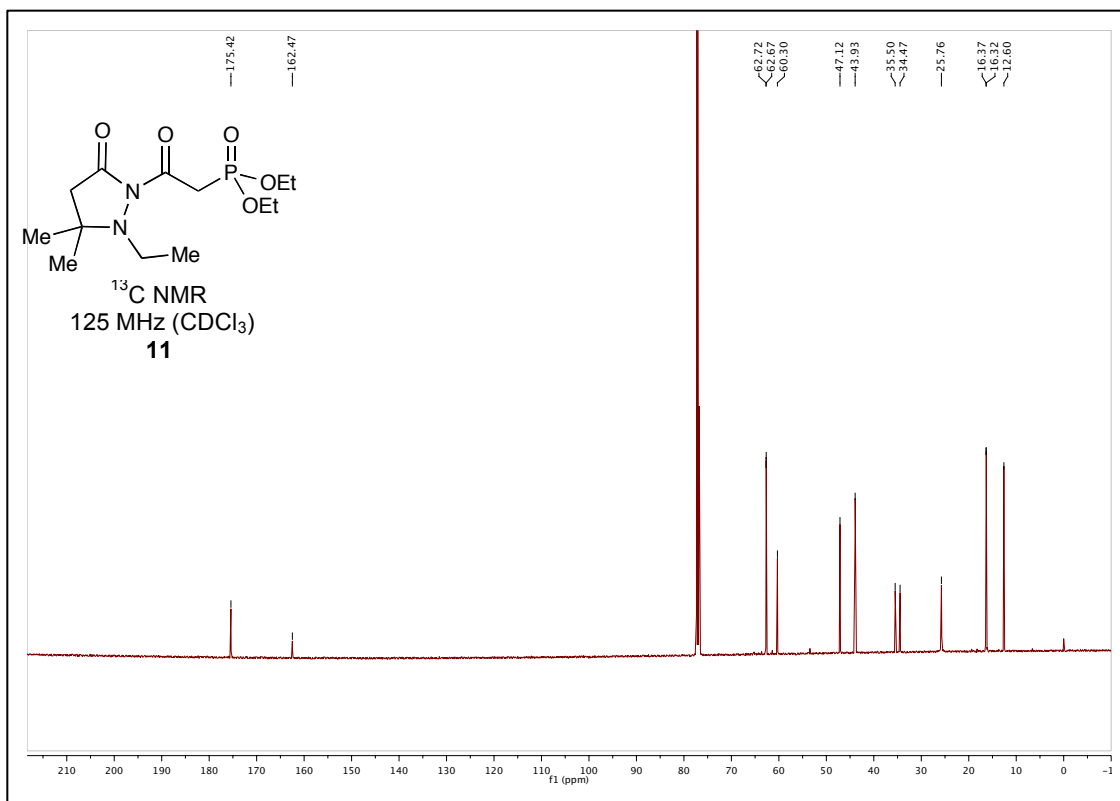

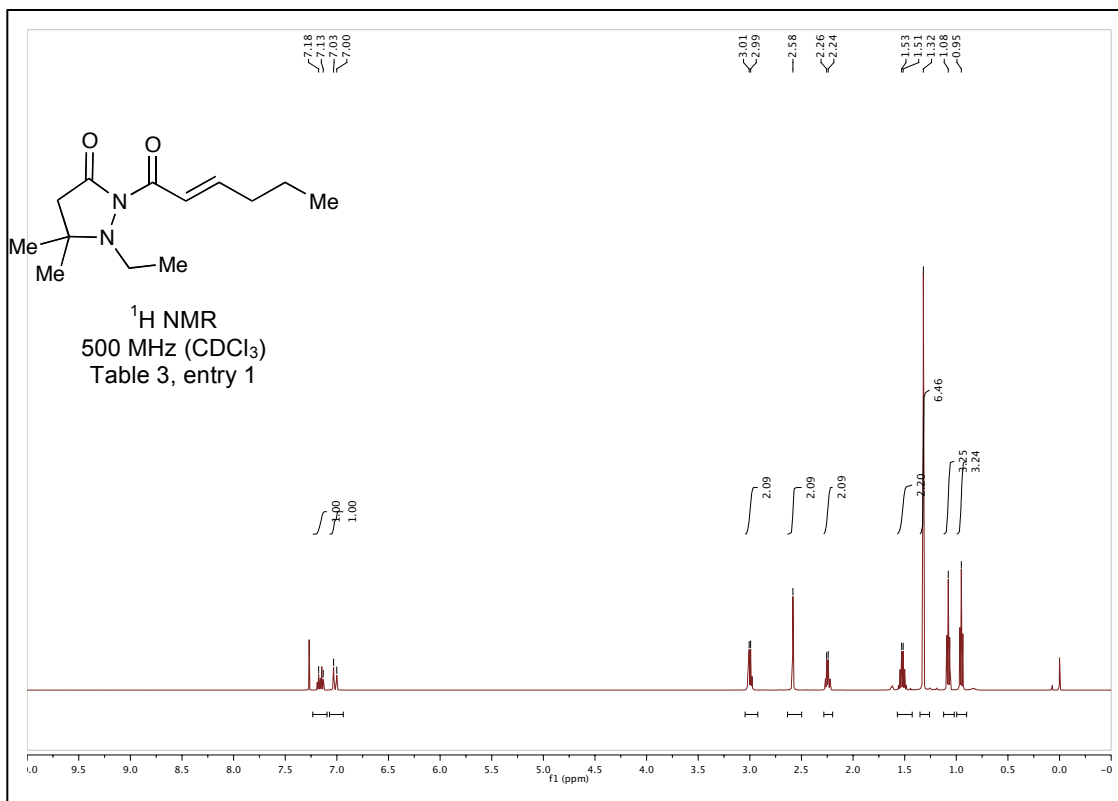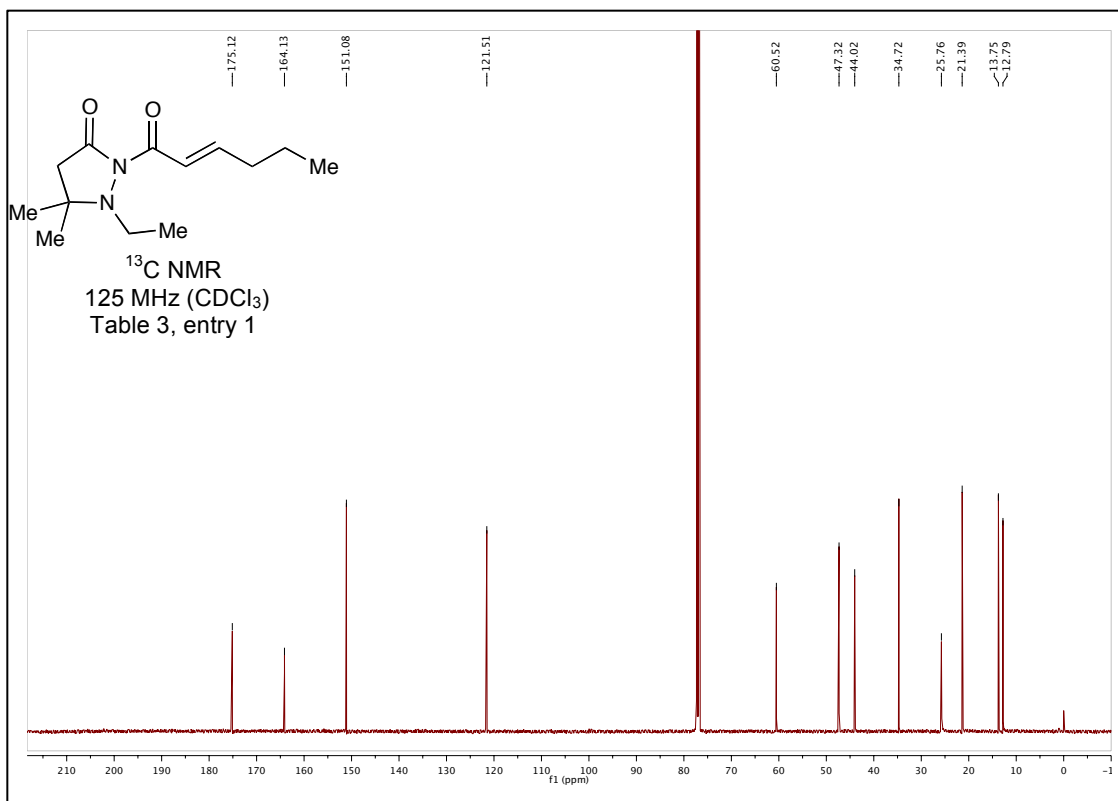

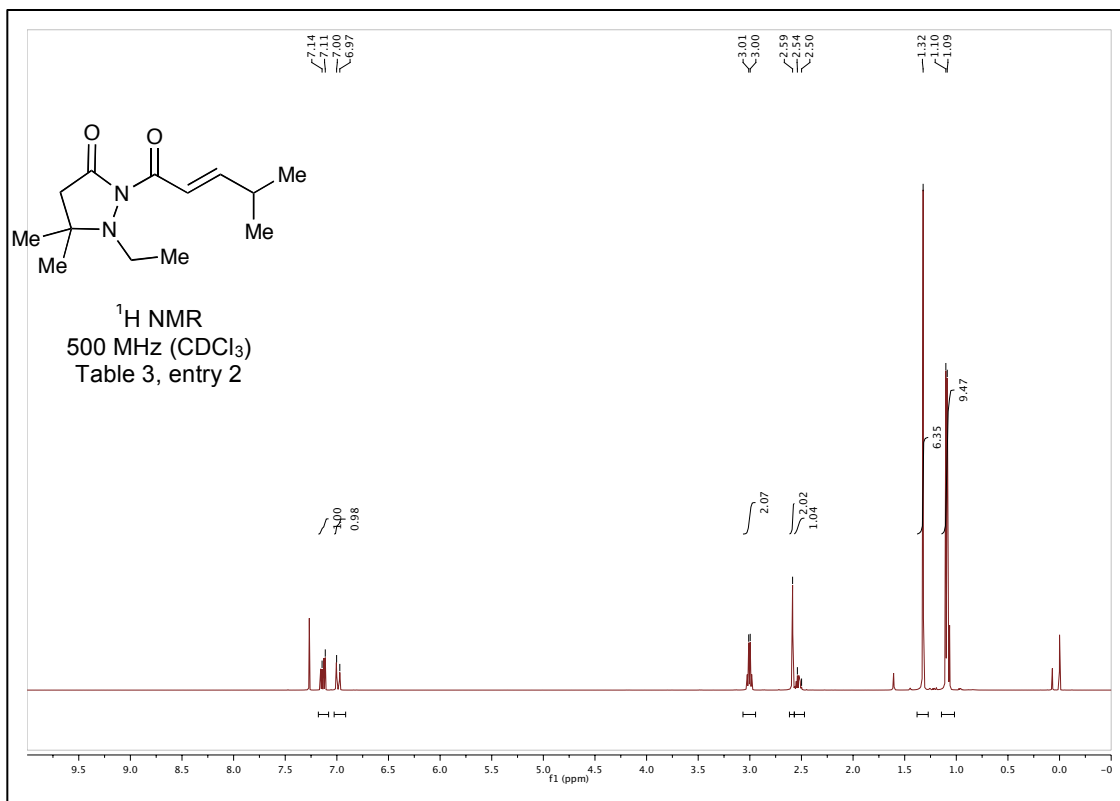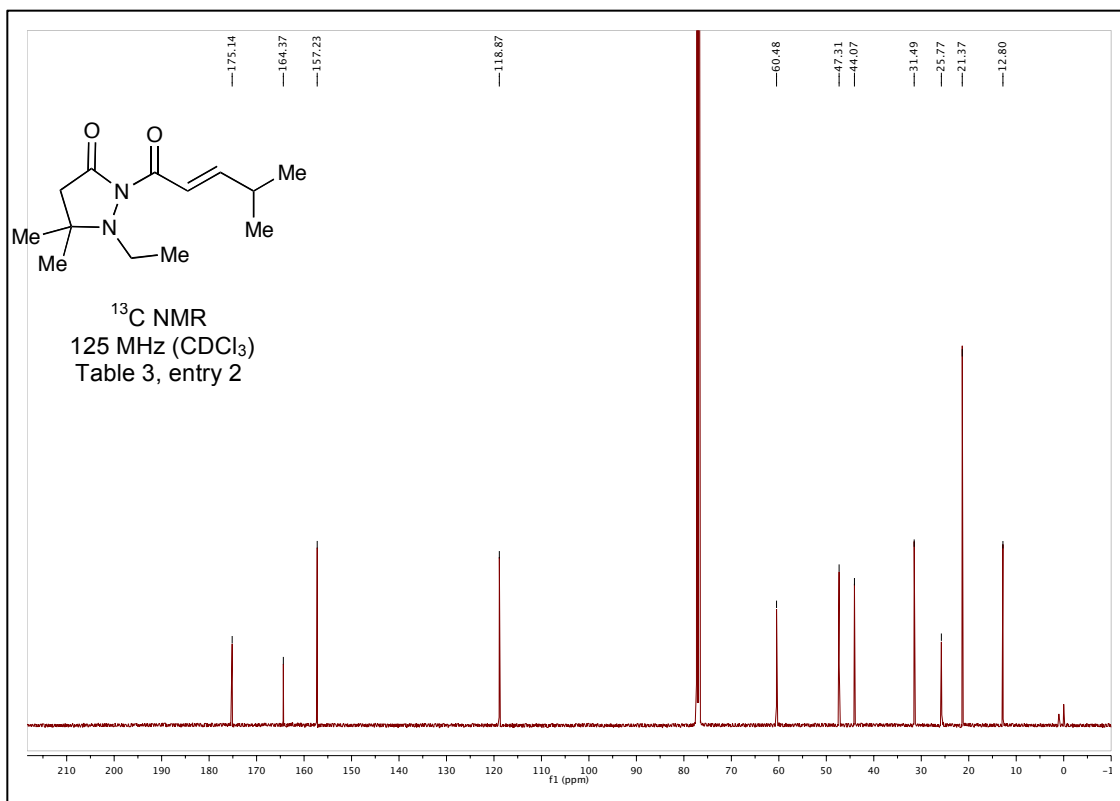

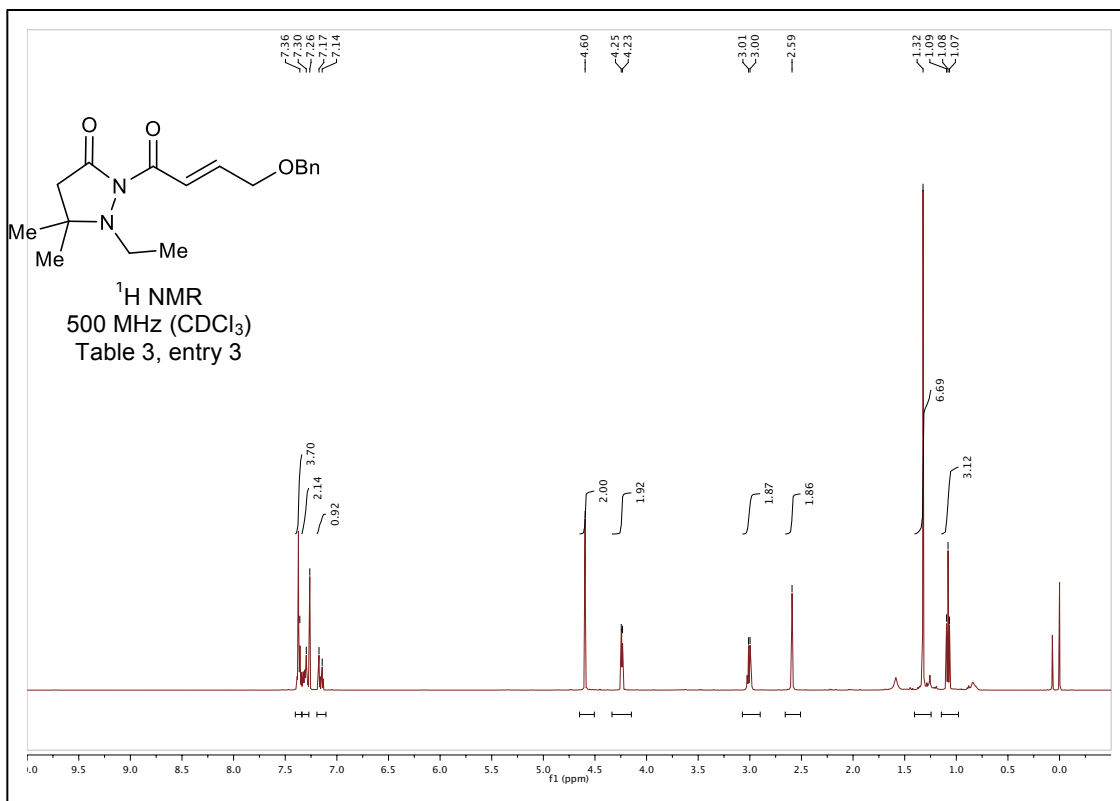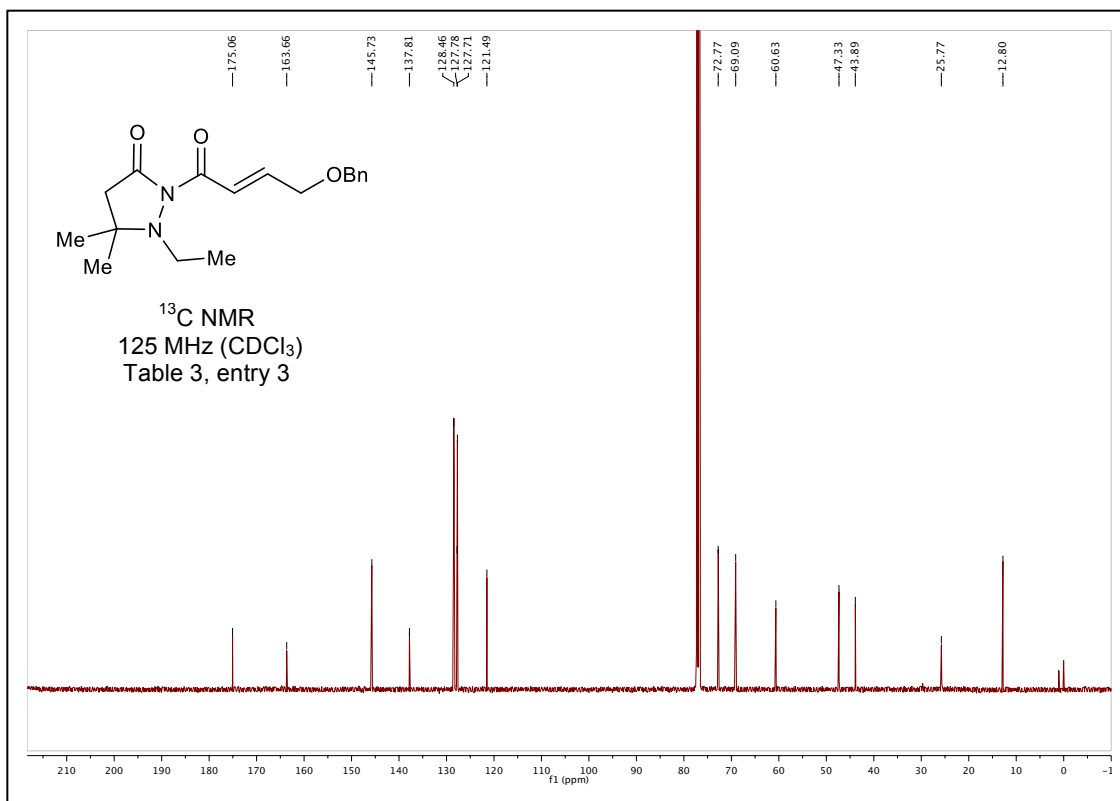

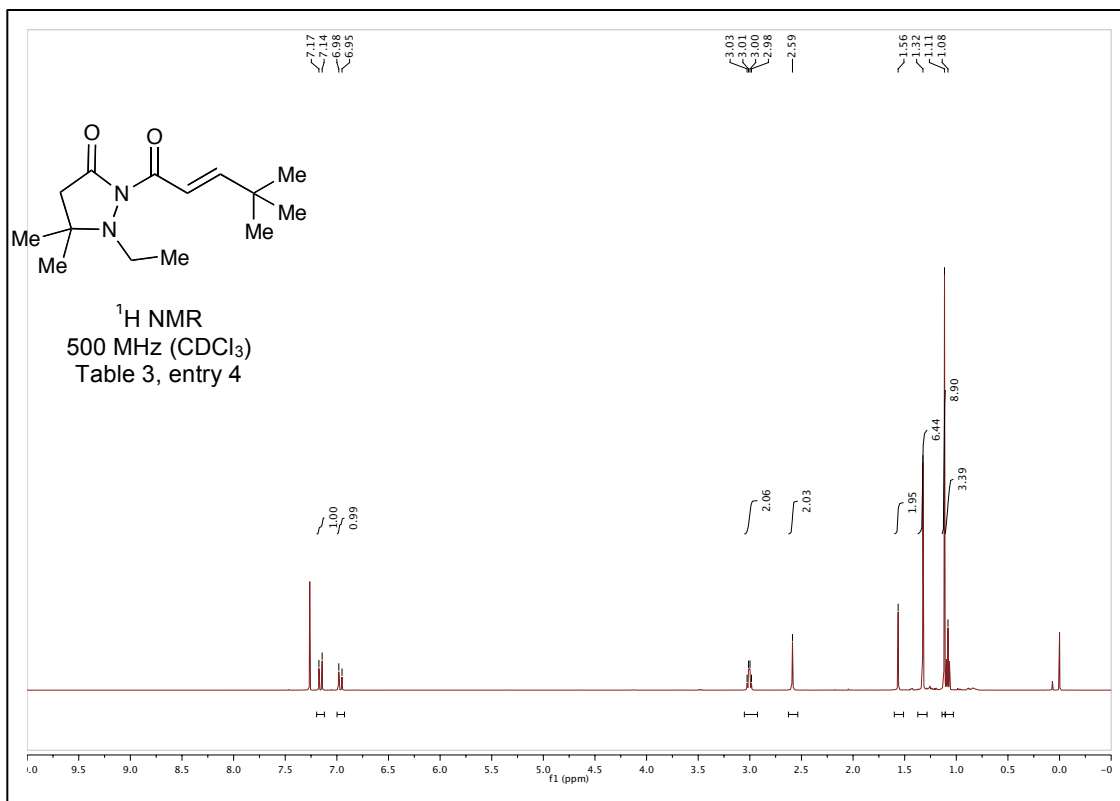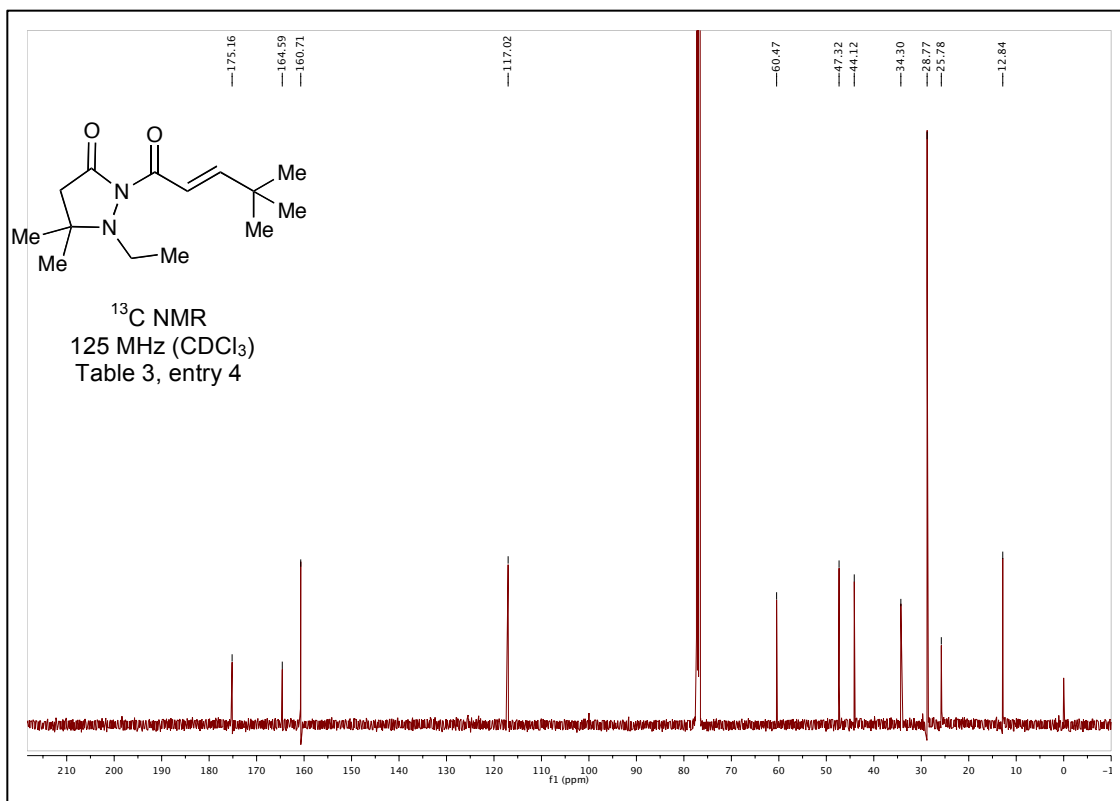

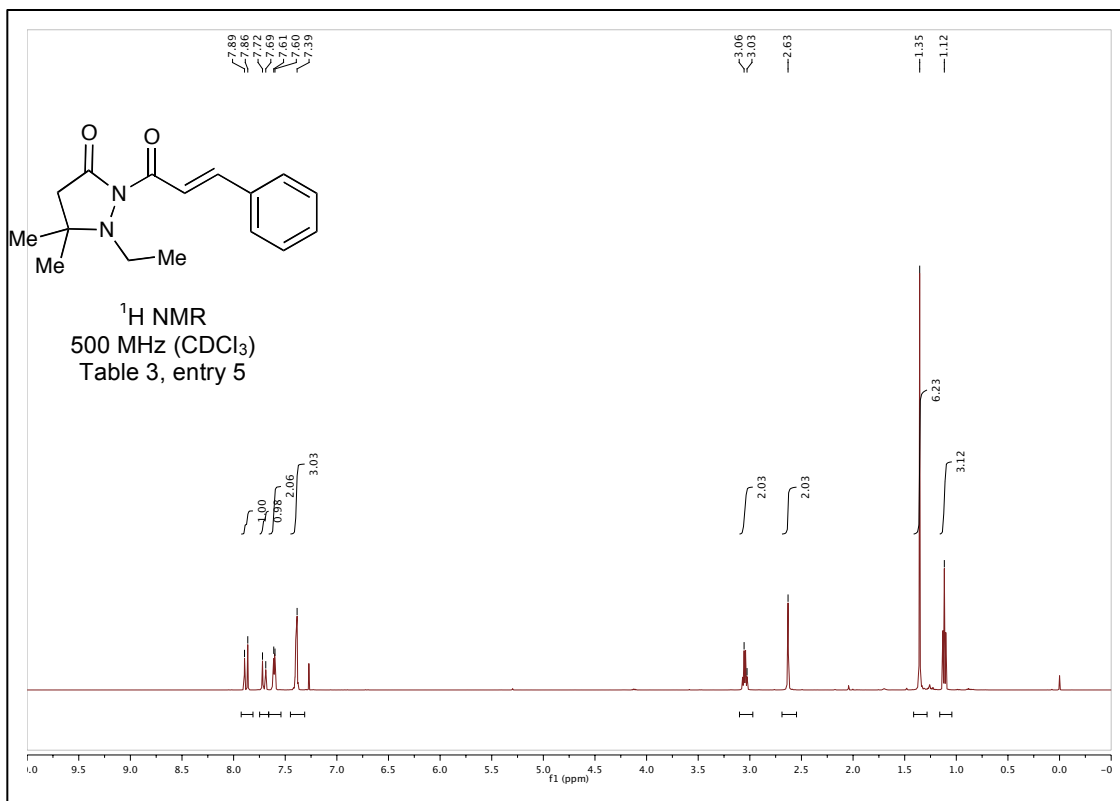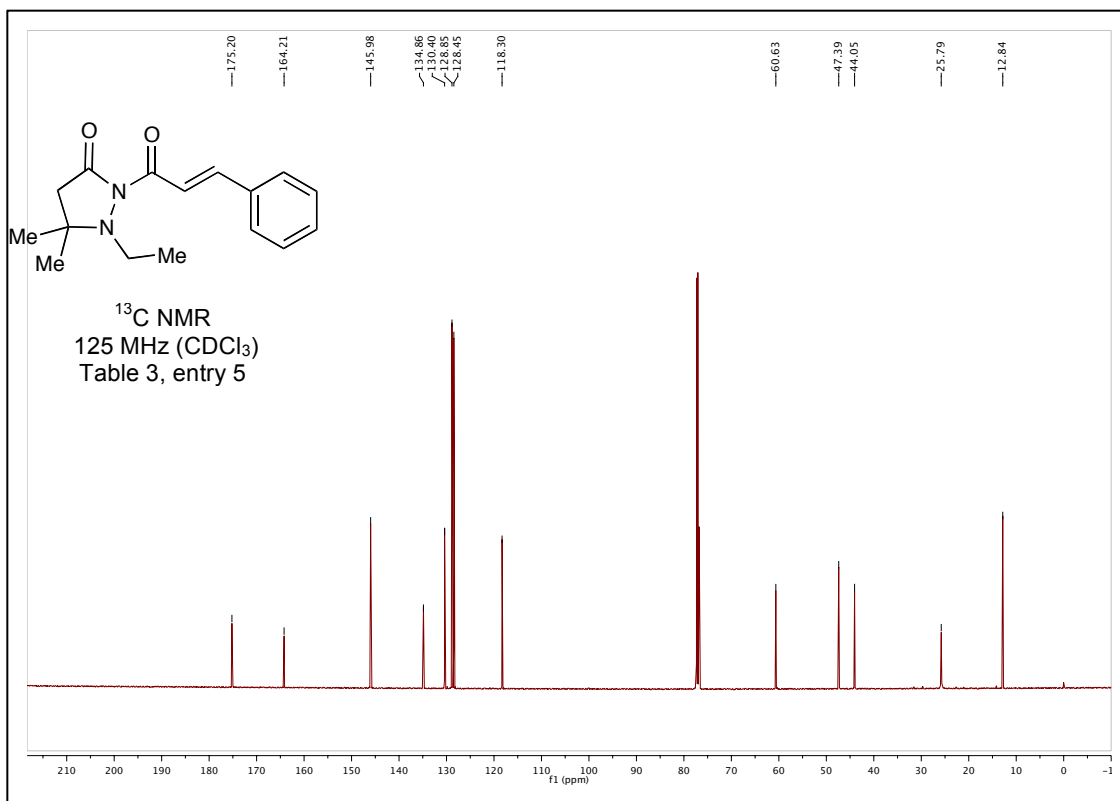

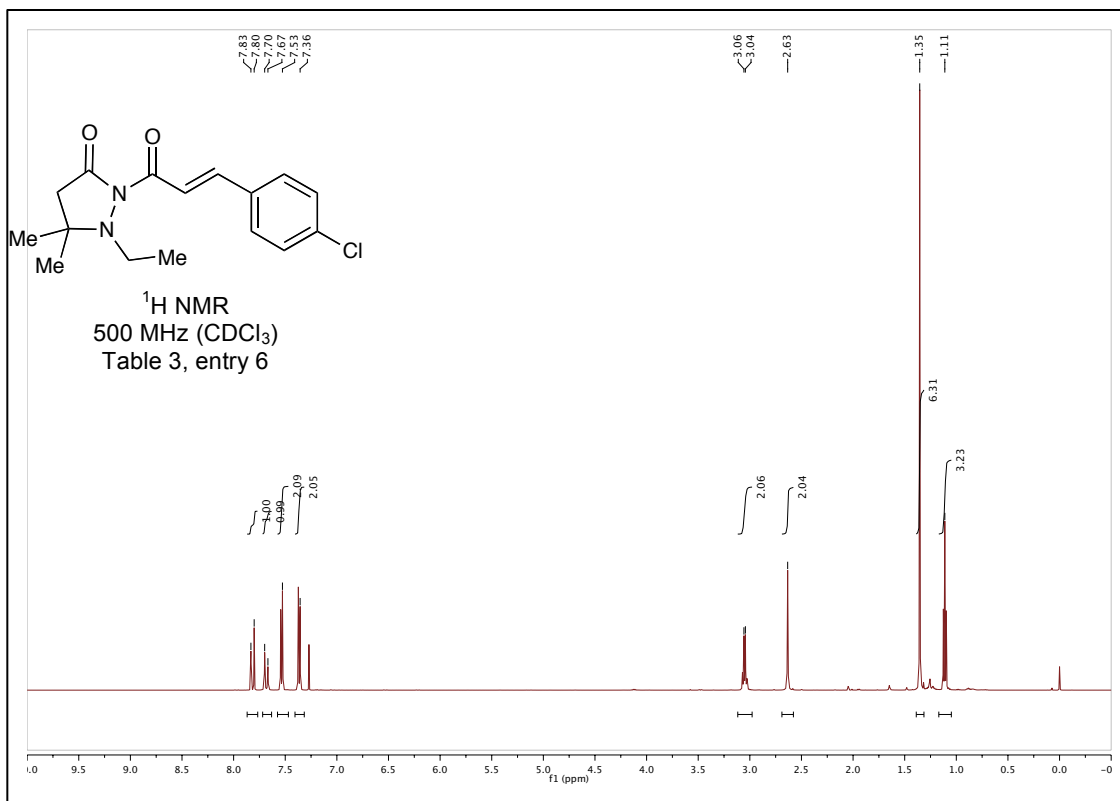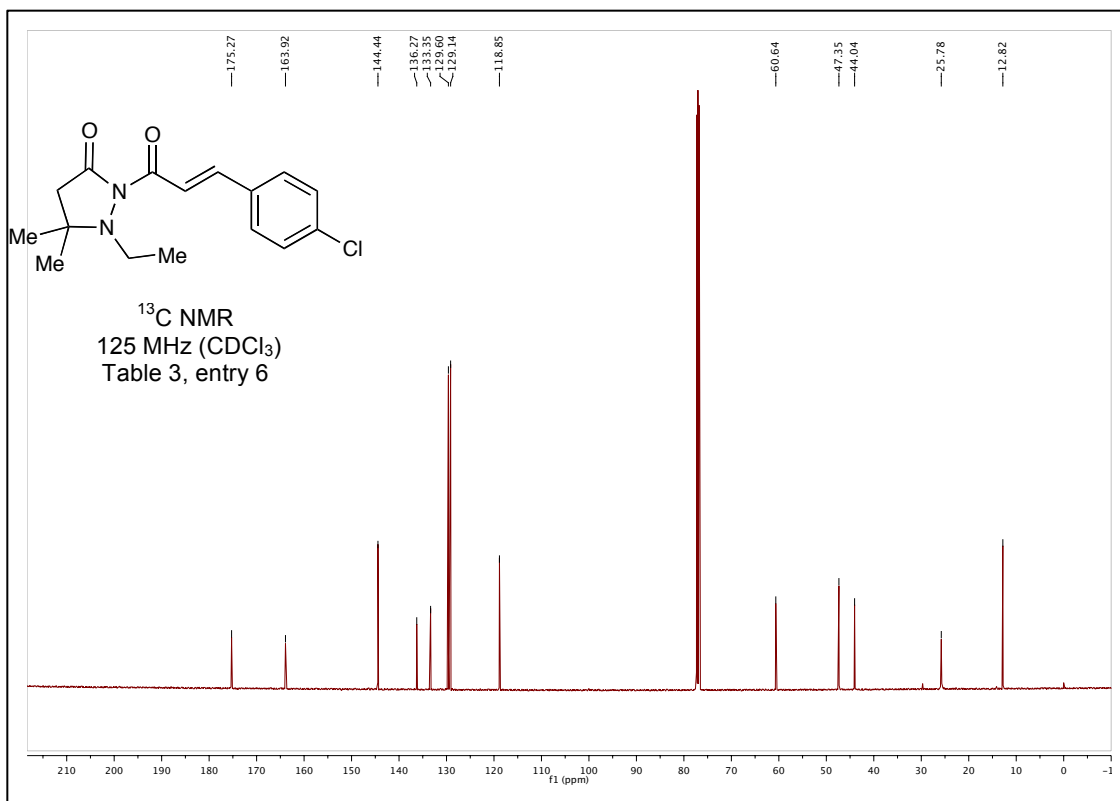



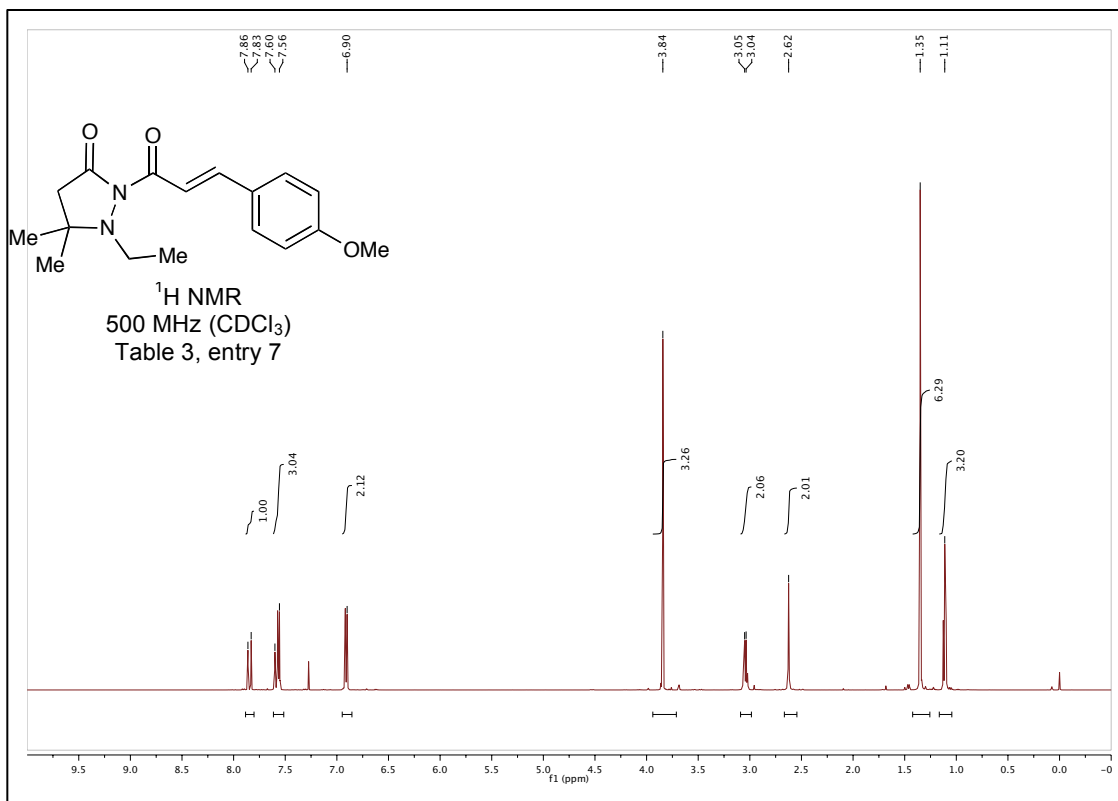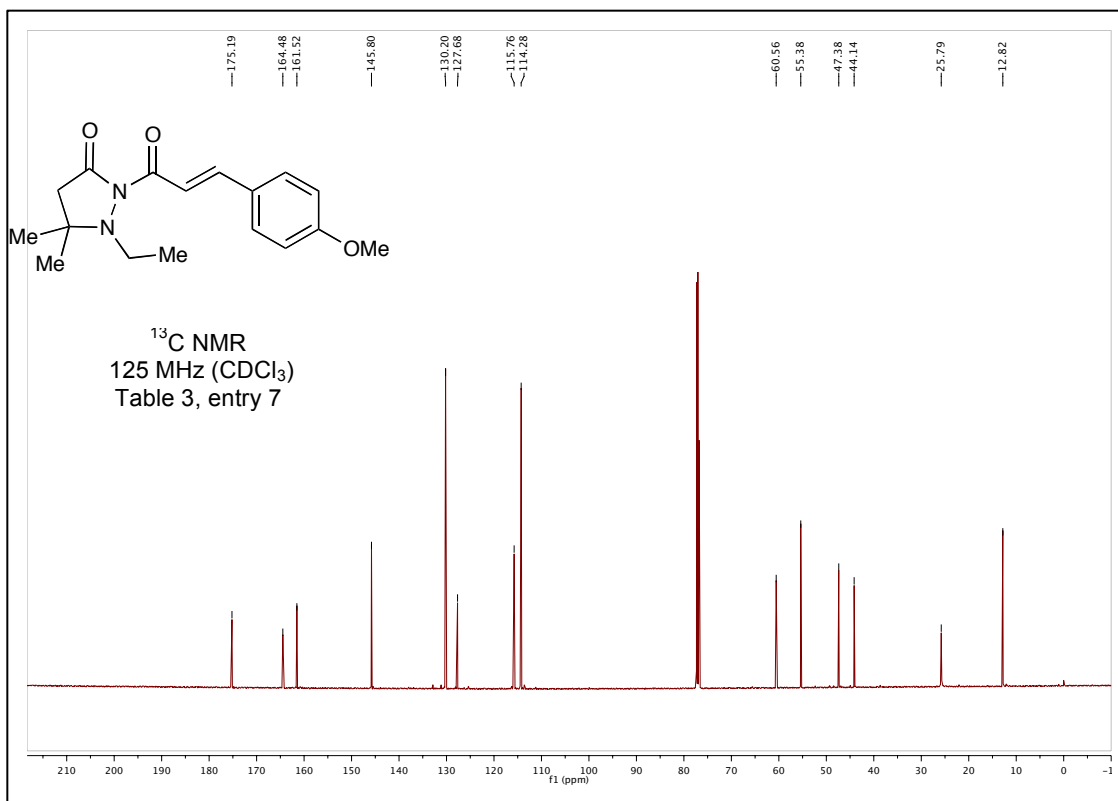

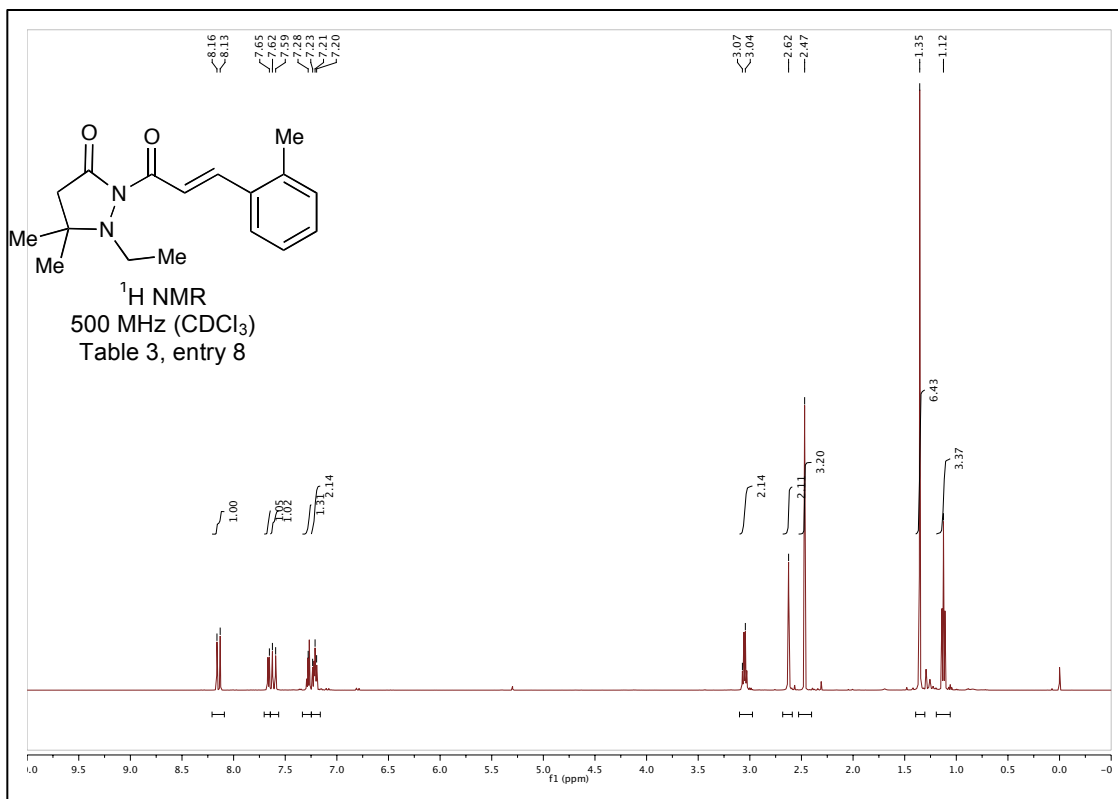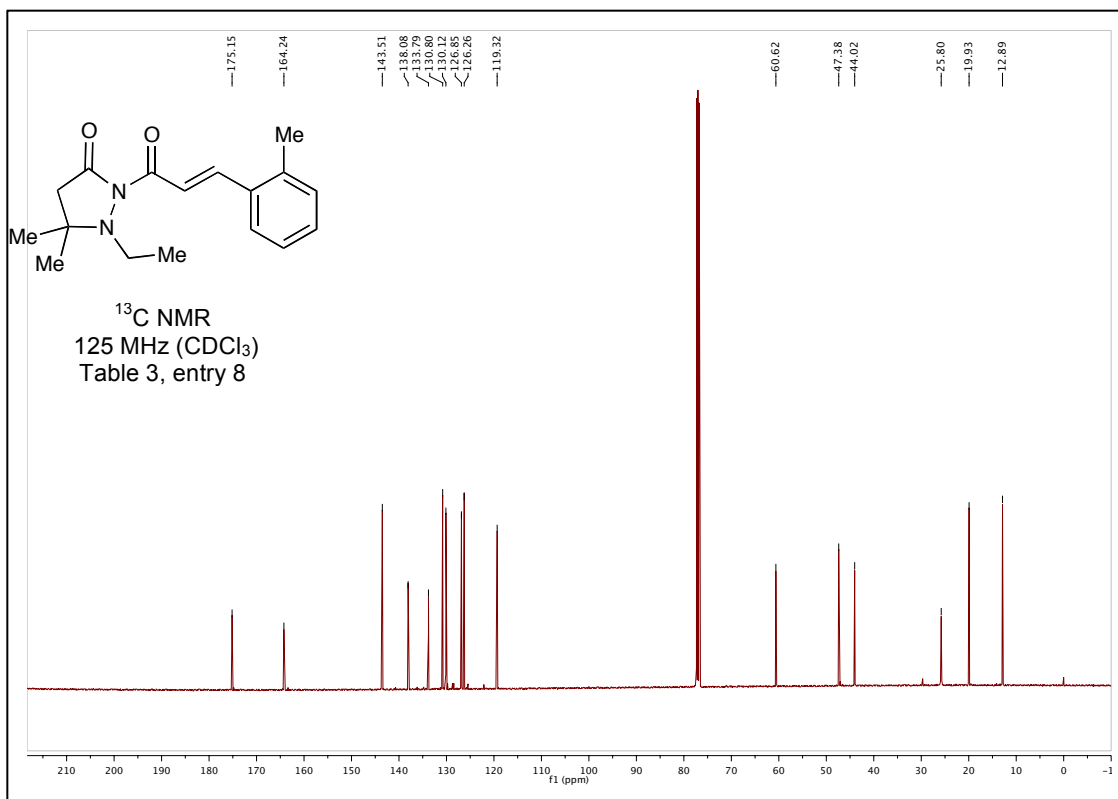

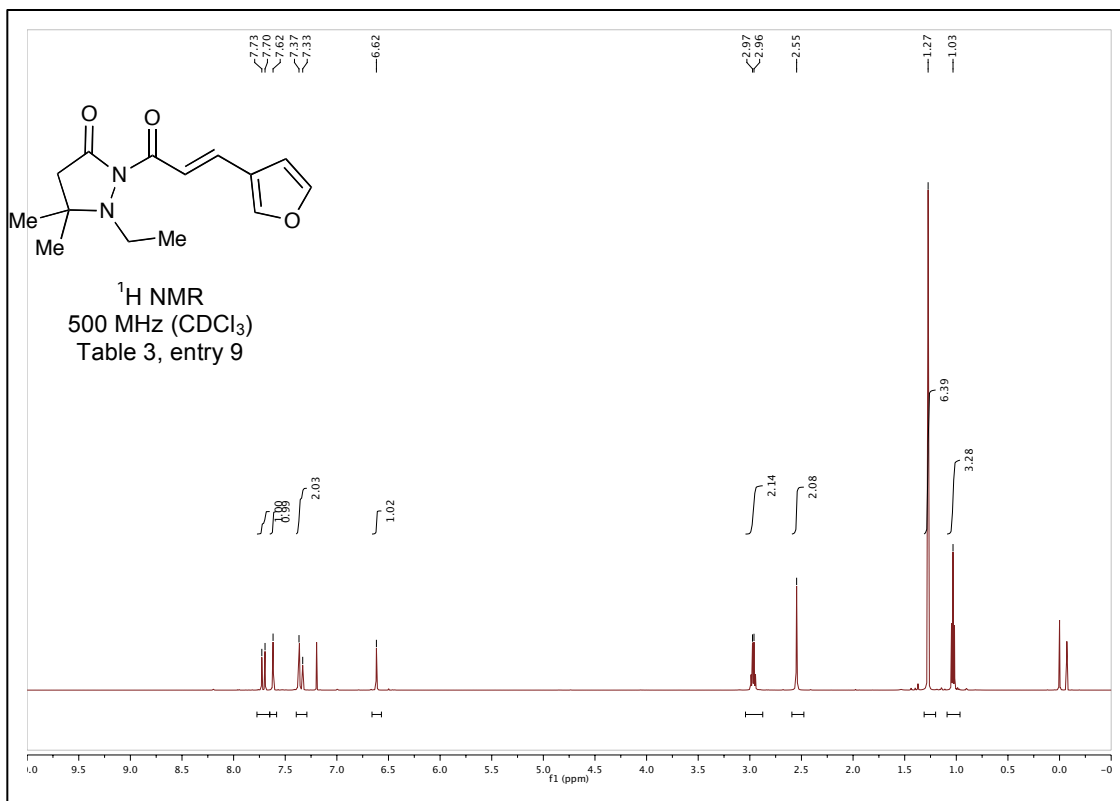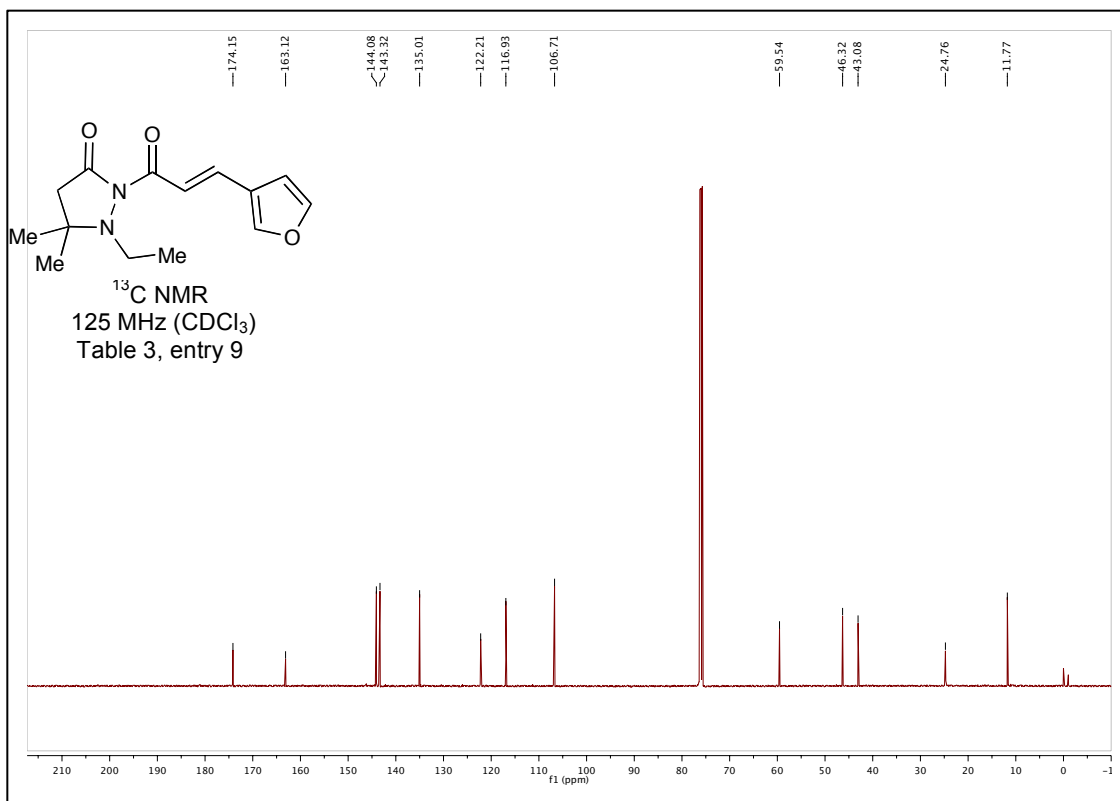

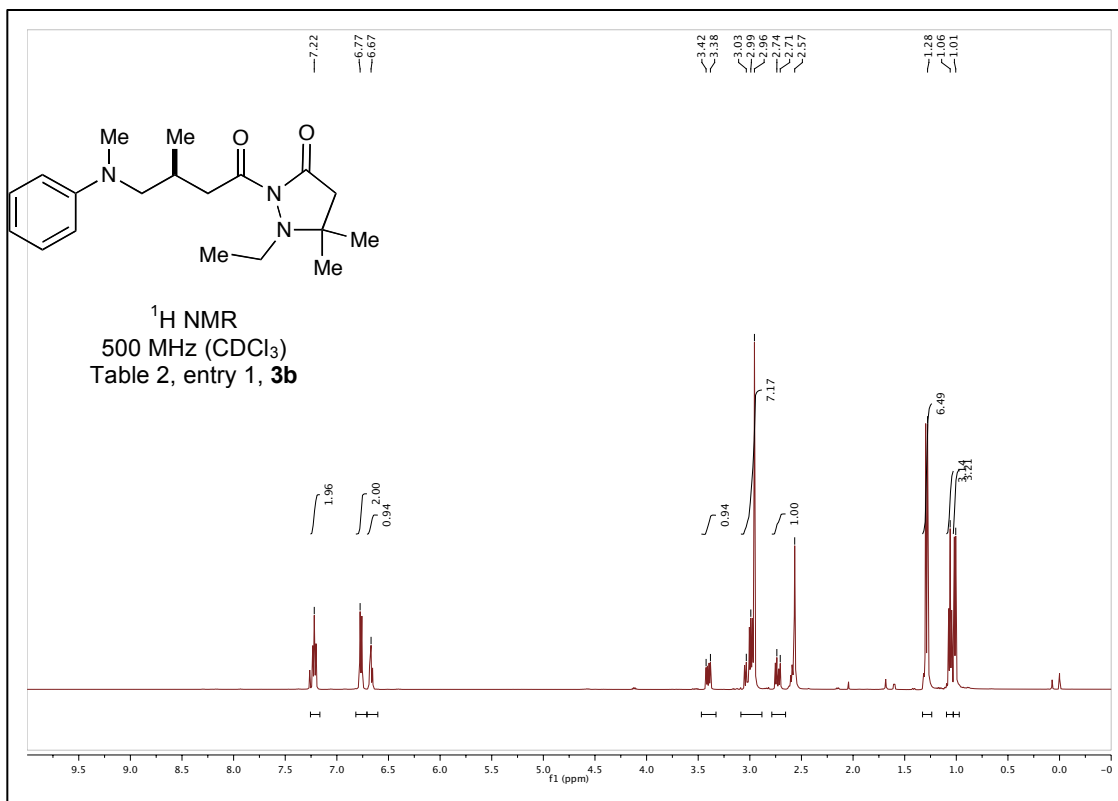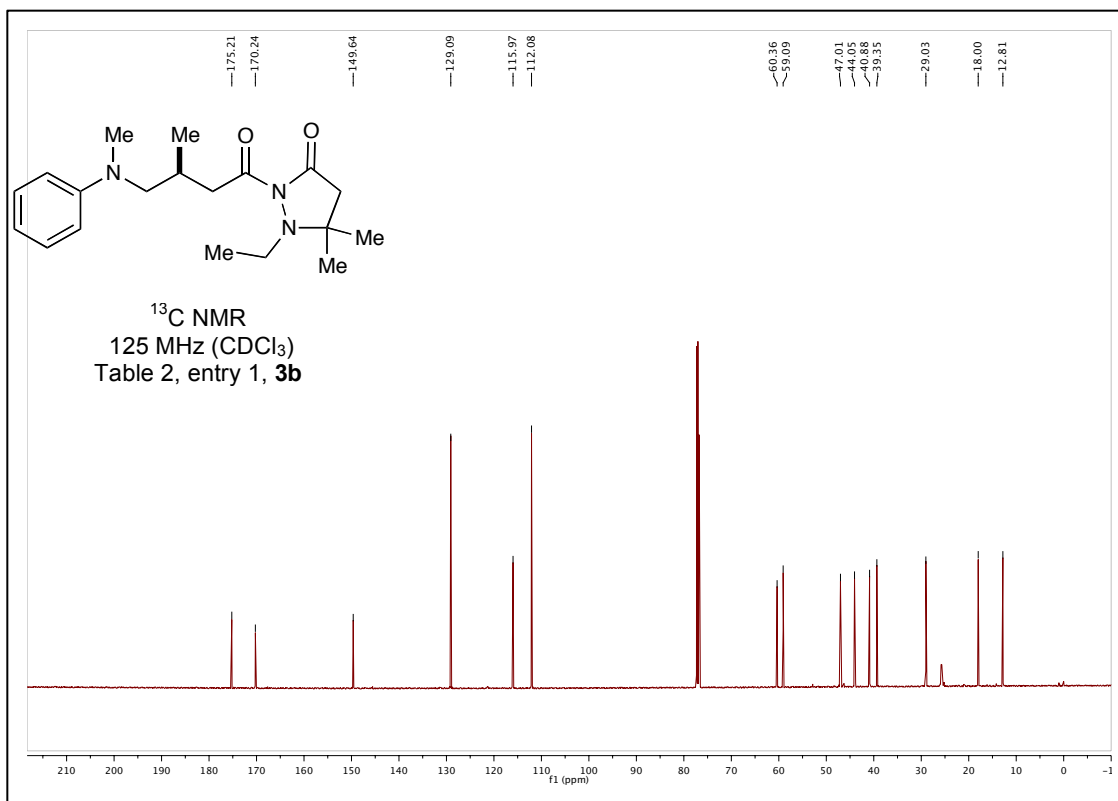

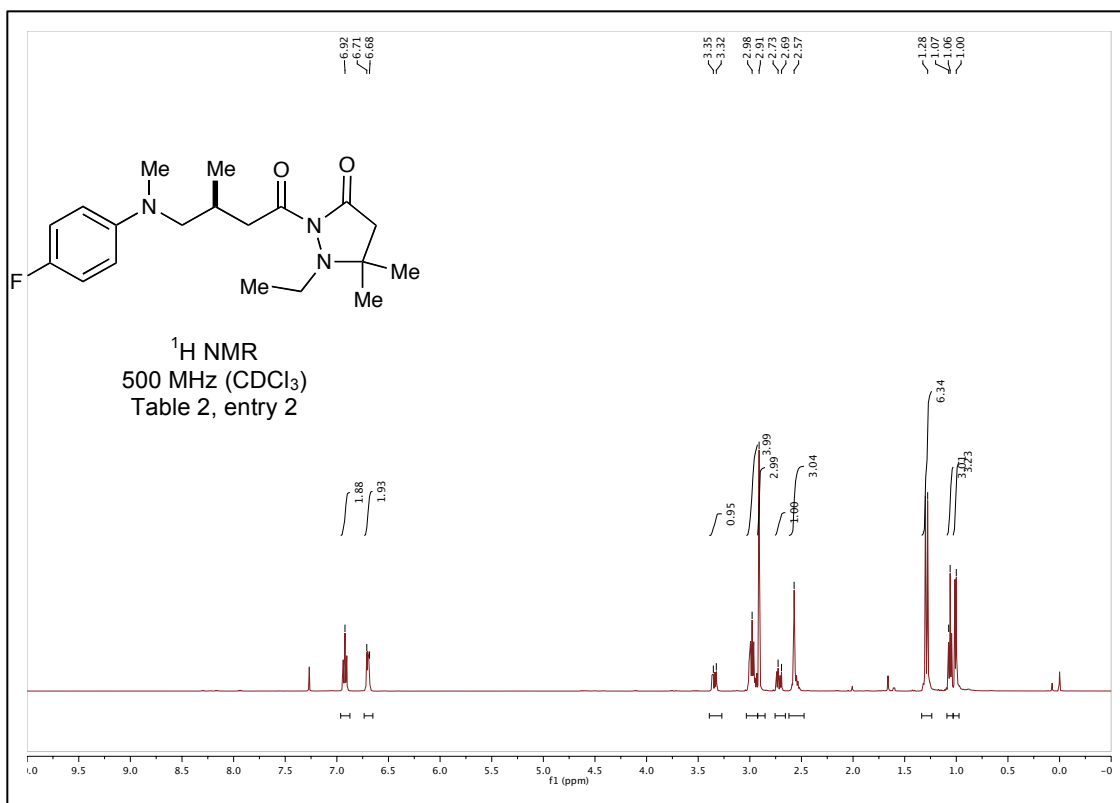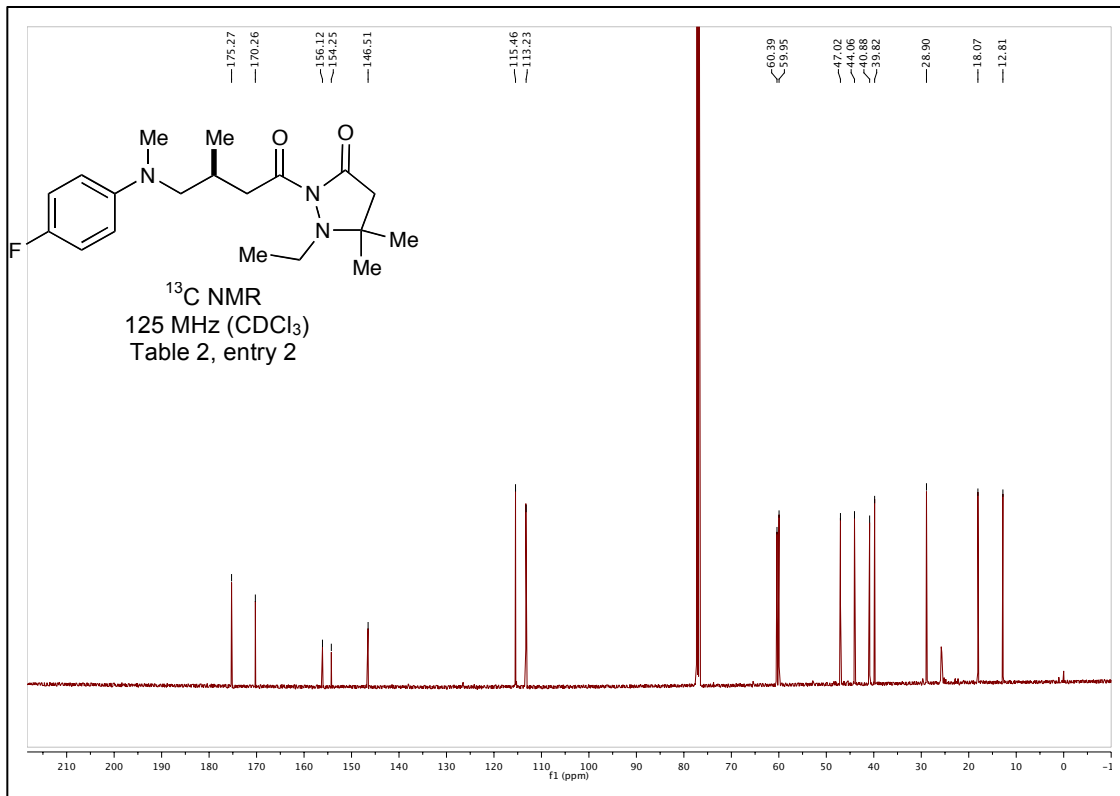

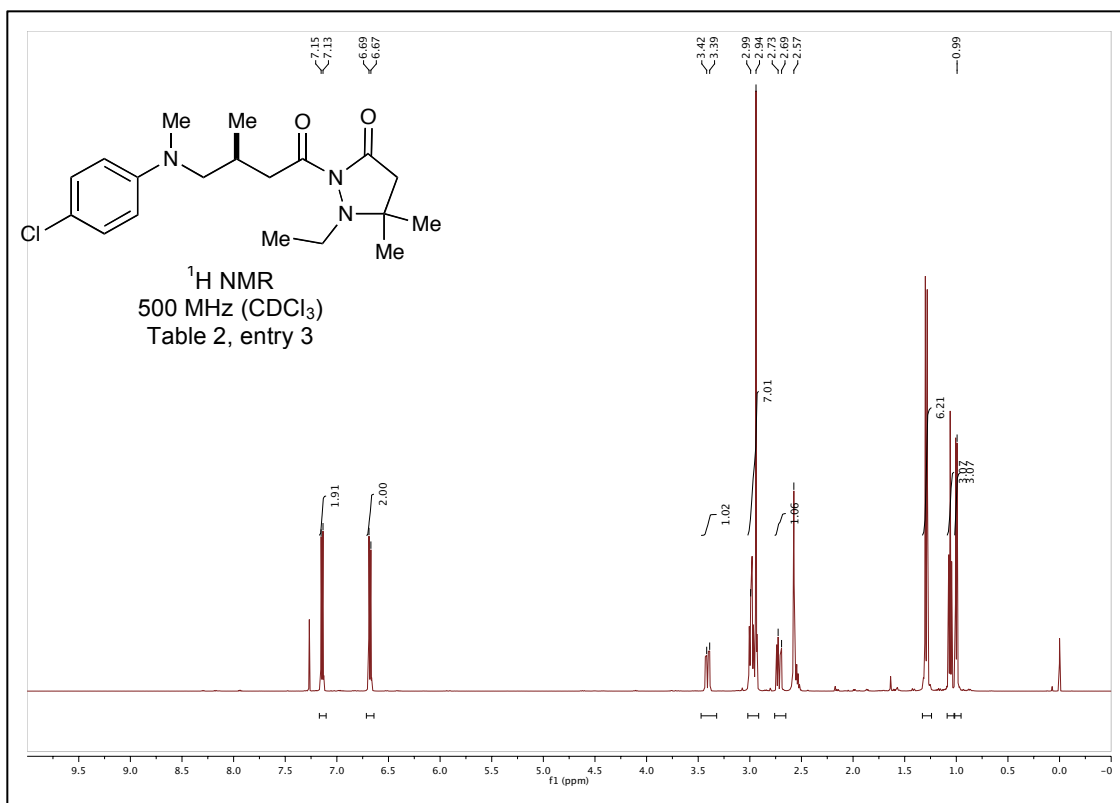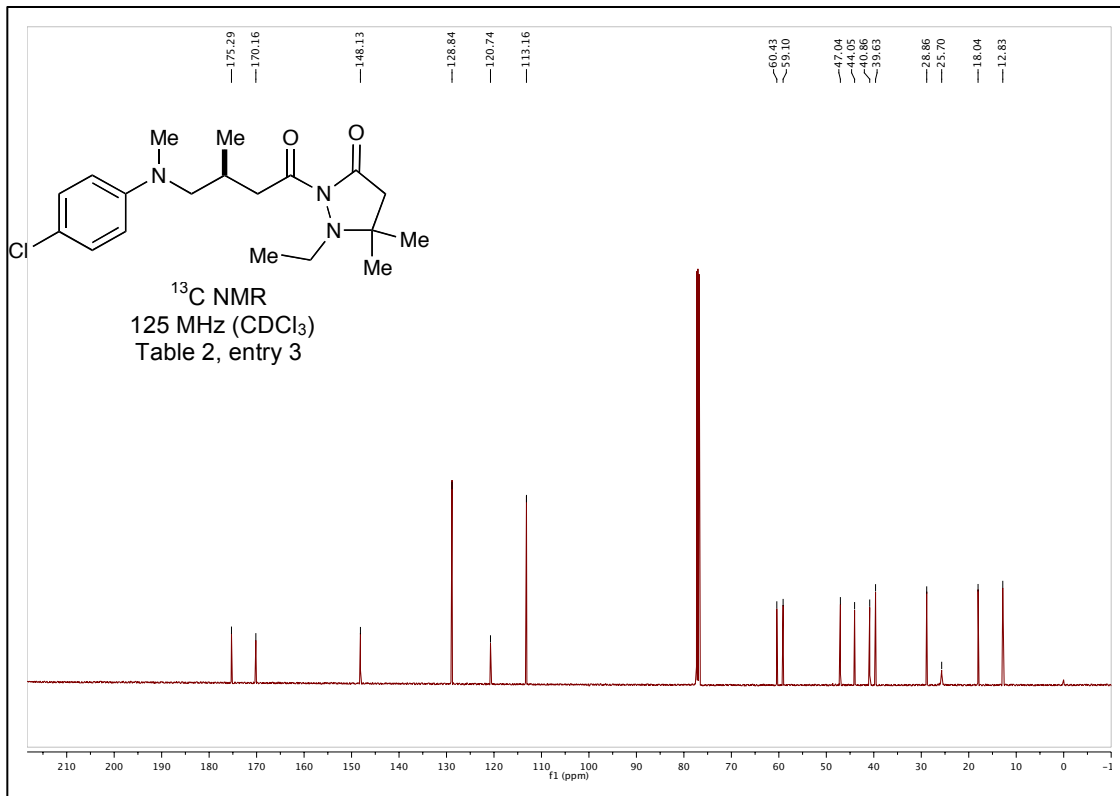

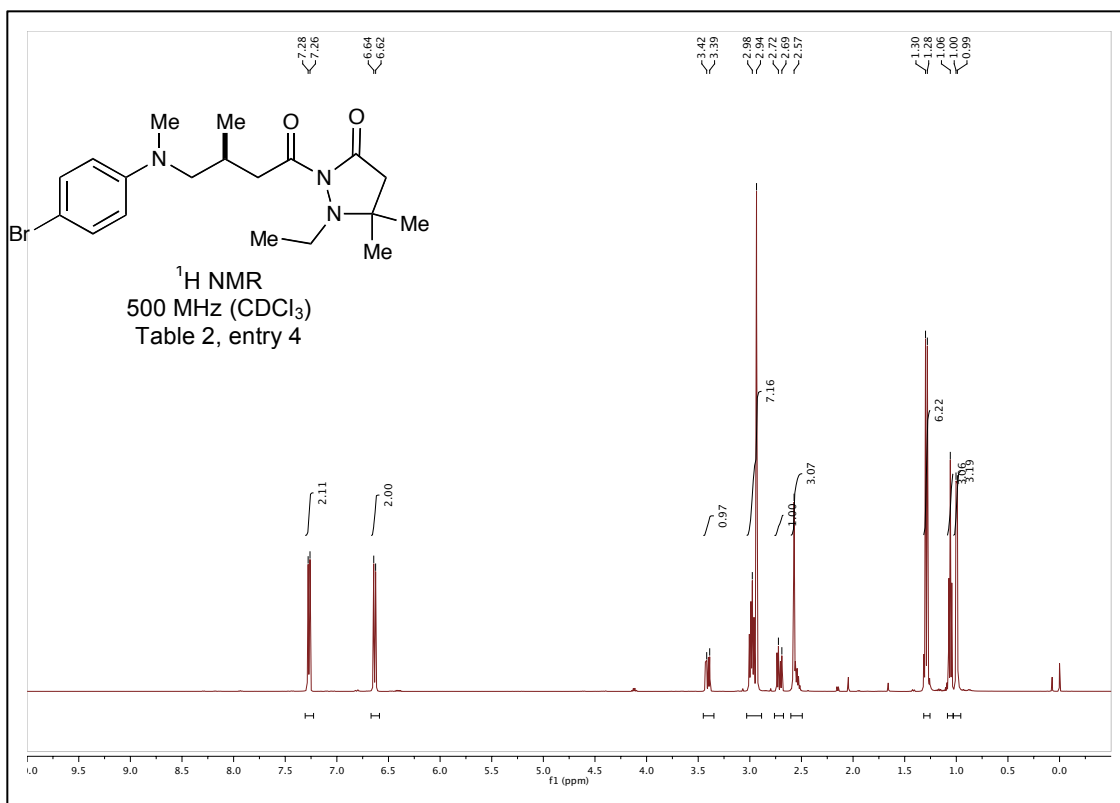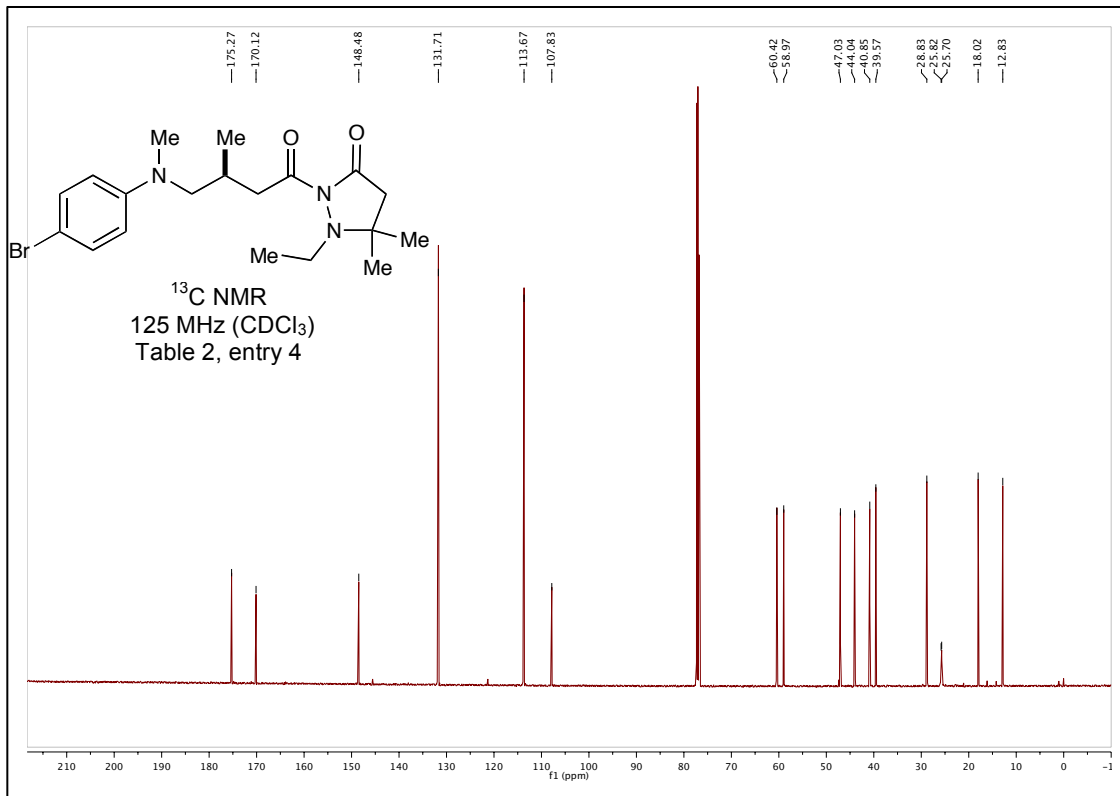

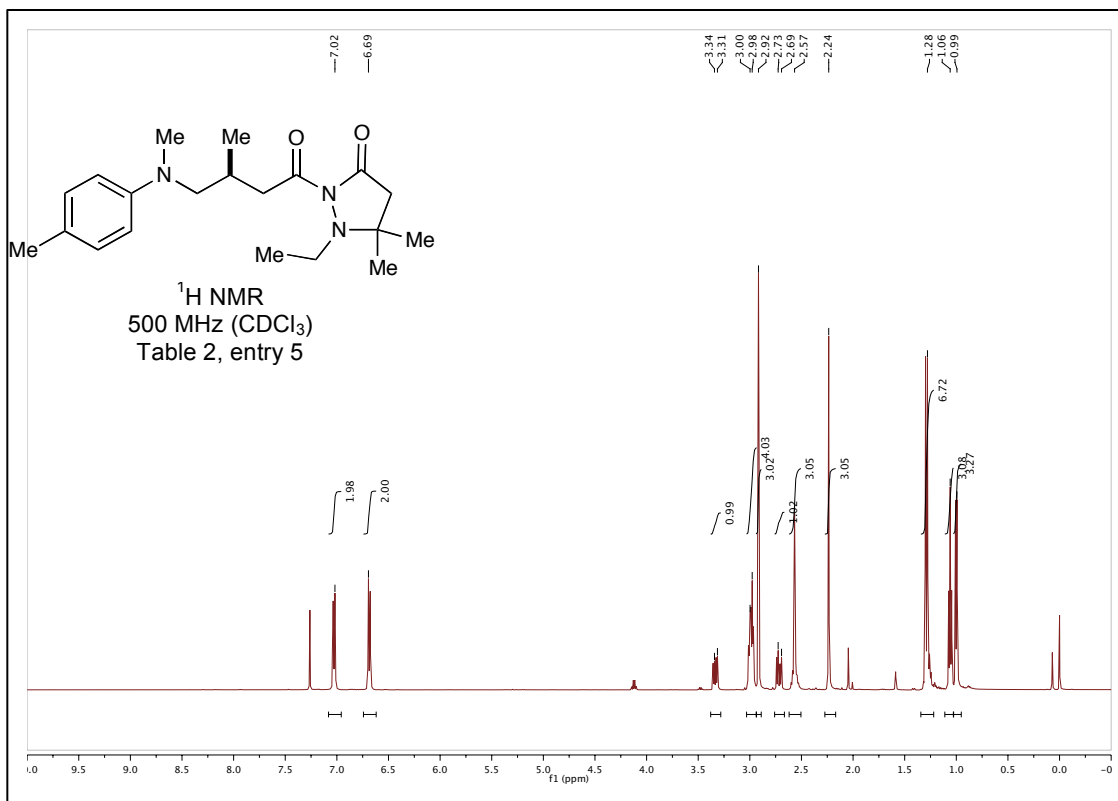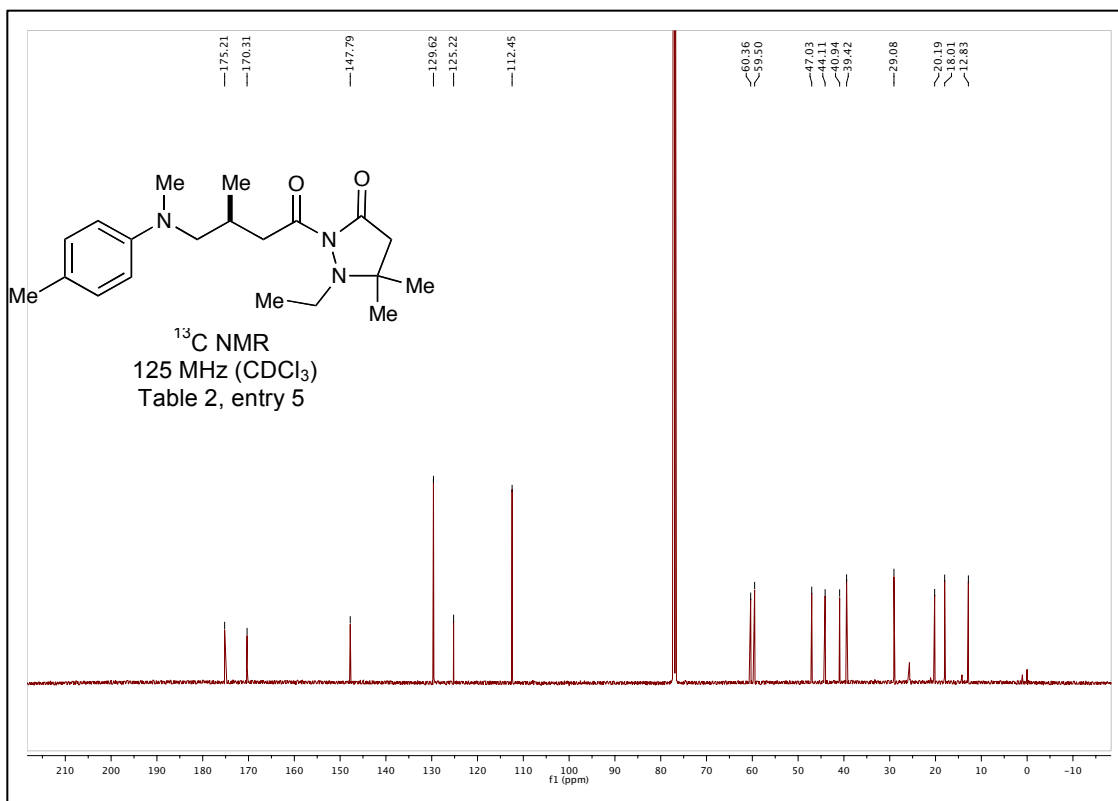



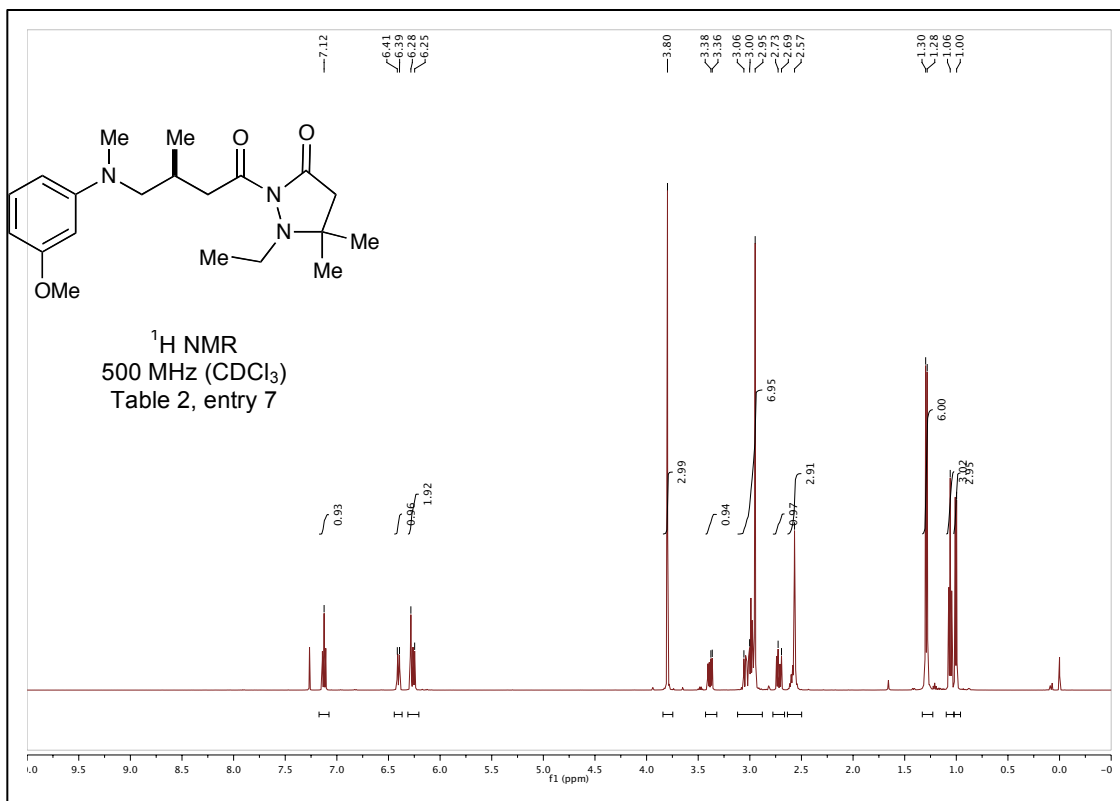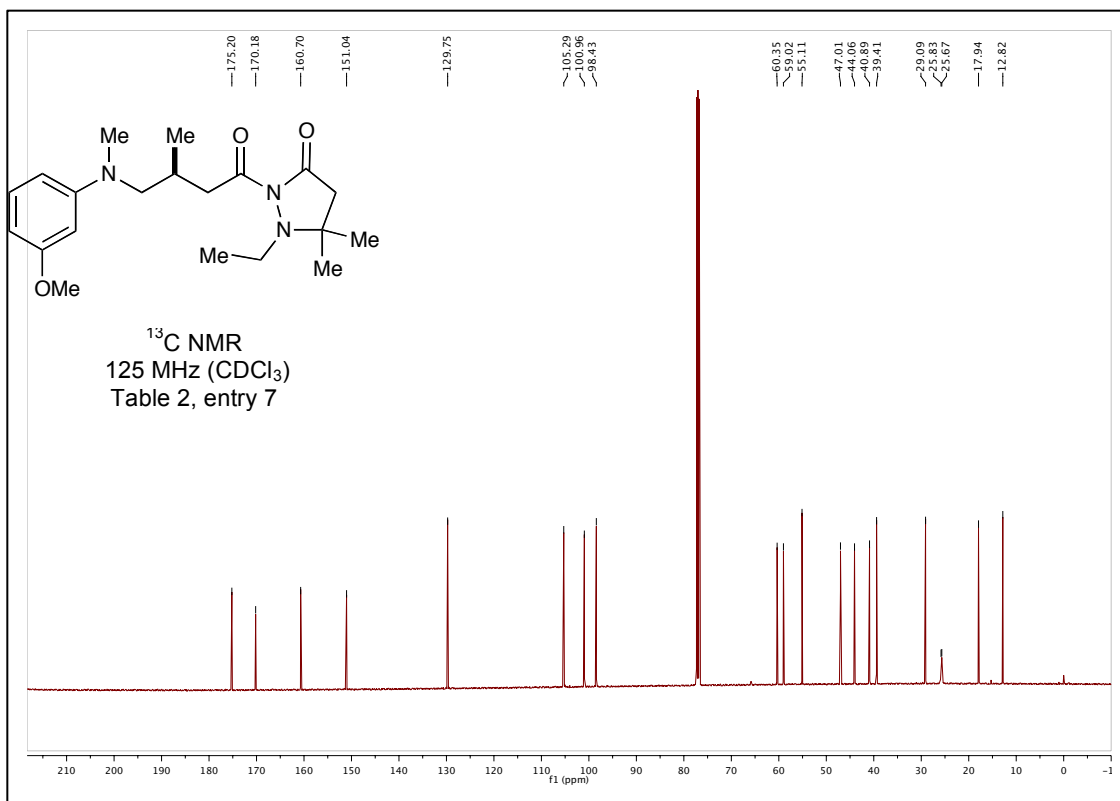

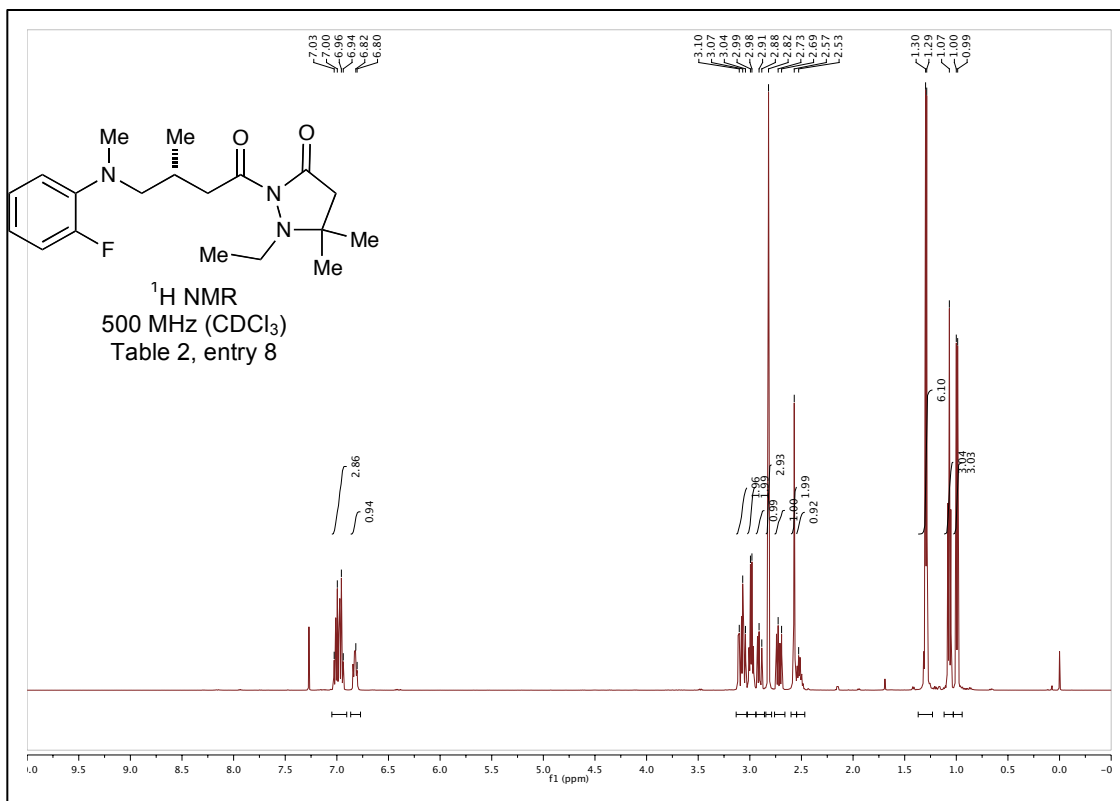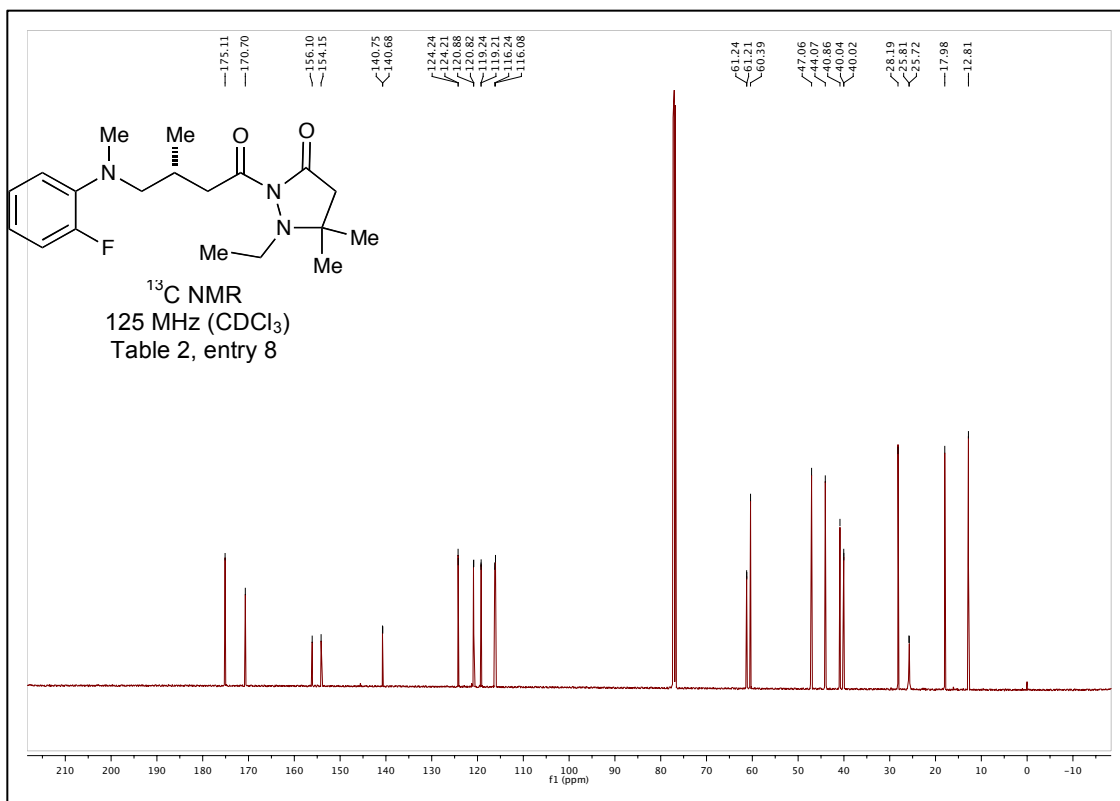

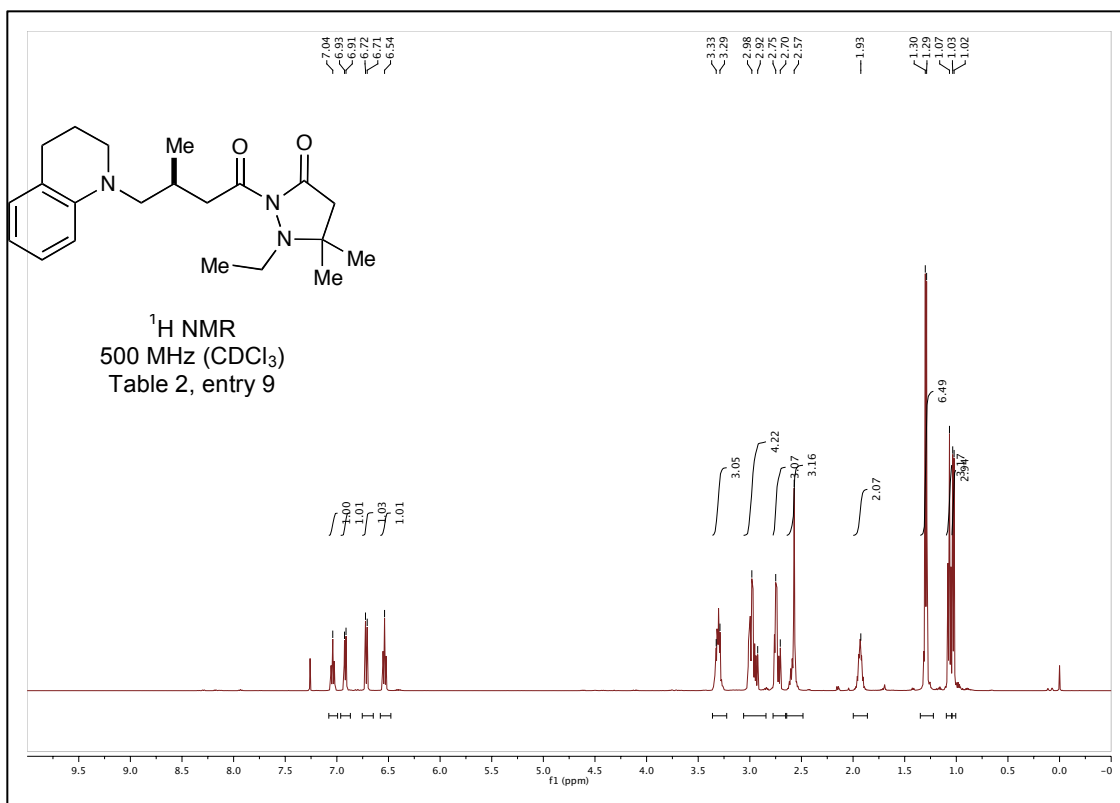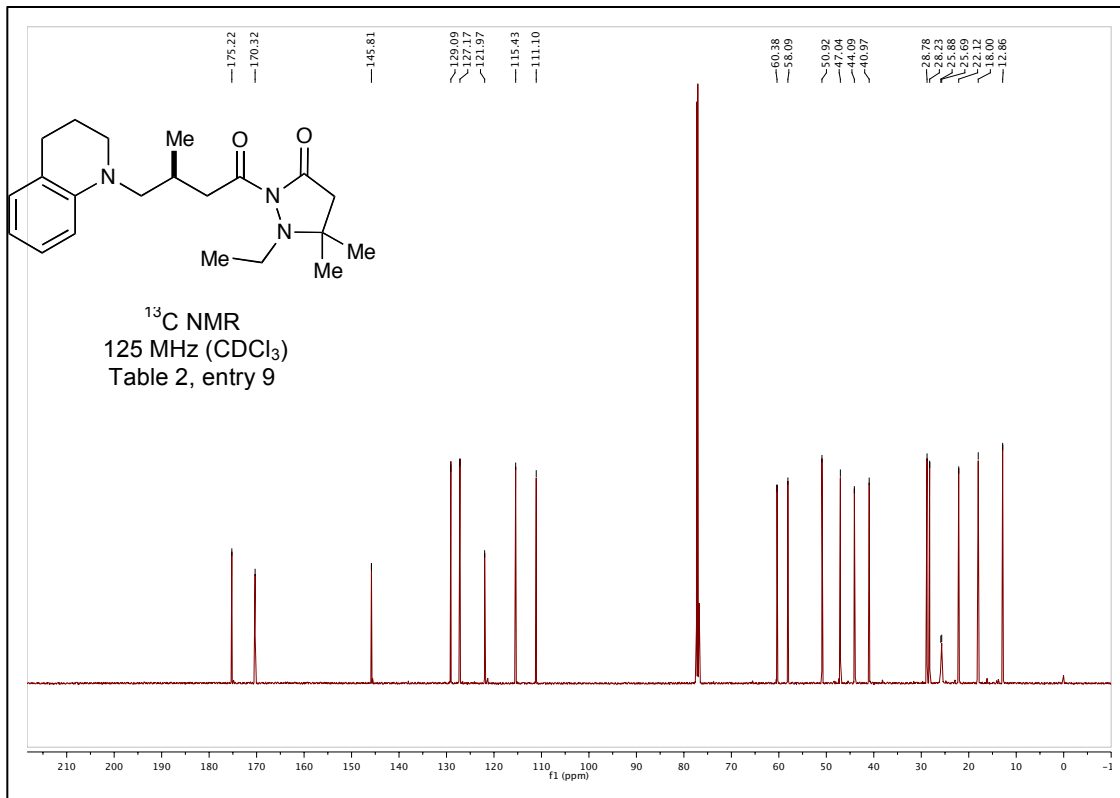

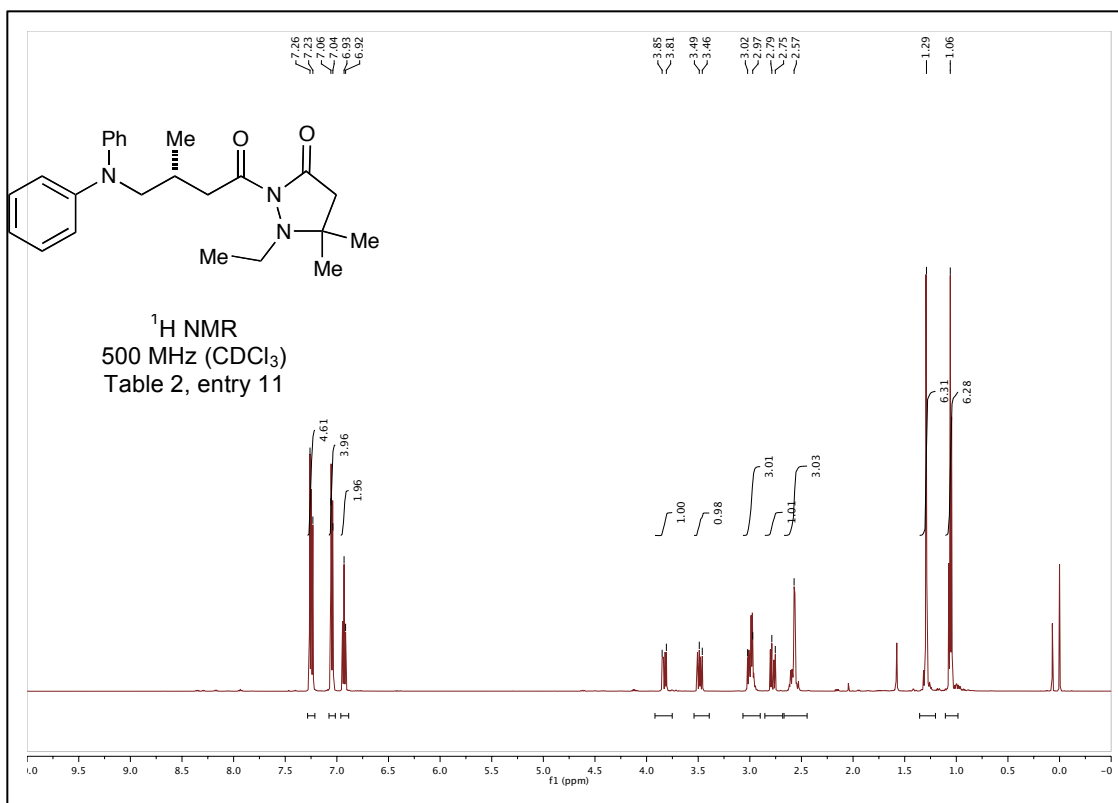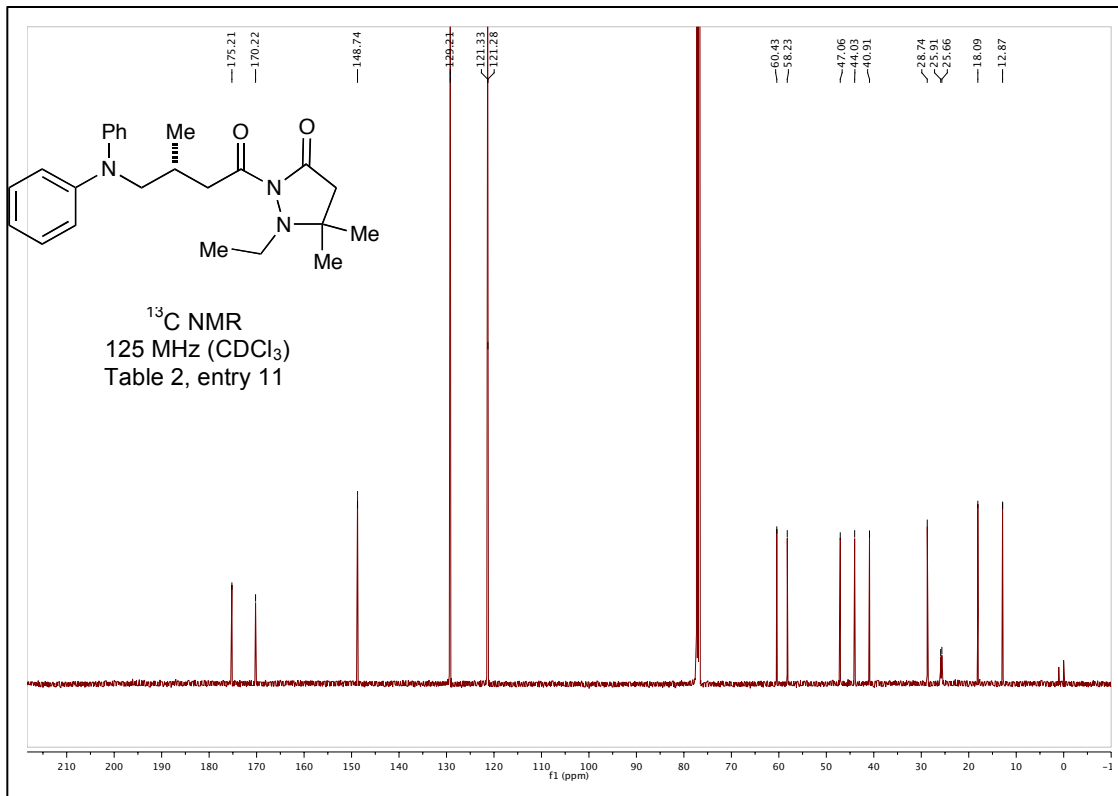

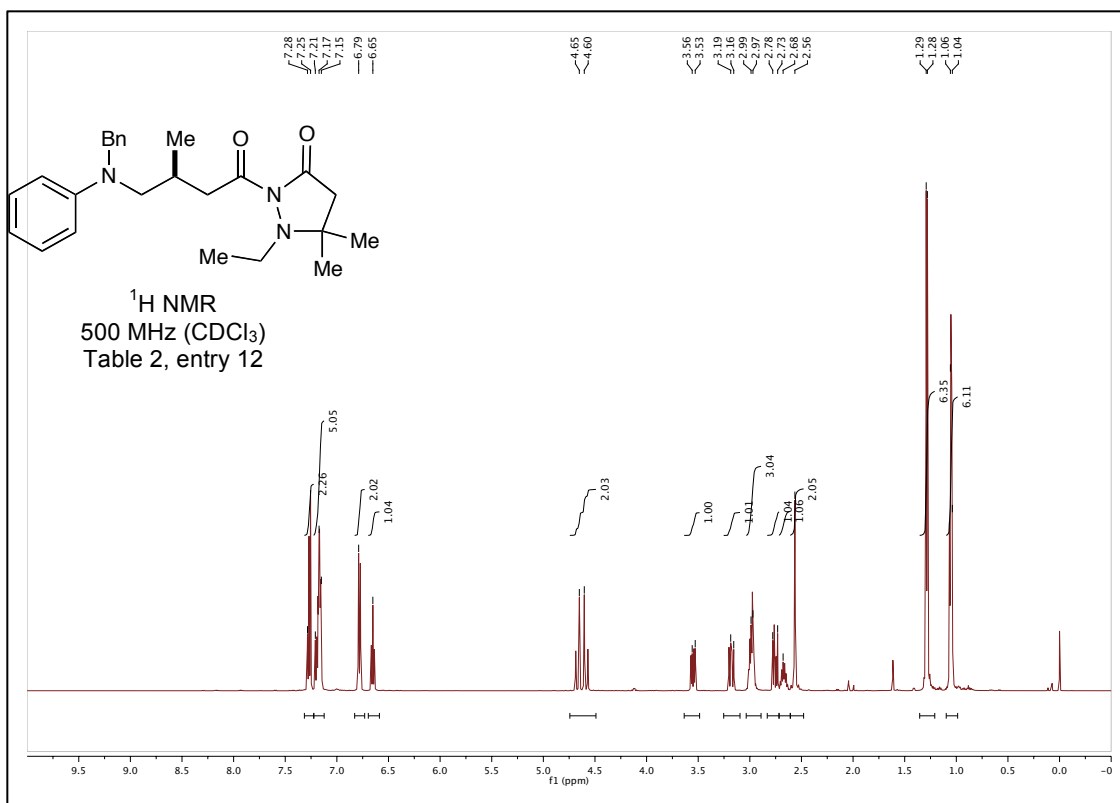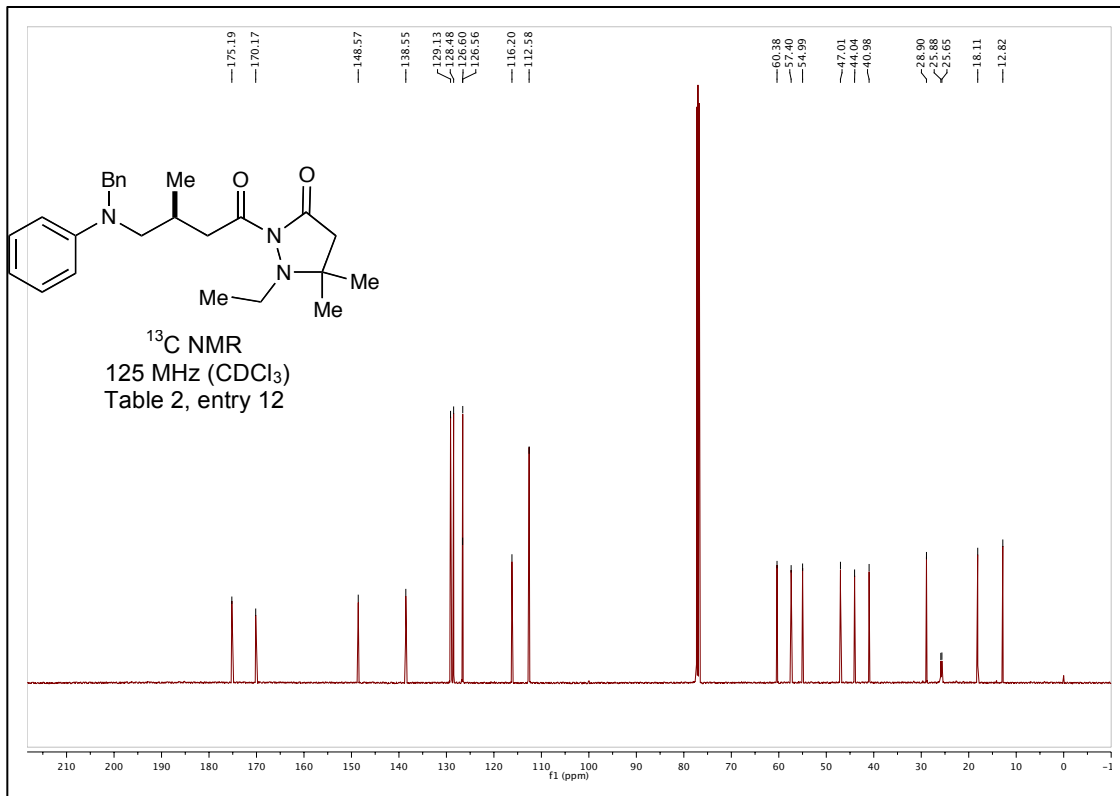

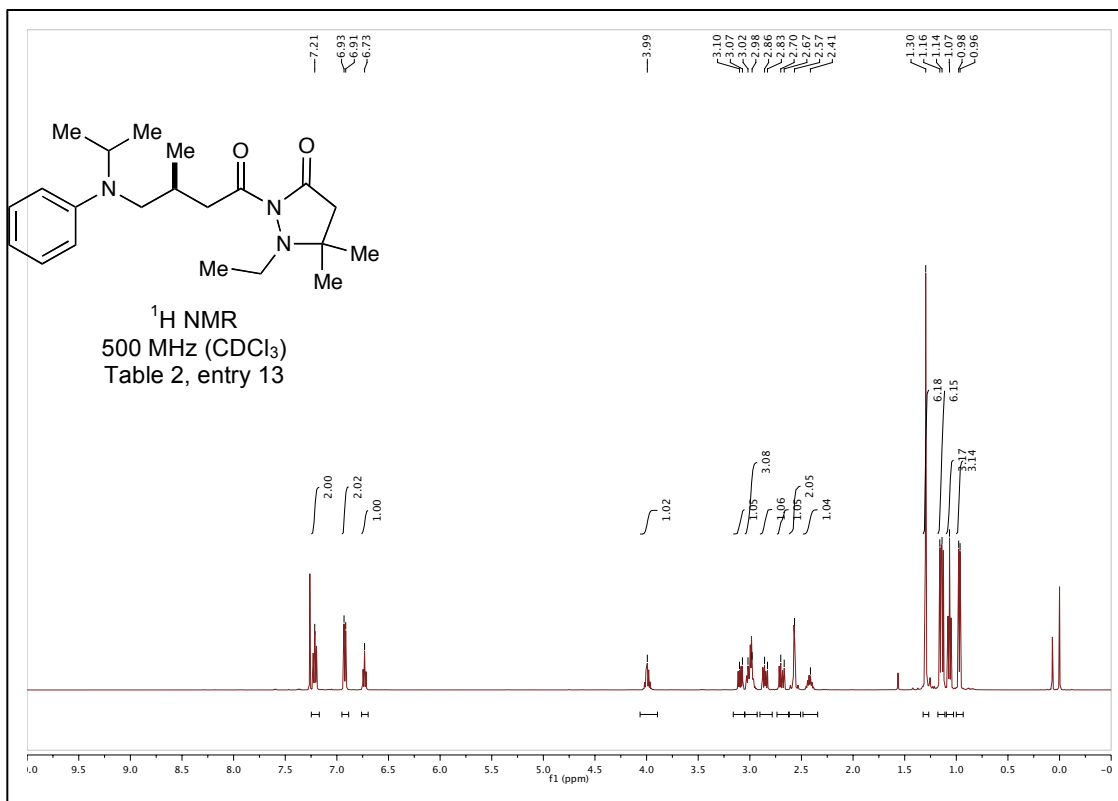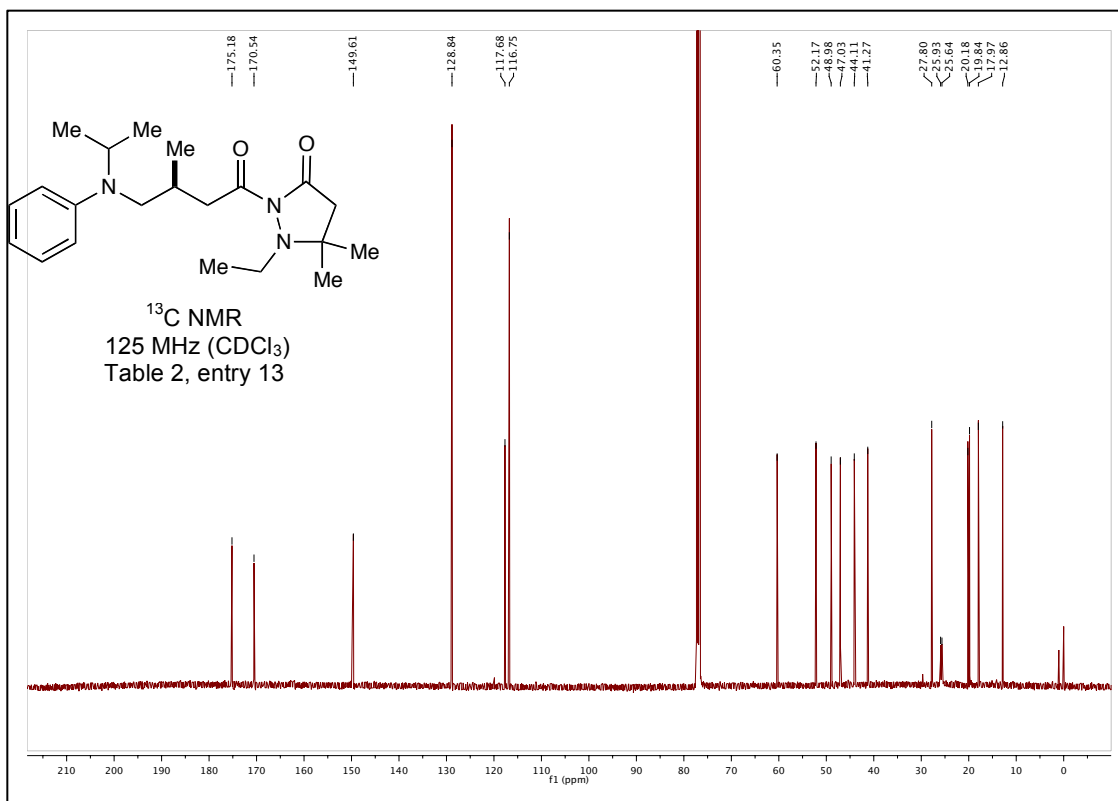

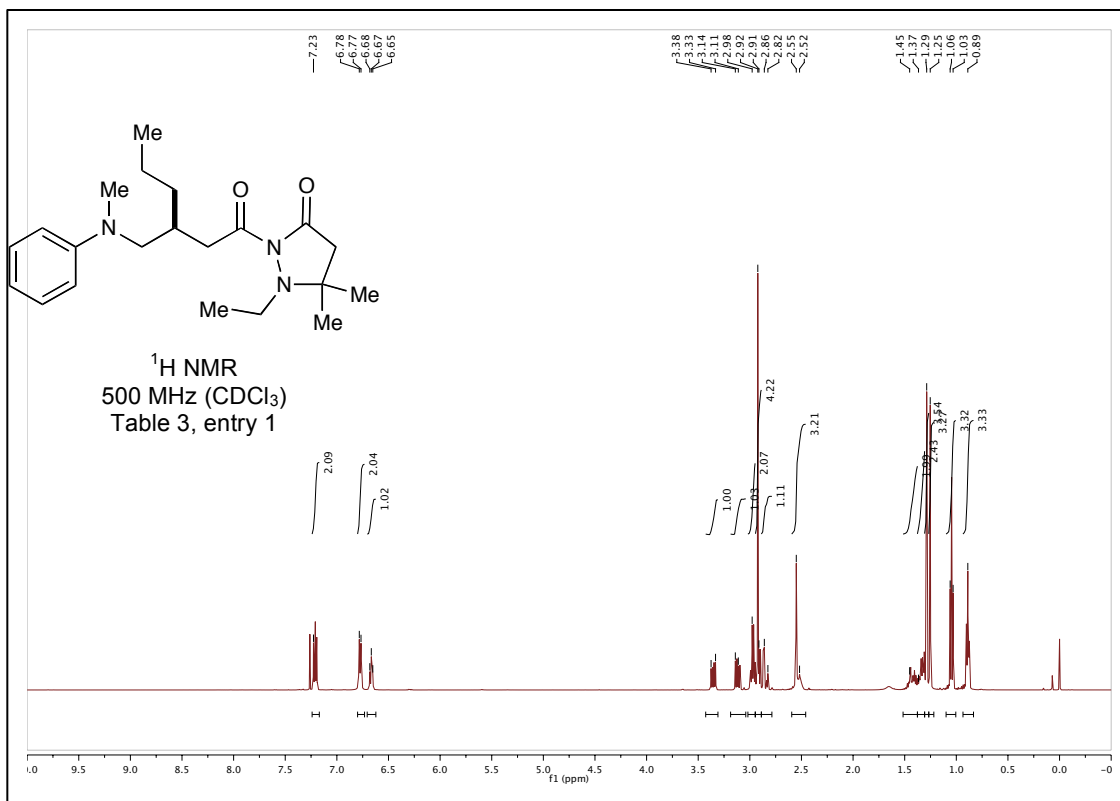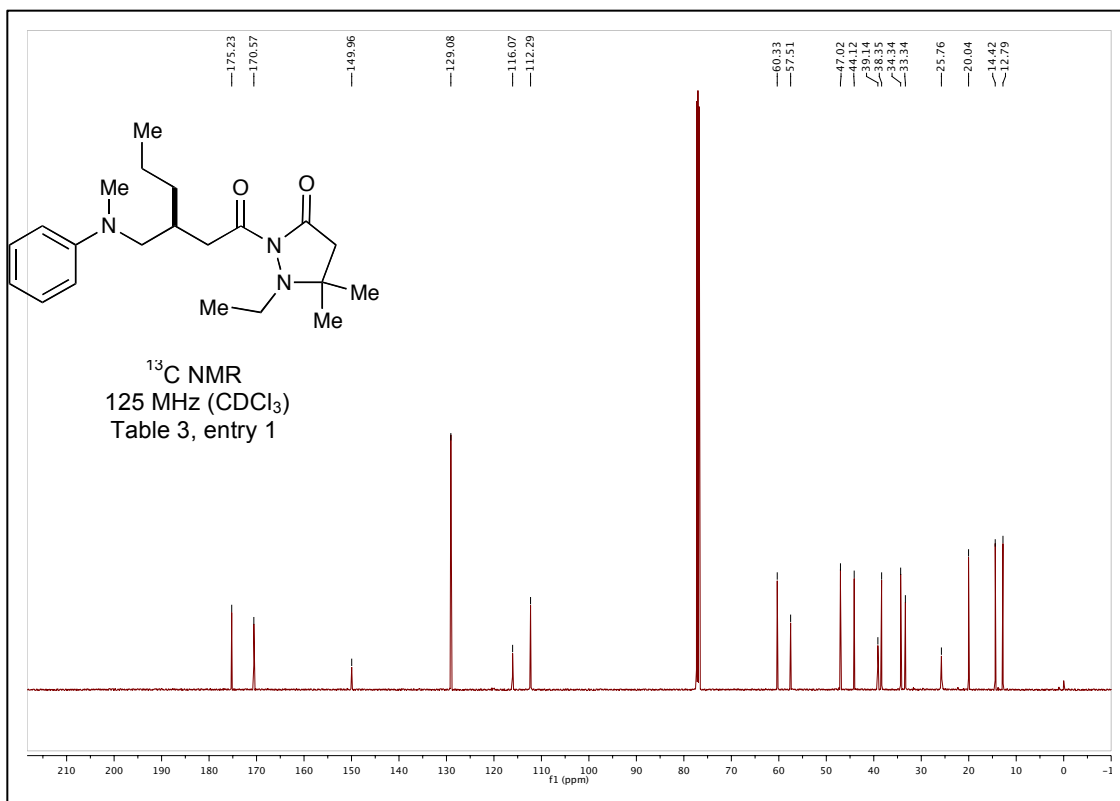

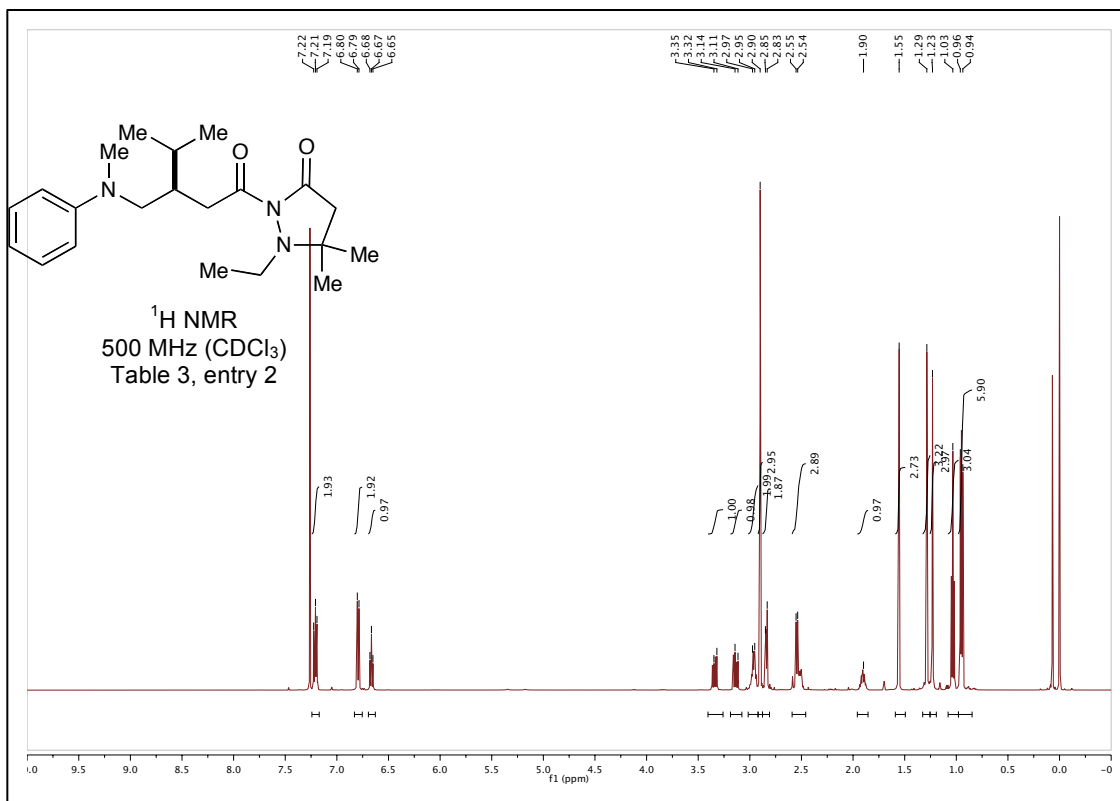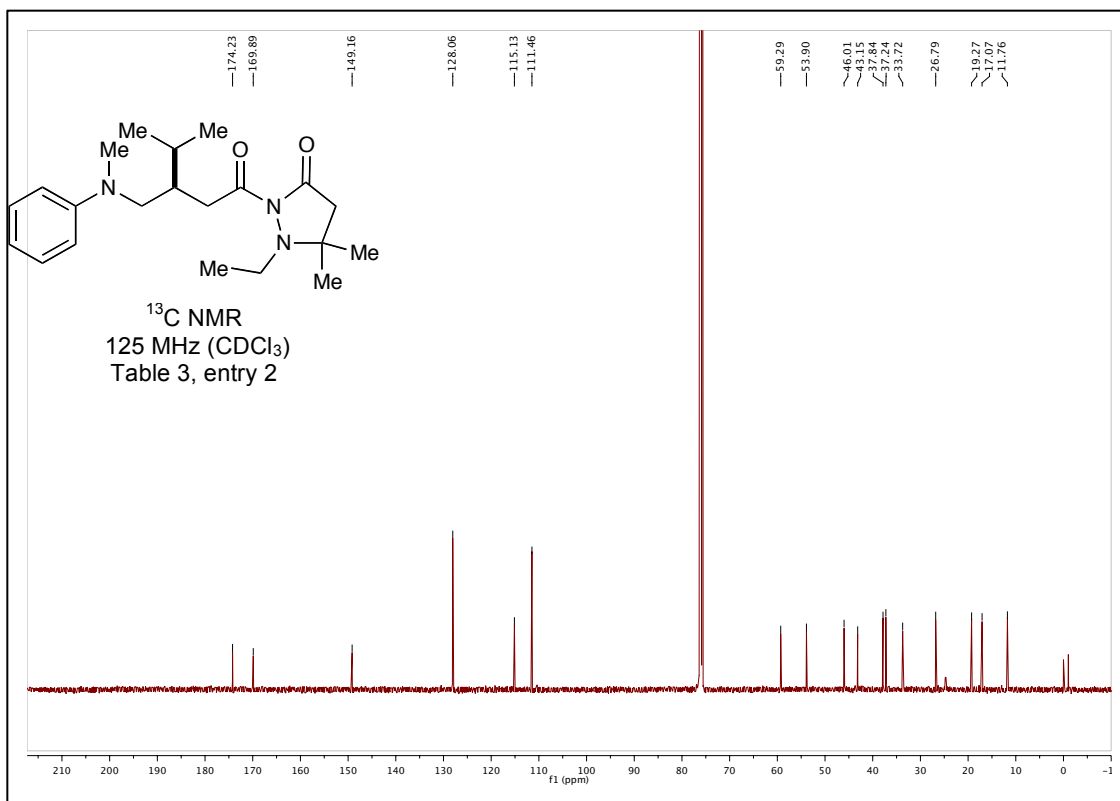



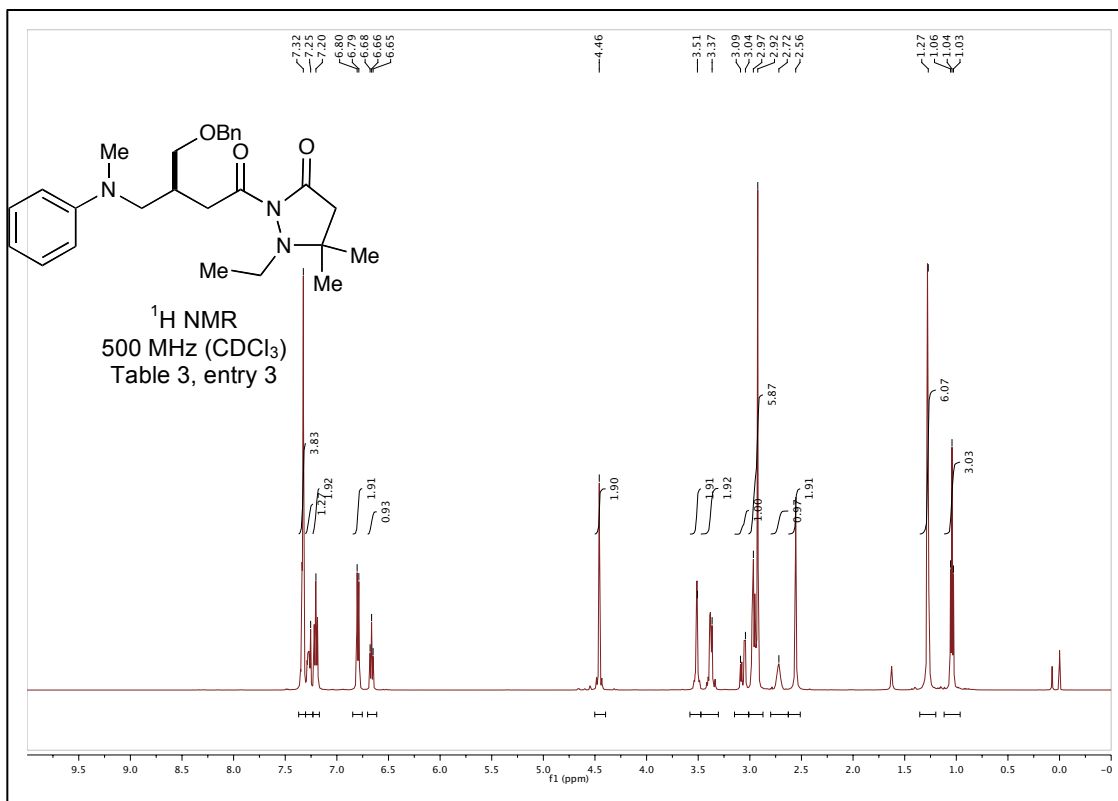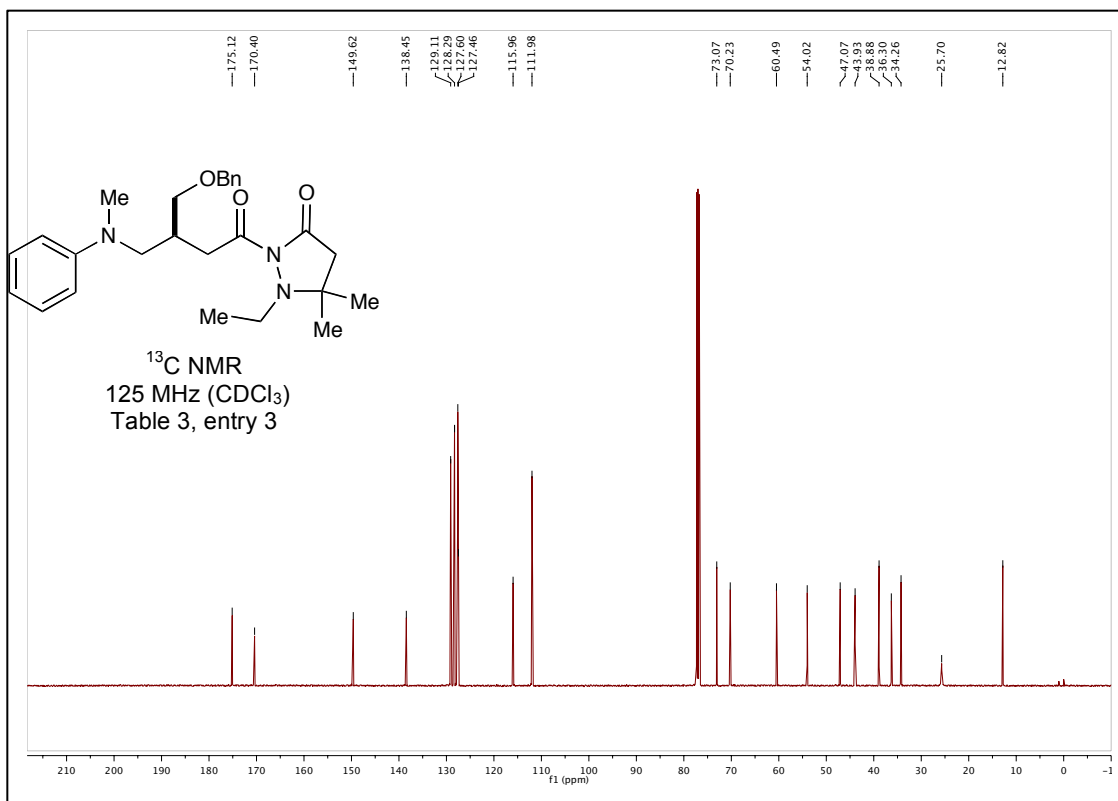

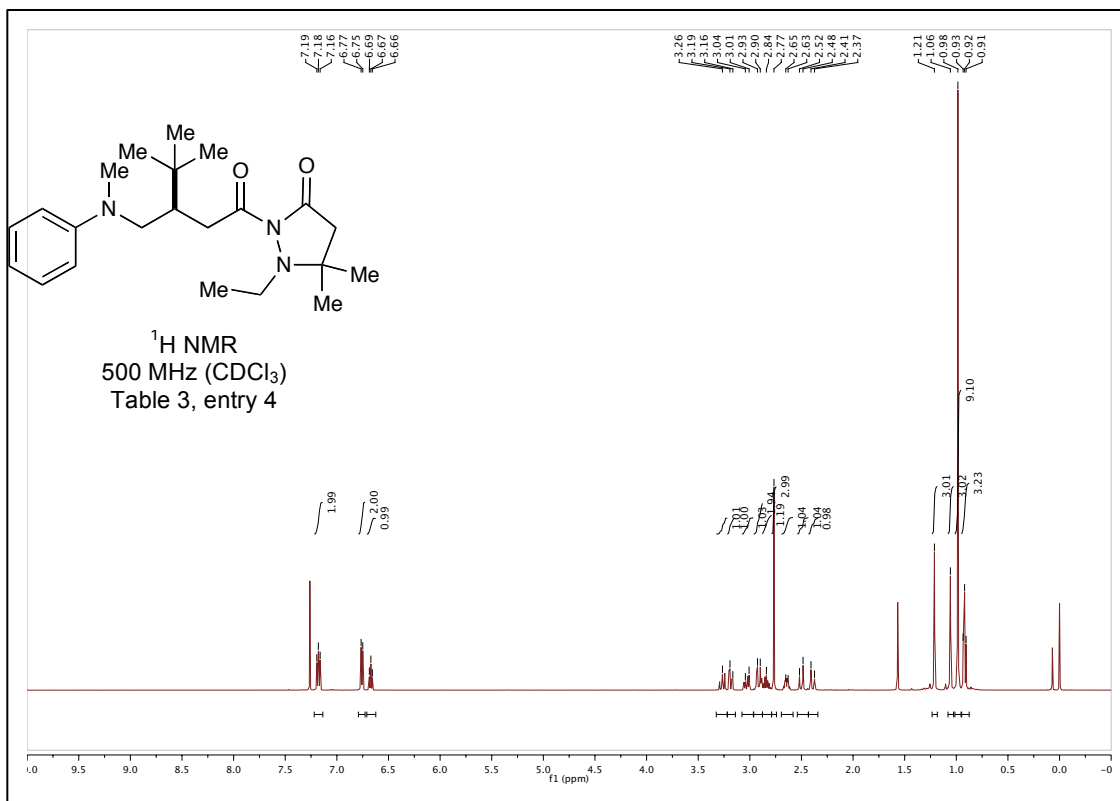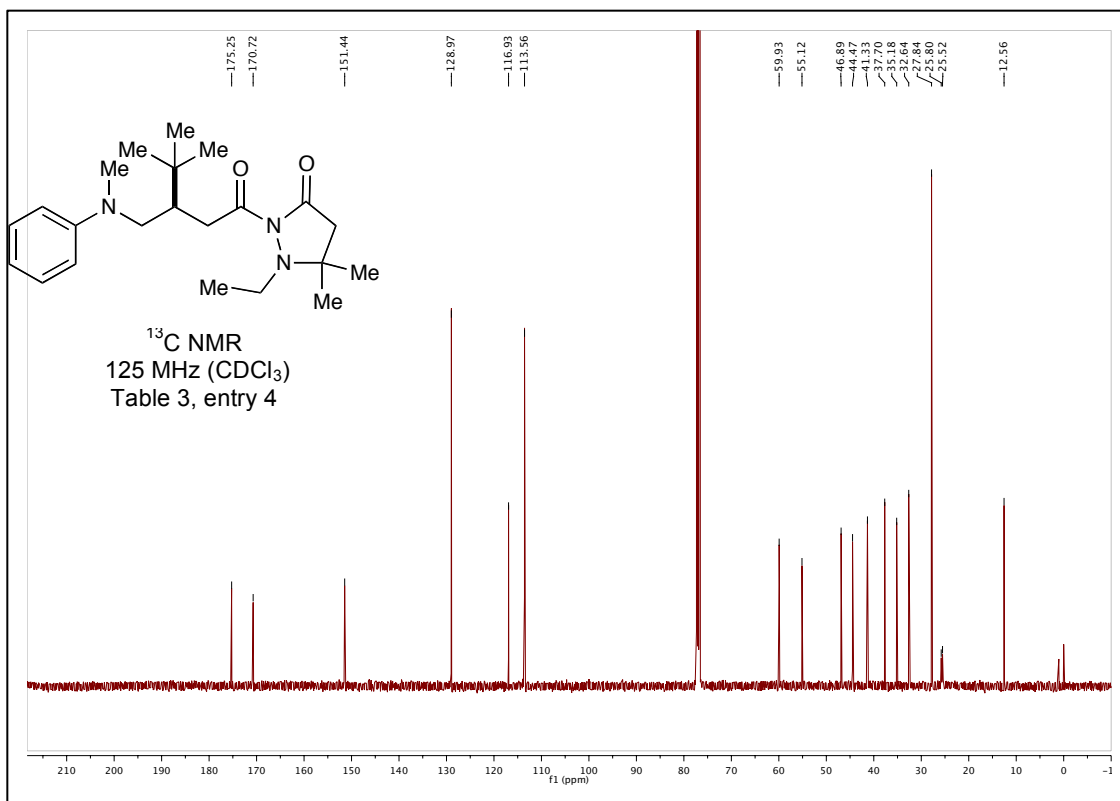

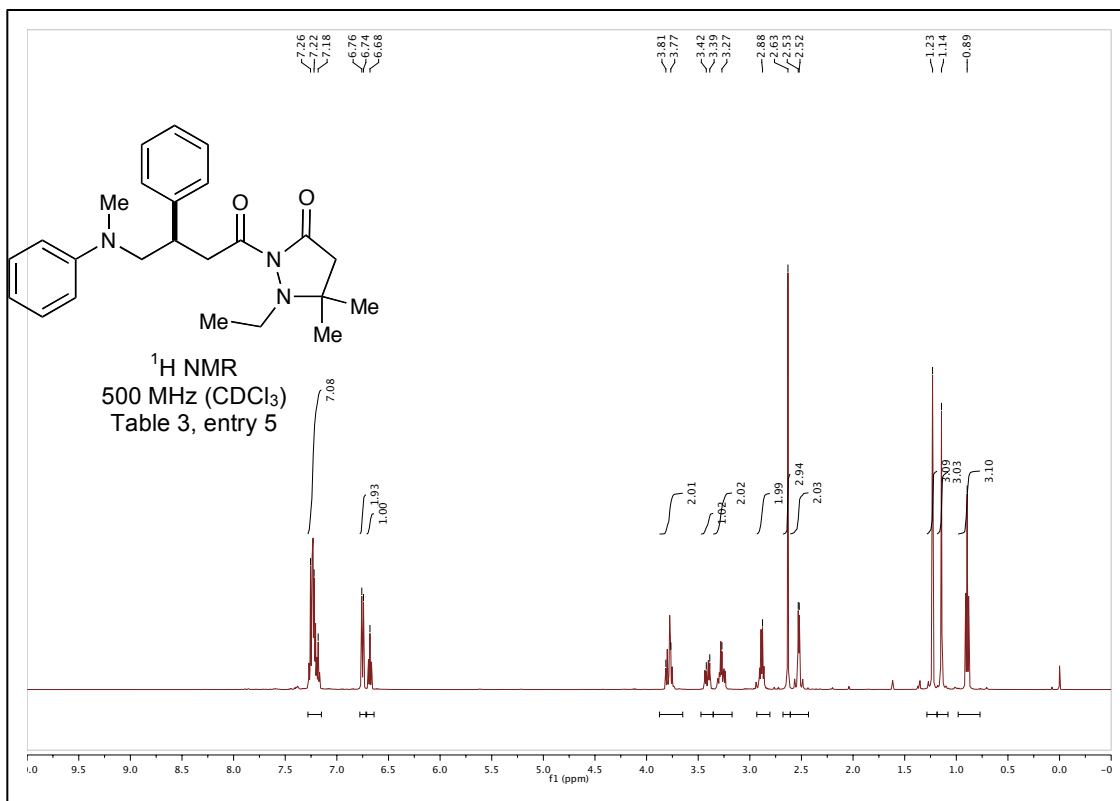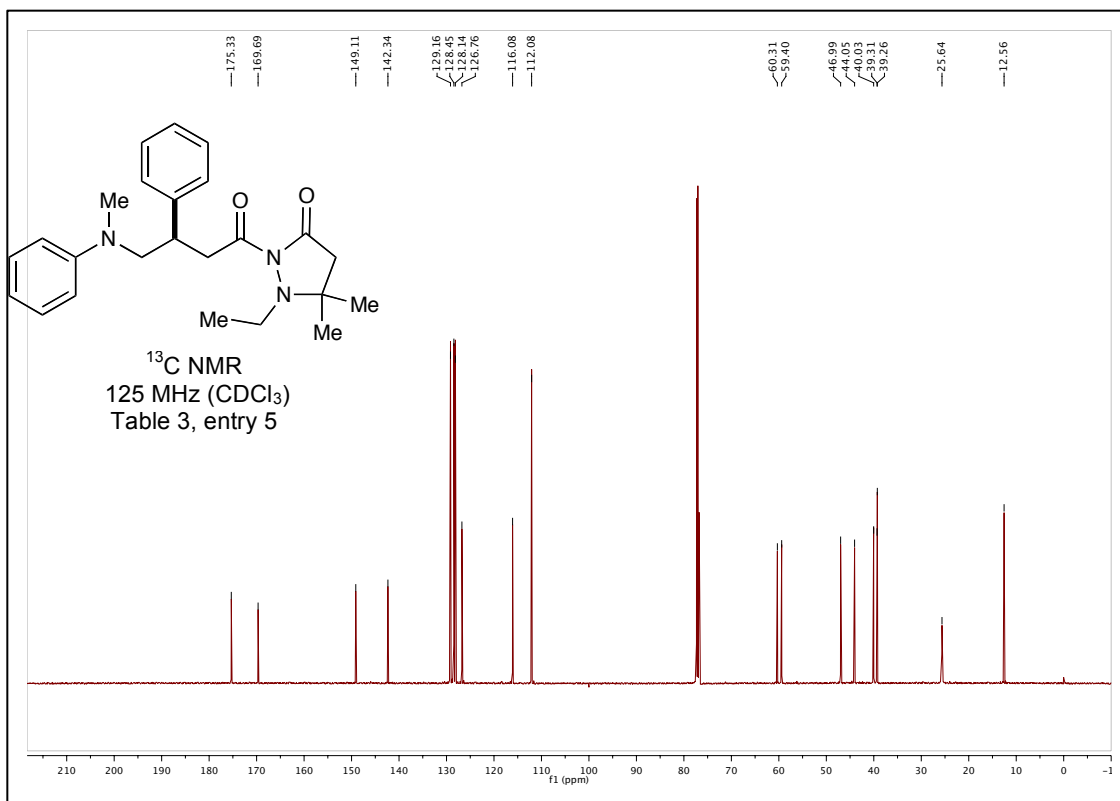

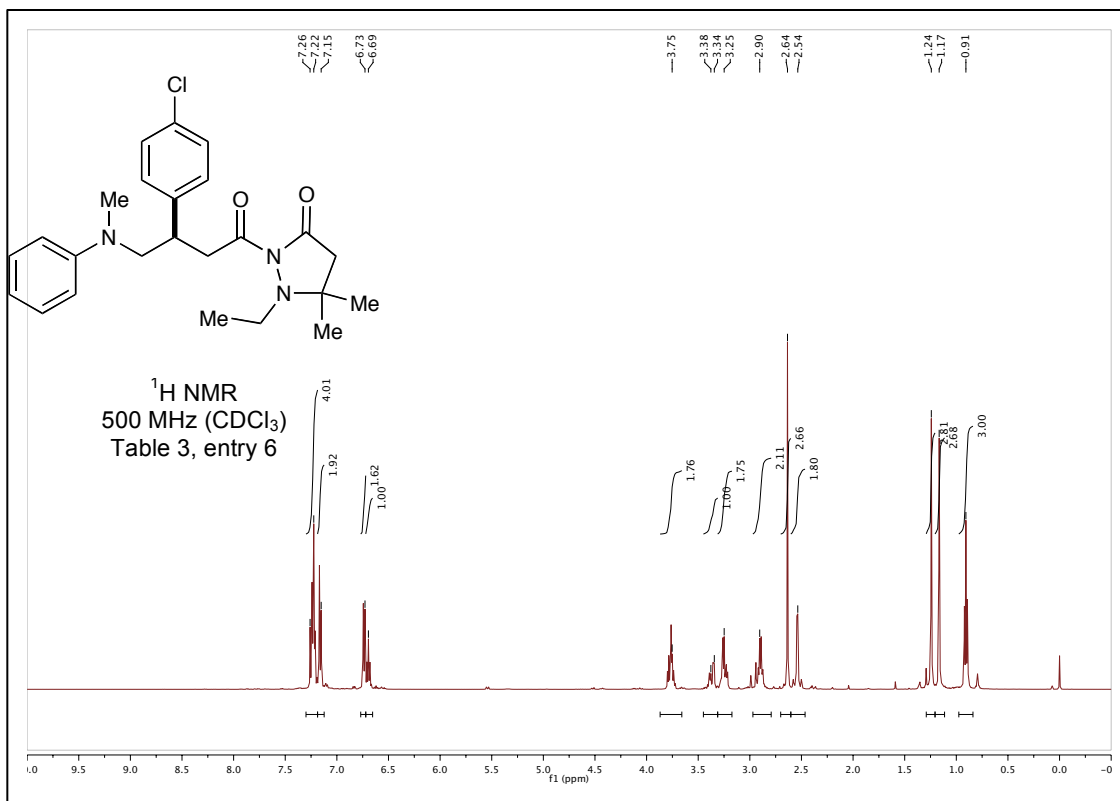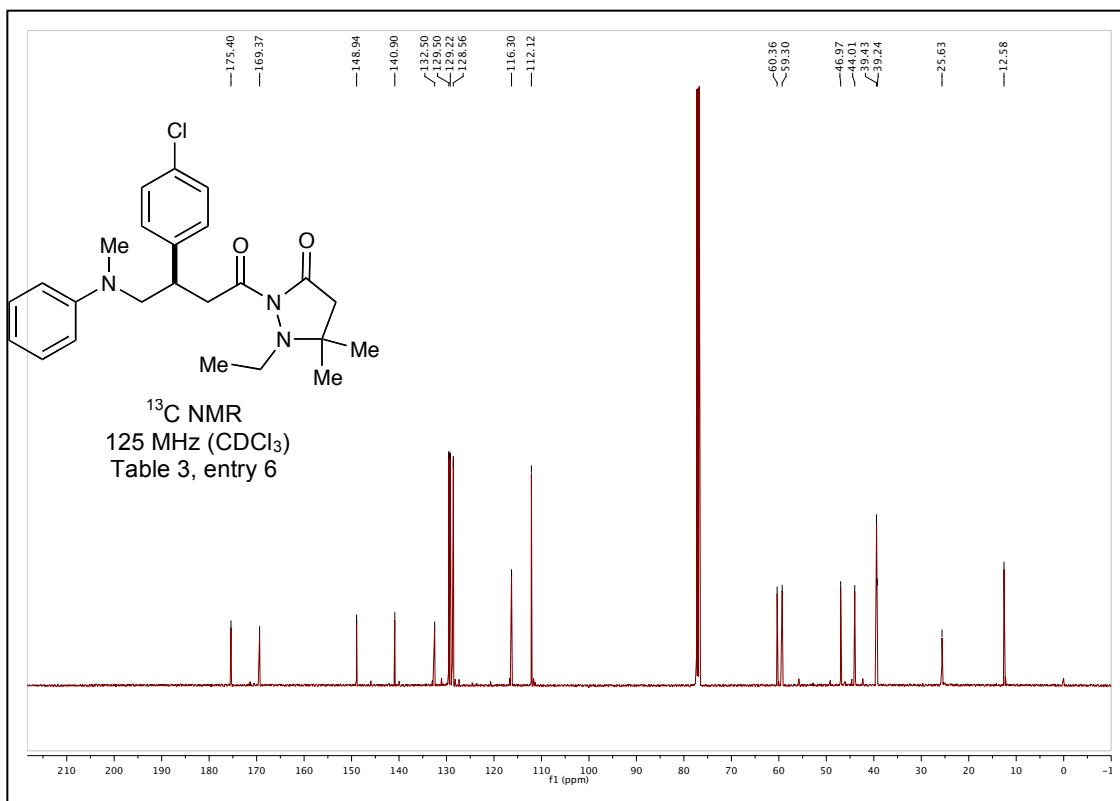

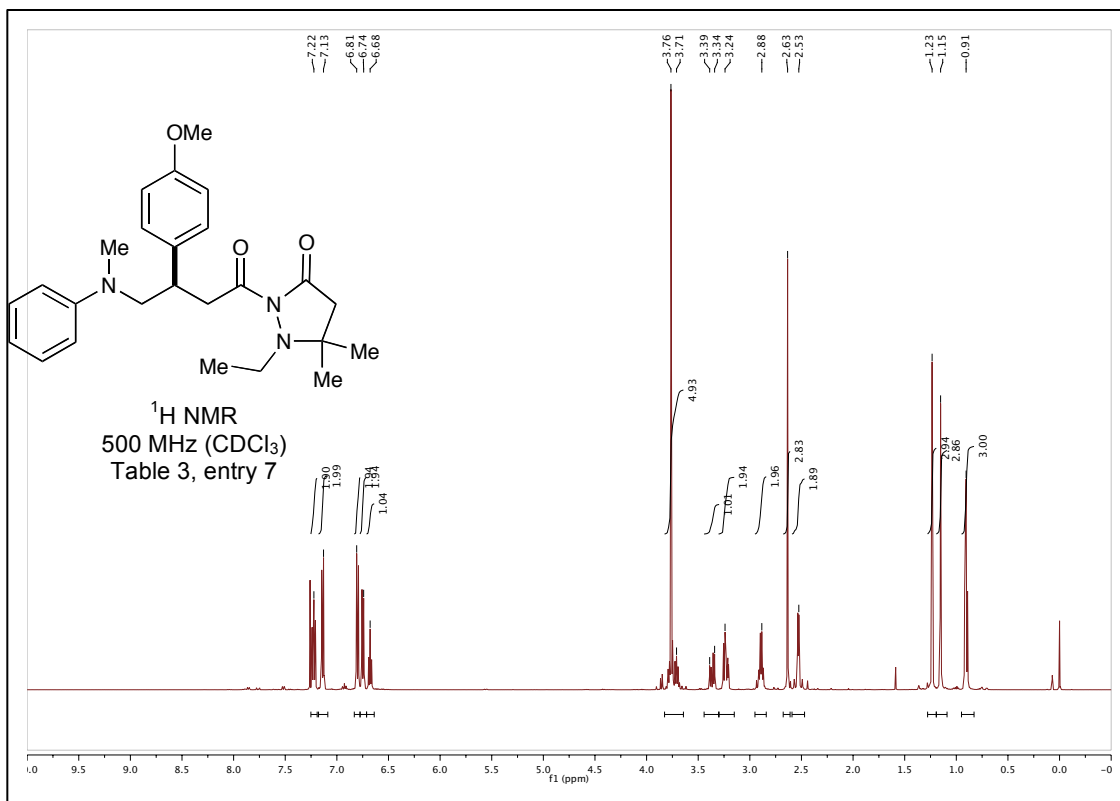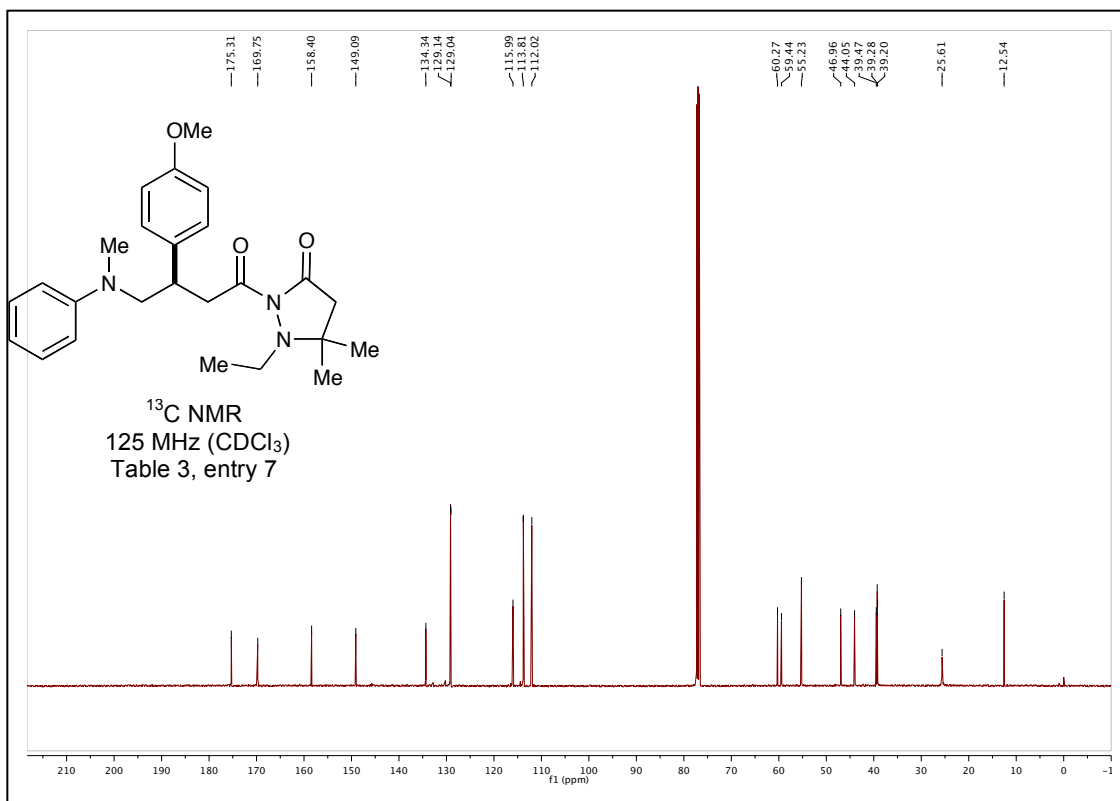

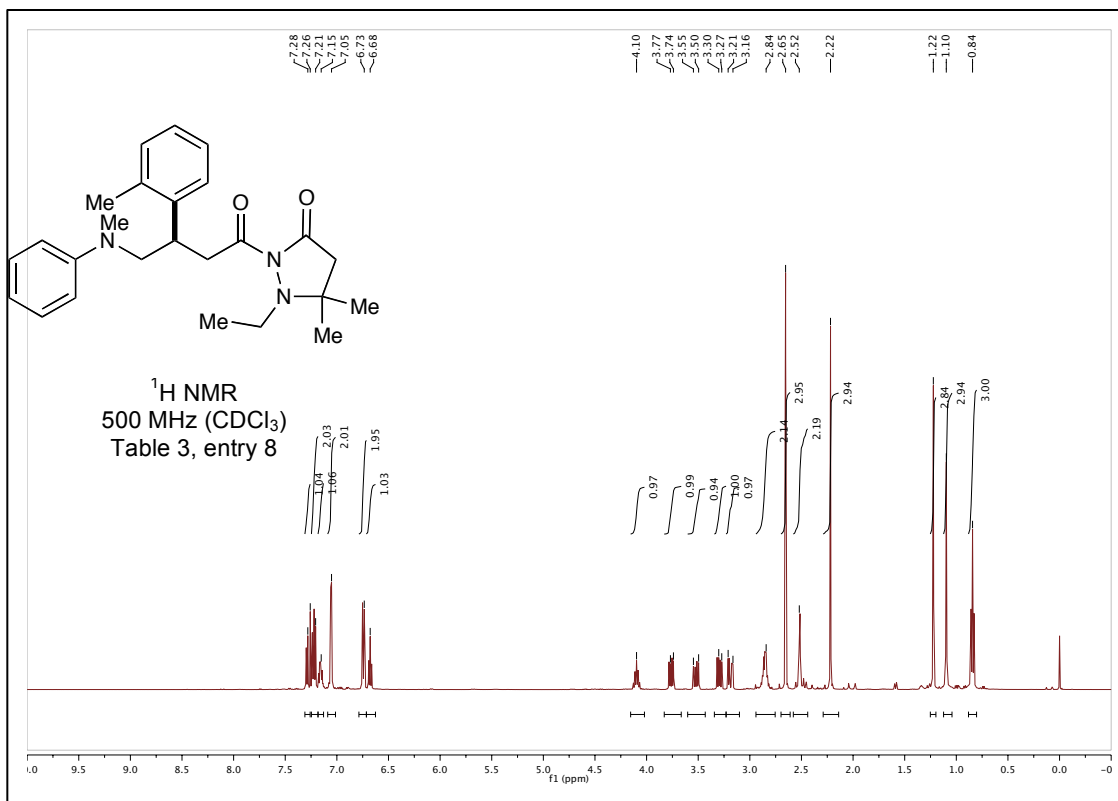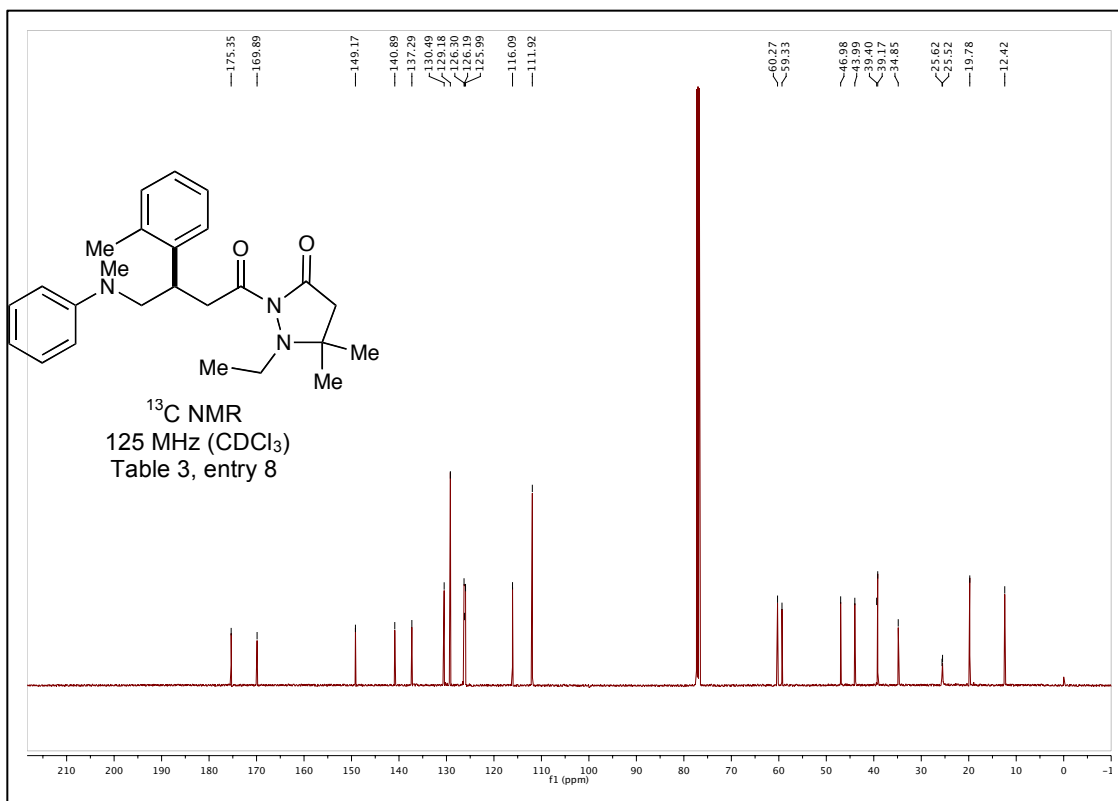

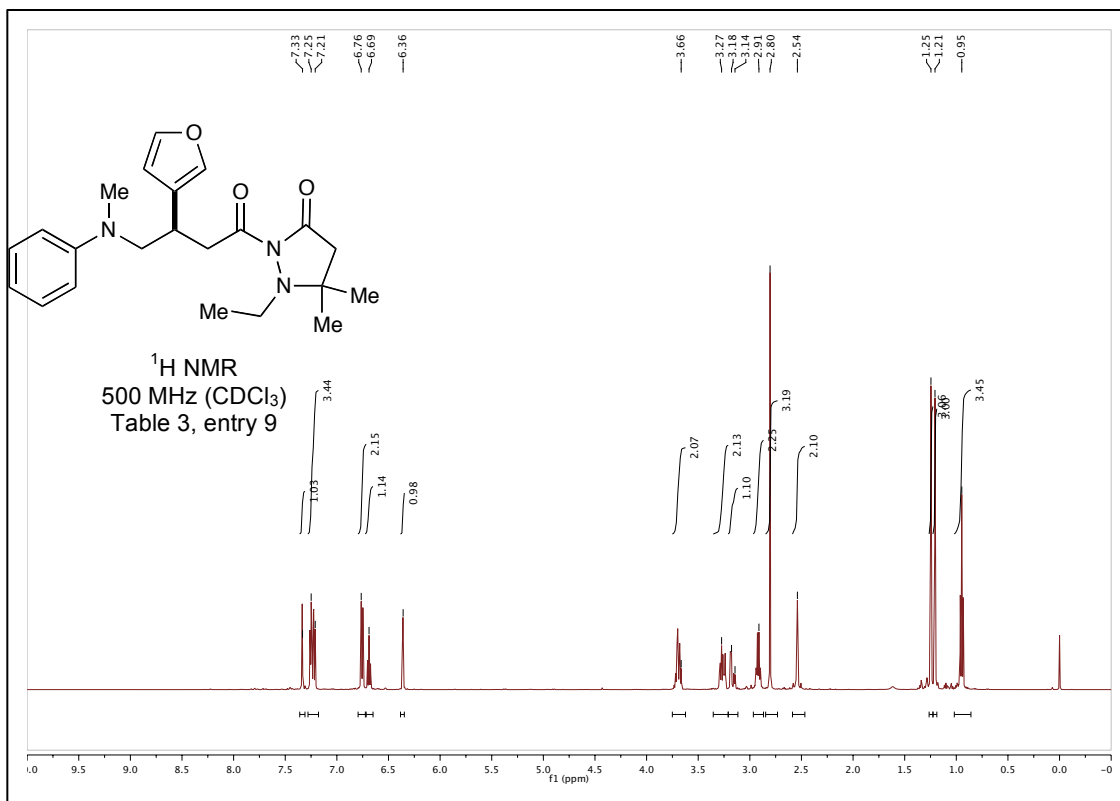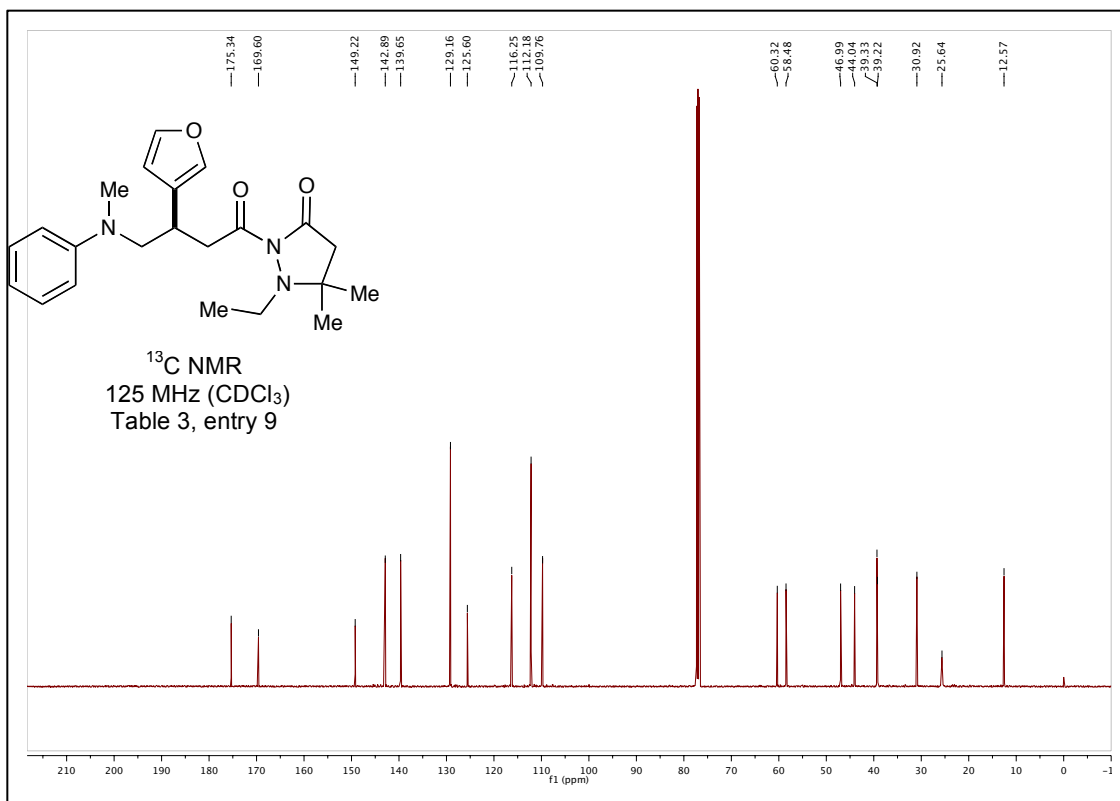

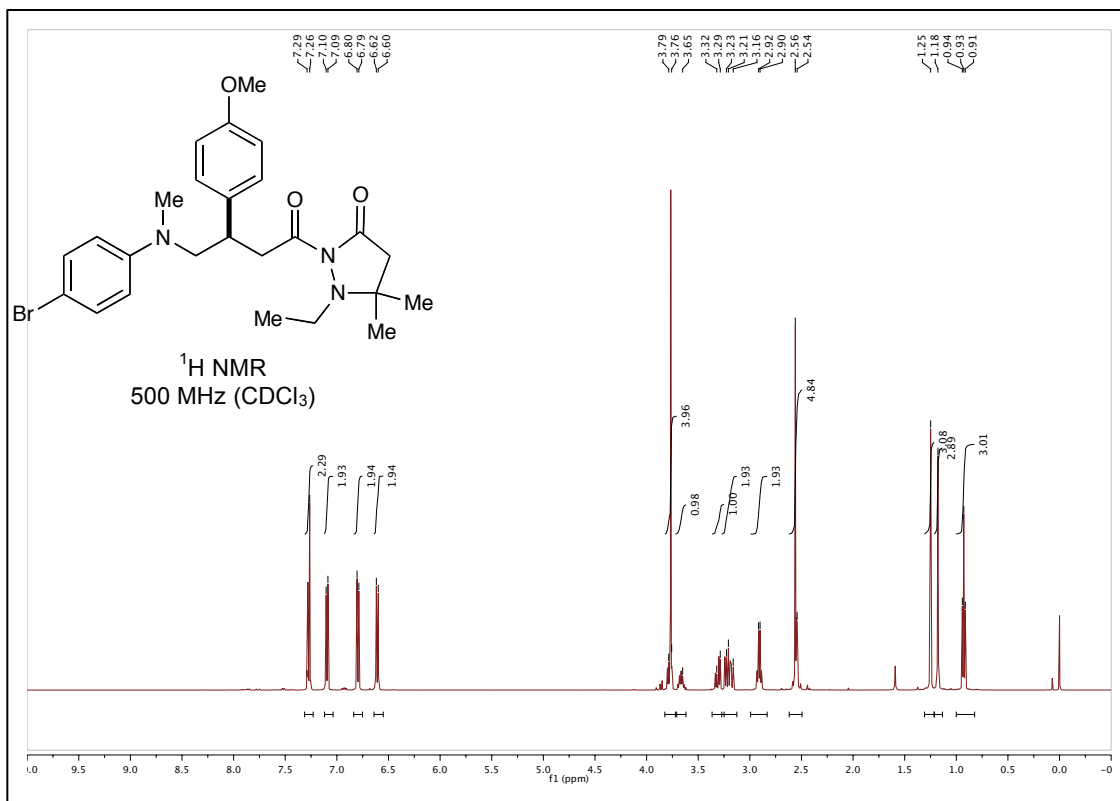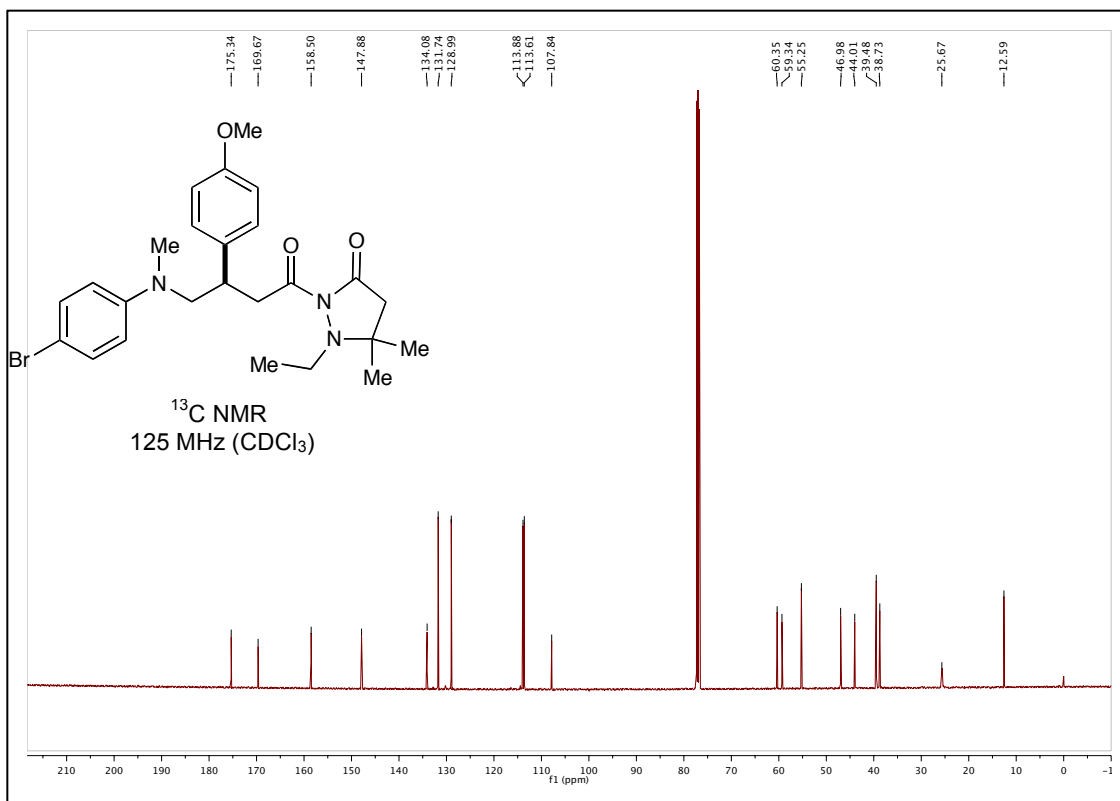



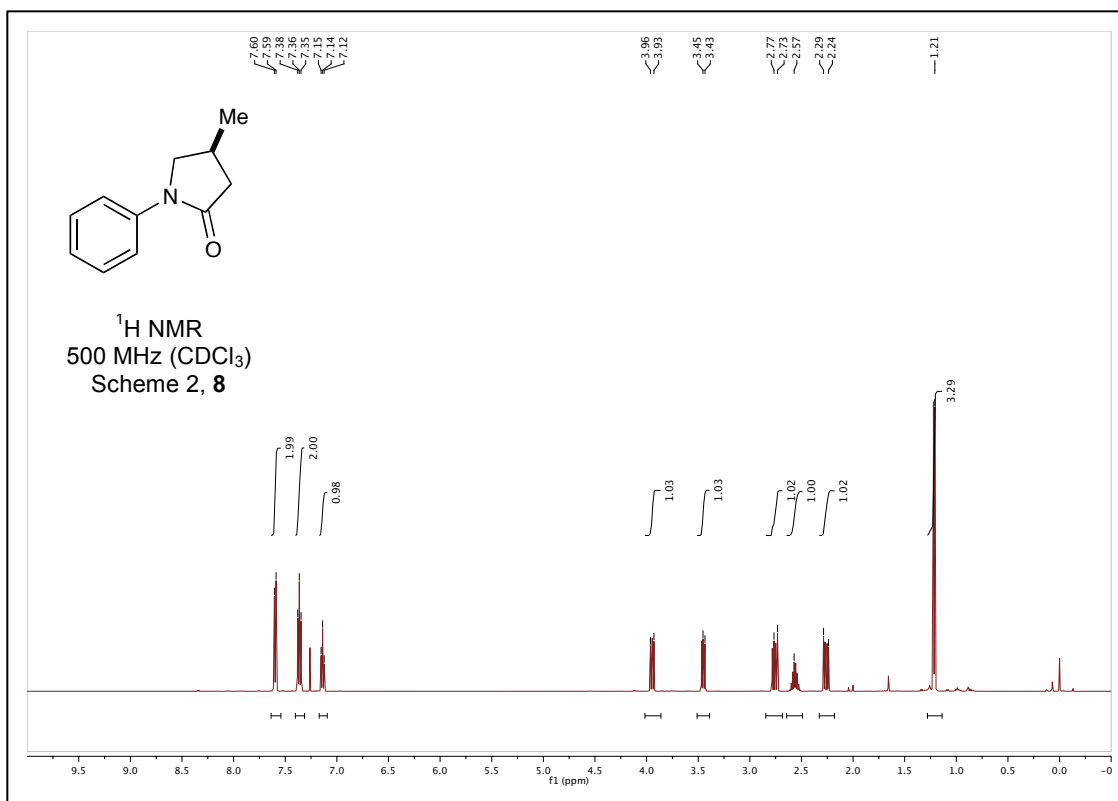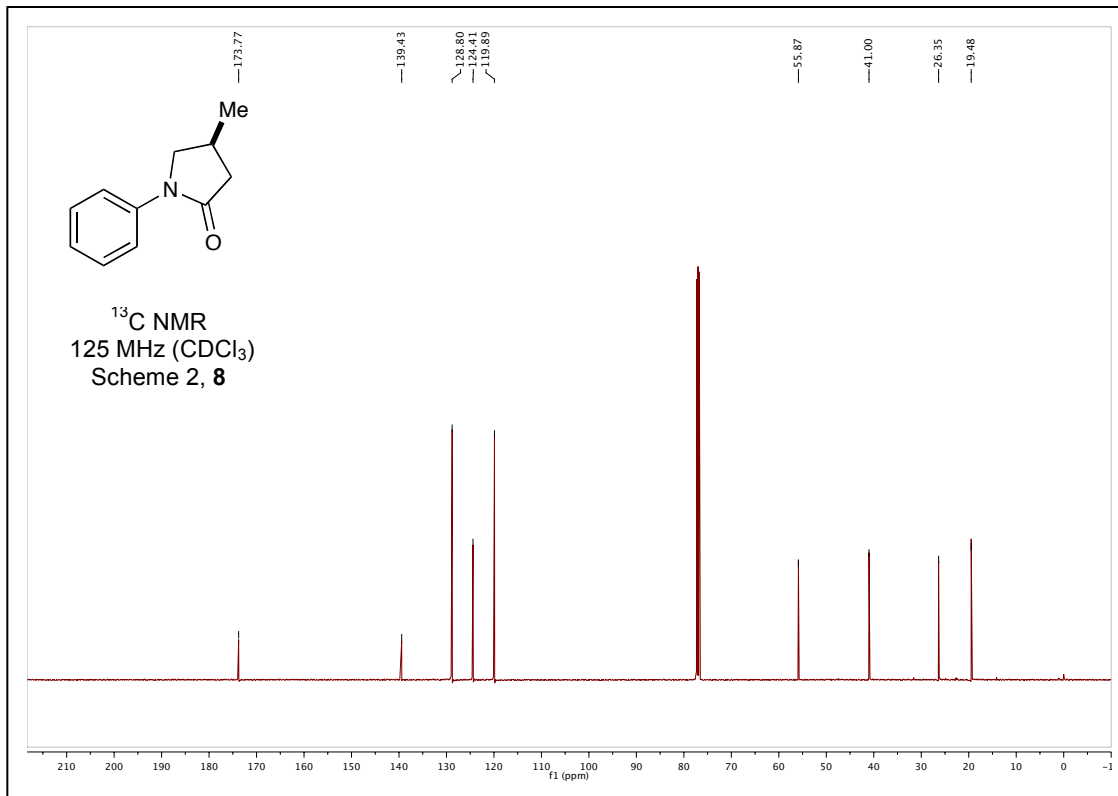

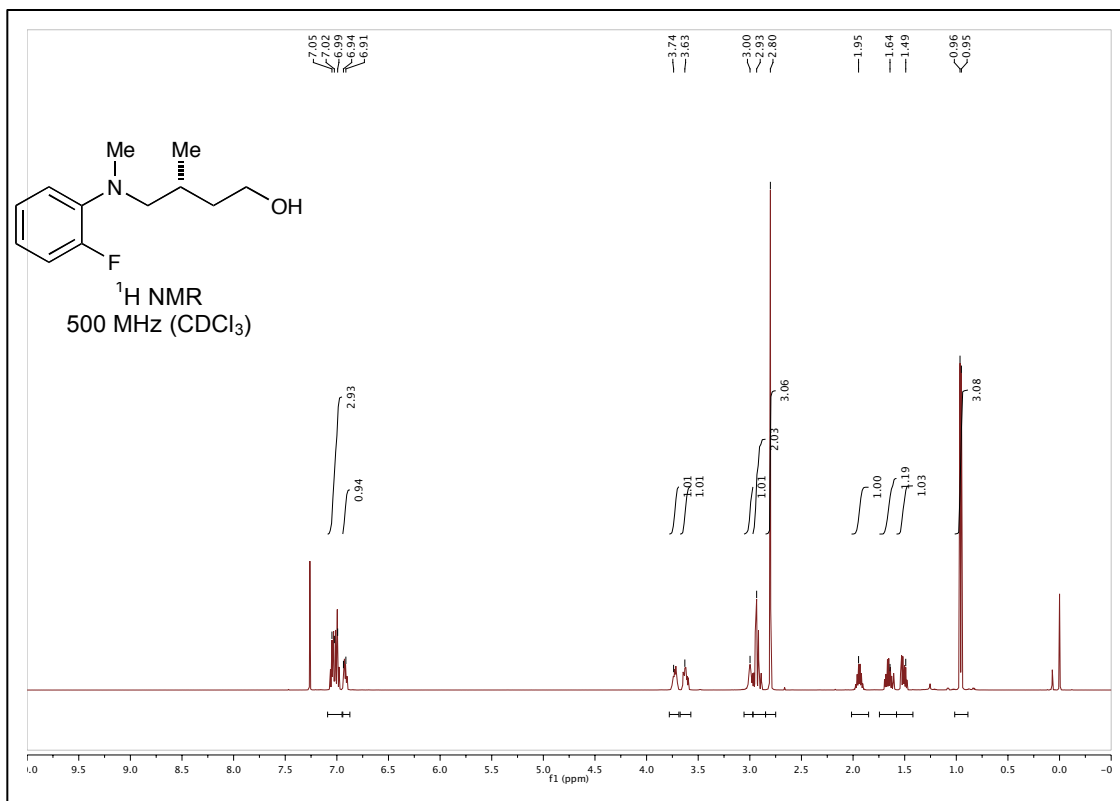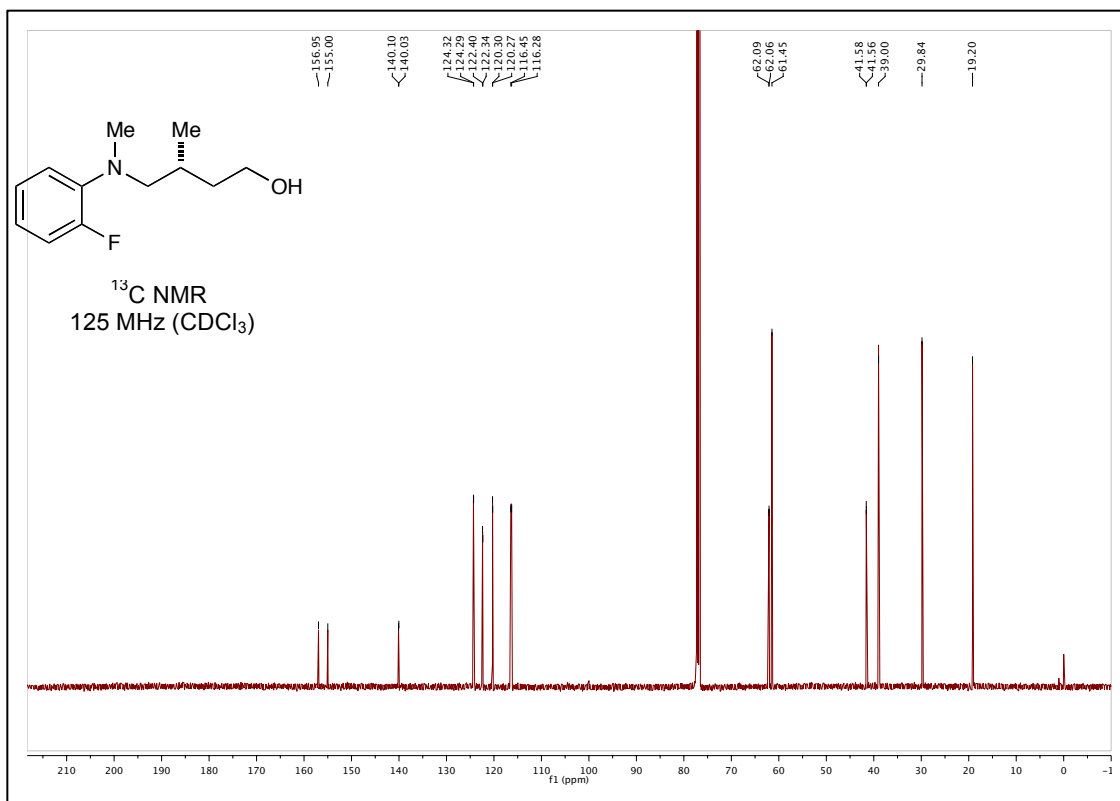

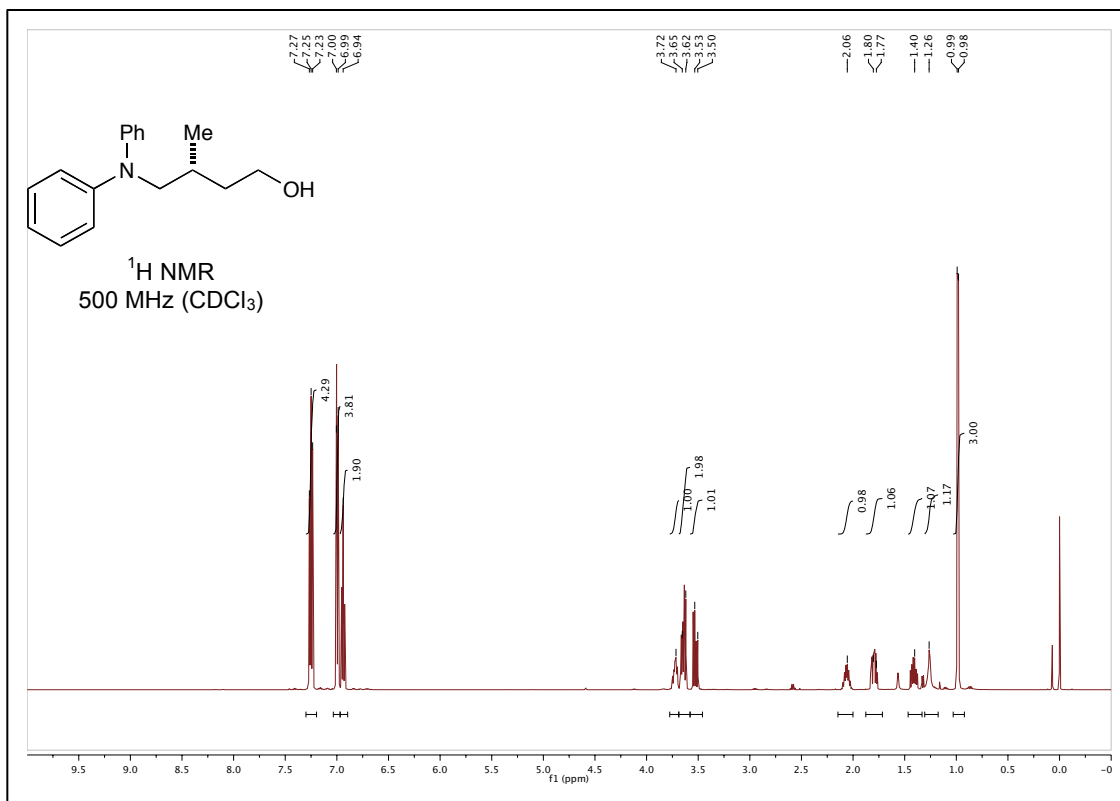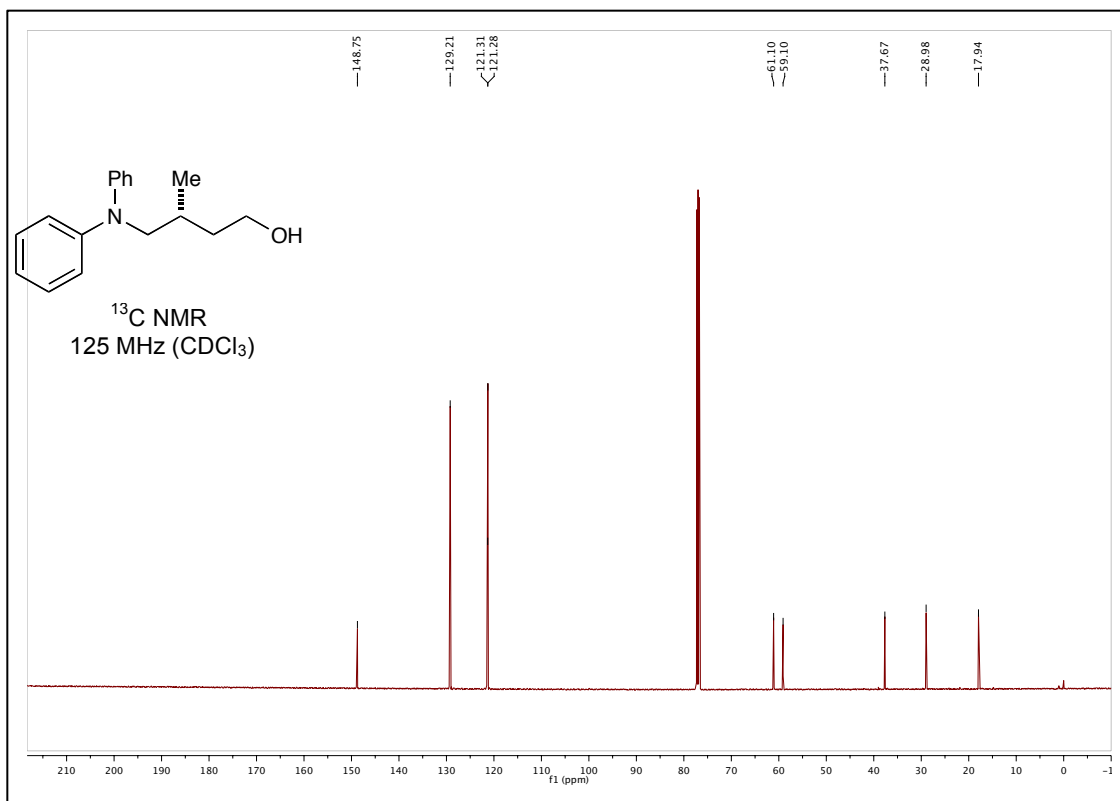

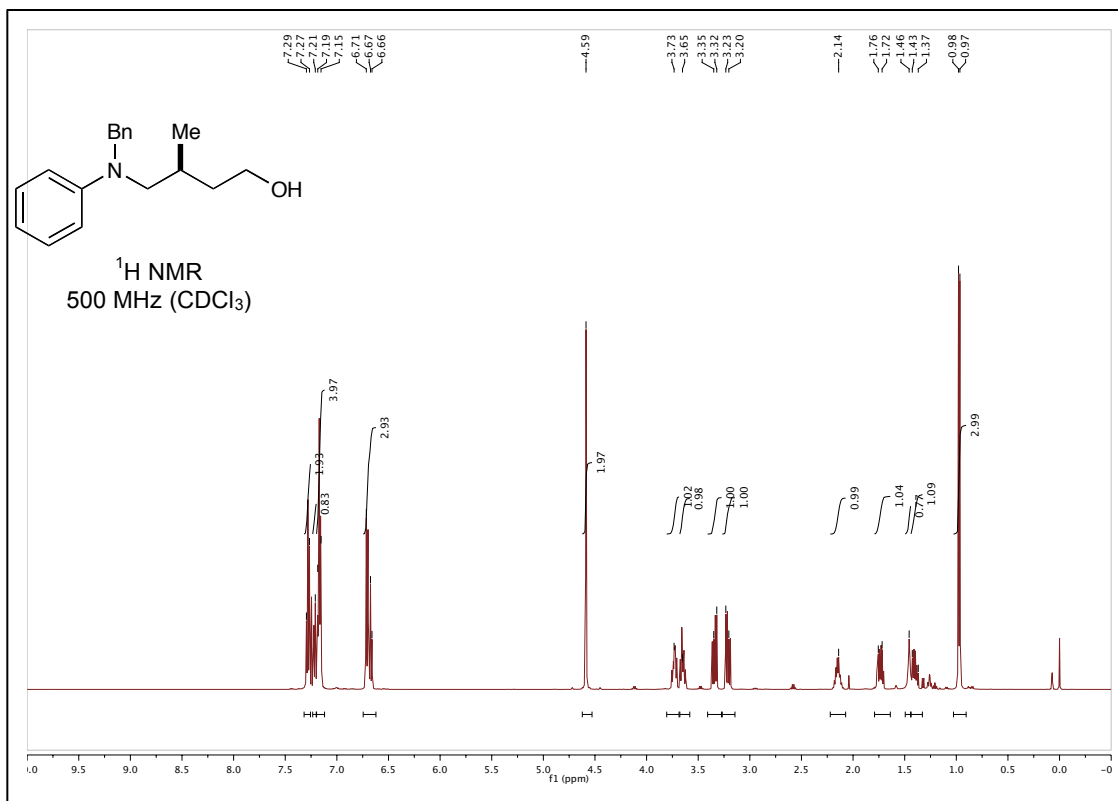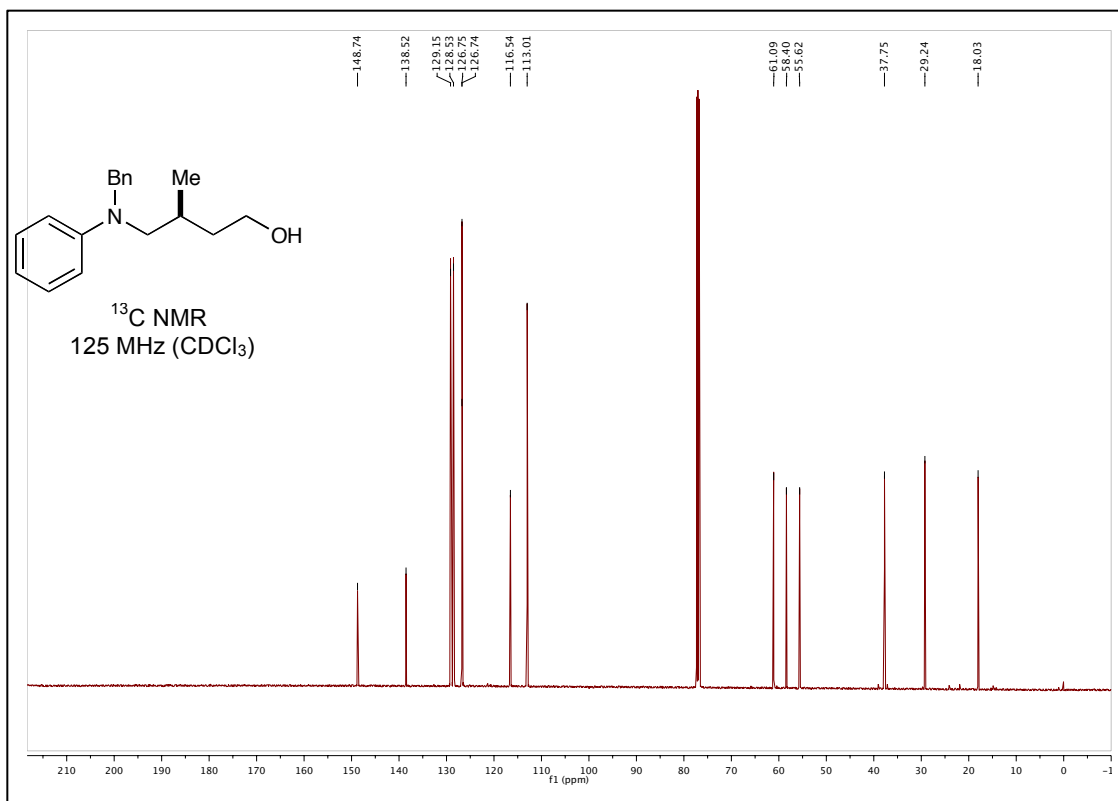

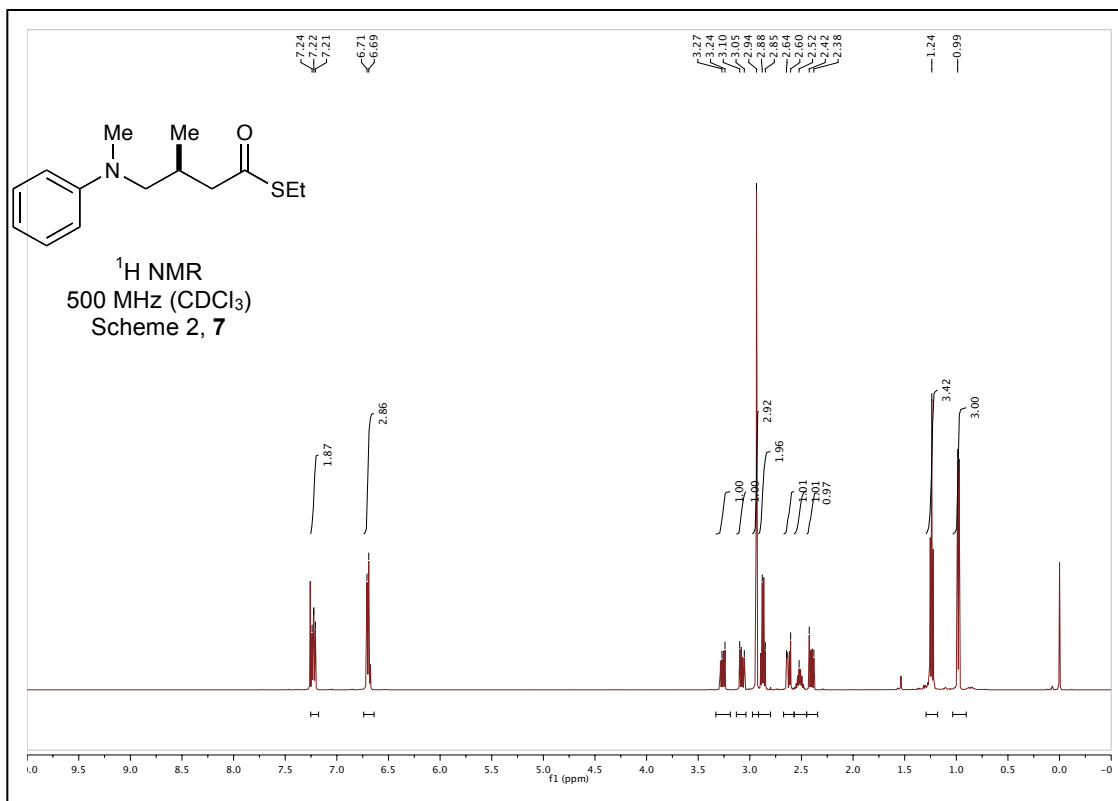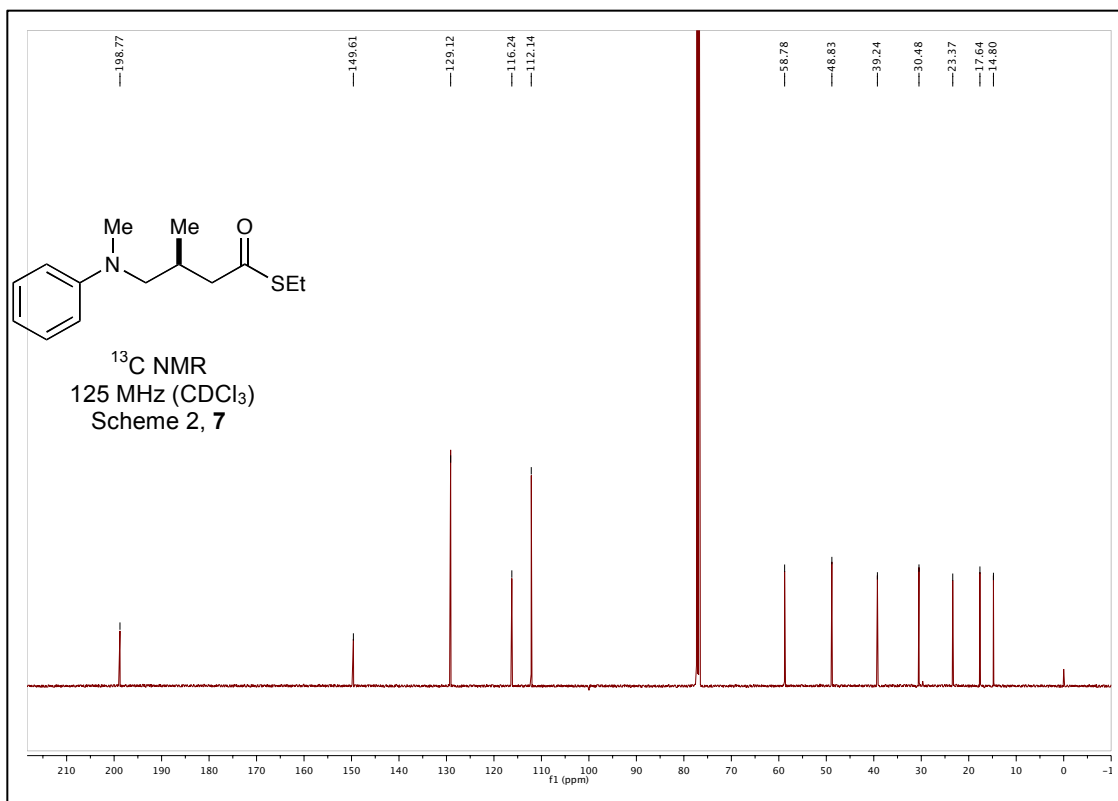

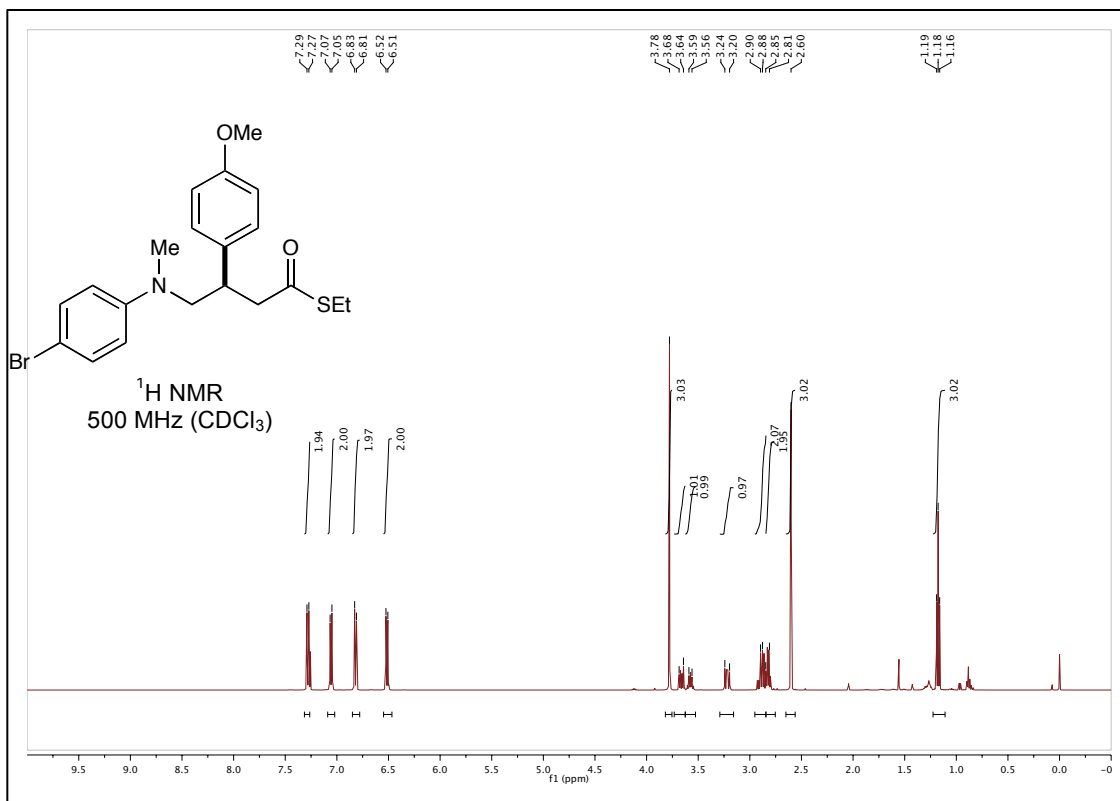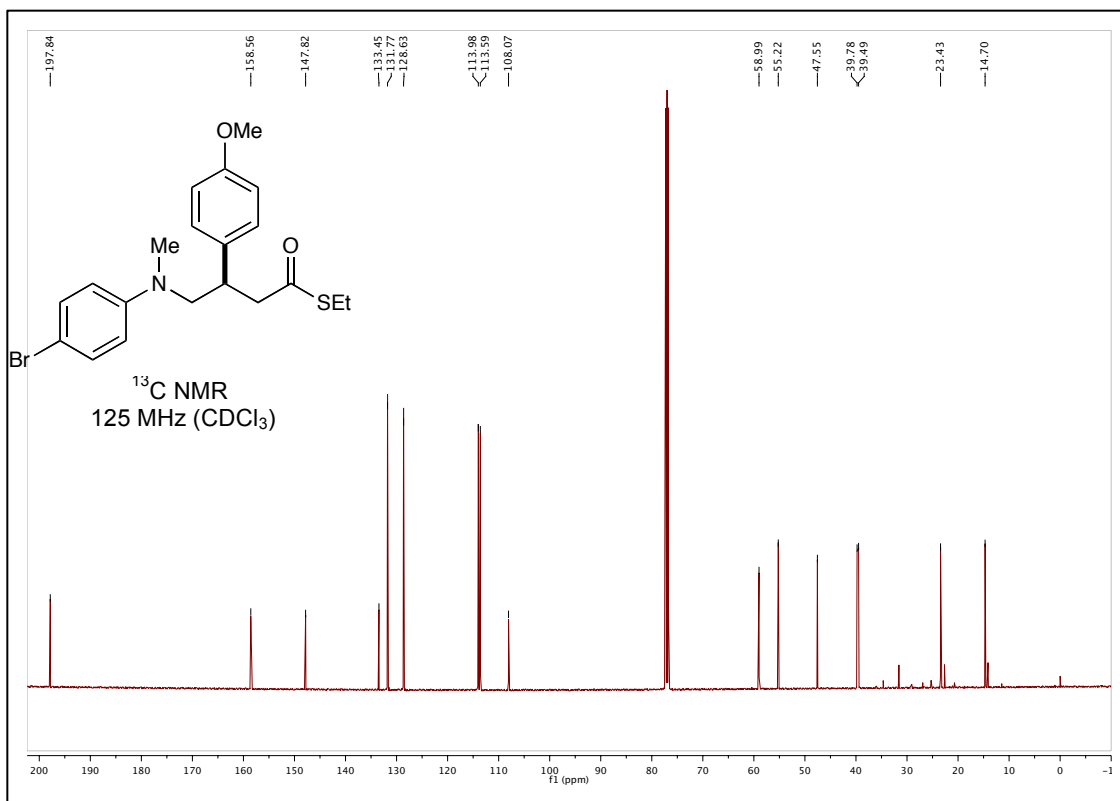

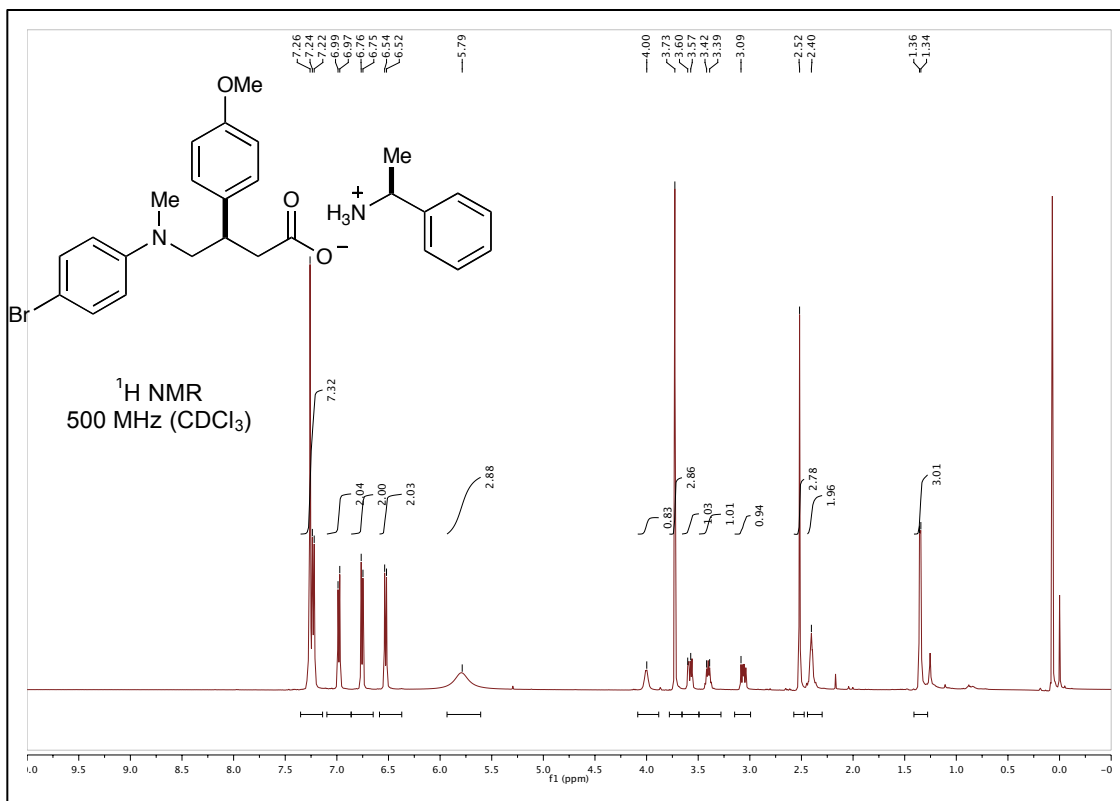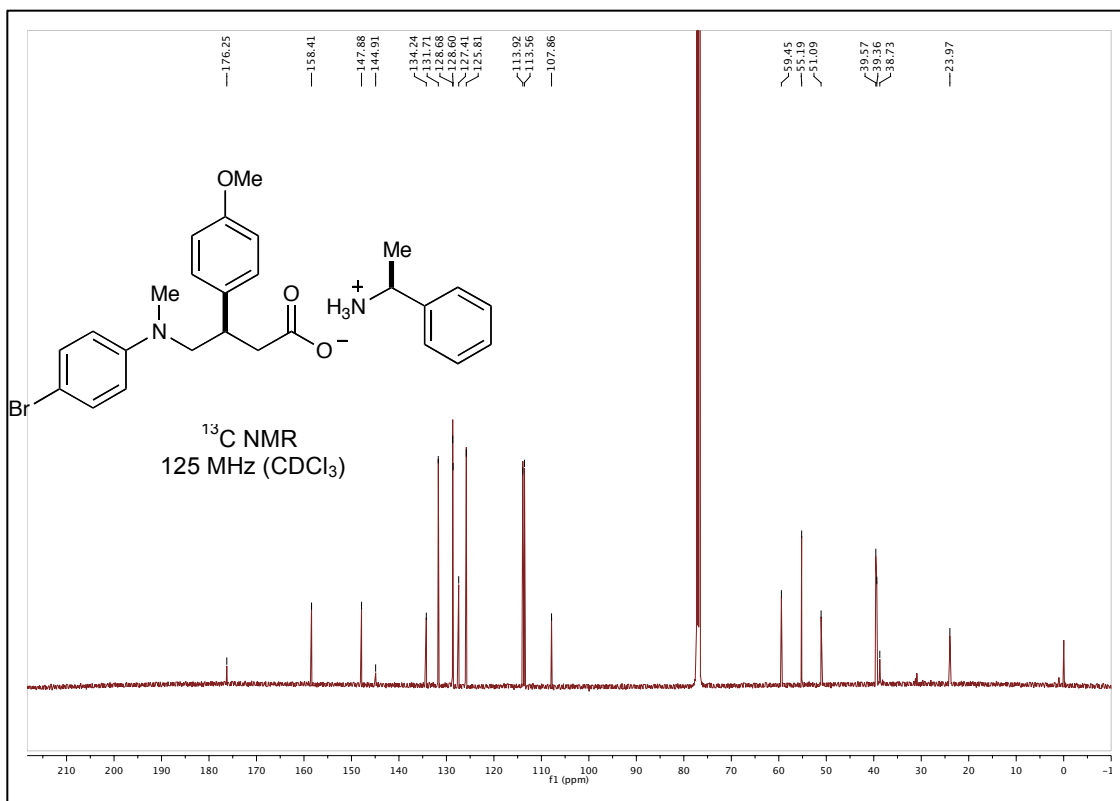

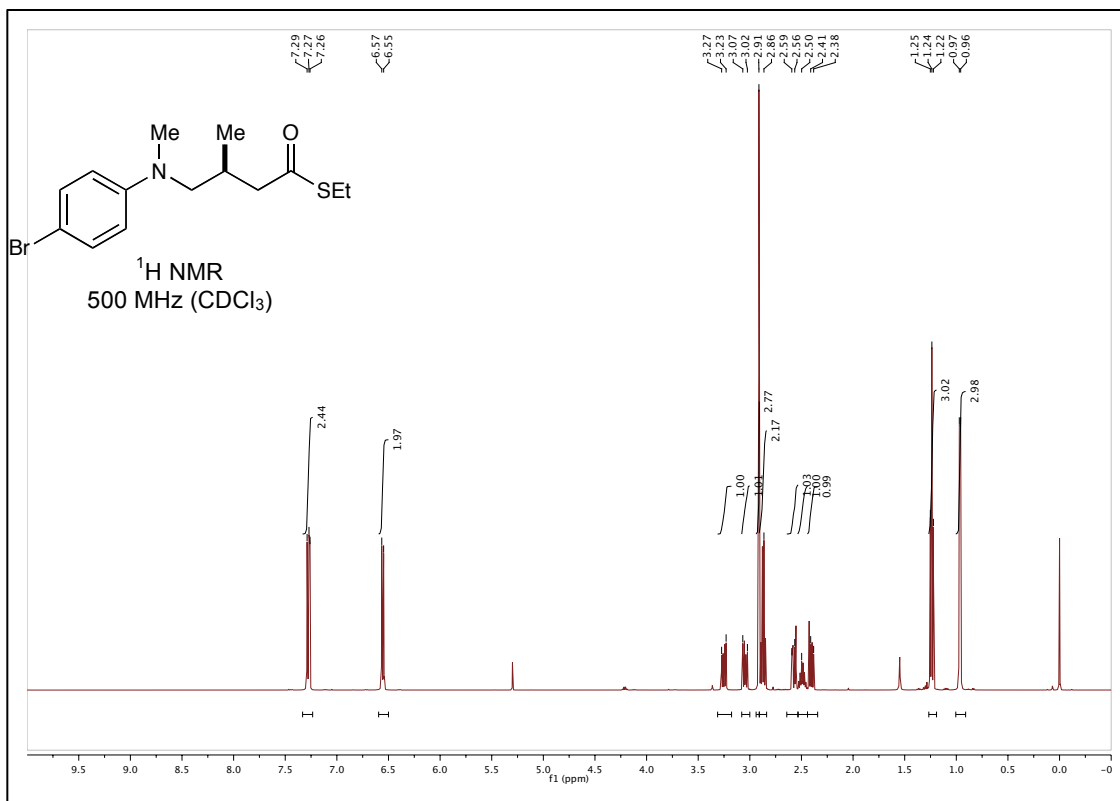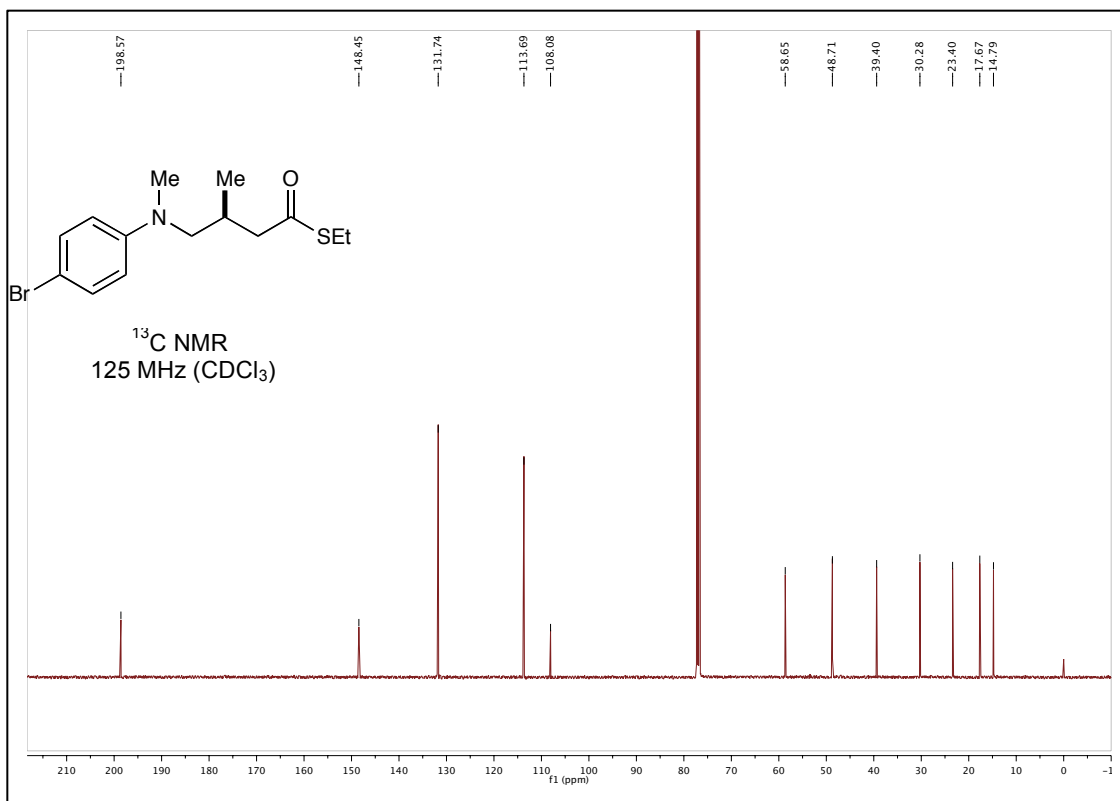



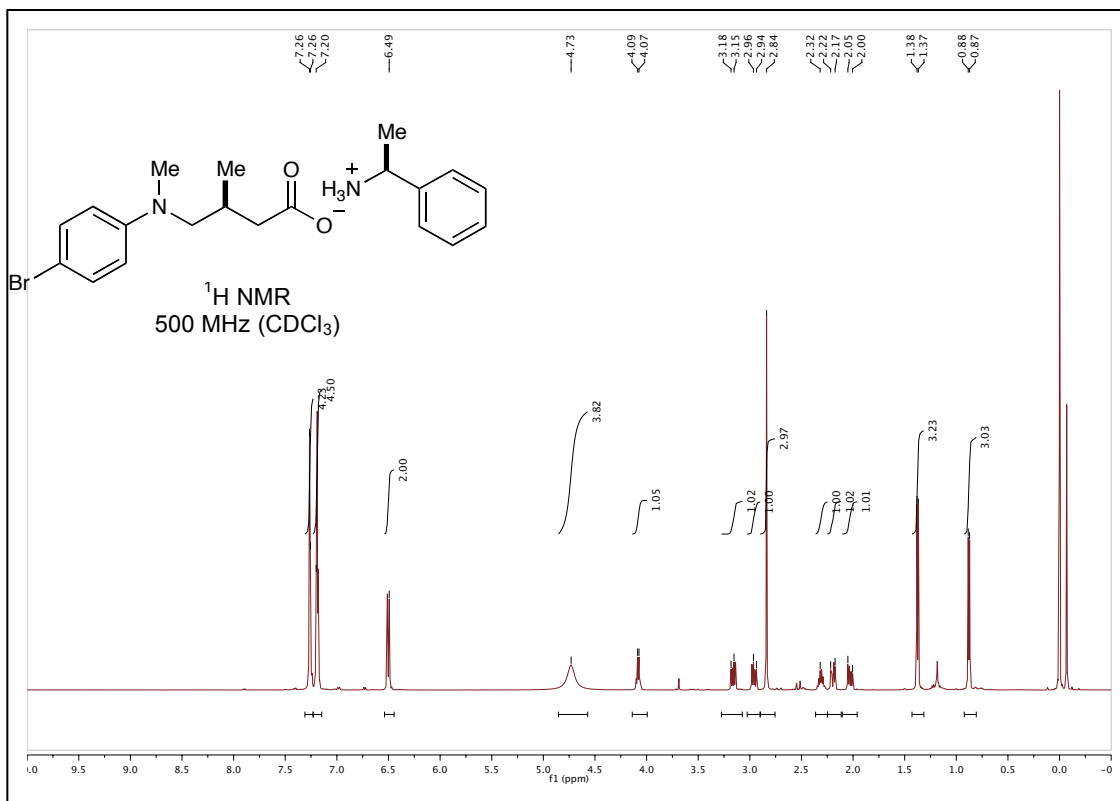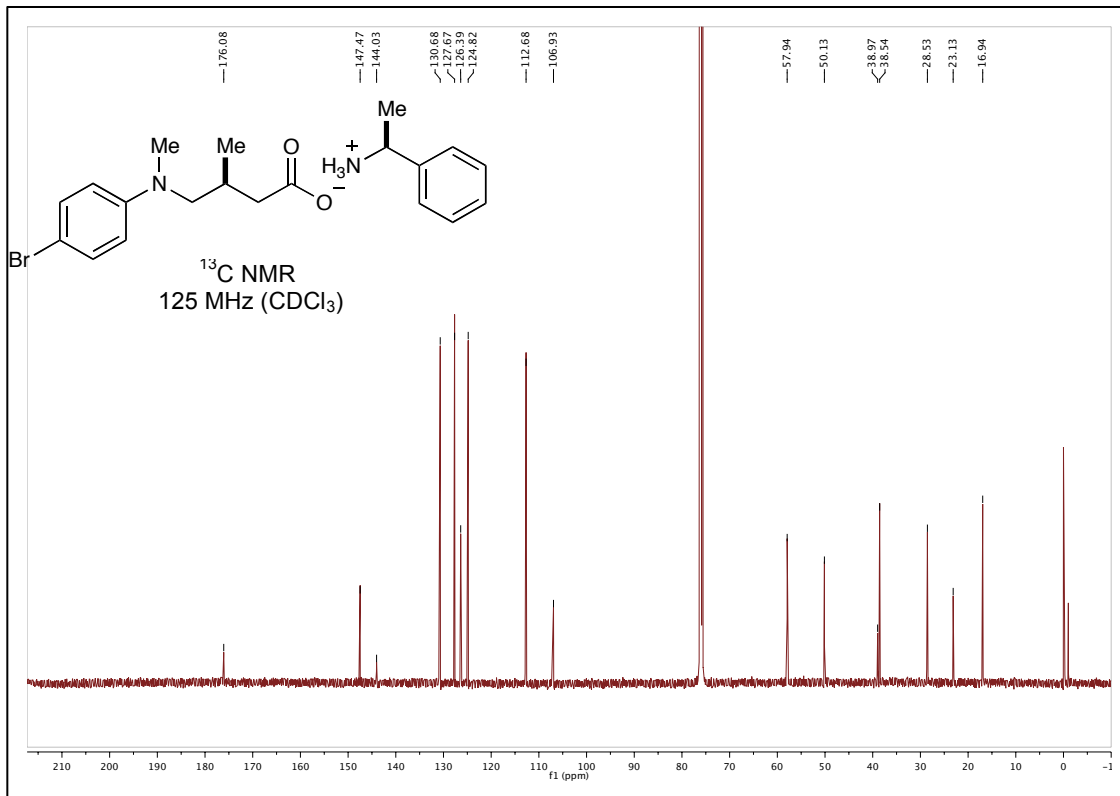

### VIII. SFC Traces

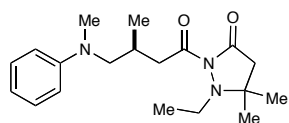

**(S)-1-ethyl-5,5-dimethyl-2-(3-methyl-4-(methyl(phenyl)amino)butanoyl)pyrazolidin-3-one**  
(Table 2, entry 1)

**Racemic:** SFC, Chiracel OD-H, 8% MeOH/CO<sub>2</sub>, 3 mL/min, 249 nm

| peak  | % area | area       | RT (min) | height (mV) |
|-------|--------|------------|----------|-------------|
| 1     | 49.256 | 10143.0713 | 6.33     | 508.9341    |
| 2     | 50.744 | 10449.4973 | 7.12     | 430.4294    |
| Total | 100    | 20592.5686 |          |             |

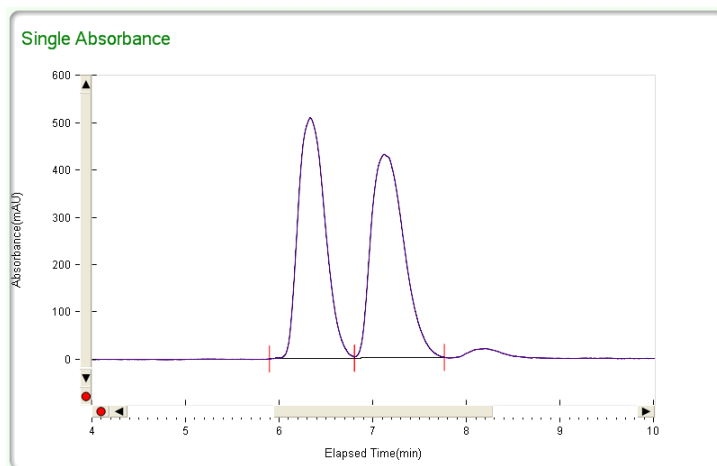

**Scalemic:** SFC, Chiracel OD-H, 8% MeOH/CO<sub>2</sub>, 3 mL/min, 249 nm

| peak  | % area  | area      | RT (min) | height (mV) |
|-------|---------|-----------|----------|-------------|
| 1     | 3.4782  | 228.0808  | 5.75     | 13.4634     |
| 2     | 96.5218 | 6329.4161 | 6.49     | 301.138     |
| Total | 100     | 6557.4969 |          |             |

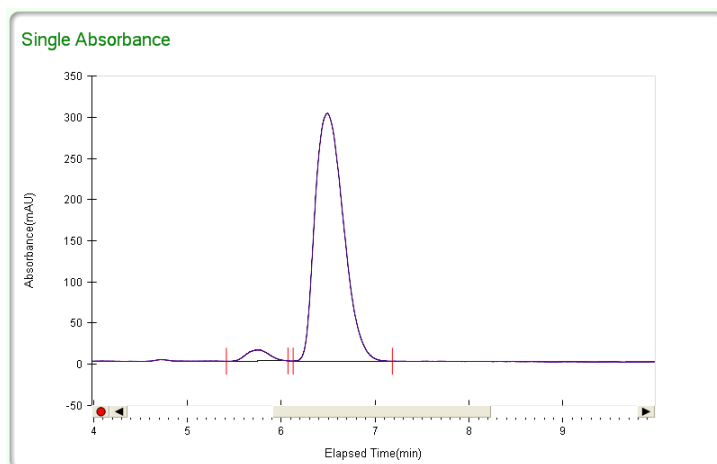

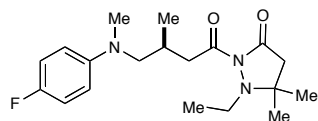

**(S)-1-ethyl-2-(4-((4-fluorophenyl)(methyl)amino)-3-methylbutanoyl)-5,5-dimethylpyrazolidin-3-one**  
(Table 2, entry 2)

**Racemic:** SFC, Chiracel AD-H, 5 to 50% MeOH/CO<sub>2</sub>, 3 mL/min, 249 nm

| peak  | % area | area       | RT (min) | height (mV) |
|-------|--------|------------|----------|-------------|
| 1     | 47.265 | 11099.7149 | 3.34     | 1304.5357   |
| 2     | 52.735 | 12384.2808 | 3.58     | 1467.2547   |
| Total | 100    | 23483.9956 |          |             |

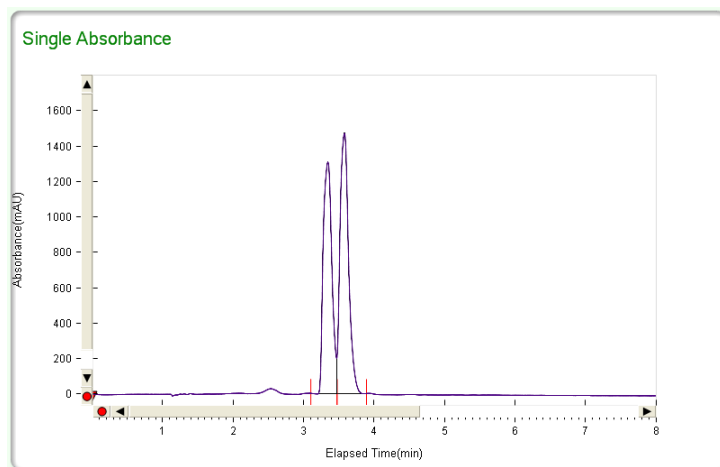

**Scalemic:** SFC, Chiracel AD-H, 5 to 50% MeOH/CO<sub>2</sub>, 3 mL/min, 249 nm

| peak  | % area  | area       | RT (min) | height (mV) |
|-------|---------|------------|----------|-------------|
| 1     | 3.3882  | 454.2170   | 3.34     | 59.2667     |
| 2     | 96.6118 | 12951.7187 | 3.56     | 1571.3618   |
| Total | 100     | 13405.9357 |          |             |

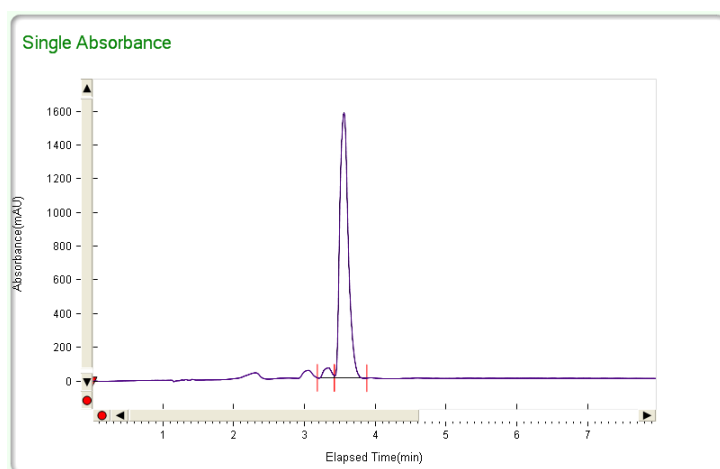

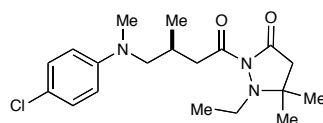

**(S)-2-(4-((4-chlorophenyl)(methyl)amino)-3-methylbutanoyl)-1-ethyl-5,5-dimethylpyrazolidin-3-one**  
(Table 2, entry 3)

**Racemic:** SFC, Chiracel AD-H, 5 to 50% MeOH/CO<sub>2</sub>, 3 mL/min, 249 nm

| peak  | % area  | area       | RT (min) | height (mV) |
|-------|---------|------------|----------|-------------|
| 1     | 49.0277 | 17259.4213 | 4.39     | 2313.6117   |
| 2     | 50.9723 | 17943.9865 | 4.74     | 2324.8204   |
| Total | 100     | 35203.4078 |          |             |

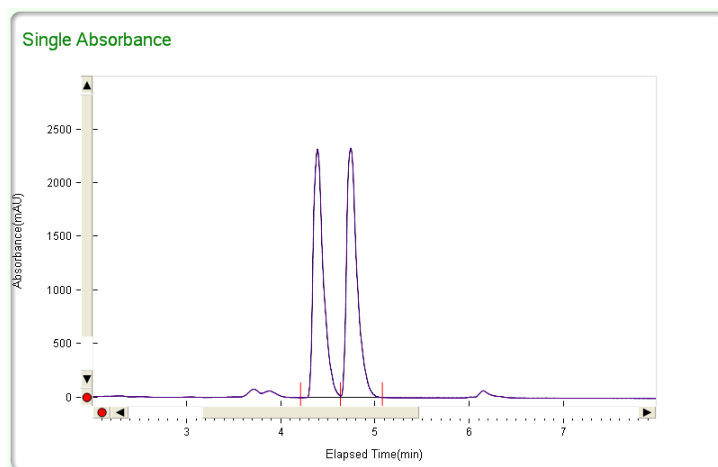

**Scalemic:** SFC, Chiracel AD-H, 5 to 50% MeOH/CO<sub>2</sub>, 3 mL/min, 249 nm

| peak  | % area  | area       | RT (min) | height (mV) |
|-------|---------|------------|----------|-------------|
| 1     | 3.4557  | 1071.6016  | 4.41     | 163.1213    |
| 2     | 96.5443 | 29937.9552 | 4.75     | 3148.0144   |
| Total | 100     | 31009.5568 |          |             |

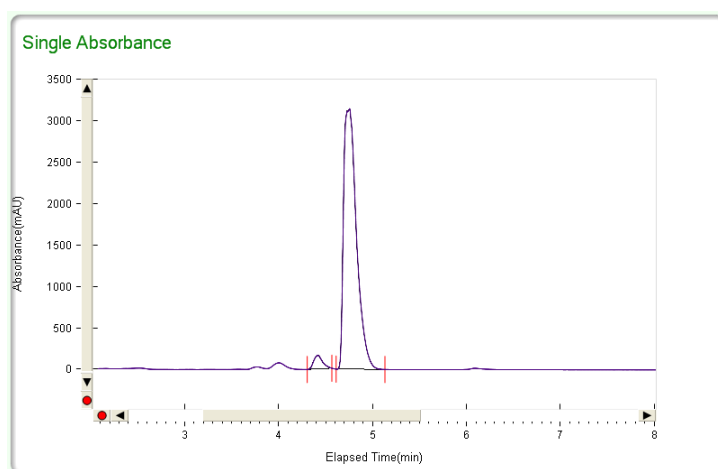

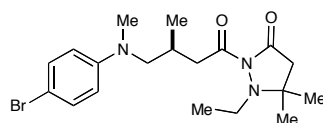

**(S)-2-(4-((4-bromophenyl)(methyl)amino)-3-methylbutanoyl)-1-ethyl-5,5-dimethylpyrazolidin-3-one**  
(Table 2, entry 4)

**Racemic:** SFC, Chiralcel AD-H, 12% MeOH/CO<sub>2</sub>, 3 mL/min, 249 nm

| peak  | % area  | area       | RT (min) | height (mV) |
|-------|---------|------------|----------|-------------|
| 1     | 48.0217 | 20620.8468 | 4.42     | 1514.1716   |
| 2     | 51.9783 | 22319.8349 | 5.09     | 1415.8950   |
| Total | 100     | 42940.6817 |          |             |

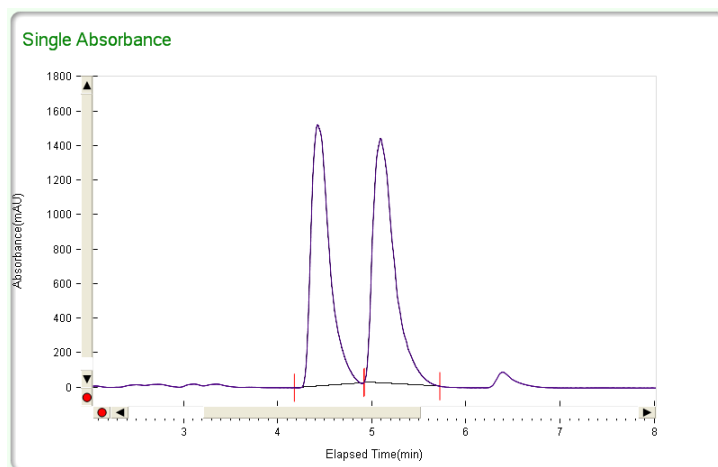

**Scalemic:** SFC, Chiralcel AD-H, 12% MeOH/CO<sub>2</sub>, 3 mL/min, 249 nm

| peak  | % area  | area      | RT (min) | height (mV) |
|-------|---------|-----------|----------|-------------|
| 1     | 3.3717  | 318.4937  | 4.5      | 26.9311     |
| 2     | 51.9783 | 9127.534  | 5.16     | 590.4464    |
| Total | 100     | 9446.0277 |          |             |

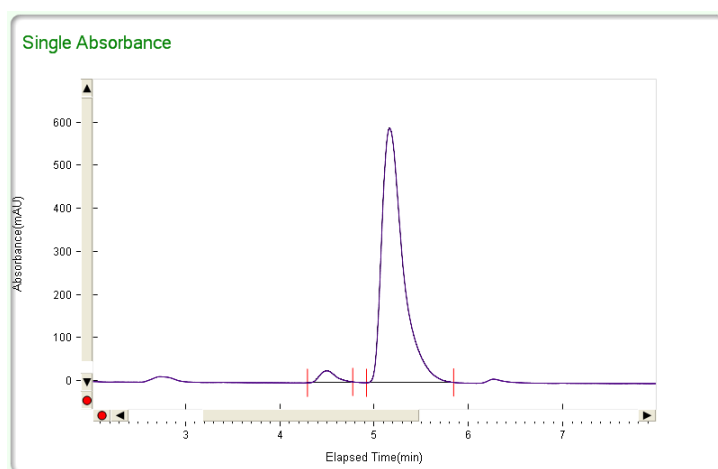

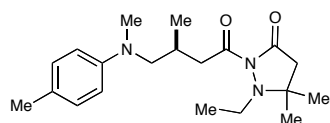

**(S)-1-ethyl-5,5-dimethyl-2-(3-methyl-4-(methyl(p-tolyl)amino)butanoyl)pyrazolidin-3-one**  
(Table 2, entry 5)

**Racemic:** SFC, Chiracel AD-H, 5 to 50% *i*-PrOH/CO<sub>2</sub>, 3 mL/min, 249 nm

| peak  | % area  | area       | RT (min) | height (mV) |
|-------|---------|------------|----------|-------------|
| 1     | 50.7422 | 6346.3218  | 4.45     | 763.857     |
| 2     | 49.2578 | 6209.2164  | 4.99     | 721.5931    |
| Total | 100     | 12605.5381 |          |             |

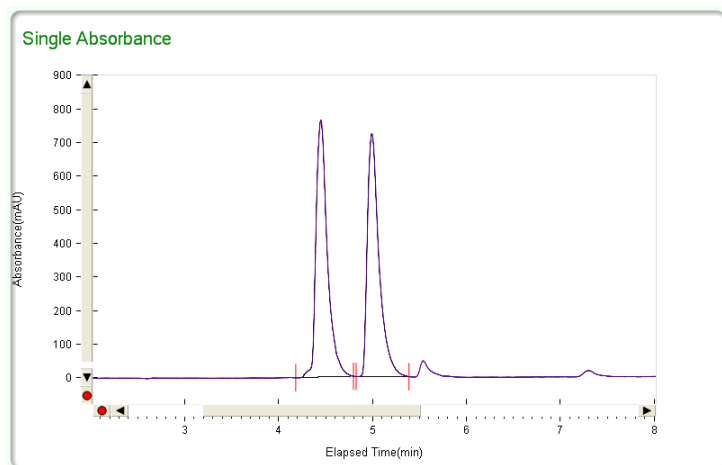

**Scalemic:** SFC, Chiracel AD-H, 5 to 50% *i*-PrOH/CO<sub>2</sub>, 3 mL/min, 249 nm

| peak  | % area  | area       | RT (min) | height (mV) |
|-------|---------|------------|----------|-------------|
| 1     | 5.4095  | 1425.4502  | 4.65     | 193.5395    |
| 2     | 94.5905 | 24925.3698 | 5.09     | 2671.2094   |
| Total | 100     | 26350.82   |          |             |

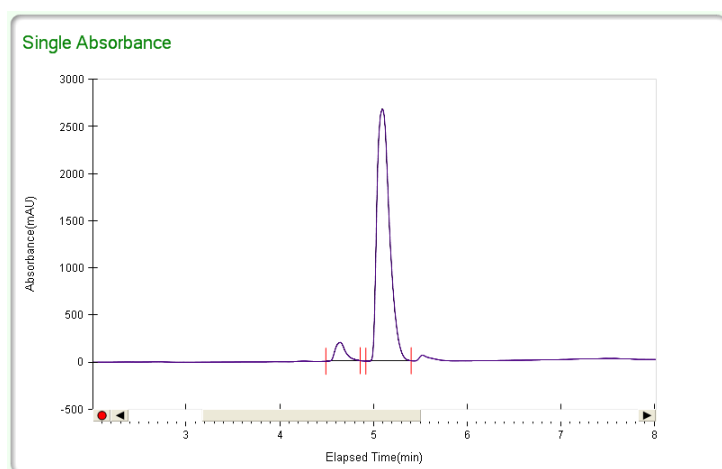

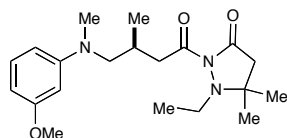

**(S)-1-ethyl-2-(4-((3-methoxyphenyl)(methyl)amino)-3-methylbutanoyl)-5,5-dimethylpyrazolidin-3-one**  
(Table 2, entry 7)

**Racemic:** SFC, Chiracel OD-H, 5 to 50% MeOH/CO<sub>2</sub>, 3 mL/min, 249 nm

| peak  | % area  | area       | RT (min) | height (mV) |
|-------|---------|------------|----------|-------------|
| 1     | 50.8908 | 10277.5731 | 5.36     | 1696.7083   |
| 2     | 49.1092 | 9917.7745  | 5.73     | 1578.3648   |
| Total | 100     | 20195.3476 |          |             |

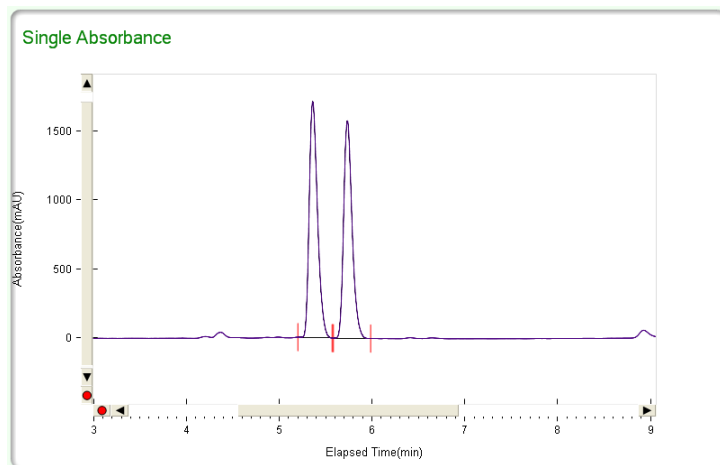

**Scalemic:** SFC, Chiracel OD-H, 5 to 50% MeOH/CO<sub>2</sub>, 3 mL/min, 249 nm

| peak  | % area | area      | RT (min) | height (mV) |
|-------|--------|-----------|----------|-------------|
| 1     | 95.986 | 3420.6893 | 5.33     | 578.7093    |
| 2     | 4.014  | 143.05    | 5.73     | 25.2032     |
| Total | 100    | 3563.7394 |          |             |

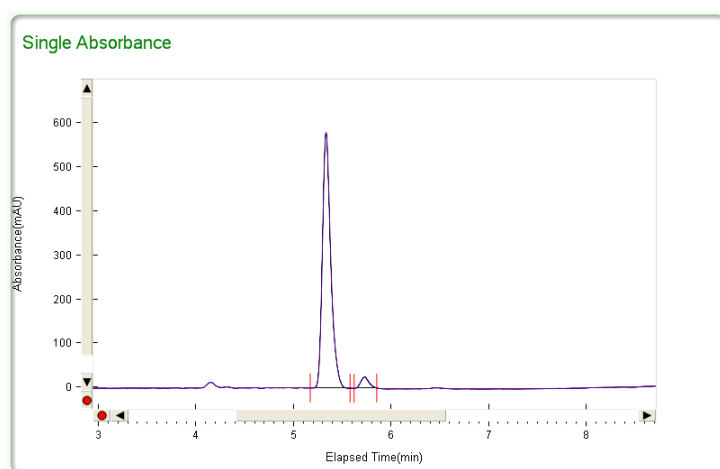

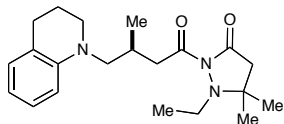

**(S)-2-(4-(3,4-dihydroquinolin-1(2H)-yl)-3-methylbutanoyl)-1-ethyl-5,5-dimethylpyrazolidin-3-one**  
(Table 2, entry 9)

**Racemic:** SFC, Chiracel AD-H, 5 to 50% *i*-PrOH/CO<sub>2</sub>, 3 mL/min, 249 nm

| peak  | % area  | area       | RT (min) | height (mV) |
|-------|---------|------------|----------|-------------|
| 1     | 51.9556 | 6381.6846  | 5.14     | 942.0845    |
| 2     | 48.0444 | 5901.2782  | 5.38     | 807.5846    |
| Total | 100     | 12282.9628 |          |             |

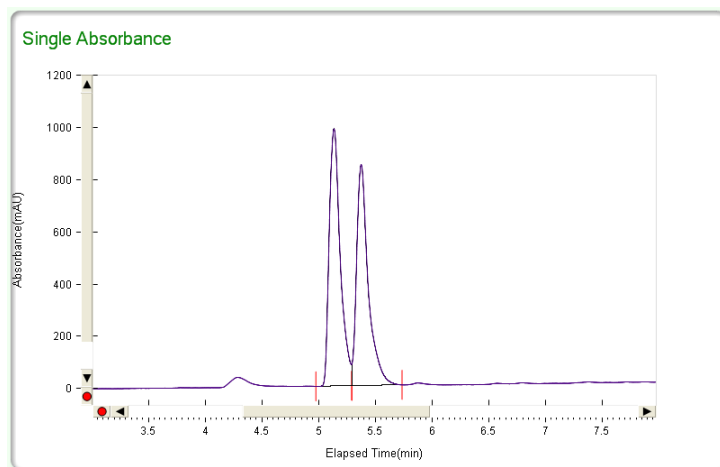

**Scalemic:** SFC, Chiracel AD-H, 5 to 50% *i*-PrOH/CO<sub>2</sub>, 3 mL/min, 249 nm

| peak  | % area  | area      | RT (min) | height (mV) |
|-------|---------|-----------|----------|-------------|
| 1     | 4.8502  | 337.2443  | 5.12     | 55.7599     |
| 2     | 95.1498 | 6615.9126 | 5.37     | 934.2393    |
| Total | 100     | 6953.1569 |          |             |

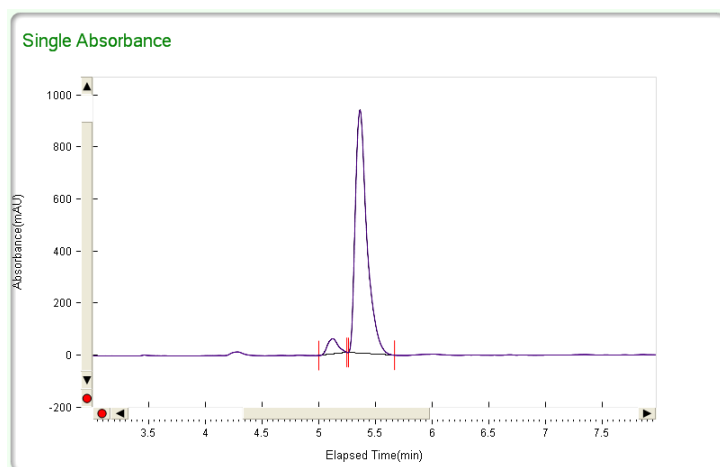



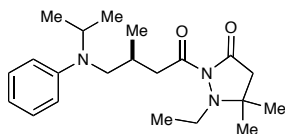

**(S)-1-ethyl-2-(4-(isopropyl(phenyl)amino)-3-methylbutanoyl)-5,5-dimethylpyrazolidin-3-one**  
(Table 2, entry 13)

**Racemic:** SFC, Chiracel AD-H, 10% MeOH/CO<sub>2</sub>, 3 mL/min, 236 nm

| peak  | % area  | area      | RT (min) | height (mV) |
|-------|---------|-----------|----------|-------------|
| 1     | 49.9858 | 440.9966  | 5.1      | 37.5691     |
| 2     | 50.0142 | 441.2472  | 5.57     | 34.8653     |
| Total | 100     | 882.24386 |          |             |

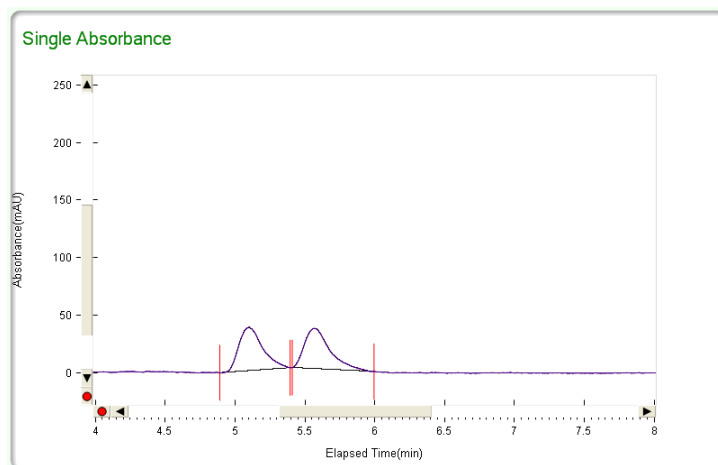

**Scalemic:** SFC, Chiracel AD-H, 10% MeOH/CO<sub>2</sub>, 3 mL/min, 236 nm

| peak  | % area | area      | RT (min) | height (mV) |
|-------|--------|-----------|----------|-------------|
| 1     | 97.445 | 1072.8867 | 5.09     | 86.835      |
| 2     | 2.555  | 28.1307   | 5.53     | 3.1001      |
| Total | 100    | 1101.0174 |          |             |

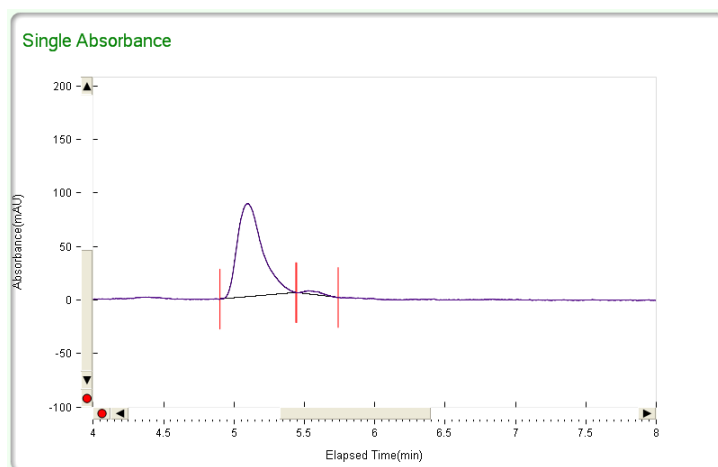

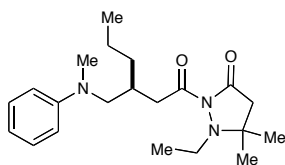

**(S)-1-ethyl-5,5-dimethyl-2-(3-((methyl(phenyl)amino)methyl)hexanoyl)pyrazolidin-3-one**  
(Table 3, entry 1)

**Racemic:** SFC, Chiracel AD-H, 5 to 50% MeOH/CO<sub>2</sub>, 3 mL/min, 249 nm

| peak  | % area  | area      | RT (min) | height (mV) |
|-------|---------|-----------|----------|-------------|
| 1     | 50.7163 | 4879.6126 | 3.20 min | 527.0616    |
| 2     | 49.2837 | 4741.781  | 3.53 min | 546.7968    |
| Total | 100     | 9621.3936 |          |             |

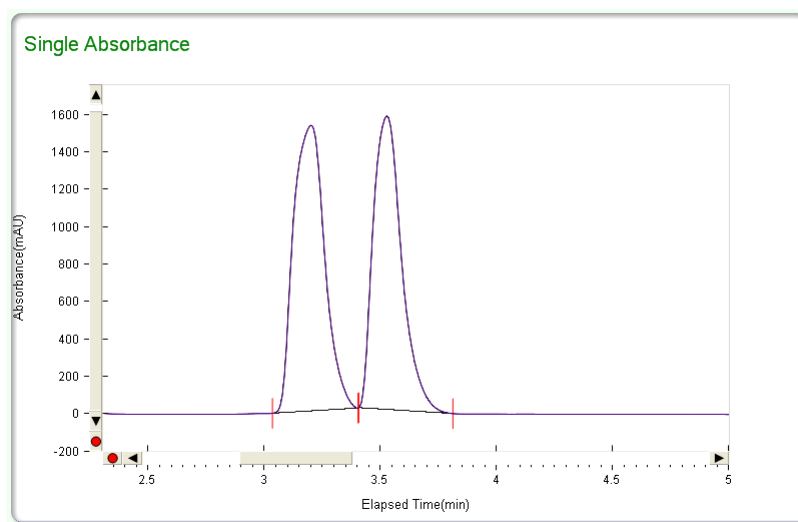

**Scalemic:** SFC, Chiracel AD-H, 5 to 50% MeOH/CO<sub>2</sub>, 3 mL/min, 249 nm

| peak  | % area  | area      | RT (min) | height (mV) |
|-------|---------|-----------|----------|-------------|
| 1     | 3.6500  | 89.8125   | 3.20 min | 10.2960     |
| 2     | 96.3500 | 2370.8343 | 3.53 min | 277.8255    |
| Total | 100     | 2460.6467 |          |             |

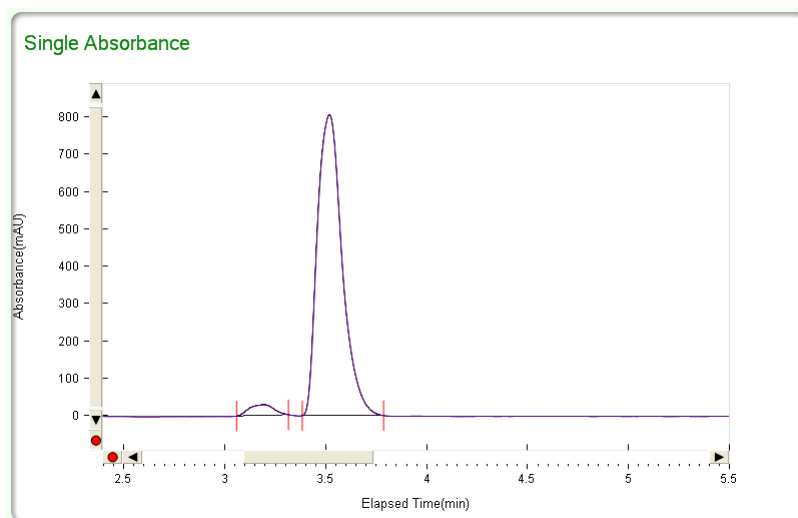

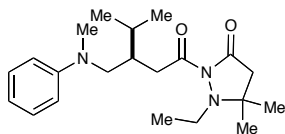

**(R)-1-ethyl-5,5-dimethyl-2-(4-methyl-3-((methyl(phenyl)amino)methyl)pentanoyl)pyrazolidin-3-one**  
(Table 3, entry 2)

**Racemic:** SFC, Chiracel AD-H, 5 to 50% MeOH/CO<sub>2</sub>, 3 mL/min, 249 nm

| peak  | % area  | area      | RT (min) | height (mV) |
|-------|---------|-----------|----------|-------------|
| 1     | 50.8580 | 1636.3725 | 2.93 min | 155.7033    |
| 2     | 49.1420 | 1581.1571 | 3.31 min | 172.9655    |
| Total | 100     | 3217.5295 |          |             |

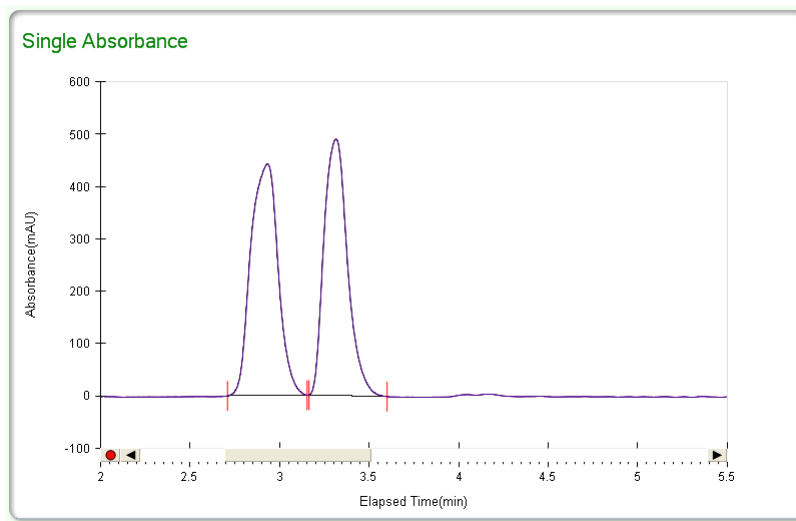

**Scalemic:** SFC, Chiracel AD-H, 5 to 50% MeOH/CO<sub>2</sub>, 3 mL/min, 249 nm

| peak  | % area | area      | RT (min) | height (mV) |
|-------|--------|-----------|----------|-------------|
| 1     | 3.6070 | 167.7042  | 2.91 min | 16.2200     |
| 2     | 96.393 | 4481.7273 | 3.32 min | 515.2296    |
| Total | 100    | 4649.4314 |          |             |

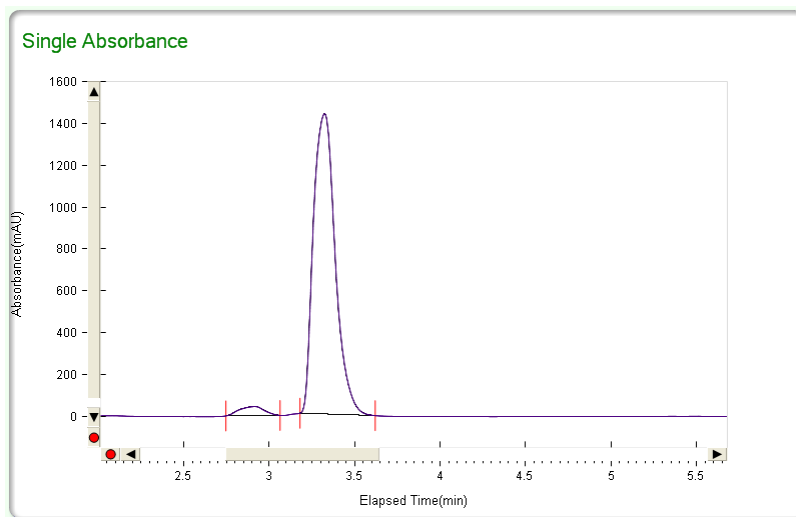

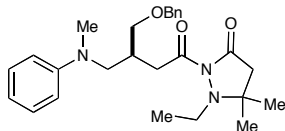

**(S)-2-(4-(benzyloxy)-3-((methyl(phenyl)amino)methyl)butanoyl)-1-ethyl-5,5-dimethylpyrazolidin-3-one**  
(Table 3, entry 3)

**Racemic:** SFC, Chiracel AD-H, 5 to 50% *i*-PrOH /CO<sub>2</sub>, 3 mL/min, 249 nm

| peak  | % area  | area      | RT (min) | height (mV) |
|-------|---------|-----------|----------|-------------|
| 1     | 50.4594 | 4373.3147 | 6.40 min | 545.9539    |
| 2     | 49.5406 | 4293.6861 | 8.42 min | 489.6286    |
| Total | 100     | 8667.0008 |          |             |

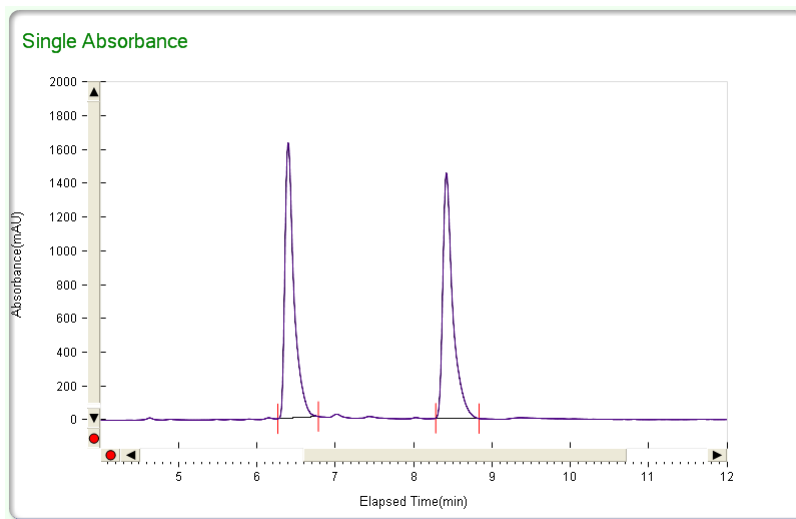

**Scalemic:** SFC, Chiracel AD-H, 5 to 50% *i*-PrOH /CO<sub>2</sub>, 3 mL/min, 249 nm

| peak  | % area  | area      | RT (min) | height (mV) |
|-------|---------|-----------|----------|-------------|
| 1     | 4.7919  | 216.8380  | 6.39 min | 28.3508     |
| 2     | 95.2081 | 4308.2817 | 8.45 min | 514.9895    |
| Total | 100     | 4525.1197 |          |             |

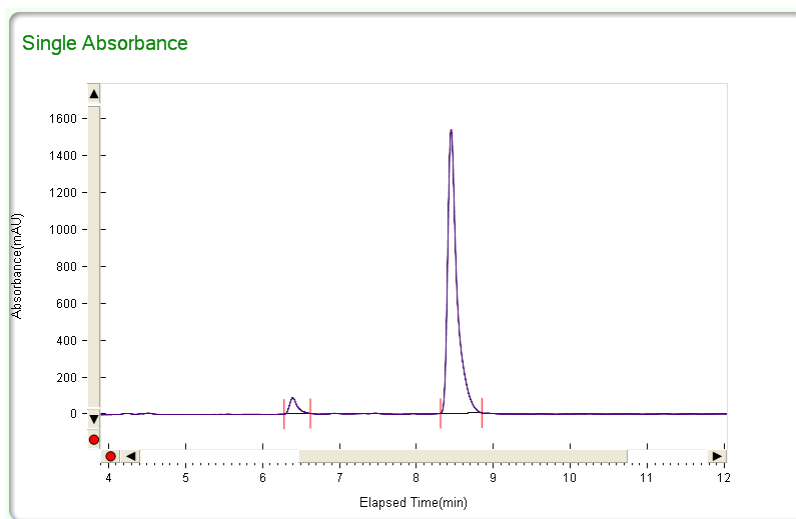

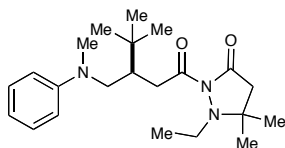

**(R)-2-(4,4-dimethyl-3-((methyl(phenyl)amino)methyl)pentanoyl)-1-ethyl-5,5-dimethylpyrazolidin-3-one**  
(Table 3, entry 4)

**Racemic:** SFC, Chiracel AD-H, 3% MeOH/CO<sub>2</sub>, 3 mL/min, 249 nm

| peak  | % area  | area      | RT (min) | height (mV) |
|-------|---------|-----------|----------|-------------|
| 1     | 46.6334 | 930.2134  | 4.25 min | 24.8752     |
| 2     | 53.3666 | 1064.523  | 5.54 min | 23.0197     |
| Total | 100     | 1994.7364 |          |             |

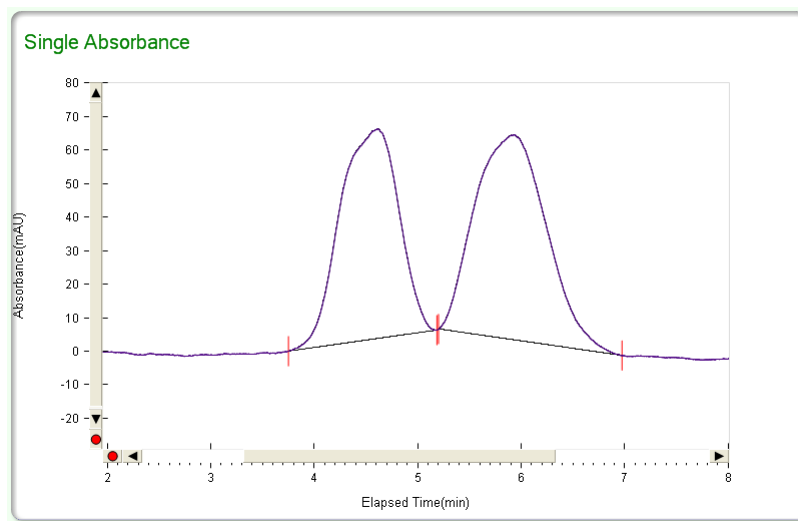

**Scalemic:** SFC, Chiracel AD-H, 5 to 50% MeOH/CO<sub>2</sub>, 3 mL/min, 249 nm

| peak  | % area  | area       | RT (min) | height (mV) |
|-------|---------|------------|----------|-------------|
| 1     | 2.2599  | 613.1346   | 4.33 min | 18.4249     |
| 2     | 97.7401 | 26517.8668 | 5.61 min | 439.063     |
| Total | 100     | 27131.0013 |          |             |

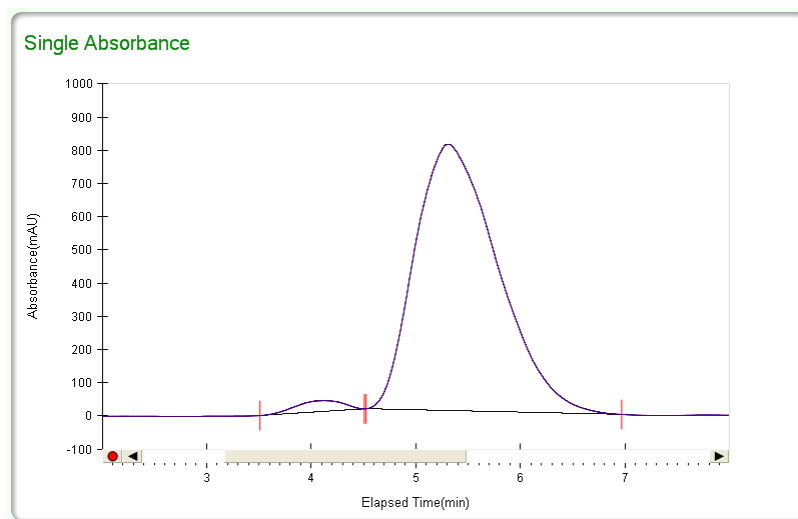

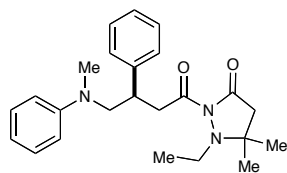

**(R)-1-ethyl-5,5-dimethyl-2-(4-(methyl(phenyl)amino)-3-phenylbutanoyl)pyrazolidin-3-one**  
(Table 3, entry 5)

**Racemic:** SFC, Chiracel AD-H, 5 to 50% MeOH/CO<sub>2</sub>, 3 mL/min, 249 nm

| peak  | % area  | area       | RT (min) | height (mV) |
|-------|---------|------------|----------|-------------|
| 1     | 47.6477 | 10889.5762 | 4.40 min | 1429.5604   |
| 2     | 52.3523 | 11964.7876 | 5.45 min | 1437.086    |
| Total | 100     | 22854.3638 |          |             |

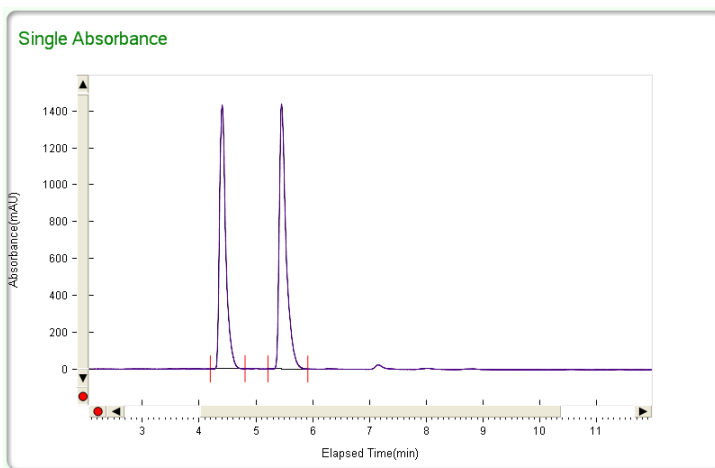

**Scalemic:** SFC, Chiracel AD-H, 5 to 50% MeOH/CO<sub>2</sub>, 3 mL/min, 249 nm

| peak  | % area  | area       | RT (min) | height (mV) |
|-------|---------|------------|----------|-------------|
| 1     | 3.8739  | 23882.5624 | 4.46 min | 125.5653    |
| 2     | 96.1261 | 23882.5624 | 5.39 min | 2594.4194   |
| Total | 100     | 24845.0259 |          |             |

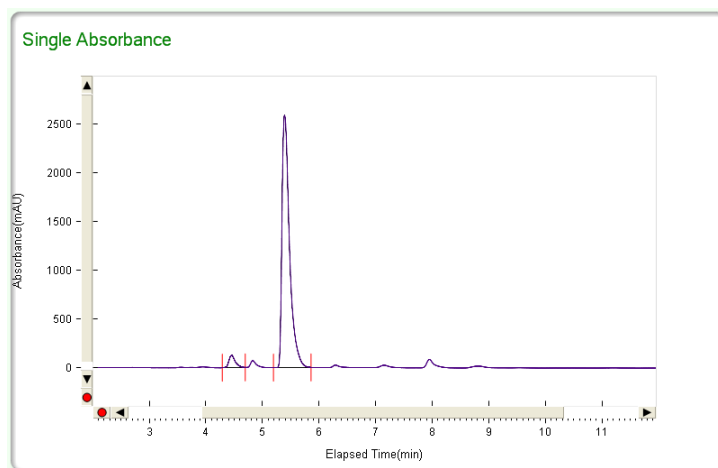

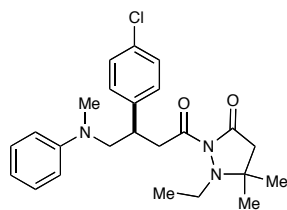

**(R)-2-(3-(4-chlorophenyl)-4-(methyl(phenyl)amino)butanoyl)-1-ethyl-5,5-dimethylpyrazolidin-3-one**  
(Table 3, entry 6)

**Racemic:** SFC, Chiracel AD-H, 5 to 50% *i*-PrOH/CO<sub>2</sub>, 3 mL/min, 249 nm

| peak  | % area  | area       | RT (min) | height (mV) |
|-------|---------|------------|----------|-------------|
| 1     | 49.1522 | 16353.2013 | 6.52 min | 2205.4375   |
| 2     | 50.8478 | 16917.3027 | 7.94 min | 1870.9806   |
| Total | 100     | 33270.504  |          |             |

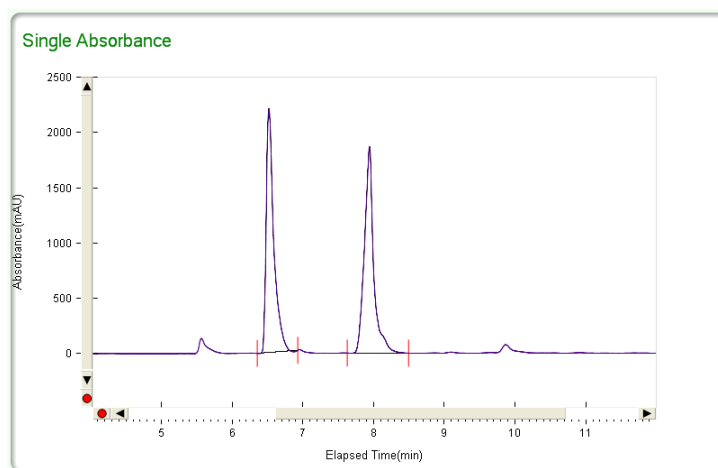

**Scalemic:** SFC, Chiracel AD-H, 5 to 50% *i*-PrOH/CO<sub>2</sub>, 3 mL/min, 249 nm

| peak  | % area  | area      | RT (min) | height (mV) |
|-------|---------|-----------|----------|-------------|
| 1     | 5.0012  | 428.3304  | 6.39 min | 63.6496     |
| 2     | 94.9988 | 8136.2905 | 7.88 min | 950.2956    |
| Total | 100     | 8564.6209 |          |             |

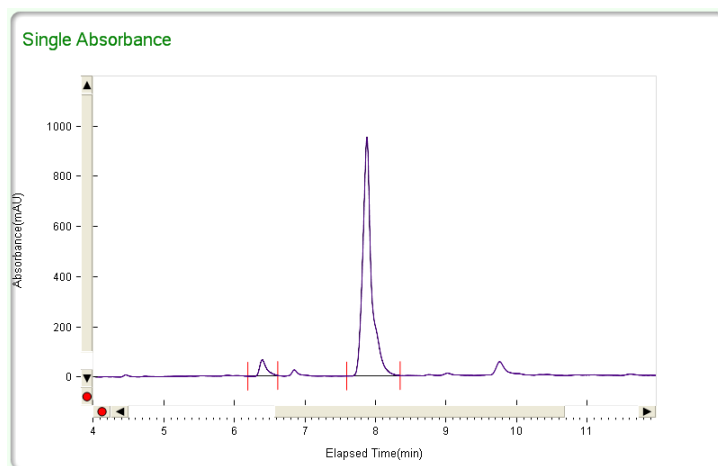

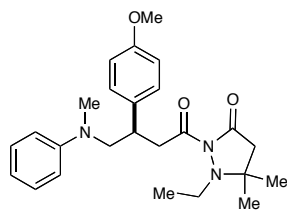

**(R)-1-ethyl-2-(3-(4-methoxyphenyl)-4-(methyl(phenyl)amino)butanoyl)-5,5-dimethylpyrazolidin-3-one**  
(Table 3, entry 7)

**Racemic:** SFC, Chiracel AD-H, 5 to 50% MeOH/CO<sub>2</sub>, 3 mL/min, 249 nm

| peak  | % area  | area       | RT (min) | height (mV) |
|-------|---------|------------|----------|-------------|
| 1     | 48.9206 | 10571.3389 | 5.3 min  | 919.6501    |
| 2     | 51.0794 | 11037.8302 | 6.15 min | 1043.9818   |
| Total | 100     | 21609.1691 |          |             |

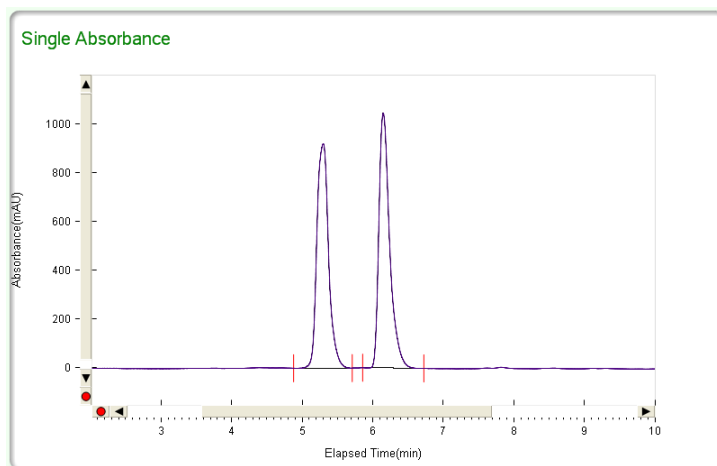

**Scalemic:** SFC, Chiracel AD-H, 5 to 50% MeOH/CO<sub>2</sub>, 3 mL/min, 249 nm

| peak  | % area  | area       | RT (min) | height (mV) |
|-------|---------|------------|----------|-------------|
| 1     | 3.4078  | 459.5595   | 5.26 min | 69.2989     |
| 2     | 96.5922 | 13026.0484 | 6.11 min | 1414.0359   |
| Total | 100     | 13485.6079 |          |             |

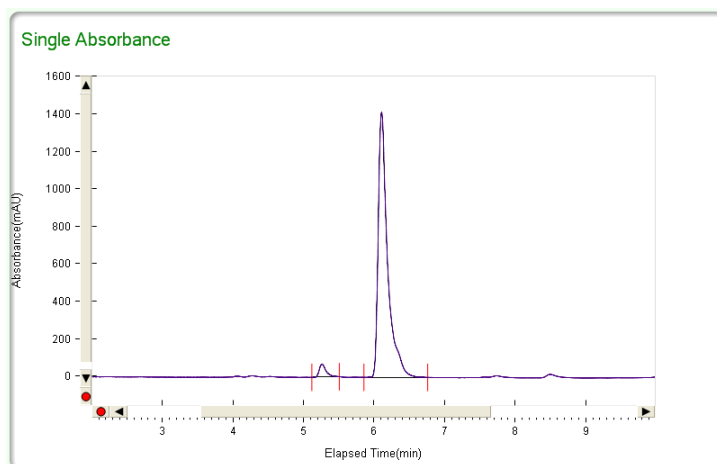



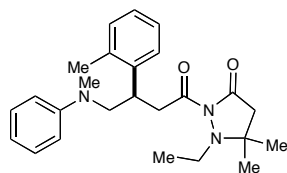

**(R)-1-ethyl-5,5-dimethyl-2-(4-(methyl(phenyl)amino)-3-(o-tolyl)butanoyl)pyrazolidin-3-one**  
(Table 3, entry 8)

**Racemic:** SFC, Chiracel OD-H, 5 to 50% MeOH/CO<sub>2</sub>, 3 mL/min, 249 nm

| peak  | % area | area       | RT (min) | height (mV) |
|-------|--------|------------|----------|-------------|
| 1     | 50.171 | 26671.4925 | 5.36 min | 2828.0754   |
| 2     | 49.829 | 26489.6366 | 5.84 min | 2814.1501   |
| Total | 100    | 53161.1292 |          |             |

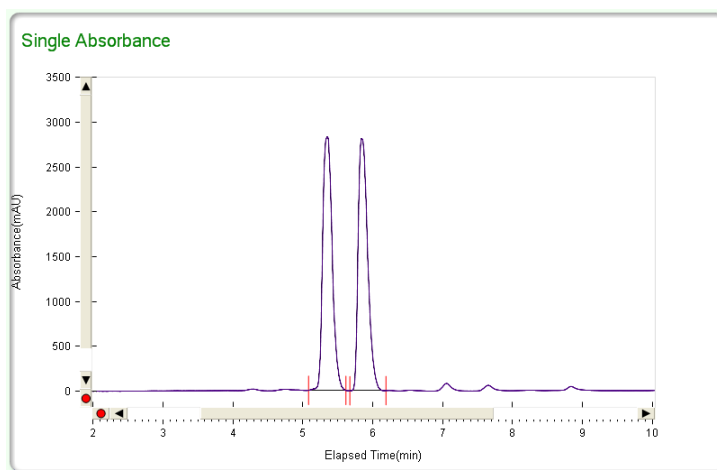

**Scalemic:** SFC, Chiracel OD-H, 5 to 50% MeOH/CO<sub>2</sub>, 3 mL/min, 249 nm

| peak  | % area | area       | RT (min) | height (mV) |
|-------|--------|------------|----------|-------------|
| 1     | 7.448  | 1648.8362  | 5.54 min | 240.5873    |
| 2     | 92.552 | 20488.9988 | 6.01 min | 2606.2135   |
| Total | 100    | 22137.835  |          |             |

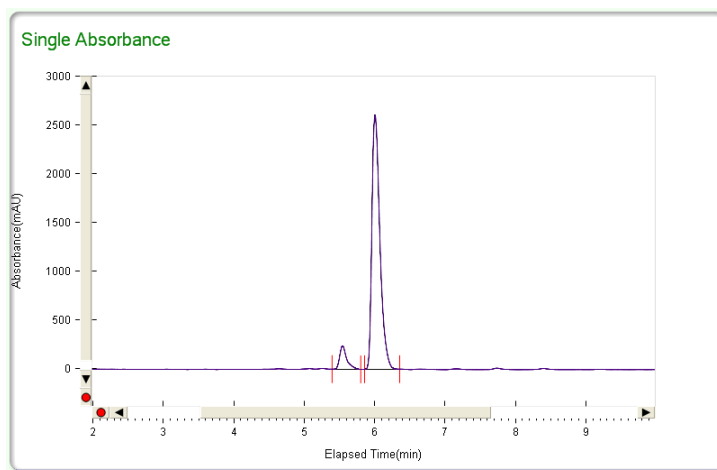

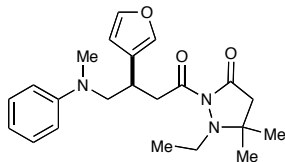

**(R)-1-ethyl-2-(3-(furan-3-yl)-4-(methyl(phenyl)amino)butanoyl)-5,5-dimethylpyrazolidin-3-one**  
(Table 3, entry 9)

**Racemic:** SFC, Chiracel AD-H, 5 to 50% MeOH/CO<sub>2</sub>, 3 mL/min, 249 nm

| peak  | % area  | area       | RT (min) | height (mV) |
|-------|---------|------------|----------|-------------|
| 1     | 49.8914 | 9560.9141  | 4.11 min | 1235.1085   |
| 2     | 50.1086 | 9602.5298  | 4.98 min | 1225.88     |
| Total | 100     | 19163.4439 |          |             |

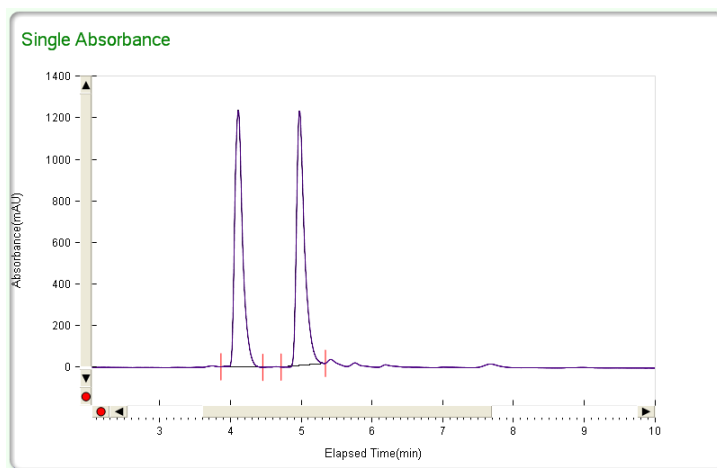

**Scalemic:** SFC, Chiracel AD-H, 5 to 50% MeOH/CO<sub>2</sub>, 3 mL/min, 249 nm

| peak  | % area  | area       | RT (min) | height (mV) |
|-------|---------|------------|----------|-------------|
| 1     | 4.8025  | 1518.7972  | 4.27 min | 96.6807     |
| 2     | 95.1975 | 30106.2993 | 5.29 min | 2496.3385   |
| Total | 100     | 31625.0965 |          |             |

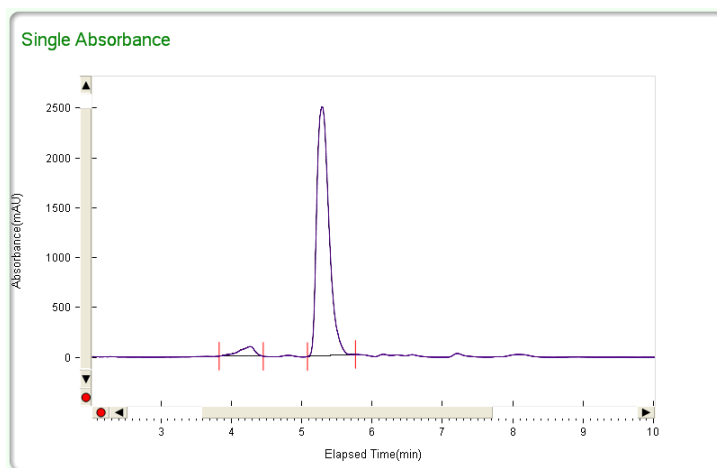

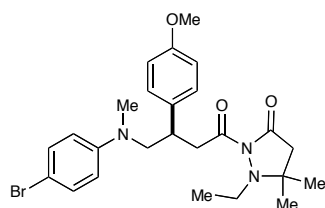

**(R)-2-(4-((4-bromophenyl)(methyl)amino)-3-(4-methoxyphenyl)butanoyl)-1-ethyl-5,5-dimethylpyrazolidin-3-one**

**Racemic:** SFC, Chiracel OJ-H, 5 to 50% MeOH/CO<sub>2</sub>, 3 mL/min, 249 nm

| peak  | % area  | area       | RT (min) | height (mV) |
|-------|---------|------------|----------|-------------|
| 1     | 50.8407 | 5203.5567  | 6.40 min | 772.8044    |
| 2     | 49.1593 | 5031.4597  | 6.88 min | 717.1919    |
| Total | 100     | 10235.0164 |          |             |

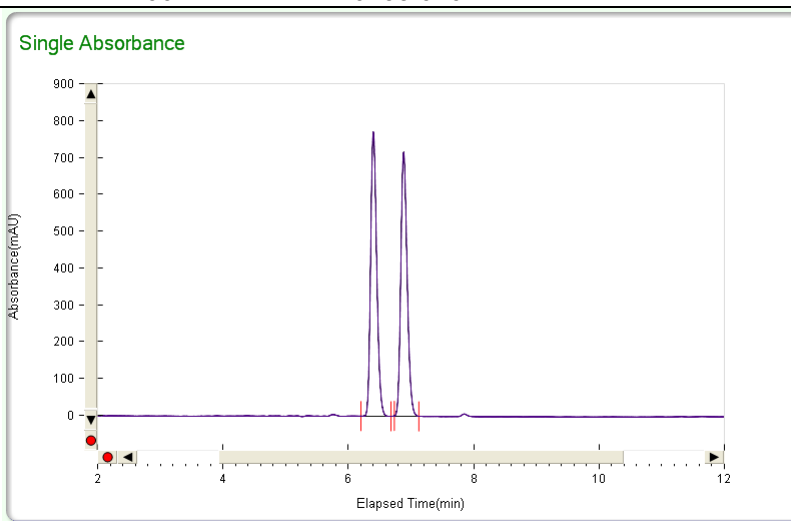

**Scalemic:** SFC, Chiracel OJ-H, 5 to 50% MeOH/CO<sub>2</sub>, 3 mL/min, 249 nm

| peak  | % area  | area       | RT (min) | height (mV) |
|-------|---------|------------|----------|-------------|
| 1     | 97.1597 | 13693.4821 | 6.40 min | 1932.9375   |
| 2     | 2.8403  | 400.3000   | 6.91 min | 57.935      |
| Total | 100     | 14093.7821 |          |             |

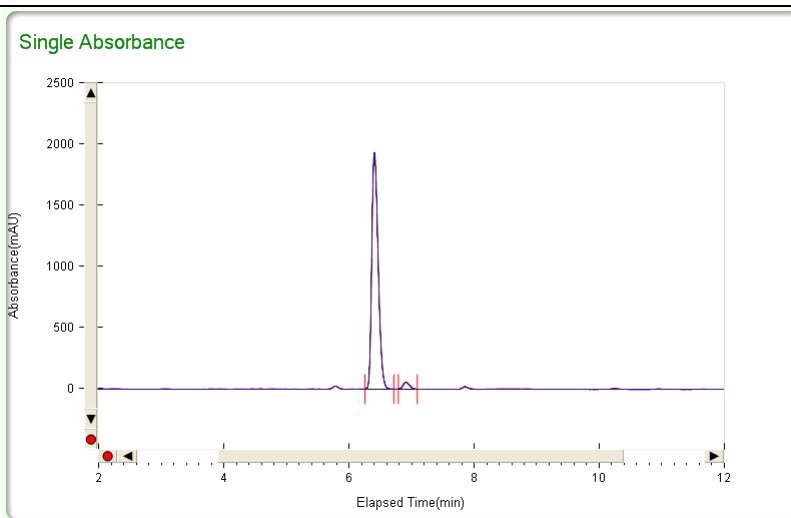

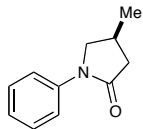

**(S)-4-methyl-1-phenylpyrrolidin-2-one**  
(Scheme 2, 10)

**Racemic:** GC, Supelco's Beta Dex 225, 140 °C for 45 min, then 5 °C/min to 180 °C

| peak  | % area   | area     | RT (min) | height (mV) |
|-------|----------|----------|----------|-------------|
| 1     | 44.90048 | 429330.3 | 49.950   | 32515.1     |
| 2     | 55.09952 | 526851.8 | 50.391   | 36479.1     |
| Total | 100      | 956182.1 |          |             |

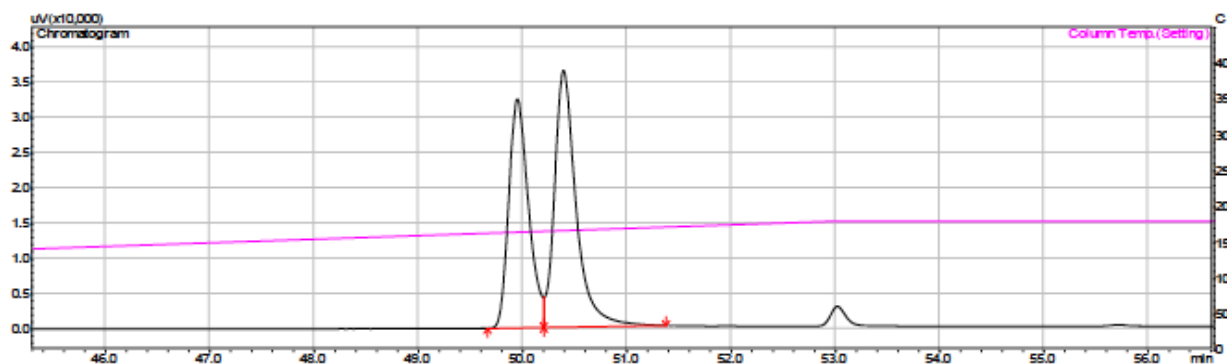

**Scalemic:** GC, Supelco's Beta Dex 225, 140 °C for 45 min, then 5 °C/min to 180 °C

| peak  | % area   | area      | RT (min) | height (mV) |
|-------|----------|-----------|----------|-------------|
| 1     | 3.72478  | 81501.0   | 49.950   | 6892.2      |
| 2     | 96.27522 | 2106571.5 | 50.311   | 152274.9    |
| Total | 100      | 2188072.5 |          |             |

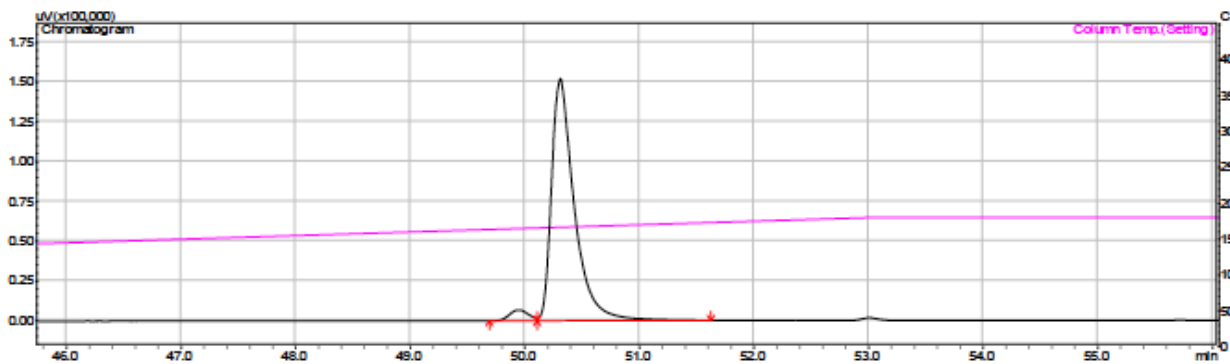

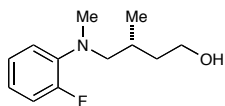

**(R)-4-((2-fluorophenyl)(methyl)amino)-3-methylbutan-1-ol**

**Racemic:** SFC, Chiracel OD-H, 3% *i*-PrOH/CO<sub>2</sub>, 5 mL/min, 249 nm

| peak  | % area  | area      | RT (min) | height (mV) |
|-------|---------|-----------|----------|-------------|
| 1     | 47.9386 | 2253.4702 | 6.28     | 68.5808     |
| 2     | 52.0614 | 2444.2724 | 7.08     | 63.7617     |
| Total | 100     | 4700.7425 |          |             |

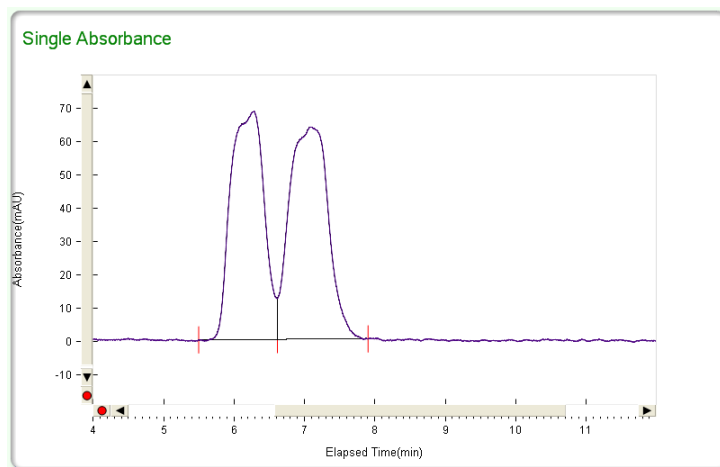

**Scalemic:** SFC, Chiracel AD-H, 5 to 50% *i*-PrOH/CO<sub>2</sub>, 3 mL/min, 249 nm

| peak  | % area  | area      | RT (min) | height (mV) |
|-------|---------|-----------|----------|-------------|
| 1     | 2.5986  | 128.3118  | 6.28     | 4.3175      |
| 2     | 97.4014 | 4809.4984 | 7.21     | 134.326     |
| Total | 100     | 4937.8102 |          |             |

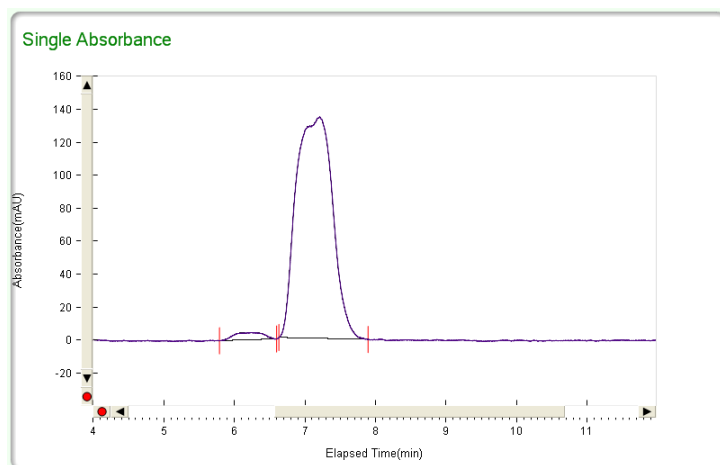

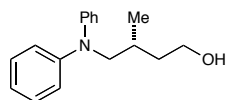

**(R)-4-(diphenylamino)-3-methylbutan-1-ol**

**Racemic:** SFC, Chiracel OJ-H, 5% *i*-PrOH/CO<sub>2</sub>, 4 mL/min, 249 nm

| peak  | % area  | area      | RT (min) | height (mV) |
|-------|---------|-----------|----------|-------------|
| 1     | 48.6215 | 4684.7542 | 8.03     | 158.5619    |
| 2     | 51.3785 | 4950.3929 | 8.83     | 147.5679    |
| Total | 100     | 9635.1471 |          |             |

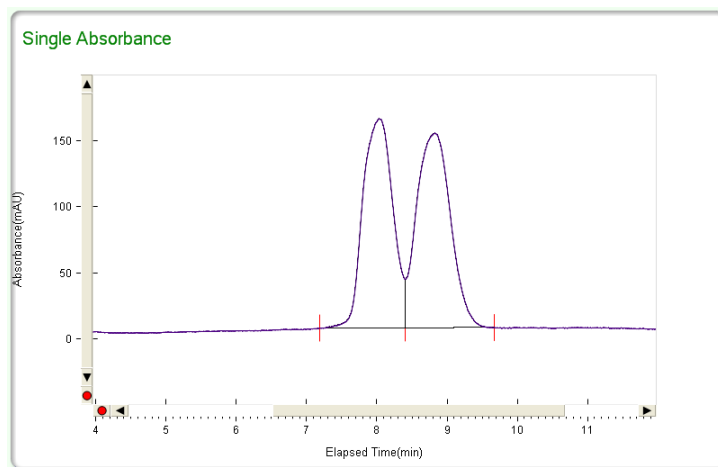

**Scalemic:** SFC, Chiracel OJ-H, 5% *i*-PrOH/CO<sub>2</sub>, 4 mL/min, 249 nm

| peak  | % area  | area      | RT (min) | height (mV) |
|-------|---------|-----------|----------|-------------|
| 1     | 3.0044  | 126.4144  | 8.47     | 4.5919      |
| 2     | 96.2393 | 4081.2393 | 9.02     | 118.3445    |
| Total | 100     | 4207.6537 |          |             |

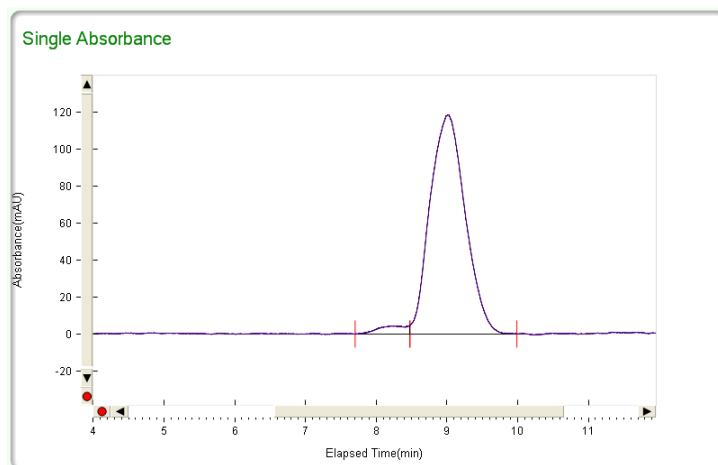

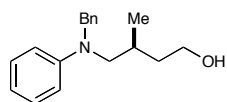

**(S)-4-(benzyl(phenyl)amino)-3-methylbutan-1-ol**

**Racemic:** SFC, Chiracel OD-H, 5% to 50% *i*-PrOH/CO<sub>2</sub>, 3 mL/min, 249 nm

| peak  | % area  | area      | RT (min) | height (mV) |
|-------|---------|-----------|----------|-------------|
| 1     | 49.3552 | 1680.7896 | 7.22     | 253.4013    |
| 2     | 50.6448 | 1724.7091 | 8.17     | 234.1595    |
| Total | 100     | 3405.4988 |          |             |

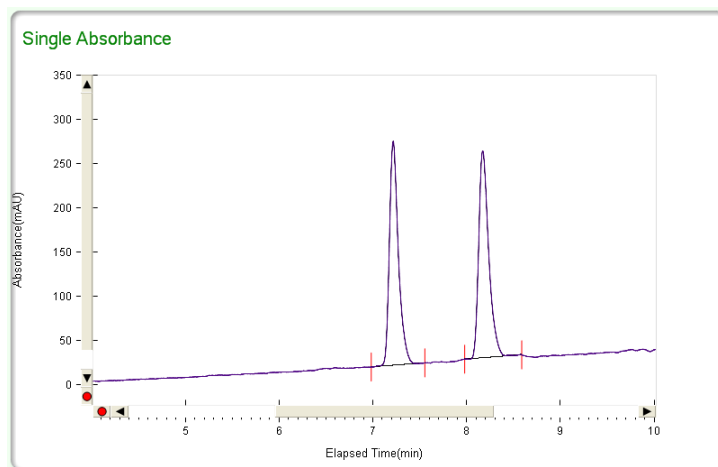

**Scalemic:** SFC, Chiracel OD-H, 5% to 50% *i*-PrOH/CO<sub>2</sub>, 3 mL/min, 249 nm

| peak  | % area  | area      | RT (min) | height (mV) |
|-------|---------|-----------|----------|-------------|
| 1     | 3.4983  | 174.1503  | 7.23     | 21.9352     |
| 2     | 96.5017 | 4804.0269 | 8.16     | 614.7831    |
| Total | 100     | 4978.1772 |          |             |

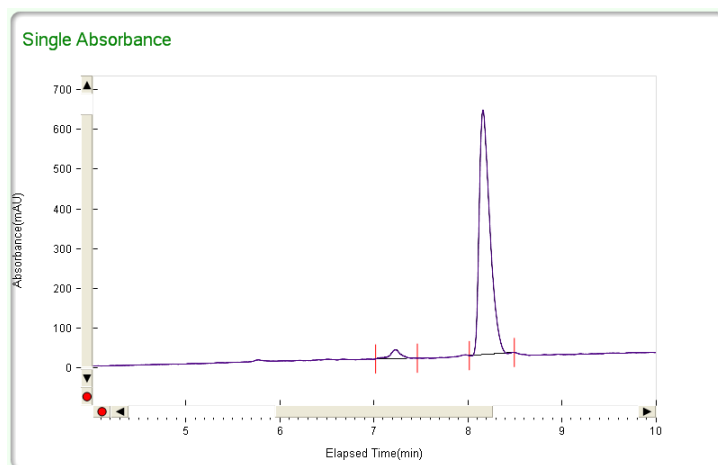

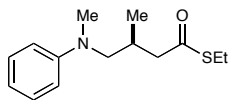

**(S)-S-ethyl 3-methyl-4-(methyl(phenyl)amino)butanethioate**  
(Scheme 2, 7)

**Racemic:** SFC, Chiracel OJ-H, 3% MeOH/CO<sub>2</sub>, 3 mL/min, 249 nm

| peak  | % area  | area       | RT (min) | height (mV) |
|-------|---------|------------|----------|-------------|
| 1     | 50.4536 | 6212.0804  | 5.63 min | 397.5879    |
| 2     | 49.5464 | 6100.3929  | 6.14 min | 350.7472    |
| Total | 100     | 12312.4732 |          |             |

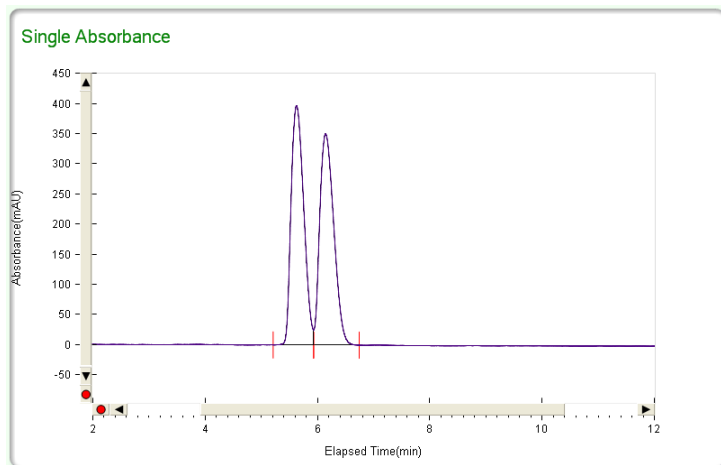

**Scalemic:** SFC, Chiracel OJ-H, 3% MeOH/CO<sub>2</sub>, 3 mL/min, 249 nm

| peak  | % area  | area       | RT (min) | height (mV) |
|-------|---------|------------|----------|-------------|
| 1     | 3.7355  | 568.4328   | 5.43 min | 43.4693     |
| 2     | 96.2645 | 14648.6639 | 5.92 min | 885.7859    |
| Total | 100     | 15217.0968 |          |             |

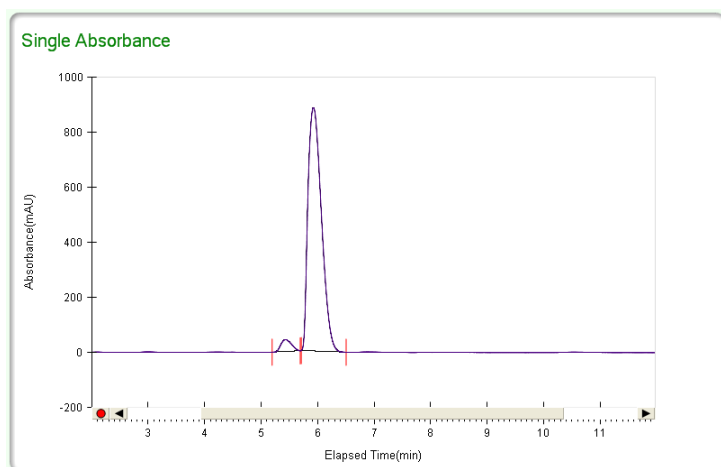



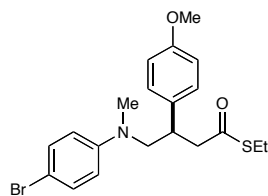

**(R)-S-ethyl-4-((4-bromophenyl)(methyl)amino)-3-(4-methoxyphenyl)butanethioate**

**Racemic:** SFC, Chiracel AD-H, 5 to 50% i-PrOH/CO<sub>2</sub>, 3 mL/min, 249 nm

| peak  | % area  | area       | RT (min) | height (mV) |
|-------|---------|------------|----------|-------------|
| 1     | 48.8607 | 9764.4937  | 6.96 min | 1330.9417   |
| 2     | 51.1393 | 10219.8625 | 7.72 min | 1282.8100   |
| Total | 100     | 19984.3562 |          |             |

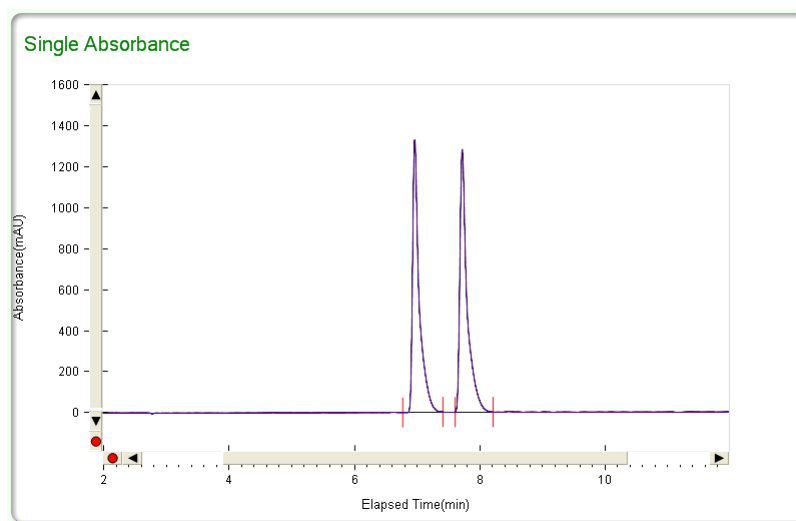

**Scalemic:** SFC, Chiracel AD-H, 5 to 50% i-PrOH/CO<sub>2</sub>, 3 mL/min, 249 nm

| peak  | % area  | area       | RT (min) | height (mV) |
|-------|---------|------------|----------|-------------|
| 1     | 2.7265  | 405.3188   | 6.98 min | 62.9752     |
| 2     | 97.2735 | 14460.5767 | 7.73 min | 1785.2633   |
| Total | 100     | 14865.8955 |          |             |

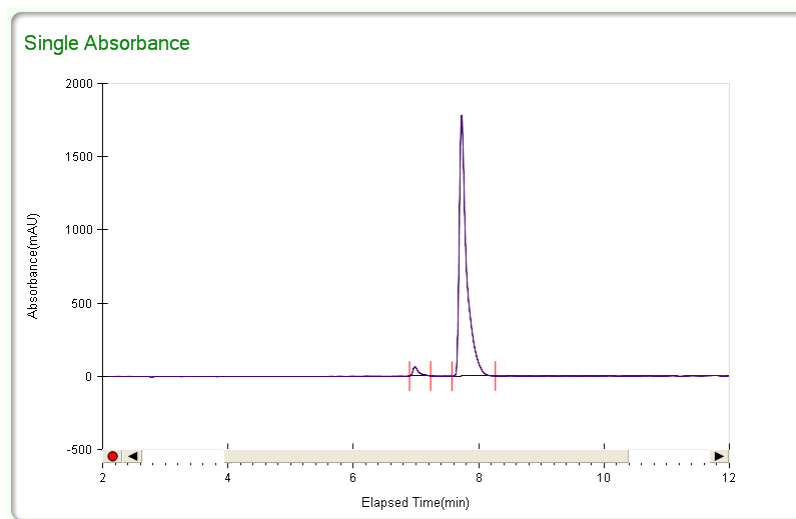

## IX. X-Ray Crystallographic Data

### (S)-1-phenylethanaminium (R)-4-((4-bromophenyl)(methyl)amino)-3-(4-methoxyphenyl)butanoate

#### Data Collection

A colorless crystal with approximate dimensions 0.624 x 0.035 x 0.023 mm<sup>3</sup> was selected under oil under ambient conditions and attached to the tip of a MiTeGen MicroMount©. The crystal was mounted in a stream of cold nitrogen at 100(1) K and centered in the X-ray beam by using a video camera.

The crystal evaluation and data collection were performed on a Bruker Quazar SMART APEXII diffractometer with Mo K $\alpha$  ( $\lambda = 0.71073$  Å) radiation and the diffractometer to crystal distance of 4.96 cm.

The initial cell constants were obtained from three series of  $\omega$  scans at different starting angles. Each series consisted of 12 frames collected at intervals of 0.5° in a 60° range about  $\omega$  with the exposure time of 60 seconds per frame. The reflections were successfully indexed by an automated indexing routine built in the APEXII program suite. The final cell constants were calculated from a set of 4577 strong reflections from the actual data collection.

The data were collected by using the full sphere data collection routine to survey the reciprocal space to the extent of a full sphere to a resolution of 0.70 Å. A total of 35907 data were harvested by collecting 4 sets of frames with 0.5° scans in  $\omega$  and  $\phi$  with exposure times of 120 sec per frame. These highly redundant datasets were corrected for Lorentz and polarization effects. The absorption correction was based on fitting a function to the empirical transmission surface as sampled by multiple equivalent measurements.<sup>8</sup>

#### Structure Solution and Refinement

The systematic absences in the diffraction data were uniquely consistent for the space group  $P2_12_12_1$  that yielded chemically reasonable and computationally stable results of refinement.<sup>9,10,11</sup>

A successful solution by the direct methods provided most non-hydrogen atoms from the  $E$ -map. The remaining non-hydrogen atoms were located in an alternating series of least-squares cycles and difference Fourier maps. All non-hydrogen atoms were refined with anisotropic displacement coefficients. All hydrogen atoms were included in the structure factor calculation at idealized positions and were allowed to ride on the neighboring atoms with relative isotropic displacement coefficients.

The asymmetric unit consists of the carboxylate shown in Figure S1 and the  $S$ -methylbenzyl ammonium counter ion. The absolute configuration was established by anomalous dispersion and is consistent with the known stereochemistry of the  $S$ -methylbenzyl ammonium reference ion.

The carboxylate and ammonium ions pack to form an infinite chain of two independent rings. Each ring is formed by hydrogen bonds between N2, O2, and O3 of adjacent ions (Graph set notation:  $R_4^3(10)R_4^3(10)$ ). The two independent rings share an edge formed by hydrogen bonds between N3 and O3 of adjacent ions through H3C.

The final least-squares refinement of 294 parameters against 5011 data resulted in residuals  $R$  (based on  $F^2$  for  $I \geq 2\sigma$ ) and  $wR$  (based on  $F^2$  for all data) of 0.0362 and 0.0760, respectively. The final difference Fourier map was featureless.

#### Summary

**Crystal Data** for C<sub>18</sub>H<sub>19</sub>BrNO<sub>3</sub>, C<sub>8</sub>H<sub>12</sub>N ( $M = 499.44$ ): orthorhombic, space group  $P2_12_12_1$  (no. 19),  $a = 6.426(2)$  Å,  $b = 18.229(7)$  Å,  $c = 20.879(7)$  Å,  $V = 2445.7(15)$  Å<sup>3</sup>,  $Z = 4$ ,  $T = 100.0$  K,  $\mu(\text{MoK}\alpha) = 1.710$  mm<sup>-1</sup>,  $D_{\text{calc}} = 1.356$  g/mm<sup>3</sup>, 35907 reflections measured ( $2.966 \leq 2\theta \leq 52.902$ ), 5011 unique ( $R_{\text{int}} = 0.0816$ ,  $R_{\text{sigma}} = 0.0497$ ) which were used in all calculations. The final  $R_1$  was 0.0362 ( $I > 2\sigma(I)$ ) and  $wR_2$  was 0.0760 (all data).

The molecular diagram is drawn with 50% probability ellipsoids. All H atoms except those on heteroatoms and chiral carbons are omitted for clarity.

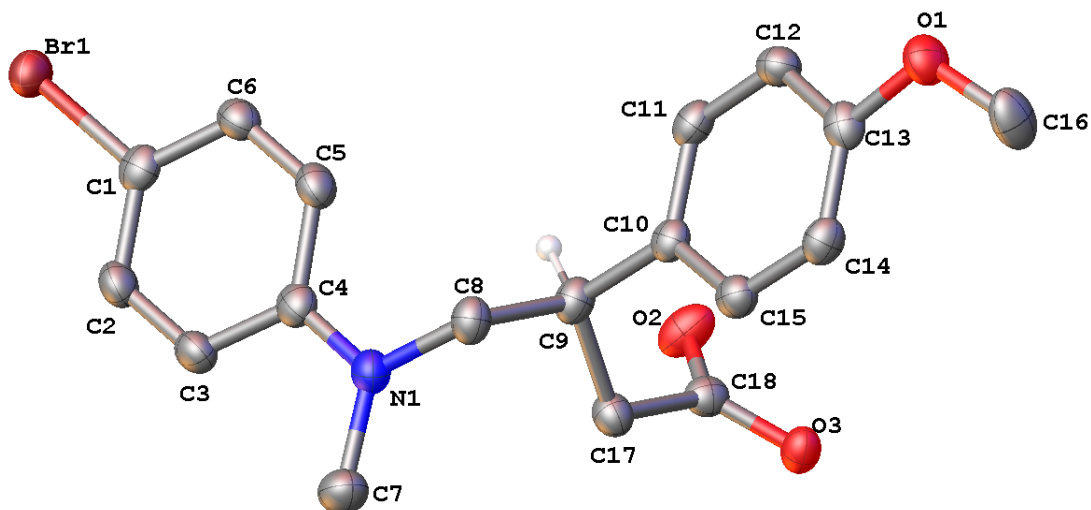

**Figure S1.** A molecular drawing of (S)-1-phenylethanaminium (R)-4-((4-bromophenyl)(methyl)amino)-3-(4-methoxyphenyl)butanoate.

**Table S1.** Crystal data and structure refinement for Yoon35.

|                                       |                                                                                      |
|---------------------------------------|--------------------------------------------------------------------------------------|
| Identification code                   | Yoon35                                                                               |
| Empirical formula                     | C <sub>18</sub> H <sub>19</sub> BrNO <sub>3</sub> , C <sub>8</sub> H <sub>12</sub> N |
| Formula weight                        | 499.44                                                                               |
| Temperature/K                         | 100.0                                                                                |
| Crystal system                        | orthorhombic                                                                         |
| Space group                           | P2 <sub>1</sub> 2 <sub>1</sub> 2 <sub>1</sub>                                        |
| a/Å                                   | 6.426(2)                                                                             |
| b/Å                                   | 18.229(7)                                                                            |
| c/Å                                   | 20.879(7)                                                                            |
| α/°                                   | 90                                                                                   |
| β/°                                   | 90                                                                                   |
| γ/°                                   | 90                                                                                   |
| Volume/Å <sup>3</sup>                 | 2445.7(15)                                                                           |
| Z                                     | 4                                                                                    |
| ρ <sub>calc</sub> /mg/mm <sup>3</sup> | 1.356                                                                                |
| μ/mm <sup>-1</sup>                    | 1.710                                                                                |
| F(000)                                | 1040.0                                                                               |
| Crystal size/mm <sup>3</sup>          | 0.624 × 0.035 × 0.023                                                                |
| Radiation                             | MoKα (λ = 0.71073)                                                                   |
| 2θ range for data collection          | 2.966 to 52.902°                                                                     |
| Index ranges                          | -8 ≤ h ≤ 8, -21 ≤ k ≤ 22, -26 ≤ l ≤ 26                                               |
| Reflections collected                 | 35907                                                                                |
| Independent reflections               | 5011 [R <sub>int</sub> = 0.0816, R <sub>sigma</sub> = 0.0497]                        |
| Data/restraints/parameters            | 5011/0/294                                                                           |
| Goodness-of-fit on F <sup>2</sup>     | 1.041                                                                                |

Final R indexes [ $I \geq 2\sigma(I)$ ]  $R_1 = 0.0362$ ,  $wR_2 = 0.0721$   
 Final R indexes [all data]  $R_1 = 0.0484$ ,  $wR_2 = 0.0760$   
 Largest diff. peak/hole /  $e \text{ \AA}^{-3}$  0.34/-0.40  
 Flack x parameter -0.012(11)  
 Hooft y parameter 0.002(5)

**Table S2.** Fractional Atomic Coordinates ( $\times 10^4$ ) and Equivalent Isotropic Displacement Parameters ( $\text{\AA}^2 \times 10^3$ ) for Yoon35.  $U_{eq}$  is defined as 1/3 of the trace of the orthogonalised  $U_{ij}$  tensor.

| Atom | x          | y          | z          | U(eq)     |
|------|------------|------------|------------|-----------|
| Br1  | 12248.7(6) | 6159.3(2)  | 9668.4(2)  | 31.72(12) |
| O1   | -128(5)    | 4424.0(17) | 5768.5(15) | 34.1(7)   |
| O2   | 7123(5)    | 7166.7(17) | 6198.0(14) | 37.6(7)   |
| O3   | 4264(4)    | 7600.3(16) | 5744.2(14) | 28.8(7)   |
| N1   | 4397(6)    | 7150(2)    | 8294.4(16) | 29.2(8)   |
| C1   | 9859(7)    | 6486(2)    | 9215(2)    | 28.3(10)  |
| C2   | 9021(7)    | 7165(3)    | 9340(2)    | 30.8(10)  |
| C3   | 7241(7)    | 7391(2)    | 9028.6(18) | 30.1(9)   |
| C4   | 6230(7)    | 6937(2)    | 8582(2)    | 27.7(10)  |
| C5   | 7158(6)    | 6247(2)    | 8460.8(18) | 29.5(9)   |
| C6   | 8937(6)    | 6030(2)    | 8771(2)    | 28.5(10)  |
| C7   | 3457(7)    | 7843(3)    | 8466(2)    | 37.2(11)  |
| C8   | 3288(6)    | 6655(2)    | 7864.7(19) | 28.1(10)  |
| C9   | 4194(7)    | 6620(2)    | 7180(2)    | 27.1(10)  |
| C10  | 3009(6)    | 6056(2)    | 6791.2(18) | 24.5(9)   |
| C11  | 3901(7)    | 5378(2)    | 6650(2)    | 27.9(10)  |
| C12  | 2822(7)    | 4849(2)    | 6310.3(19) | 27.9(9)   |
| C13  | 810(6)     | 4992(2)    | 6096(2)    | 27.6(10)  |
| C14  | -96(6)     | 5659(2)    | 6227(2)    | 28.2(10)  |
| C15  | 987(6)     | 6176(3)    | 6577.0(18) | 27.4(9)   |
| C16  | -1938(6)   | 4583(3)    | 5409(2)    | 41.1(11)  |
| C17  | 4204(7)    | 7381(2)    | 6873.0(19) | 27(1)     |
| C18  | 5292(6)    | 7380(2)    | 6224(2)    | 25.9(9)   |
| N2   | 192(5)     | 7830.3(18) | 5472.2(15) | 23.9(8)   |
| C19  | 200(6)     | 8651(2)    | 5485.3(19) | 27.3(10)  |
| C20  | -1795(7)   | 8939(2)    | 5188(2)    | 36.8(11)  |
| C21  | 608(6)     | 8905(2)    | 6167(2)    | 30.1(9)   |
| C22  | 2561(7)    | 9155(2)    | 6343.2(19) | 30.0(9)   |
| C23  | 2982(8)    | 9366(2)    | 6969(2)    | 35.1(11)  |
| C24  | 1433(8)    | 9320(3)    | 7423(2)    | 39.8(12)  |
| C25  | -532(8)    | 9082(3)    | 7253(2)    | 48.0(14)  |
| C26  | -947(7)    | 8867(3)    | 6628(2)    | 39.8(11)  |

**Table S3.** Anisotropic Displacement Parameters ( $\text{\AA}^2 \times 10^3$ ) for Yoon35. The Anisotropic displacement factor exponent takes the form:  $-2\pi^2[h^2a^{*2}U_{11}+2hka^*b^*U_{12}+\dots]$ .

| Atom | $U_{11}$ | $U_{22}$ | $U_{33}$ | $U_{23}$ | $U_{13}$  | $U_{12}$ |
|------|----------|----------|----------|----------|-----------|----------|
| Br1  | 32.4(2)  | 31.9(2)  | 30.8(2)  | 0.2(2)   | -5.38(19) | -1.6(2)  |
| O1   | 34.3(17) | 33.7(18) | 34.3(18) | -3.6(14) | -3.4(14)  | -5.9(14) |
| O2   | 25.6(15) | 46.4(18) | 40.9(17) | 15.8(15) | 6.2(14)   | 4.3(16)  |
| O3   | 27.6(15) | 36.0(18) | 22.8(16) | 0.3(14)  | -0.3(12)  | 4.3(14)  |
| N1   | 35(2)    | 29(2)    | 23.5(19) | -0.7(16) | -2.6(15)  | 0.7(17)  |
| C1   | 30(2)    | 32(2)    | 23(2)    | 6.6(19)  | 2.4(18)   | -3(2)    |
| C2   | 39(3)    | 28(2)    | 25(2)    | -5(2)    | -2.7(19)  | -4(2)    |
| C3   | 39(2)    | 27(2)    | 25(2)    | -3.6(17) | 2(2)      | 2(2)     |
| C4   | 34(2)    | 27(2)    | 22(2)    | 3.2(18)  | 1.8(18)   | -2.1(19) |
| C5   | 37(2)    | 27(2)    | 25(2)    | -2.5(17) | -0.8(18)  | -5(2)    |
| C6   | 35(2)    | 23(3)    | 27(2)    | -1.4(19) | 1.8(18)   | -1.6(19) |
| C7   | 41(3)    | 34(3)    | 36(3)    | 0(2)     | 0(2)      | 8(2)     |
| C8   | 28(2)    | 33(2)    | 23(2)    | 1.5(18)  | -0.1(17)  | -2.9(19) |
| C9   | 25(2)    | 32(2)    | 24(2)    | 4.0(19)  | -1.0(17)  | -3.0(19) |
| C10  | 25.9(19) | 27(2)    | 20.4(19) | 4.9(17)  | 1.4(16)   | -2(2)    |
| C11  | 25(2)    | 34(3)    | 25(2)    | 7.5(19)  | -0.8(18)  | 0(2)     |
| C12  | 30(2)    | 25(2)    | 28(2)    | 0.2(17)  | 3.0(19)   | 3(2)     |
| C13  | 28(2)    | 31(2)    | 23(2)    | 1.4(19)  | 3.5(17)   | -7(2)    |
| C14  | 23(2)    | 35(3)    | 27(2)    | 4(2)     | -0.6(18)  | -1.1(19) |
| C15  | 29(2)    | 29(2)    | 24(2)    | 1(2)     | 2.8(16)   | 2(2)     |
| C16  | 29(2)    | 54(3)    | 41(3)    | -15(2)   | -5(2)     | -5(2)    |
| C17  | 30(2)    | 27(2)    | 24(2)    | -1.5(18) | 1.7(17)   | -3.0(19) |
| C18  | 25(2)    | 23(2)    | 30(2)    | 0.5(18)  | -0.1(18)  | -2.6(18) |
| N2   | 23.6(17) | 31(2)    | 17.1(19) | -2.1(15) | -0.4(14)  | 1.7(15)  |
| C19  | 34(2)    | 24(2)    | 24(2)    | -0.1(16) | 1.0(17)   | -5.3(17) |
| C20  | 45(2)    | 31(2)    | 34(3)    | 0(2)     | -8.0(19)  | 4(2)     |
| C21  | 39(2)    | 23(2)    | 28(2)    | -1(2)    | -2.3(18)  | 1(2)     |
| C22  | 33(2)    | 26(2)    | 31(2)    | -0.2(17) | 0(2)      | 1(2)     |
| C23  | 38(2)    | 29(2)    | 39(3)    | -6(2)    | -10(2)    | 7(2)     |
| C24  | 52(3)    | 38(3)    | 29(3)    | -11(2)   | -6(2)     | 6(2)     |
| C25  | 51(3)    | 60(4)    | 33(3)    | -15(2)   | 8(2)      | -9(3)    |
| C26  | 39(2)    | 47(3)    | 34(3)    | -14(3)   | 4.2(19)   | -3(3)    |

**Table S4.** Bond Lengths for Yoon35.

| Atom | Atom | Length/ $\text{\AA}$ | Atom | Atom | Length/ $\text{\AA}$ |
|------|------|----------------------|------|------|----------------------|
| Br1  | C1   | 1.899(4)             | C10  | C11  | 1.393(6)             |
| O1   | C13  | 1.380(5)             | C10  | C15  | 1.391(5)             |
| O1   | C16  | 1.414(5)             | C11  | C12  | 1.383(6)             |
| O2   | C18  | 1.240(5)             | C12  | C13  | 1.392(6)             |
| O3   | C18  | 1.265(5)             | C13  | C14  | 1.374(6)             |

|    |     |          |     |     |          |
|----|-----|----------|-----|-----|----------|
| N1 | C4  | 1.378(5) | C14 | C15 | 1.381(6) |
| N1 | C7  | 1.447(6) | C17 | C18 | 1.525(6) |
| N1 | C8  | 1.458(5) | N2  | C19 | 1.497(5) |
| C1 | C2  | 1.374(6) | C19 | C20 | 1.517(6) |
| C1 | C6  | 1.380(6) | C19 | C21 | 1.519(6) |
| C2 | C3  | 1.379(6) | C21 | C22 | 1.385(6) |
| C3 | C4  | 1.405(6) | C21 | C26 | 1.389(6) |
| C4 | C5  | 1.414(6) | C22 | C23 | 1.389(6) |
| C5 | C6  | 1.372(6) | C23 | C24 | 1.376(7) |
| C8 | C9  | 1.544(6) | C24 | C25 | 1.381(7) |
| C9 | C10 | 1.516(6) | C25 | C26 | 1.389(6) |
| C9 | C17 | 1.529(6) |     |     |          |

**Table S5.** Bond Angles for Yoon35.

| Atom | Atom | Atom | Angle/°  | Atom | Atom | Atom | Angle/°  |
|------|------|------|----------|------|------|------|----------|
| C13  | O1   | C16  | 117.9(3) | C11  | C12  | C13  | 119.9(4) |
| C4   | N1   | C7   | 119.6(4) | O1   | C13  | C12  | 115.1(4) |
| C4   | N1   | C8   | 120.8(4) | C14  | C13  | O1   | 125.2(4) |
| C7   | N1   | C8   | 119.3(4) | C14  | C13  | C12  | 119.7(4) |
| C2   | C1   | Br1  | 120.3(3) | C13  | C14  | C15  | 119.7(4) |
| C2   | C1   | C6   | 120.1(4) | C14  | C15  | C10  | 122.2(4) |
| C6   | C1   | Br1  | 119.6(3) | C18  | C17  | C9   | 112.0(4) |
| C1   | C2   | C3   | 120.3(4) | O2   | C18  | O3   | 124.1(4) |
| C2   | C3   | C4   | 121.4(4) | O2   | C18  | C17  | 118.3(4) |
| N1   | C4   | C3   | 121.3(4) | O3   | C18  | C17  | 117.6(4) |
| N1   | C4   | C5   | 122.1(4) | N2   | C19  | C20  | 109.6(3) |
| C3   | C4   | C5   | 116.6(4) | N2   | C19  | C21  | 108.8(3) |
| C6   | C5   | C4   | 121.5(4) | C20  | C19  | C21  | 115.1(3) |
| C5   | C6   | C1   | 120.1(4) | C22  | C21  | C19  | 120.4(4) |
| N1   | C8   | C9   | 114.3(3) | C22  | C21  | C26  | 119.0(4) |
| C10  | C9   | C8   | 109.6(3) | C26  | C21  | C19  | 120.6(4) |
| C10  | C9   | C17  | 113.1(3) | C21  | C22  | C23  | 121.2(4) |
| C17  | C9   | C8   | 110.6(4) | C24  | C23  | C22  | 119.3(4) |
| C11  | C10  | C9   | 120.5(4) | C23  | C24  | C25  | 120.3(4) |
| C15  | C10  | C9   | 122.3(4) | C24  | C25  | C26  | 120.3(5) |
| C15  | C10  | C11  | 117.1(4) | C25  | C26  | C21  | 119.9(4) |
| C12  | C11  | C10  | 121.4(4) |      |      |      |          |

**Table S6.** Hydrogen Bonds for Yoon35.

| D  | H   | A               | d(D-H)/Å | d(H-A)/Å | d(D-A)/Å | D-H-A/° |
|----|-----|-----------------|----------|----------|----------|---------|
| N2 | H2A | O2 <sup>1</sup> | 0.91     | 1.86     | 2.765(4) | 171.1   |
| N2 | H2B | O3              | 0.91     | 1.84     | 2.710(4) | 158.5   |
| N2 | H2C | O3 <sup>2</sup> | 0.91     | 1.82     | 2.724(4) | 172.1   |

<sup>1</sup>-1+X,+Y,+Z; <sup>2</sup>-1/2+X,3/2-Y,1-Z

**Table S7.** Torsion Angles for Yoon35.

| A   | B   | C   | D   | Angle/°   | A   | B   | C   | D   | Angle/°   |
|-----|-----|-----|-----|-----------|-----|-----|-----|-----|-----------|
| Br1 | C1  | C2  | C3  | -177.6(3) | C9  | C17 | C18 | O3  | 122.8(4)  |
| Br1 | C1  | C6  | C5  | 177.2(3)  | C10 | C9  | C17 | C18 | -62.5(5)  |
| O1  | C13 | C14 | C15 | 178.0(4)  | C10 | C11 | C12 | C13 | 0.8(6)    |
| N1  | C4  | C5  | C6  | -177.2(4) | C11 | C10 | C15 | C14 | -1.4(6)   |
| N1  | C8  | C9  | C10 | 176.4(3)  | C11 | C12 | C13 | O1  | -179.4(4) |
| N1  | C8  | C9  | C17 | -58.2(5)  | C11 | C12 | C13 | C14 | -0.3(6)   |
| C1  | C2  | C3  | C4  | 0.5(6)    | C12 | C13 | C14 | C15 | -0.9(6)   |
| C2  | C1  | C6  | C5  | -1.2(6)   | C13 | C14 | C15 | C10 | 1.8(6)    |
| C2  | C3  | C4  | N1  | 176.8(4)  | C15 | C10 | C11 | C12 | 0.1(6)    |
| C2  | C3  | C4  | C5  | -1.3(6)   | C16 | O1  | C13 | C12 | -165.2(4) |
| C3  | C4  | C5  | C6  | 0.9(6)    | C16 | O1  | C13 | C14 | 15.8(6)   |
| C4  | N1  | C8  | C9  | -79.6(5)  | C17 | C9  | C10 | C11 | 130.5(4)  |
| C4  | C5  | C6  | C1  | 0.3(6)    | C17 | C9  | C10 | C15 | -51.5(5)  |
| C6  | C1  | C2  | C3  | 0.8(6)    | N2  | C19 | C21 | C22 | 102.3(4)  |
| C7  | N1  | C4  | C3  | -1.7(6)   | N2  | C19 | C21 | C26 | -75.5(5)  |
| C7  | N1  | C4  | C5  | 176.4(4)  | C19 | C21 | C22 | C23 | -177.9(4) |
| C7  | N1  | C8  | C9  | 106.2(4)  | C19 | C21 | C26 | C25 | 178.2(5)  |
| C8  | N1  | C4  | C3  | -175.9(4) | C20 | C19 | C21 | C22 | -134.4(4) |
| C8  | N1  | C4  | C5  | 2.2(6)    | C20 | C19 | C21 | C26 | 47.8(6)   |
| C8  | C9  | C10 | C11 | -105.6(4) | C21 | C22 | C23 | C24 | 0.7(6)    |
| C8  | C9  | C10 | C15 | 72.4(5)   | C22 | C21 | C26 | C25 | 0.3(7)    |
| C8  | C9  | C17 | C18 | 174.1(3)  | C22 | C23 | C24 | C25 | -1.6(7)   |
| C9  | C10 | C11 | C12 | 178.2(4)  | C23 | C24 | C25 | C26 | 1.9(8)    |
| C9  | C10 | C15 | C14 | -179.5(4) | C24 | C25 | C26 | C21 | -1.3(8)   |
| C9  | C17 | C18 | O2  | -57.5(5)  | C26 | C21 | C22 | C23 | 0.0(7)    |

**Table S8.** Hydrogen Atom Coordinates ( $\text{\AA}\times 10^4$ ) and Isotropic Displacement Parameters ( $\text{\AA}^2\times 10^3$ ) for Yoon35.

| Atom | x     | y    | z    | U(eq) |
|------|-------|------|------|-------|
| H2   | 9671  | 7480 | 9643 | 37    |
| H3   | 6686  | 7863 | 9117 | 36    |
| H5   | 6535  | 5927 | 8157 | 35    |
| H6   | 9534  | 5565 | 8679 | 34    |
| H7A  | 3229  | 7860 | 8930 | 56    |
| H7B  | 2122  | 7896 | 8244 | 56    |
| H7C  | 4385  | 8245 | 8340 | 56    |
| H8A  | 1817  | 6813 | 7838 | 34    |
| H8B  | 3308  | 6156 | 8051 | 34    |
| H9   | 5670  | 6450 | 7214 | 33    |
| H11  | 5279  | 5278 | 6789 | 33    |
| H12  | 3453  | 4389 | 6223 | 33    |
| H14  | -1460 | 5763 | 6077 | 34    |
| H15  | 329   | 6629 | 6675 | 33    |
| H16A | -3042 | 4751 | 5698 | 62    |
| H16B | -2398 | 4140 | 5184 | 62    |
| H16C | -1627 | 4969 | 5096 | 62    |
| H17A | 2752  | 7551 | 6818 | 32    |
| H17B | 4919  | 7730 | 7162 | 32    |
| H2A  | -862  | 7660 | 5722 | 29    |
| H2B  | 1428  | 7659 | 5624 | 29    |
| H2C  | 5     | 7673 | 5063 | 29    |
| H19  | 1387  | 8823 | 5214 | 33    |
| H20A | -2993 | 8741 | 5422 | 55    |
| H20B | -1868 | 8785 | 4739 | 55    |
| H20C | -1811 | 9476 | 5212 | 55    |
| H22  | 3632  | 9182 | 6030 | 36    |
| H23  | 4324  | 9542 | 7083 | 42    |
| H24  | 1718  | 9452 | 7854 | 48    |
| H25  | -1605 | 9066 | 7566 | 58    |
| H26  | -2293 | 8695 | 6516 | 48    |



## (S)-1-phenylethanaminium (S)-4-((4-bromophenyl)(methyl)amino)-3-methylbutanoate

### Data Collection

A colorless crystal with approximate dimensions 0.788 x 0.121 x 0.084 mm<sup>3</sup> was selected under oil under ambient conditions and attached to the tip of a MiTeGen MicroMount©. The crystal was mounted in a stream of cold nitrogen at 100(1) K and centered in the X-ray beam by using a video camera.

The crystal evaluation and data collection were performed on a Bruker SMART APEXII diffractometer with Cu K $\alpha$  ( $\lambda = 1.54178 \text{ \AA}$ ) radiation and the diffractometer to crystal distance of 4.03 cm.

The initial cell constants were obtained from three series of  $\omega$  scans at different starting angles. Each series consisted of 41 frames collected at intervals of 0.6° in a 25° range about  $\omega$  with the exposure time of 5 seconds per frame. The reflections were successfully indexed by an automated indexing routine built in the APEXII program. The final cell constants were calculated from a set of 9976 strong reflections from the actual data collection.

The data were collected by using the full sphere data collection routine to survey the reciprocal space to the extent of a full sphere to a resolution of 0.82 Å. A total of 29437 data were harvested by collecting 31 sets of frames with 0.6° scans in  $\omega$  and  $\phi$  with an exposure time 10-20 sec per frame. These highly redundant datasets were corrected for Lorentz and polarization effects. The absorption correction was based on fitting a function to the empirical transmission surface as sampled by multiple equivalent measurements.<sup>8</sup>

### Structure Solution and Refinement

The systematic absences in the diffraction data were consistent for the space groups  $P2_1$  and  $P2_1/m$ . The  $E$ -statistics strongly suggested the non-centrosymmetric space group  $P2_1$  that yielded chemically reasonable and computationally stable results of refinement.<sup>9,10,11</sup>

A successful solution by the direct methods provided most non-hydrogen atoms from the  $E$ -map. The remaining non-hydrogen atoms were located in an alternating series of least-squares cycles and difference Fourier maps. All non-hydrogen atoms were refined with anisotropic displacement coefficients. The ammonium H atoms were located from the difference map and refined independently. All other hydrogen atoms were included in the structure factor calculation at idealized positions and were allowed to ride on the neighboring atoms with relative isotropic displacement coefficients.

The asymmetric unit of the Yoon36 consists of the carboxylate shown in Figure S2 and the *S*-methylbenzyl ammonium counter ion. Bond distance restraints were used on the N-H bonds of the *S*-methylbenzyl ammonium cation to ensure a chemically reasonable and computationally stable refinement.

The absolute configuration of the carboxylate shown in Figure S2 is *S*. The absolute configuration was unequivocally established by anomalous dispersion, and it is consistent with the known configuration of the *S*-methylbenzyl ammonium reference ion.

The carboxylate and ammonium ions pack to form an infinite chain of two symmetry-independent hydrogen-bonded rings in the crystallographic  $b$  direction. Each ring is formed by hydrogen bonds between N2, O1, and O2 of adjacent ions (graph set notation:  $R_4^3(10)R_4^3(10)$ ). The two independent rings share an edge formed by hydrogen bond N2-H2B...O1 between adjacent ions.

The final least-squares refinement of 230 parameters against 3904 data resulted in residuals  $R$  (based on  $F^2$  for  $I \geq 2\sigma$ ) and  $wR$  (based on  $F^2$  for all data) of 0.0314 and 0.0854, respectively. The final difference Fourier map was featureless.

### Summary

**Crystal Data** for C<sub>20</sub>H<sub>27</sub>N<sub>2</sub>O<sub>2</sub>Br ( $M = 407.34 \text{ g/mol}$ ): monoclinic, space group  $P2_1$  (no. 4),  $a = 11.787(4) \text{ \AA}$ ,  $b = 6.031(2) \text{ \AA}$ ,  $c = 15.094(4) \text{ \AA}$ ,  $\beta = 111.35(2)^\circ$ ,  $V = 999.5(6) \text{ \AA}^3$ ,  $Z = 2$ ,  $T = 100.0 \text{ K}$ ,  $\mu(\text{CuK}\alpha) = 2.915 \text{ mm}^{-1}$ ,  $D_{\text{calc}} = 1.353 \text{ g/cm}^3$ , 29437 reflections measured ( $6.286^\circ \leq 2\theta \leq 144.632^\circ$ ), 3904 unique ( $R_{\text{int}} = 0.0316$ ,  $R_{\text{sigma}} = 0.0142$ ) which were used in all calculations. The final  $R_1$  was 0.0314 ( $I > 2\sigma(I)$ ) and  $wR_2$  was 0.0855 (all data).

The molecular diagram is drawn with 50% probability ellipsoids. All H atoms except those on heteroatoms and chiral carbons are omitted for clarity.

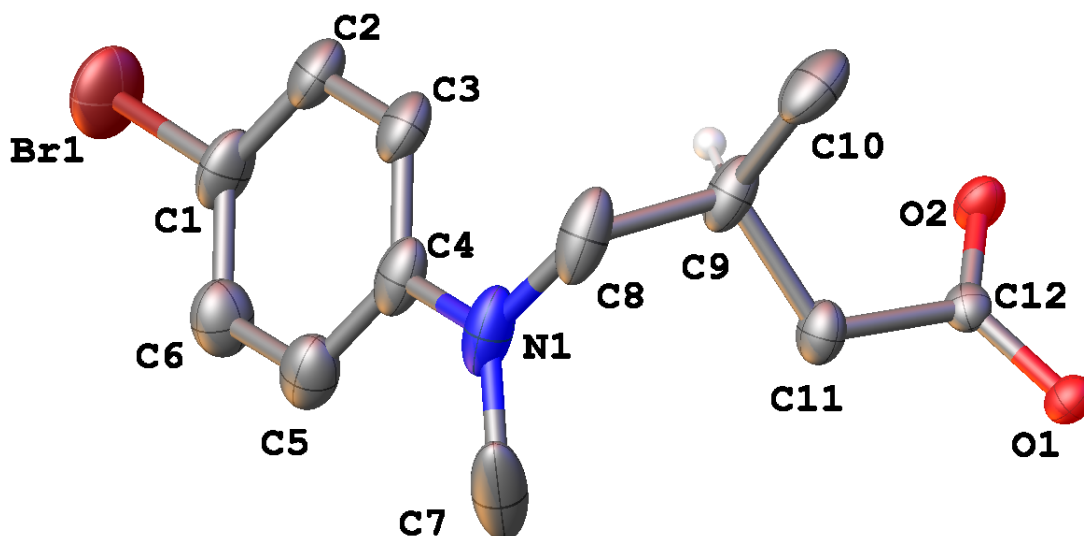

**Figure S2.** A molecular drawing of (S)-1-phenylethanaminium (S)-4-((4-bromophenyl)(methyl)amino)-3-methylbutanoate.

**Table S9.** Crystal data and structure refinement for Yoon36.

|                                                |                                                                                   |
|------------------------------------------------|-----------------------------------------------------------------------------------|
| Identification code                            | Yoon36                                                                            |
| Empirical formula                              | $[\text{C}_8\text{H}_{12}\text{N}]^+ [\text{C}_{12}\text{H}_{15}\text{BrNO}_2]^-$ |
| Formula weight                                 | 407.34                                                                            |
| Temperature/K                                  | 100.0                                                                             |
| Crystal system                                 | monoclinic                                                                        |
| Space group                                    | $P2_1$                                                                            |
| $a/\text{\AA}$                                 | 11.787(4)                                                                         |
| $b/\text{\AA}$                                 | 6.031(2)                                                                          |
| $c/\text{\AA}$                                 | 15.094(4)                                                                         |
| $\alpha/^\circ$                                | 90                                                                                |
| $\beta/^\circ$                                 | 111.35(2)                                                                         |
| $\gamma/^\circ$                                | 90                                                                                |
| Volume/ $\text{\AA}^3$                         | 999.5(6)                                                                          |
| Z                                              | 2                                                                                 |
| $\rho_{\text{calc}}/\text{g/cm}^3$             | 1.353                                                                             |
| $\mu/\text{mm}^{-1}$                           | 2.915                                                                             |
| F(000)                                         | 424.0                                                                             |
| Crystal size/ $\text{mm}^3$                    | 0.788 × 0.121 × 0.084                                                             |
| Radiation                                      | CuK $\alpha$ ( $\lambda = 1.54178$ )                                              |
| 2 $\theta$ range for data collection/ $^\circ$ | 6.286 to 144.632                                                                  |
| Index ranges                                   | $-14 \leq h \leq 14, -7 \leq k \leq 7, -18 \leq l \leq 18$                        |
| Reflections collected                          | 29437                                                                             |
| Independent reflections                        | 3904 [ $R_{\text{int}} = 0.0316, R_{\text{sigma}} = 0.0142$ ]                     |
| Data/restraints/parameters                     | 3904/4/230                                                                        |

|                                                |                                  |
|------------------------------------------------|----------------------------------|
| Goodness-of-fit on $F^2$                       | 1.085                            |
| Final R indexes [ $I > 2\sigma(I)$ ]           | $R_1 = 0.0314$ , $wR_2 = 0.0850$ |
| Final R indexes [all data]                     | $R_1 = 0.0317$ , $wR_2 = 0.0854$ |
| Largest diff. peak/hole / $e \text{ \AA}^{-3}$ | 0.76/-0.70                       |
| Flack parameter                                | -0.03(2)                         |

**Table S10.** Fractional Atomic Coordinates ( $\times 10^4$ ) and Equivalent Isotropic Displacement Parameters ( $\text{\AA}^2 \times 10^3$ ) for Yoon36.  $U_{eq}$  is defined as 1/3 of the trace of the orthogonalised  $U_{ij}$  tensor.

| Atom | x          | y         | z          | U(eq)     |
|------|------------|-----------|------------|-----------|
| Br1  | 8644.5(4)  | 3468.3(7) | 2576.9(3)  | 57.23(17) |
| O1   | 8689.5(18) | 1131(3)   | 9128.8(15) | 21.6(4)   |
| O2   | 8285.1(19) | 3901(3)   | 8084.8(14) | 25.8(5)   |
| N1   | 7238(3)    | -1584(7)  | 5505.7(19) | 44.9(7)   |
| C1   | 8221(2)    | 1868(4)   | 3493.4(15) | 40.4(8)   |
| C2   | 7332(2)    | 2723(3)   | 3799.8(15) | 38.0(8)   |
| C3   | 7003.4(18) | 1576(4)   | 4468.4(15) | 36.3(8)   |
| C4   | 7564(2)    | -427(4)   | 4830.7(14) | 36.7(8)   |
| C5   | 8454(2)    | -1282(3)  | 4524.3(16) | 42.5(8)   |
| C6   | 8782(2)    | -134(4)   | 3855.7(17) | 43.0(8)   |
| C7   | 7972(6)    | -3503(7)  | 5977(3)    | 65.7(15)  |
| C8   | 6313(4)    | -768(8)   | 5843(2)    | 47.4(10)  |
| C9   | 6713(3)    | 1074(6)   | 6601(2)    | 34.4(8)   |
| C10  | 5626(3)    | 1842(8)   | 6833(3)    | 45.1(9)   |
| C11  | 7740(3)    | 222(5)    | 7487(2)    | 28.6(6)   |
| C12  | 8263(2)    | 1905(5)   | 8288(2)    | 20.5(5)   |
| N2   | 8926(2)    | 6699(4)   | 9617.7(17) | 19.1(5)   |
| C13  | 6208(3)    | 7445(5)   | 9055(2)    | 24.8(6)   |
| C14  | 4986(3)    | 7079(6)   | 8518(2)    | 28.1(6)   |
| C15  | 4445(3)    | 5072(6)   | 8570(2)    | 30.3(7)   |
| C16  | 5119(3)    | 3429(6)   | 9172(2)    | 30.9(6)   |
| C17  | 6346(3)    | 3782(5)   | 9709(2)    | 26.7(6)   |
| C18  | 6896(3)    | 5782(5)   | 9650(2)    | 23.0(6)   |
| C19  | 8229(2)    | 6158(5)   | 10243(2)   | 21.7(5)   |
| C20  | 8432(3)    | 7991(5)   | 10980(2)   | 27.4(6)   |

**Table S11.** Anisotropic Displacement Parameters ( $\text{\AA}^2 \times 10^3$ ) for Yoon36. The Anisotropic displacement factor exponent takes the form:  $-2\pi^2[h^2a^{*2}U_{11}+2hka^*b^*U_{12}+\dots]$ .

| Atom | $U_{11}$ | $U_{22}$ | $U_{33}$ | $U_{23}$ | $U_{13}$ | $U_{12}$  |
|------|----------|----------|----------|----------|----------|-----------|
| Br1  | 79.7(3)  | 56.6(3)  | 44.7(2)  | 10.5(2)  | 33.7(2)  | -14.9(2)  |
| O1   | 20.3(9)  | 22.2(10) | 19.3(9)  | 1.3(8)   | 3.8(7)   | -1.4(7)   |
| O2   | 31.9(10) | 22.5(11) | 20.7(9)  | 2.9(8)   | 6.7(8)   | -3.3(8)   |
| N1   | 63.4(18) | 48.8(17) | 22.5(12) | -3.1(16) | 15.6(12) | -22.8(18) |

|     |          |          |          |          |          |           |
|-----|----------|----------|----------|----------|----------|-----------|
| C1  | 53(2)    | 44(2)    | 24.5(15) | 6.5(15)  | 13.8(14) | -16.0(17) |
| C2  | 38.7(16) | 48(2)    | 21.4(15) | 3.4(13)  | 3.3(13)  | -5.1(15)  |
| C3  | 32.1(15) | 51(2)    | 20.3(14) | 0.9(15)  | 3.4(12)  | -6.0(15)  |
| C4  | 45.6(18) | 39.3(18) | 21.5(14) | -2.5(14) | 7.8(14)  | -18.2(16) |
| C5  | 60(2)    | 33.4(19) | 33.1(16) | -1.9(16) | 16.2(15) | -9.0(18)  |
| C6  | 54(2)    | 42(2)    | 39.3(19) | -0.7(16) | 24.2(17) | -7.4(17)  |
| C7  | 144(5)   | 25.2(18) | 43(2)    | -3.1(16) | 52(3)    | -14(2)    |
| C8  | 52(2)    | 64(3)    | 23.1(16) | -4.2(16) | 11.2(15) | -32.0(19) |
| C9  | 32.4(15) | 46.3(19) | 20.3(14) | 1.3(14)  | 4.6(12)  | -17.9(15) |
| C10 | 29.2(16) | 69(3)    | 30.2(17) | 10.7(18) | 2.4(13)  | -3.6(17)  |
| C11 | 31.1(15) | 30.1(16) | 22.9(14) | -4.3(12) | 7.7(12)  | -8.3(12)  |
| C12 | 15.8(11) | 23.9(13) | 20.7(13) | -2.0(11) | 5.4(9)   | -1.1(10)  |
| N2  | 16.4(10) | 18.1(11) | 20.5(12) | 1.6(10)  | 4.0(9)   | 0.5(9)    |
| C13 | 21.6(13) | 24.8(14) | 27.8(15) | 4.2(12)  | 8.8(11)  | -0.7(11)  |
| C14 | 20.8(13) | 32.6(16) | 29.7(15) | 6.0(13)  | 7.8(11)  | 2.2(12)   |
| C15 | 21.2(13) | 36.0(17) | 34.0(17) | 0.0(13)  | 10.5(12) | -2.8(12)  |
| C16 | 29.7(14) | 26.8(14) | 41.5(16) | 2.1(16)  | 19.1(12) | -4.2(14)  |
| C17 | 26.1(13) | 22.6(15) | 35.4(14) | 6.6(13)  | 16.2(11) | 5.1(12)   |
| C18 | 22.6(13) | 24.2(14) | 24.9(14) | 2.1(12)  | 11.9(11) | 1.9(11)   |
| C19 | 19.9(12) | 22.3(13) | 22.9(13) | 5.0(11)  | 7.6(10)  | 3.8(10)   |
| C20 | 26.1(13) | 30.9(17) | 24.9(14) | -0.2(12) | 8.7(11)  | 5.6(12)   |

**Table S12.** Bond Lengths for Yoon36.

| Atom | Atom | Length/Å   | Atom | Atom | Length/Å |
|------|------|------------|------|------|----------|
| Br1  | C1   | 1.8964(16) | C9   | C10  | 1.518(5) |
| O1   | C12  | 1.272(4)   | C9   | C11  | 1.529(4) |
| O2   | C12  | 1.245(4)   | C11  | C12  | 1.526(4) |
| N1   | C4   | 1.400(3)   | N2   | C19  | 1.496(4) |
| N1   | C7   | 1.465(7)   | C13  | C14  | 1.389(4) |
| N1   | C8   | 1.447(6)   | C13  | C18  | 1.393(4) |
| C1   | C2   | 1.3900     | C14  | C15  | 1.384(5) |
| C1   | C6   | 1.3900     | C15  | C16  | 1.384(5) |
| C2   | C3   | 1.3900     | C16  | C17  | 1.393(4) |
| C3   | C4   | 1.3900     | C17  | C18  | 1.388(4) |
| C4   | C5   | 1.3900     | C18  | C19  | 1.516(4) |
| C5   | C6   | 1.3900     | C19  | C20  | 1.523(4) |
| C8   | C9   | 1.540(5)   |      |      |          |

**Table S13.** Bond Angles for Yoon36.

| Atom | Atom | Atom | Angle/°  | Atom | Atom | Atom | Angle/°  |
|------|------|------|----------|------|------|------|----------|
| C4   | N1   | C7   | 118.5(3) | C11  | C9   | C8   | 109.8(3) |

|     |    |     |            |     |     |     |          |
|-----|----|-----|------------|-----|-----|-----|----------|
| C4  | N1 | C8  | 121.9(4)   | C12 | C11 | C9  | 115.6(3) |
| C8  | N1 | C7  | 119.0(3)   | O1  | C12 | C11 | 116.5(3) |
| C2  | C1 | Br1 | 118.98(13) | O2  | C12 | O1  | 124.4(3) |
| C2  | C1 | C6  | 120.0      | O2  | C12 | C11 | 119.1(3) |
| C6  | C1 | Br1 | 121.02(13) | C14 | C13 | C18 | 119.9(3) |
| C3  | C2 | C1  | 120.0      | C15 | C14 | C13 | 120.5(3) |
| C4  | C3 | C2  | 120.0      | C14 | C15 | C16 | 119.8(3) |
| C3  | C4 | N1  | 120.1(2)   | C15 | C16 | C17 | 119.9(3) |
| C3  | C4 | C5  | 120.0      | C18 | C17 | C16 | 120.4(3) |
| C5  | C4 | N1  | 119.9(2)   | C13 | C18 | C19 | 120.5(3) |
| C6  | C5 | C4  | 120.0      | C17 | C18 | C13 | 119.5(3) |
| C5  | C6 | C1  | 120.0      | C17 | C18 | C19 | 120.0(3) |
| N1  | C8 | C9  | 116.1(3)   | N2  | C19 | C18 | 110.4(2) |
| C10 | C9 | C8  | 109.6(3)   | N2  | C19 | C20 | 109.0(2) |
| C10 | C9 | C11 | 111.5(3)   | C18 | C19 | C20 | 113.2(2) |

**Table S14.** Hydrogen Bonds for Yoon36.

| D  | H   | A               | d(D-H)/Å | d(H-A)/Å | d(D-A)/Å | D-H-A/° |
|----|-----|-----------------|----------|----------|----------|---------|
| N2 | H2A | O1 <sup>1</sup> | 0.80(2)  | 1.97(2)  | 2.760(3) | 168(3)  |
| N2 | H2B | O1 <sup>2</sup> | 0.80(2)  | 2.00(2)  | 2.779(3) | 163(3)  |
| N2 | H2C | O2              | 0.81(2)  | 1.93(2)  | 2.738(3) | 178(4)  |

<sup>1</sup>+X,1+Y,+Z; <sup>2</sup>-X,1/2+Y,2-Z

**Table S15.** Torsion Angles for Yoon36.

| A   | B  | C  | D   | Angle/°     | A   | B   | C   | D   | Angle/°   |
|-----|----|----|-----|-------------|-----|-----|-----|-----|-----------|
| Br1 | C1 | C2 | C3  | 179.76(18)  | C8  | N1  | C4  | C5  | -179.7(2) |
| Br1 | C1 | C6 | C5  | -179.75(18) | C8  | C9  | C11 | C12 | 177.8(3)  |
| N1  | C4 | C5 | C6  | -179.8(2)   | C9  | C11 | C12 | O1  | 150.5(3)  |
| N1  | C8 | C9 | C10 | 176.5(3)    | C9  | C11 | C12 | O2  | -31.8(4)  |
| N1  | C8 | C9 | C11 | -60.7(4)    | C10 | C9  | C11 | C12 | -60.5(4)  |
| C1  | C2 | C3 | C4  | 0.0         | C13 | C14 | C15 | C16 | 1.1(5)    |
| C2  | C1 | C6 | C5  | 0.0         | C13 | C18 | C19 | N2  | -58.9(4)  |
| C2  | C3 | C4 | N1  | 179.8(2)    | C13 | C18 | C19 | C20 | 63.6(3)   |
| C2  | C3 | C4 | C5  | 0.0         | C14 | C13 | C18 | C17 | -0.8(4)   |
| C3  | C4 | C5 | C6  | 0.0         | C14 | C13 | C18 | C19 | -179.7(3) |
| C4  | N1 | C8 | C9  | -79.2(4)    | C14 | C15 | C16 | C17 | -1.4(5)   |
| C4  | C5 | C6 | C1  | 0.0         | C15 | C16 | C17 | C18 | 0.5(5)    |
| C6  | C1 | C2 | C3  | 0.0         | C16 | C17 | C18 | C13 | 0.6(4)    |
| C7  | N1 | C4 | C3  | -170.8(3)   | C16 | C17 | C18 | C19 | 179.5(3)  |
| C7  | N1 | C4 | C5  | 9.0(4)      | C17 | C18 | C19 | N2  | 122.2(3)  |

C7 N1 C8 C9 92.0(5)      C17 C18 C19 C20 -115.3(3)  
 C8 N1 C4 C3 0.5(4)      C18 C13 C14 C15 0.0(5)

**Table S16.** Hydrogen Atom Coordinates ( $\text{\AA} \times 10^4$ ) and Isotropic Displacement Parameters ( $\text{\AA}^2 \times 10^3$ ) for Yoon36.

| Atom | x        | y        | z        | U(eq)  |
|------|----------|----------|----------|--------|
| H2   | 6948     | 4092     | 3552     | 46     |
| H3   | 6395     | 2160     | 4678     | 44     |
| H5   | 8837     | -2651    | 4772     | 51     |
| H6   | 9390     | -719     | 3646     | 52     |
| H7A  | 7901     | -4666    | 5507     | 99     |
| H7B  | 7679     | -4070    | 6464     | 99     |
| H7C  | 8826     | -3057    | 6277     | 99     |
| H8A  | 6006     | -2034    | 6109     | 57     |
| H8B  | 5623     | -202     | 5290     | 57     |
| H9   | 7025     | 2357     | 6337     | 41     |
| H10A | 4968     | 2294     | 6247     | 68     |
| H10B | 5866     | 3102     | 7272     | 68     |
| H10C | 5344     | 625      | 7131     | 68     |
| H11A | 7432     | -1065    | 7739     | 34     |
| H11B | 8410     | -315     | 7294     | 34     |
| H2A  | 8770(30) | 7930(40) | 9410(20) | 16(8)  |
| H2B  | 9640(20) | 6790(60) | 9940(20) | 13(7)  |
| H2C  | 8740(40) | 5850(60) | 9180(20) | 24(10) |
| H13  | 6574     | 8827     | 9015     | 30     |
| H14  | 4519     | 8216     | 8113     | 34     |
| H15  | 3613     | 4823     | 8192     | 36     |
| H16  | 4746     | 2061     | 9219     | 37     |
| H17  | 6809     | 2648     | 10118    | 32     |
| H19  | 8565     | 4749     | 10589    | 26     |
| H20A | 8110     | 9392     | 10657    | 41     |
| H20B | 9305     | 8148     | 11344    | 41     |
| H20C | 8009     | 7613     | 11411    | 41     |

## X. Chloride Effect Control Experiments

**Procedure.** The experiments summarized in Table S17 below were conducted using the following procedure. A dry 25 mL Schlenk tube was charged with Ru(bpy)<sub>3</sub>Cl<sub>2</sub>·6H<sub>2</sub>O (0.02 equiv.). Sc(III) Lewis acid (0.15 equiv), ligand **1c** (0.20 equiv), and TBACl (0.30 equiv) were added as appropriate. A solution containing amine **1** (1 equiv) and acceptor **2b** (1.5 equiv) in acetonitrile (0.05 M) was then added. The reaction was degassed by 3 freeze/pump/thaw cycles under nitrogen in the dark. The reaction was then allowed to stir while being irradiated by a 23 W (1280 lumen) compact fluorescent lamp at a distance of 30 cm for the time indicated. The reaction mixture was loaded directly through silica, concentrated by rotary evaporation, and analyzed by <sup>1</sup>H NMR using phenanthrene as an internal standard.

**Table S17.** Control experiments probing chloride effect

| entry | Lewis acid                      | additive                                               | time | yield <sup>a</sup> |
|-------|---------------------------------|--------------------------------------------------------|------|--------------------|
| 1     | none                            | none                                                   | 3 h  | 25%                |
| 2     | none                            | 30 mol% Bu <sub>4</sub> N <sup>+</sup> Cl <sup>-</sup> | 3 h  | 28%                |
| 3     | <b>1c</b> •Sc(OTf) <sub>3</sub> | none                                                   | 2 h  | 67%                |
| 4     | <b>1c</b> •Sc(OTf) <sub>3</sub> | 30 mol% Bu <sub>4</sub> N <sup>+</sup> Cl <sup>-</sup> | 2 h  | 98%                |
| 5     | <b>1c</b> •Sc(Cl) <sub>3</sub>  | none                                                   | 6 h  | 61%                |

<sup>a</sup> Determined by <sup>1</sup>H NMR analysis against a calibrated internal standard.

## XI. CFL Emission

The emission spectrum of the light source utilized in this study was analyzed using an Ocean Optics USB 2000+ UV-vis spectrometer and is shown in Figure S3.

**Figure S3.** Emission spectrum of the light source used in this study.

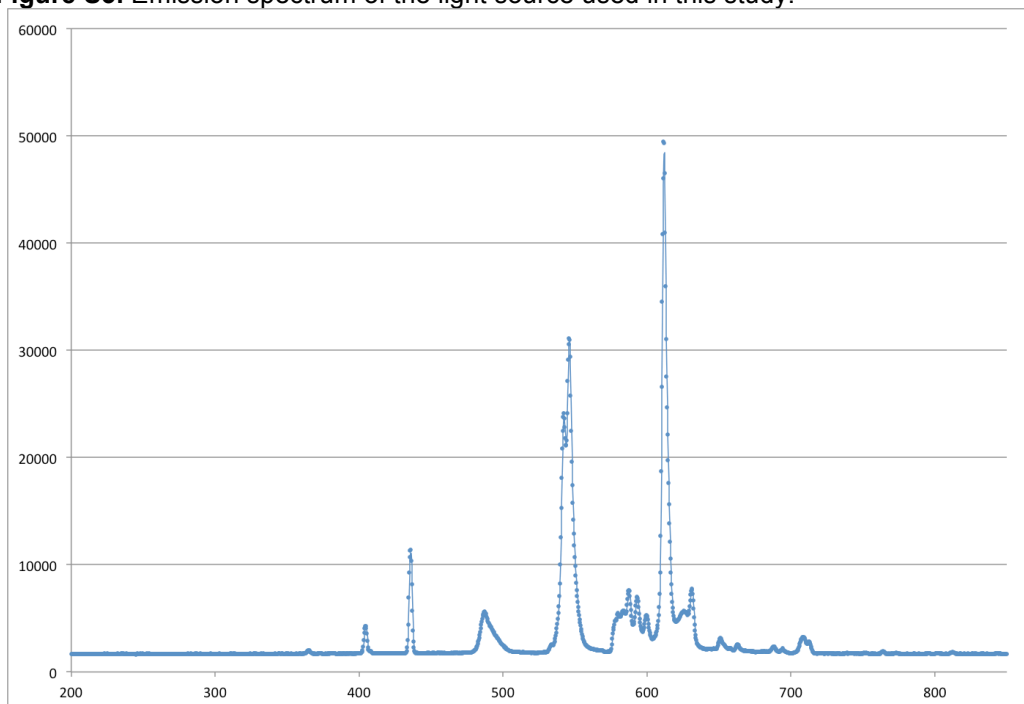

The power density of the 435 nm emission band at the reaction distance of 30 cm was measured to be 28 mW/cm<sup>2</sup> using a Newport Multi-Function Optical Meter outfitted with a low-power UV enhanced silicon photodetector (model 818-UV).

**XII. Proposed mechanism.** Based upon prior investigations of Brønsted acid-catalyzed  $\alpha$ -amino radical additions recently conducted in our laboratory,<sup>12</sup> we propose the mechanism depicted in Scheme S-1 to account for the reaction described in this manuscript. The reaction involves two independent catalytic functions — a photoredox process (red) and a Lewis acid catalyzed process (blue). The photocatalyst initiates the reaction by photooxidation of the  $\alpha$ -silylamine to afford an  $\alpha$ -amino radical. The Lewis acid controls the stereoselectivity of a product-forming chain process by activating the *N*-acyl pyrazolidinone Michael acceptor towards nucleophilic attack.

**Scheme S-1**

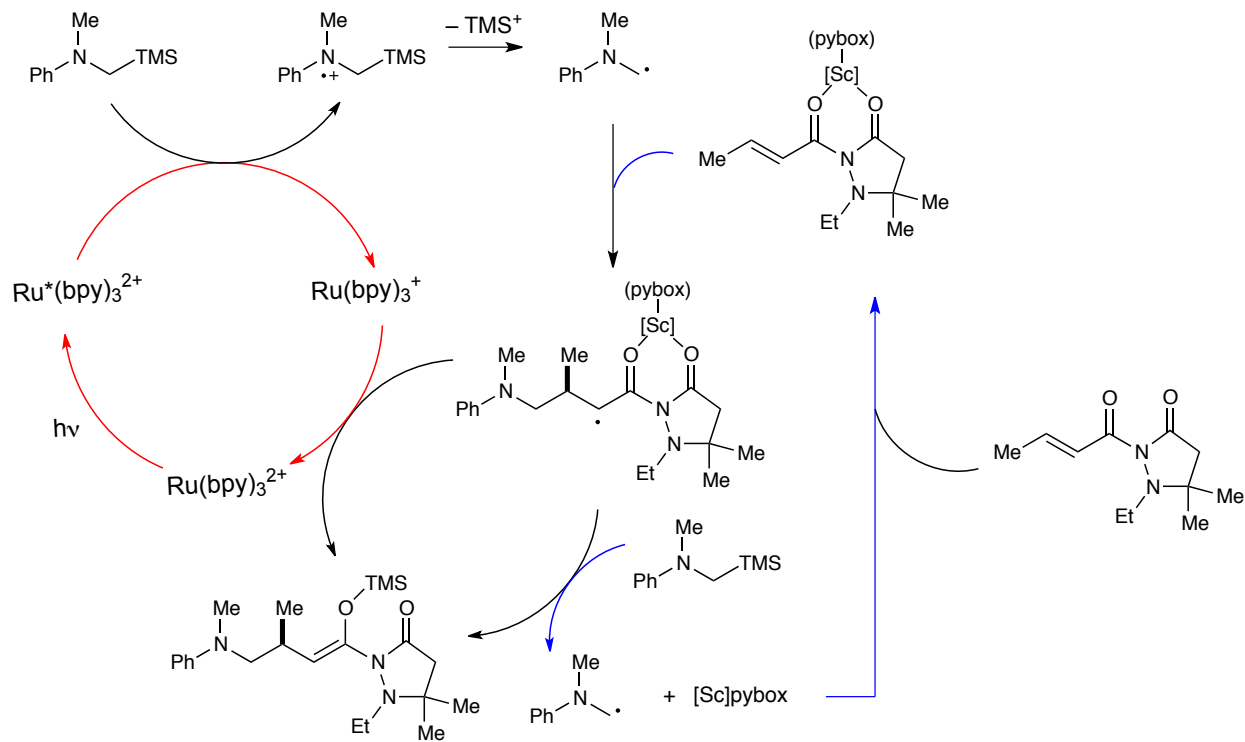



## XII. References

- <sup>1</sup> A.B. Pagnborn, M.A. Giardello, R.H. Grubbs, et. al *Organometallics* **1996**, *15*, 1518–1520.
- <sup>2</sup> X. Zhang, P.S. Mariano, *J. Org. Chem.* **1990**, *56*, 1655–1660.
- <sup>3</sup> M.P. Sibi, L.M. Stanley, X. Nie, L. Venkatraman, M. Liu, C.P. Jasperse, *J. Am. Chem. Soc.* **2007**, *129*, 395–405.
- <sup>4</sup> E. Hasegawa, M.A. Brumfield, P.S. Mariano, U.C. Yoon, *J. Org. Chem.* **1988**, *53*, 5435–5442.
- <sup>5</sup> W.C. Still, M. Kahn, A.J. Mitra, *J. Org. Chem.* **1978**, *43*, 2923–2925.
- <sup>6</sup> A. Cornejo, J.M. Fraile, J.I. Garcia, M.J. Gil, V. Martinez-Merino, J.A. Mayoral, E. Pires, I. Villalba, *Synlett* **2005**, 2321–2324.
- <sup>7</sup> J.R. Hwu, K.Y. King, *Chem. Eur. J.* **2005**, *11*, 3805–3815.
- <sup>8</sup> Bruker-AXS. (2007-2014) APEX2 (Ver. 2014.1-1), SADABS (2012-1), and SAINT+ (Ver. 8.32A) Software Reference Manuals. Bruker-AXS, Madison, Wisconsin, USA.
- <sup>9</sup> G.M. Sheldrick, (2008) SHELXL. *Acta Cryst.* **A64**, 112-122.
- <sup>10</sup> O.V. Dolomanov, L.J. Bourhis, R.J. Gildea, J.A.K. Howard, H. Puschmann, *J. Appl. Cryst.* **2009**, *42*, 339–341.
- <sup>11</sup> I.A. Guzei, (2013). Internal laboratory computer programs Gn.
- <sup>12</sup> L. Ruiz Espelt, E.M. Wiensch, T.P. Yoon, *J. Org. Chem.* **2013**, *78*, 4107–4114.
